# Supplementary material for: Structural and Phylogenetic Diversity of Anaerobic Carbon-Monoxide Dehydrogenases
Source: Front Microbiol. 2019 Jan 17;9:3353. doi: 10.3389/fmicb.2018.03353 (PMC6344411; doi:10.3389/fmicb.2018.03353)
Supplement: Supplementary file 2 [file Table_2.XLSX]

## Sheet: Supplementary Table 2
Supplementary Table 2. The Ni-CODHs genome dataset with taxonomies and genomic contexts.
GFF3 filename	Metagenome-assembled genome	taxonomy ID	Scientific name	Species	Genus	Family	Order	Class	Phylum	Domain	Contig No.	Ni-CODH accession No.	Clade	Structual group	Ni-CODH locus tag	Genomic context	*Direction of each gene is represented by "<" or ">", indicating "left" or "right", respectively.
GCA_000014945.1_ASM1494v1_genomic.gff	-	349307	Methanothrix thermoacetophila PT	Methanothrix thermoacetophila	Methanothrix	Methanosaetaceae	Methanosarcinales	Methanomicrobia	Euryarchaeota	Archaea	CP000477.1	ABK14089.1	A	A-2	Mthe_0292	<Mthe_0287(COG1456)	<Mthe_0288(COG2069)	<Mthe_0289(COG3640)	<Mthe_0290(COG1614)	<Mthe_0291(COG1880)	<Mthe_0292(COG1152)
GCA_000014945.1_ASM1494v1_genomic.gff	-	349307	Methanothrix thermoacetophila PT	Methanothrix thermoacetophila	Methanothrix	Methanosaetaceae	Methanosarcinales	Methanomicrobia	Euryarchaeota	Archaea	CP000477.1	ABK14995.1	D	D-1	Mthe_1216	<Mthe_1216(COG1151)	<Mthe_1217
GCA_000014945.1_ASM1494v1_genomic.gff	-	349307	Methanothrix thermoacetophila PT	Methanothrix thermoacetophila	Methanothrix	Methanosaetaceae	Methanosarcinales	Methanomicrobia	Euryarchaeota	Archaea	CP000477.1	ABK15116.1	E	E-1	Mthe_1341	<Mthe_1337	<Mthe_1338(COG1142)	<Mthe_1339(COG3383)	<Mthe_1340(COG0437)	<Mthe_1341(COG1151)
GCA_000175395.2_ASM17539v2_genomic.gff	-	592027	Clostridium botulinum D str. 1873	Clostridium botulinum	Clostridium	Clostridiaceae	Clostridiales	Clostridia	Firmicutes	Bacteria	ACSJ01000001.1	EES92243.1	C	C-1	CLG_B0186	<CLG_B0186(COG1151)	<CLG_B0187(COG1959)
GCA_000183505.2_ASM18350v1_genomic.gff	MAG	879309	Veillonella sp. oral taxon 158 str. F0412	Veillonella sp. oral taxon 158	Veillonella	Veillonellaceae	Veillonellales	Negativicutes	Firmicutes	Bacteria	AENU01000018.1	EFR59944.1	B	B-1	HMPREF9199_0272	<HMPREF9199_0272(COG1151)
GCA_000210015.1_ASM21001v1_genomic.gff	-	657314	Blautia obeum A2-162	Blautia obeum	Blautia	Lachnospiraceae	Clostridiales	Clostridia	Firmicutes	Bacteria	FP929054.1	CBL24127.1	E	E-1	CK5_28700	<CK5_28640(COG3894)	<CK5_28650(COG1410)	<CK5_28660(COG1456)	<CK5_28670(COG2069)	<CK5_28690(COG3640)	<CK5_28700(COG1151)	<CK5_28710(COG3640)	<CK5_28720(COG0685)	<CK5_28730(COG1532)	<CK5_28740
GCA_000214705.1_ASM21470v1_genomic.gff	-	760568	Desulfotomaculum kuznetsovii DSM 6115	Desulfotomaculum kuznetsovii	Desulfotomaculum	Peptococcaceae	Clostridiales	Clostridia	Firmicutes	Bacteria	CP002770.1	AEG15075.1	F	F-1	Desku_1492	<Desku_1477(COG1908)	<Desku_1478(COG1148)	<Desku_1479(COG0247)	<Desku_1480(COG0543)	<Desku_1481	<Desku_1482	<Desku_1483(COG1908)	<Desku_1484(COG2048)	<Desku_1485(COG1150)	<Desku_1486(COG1148)	<Desku_1487(COG1410)	<Desku_1488(COG2069)	<Desku_1489(COG3640)	<Desku_1490(COG1456)	<Desku_1491(COG1614)	<Desku_1492(COG1151)	<Desku_1493(COG3640)	<Desku_1494(COG3937)	>Desku_1496(COG1143)
GCA_000214705.1_ASM21470v1_genomic.gff	-	760568	Desulfotomaculum kuznetsovii DSM 6115	Desulfotomaculum kuznetsovii	Desulfotomaculum	Peptococcaceae	Clostridiales	Clostridia	Firmicutes	Bacteria	CP002770.1	AEG15693.1	F	F-1	Desku_2150	<Desku_2149(COG1614)	<Desku_2150(COG1151)
GCA_000214705.1_ASM21470v1_genomic.gff	-	760568	Desulfotomaculum kuznetsovii DSM 6115	Desulfotomaculum kuznetsovii	Desulfotomaculum	Peptococcaceae	Clostridiales	Clostridia	Firmicutes	Bacteria	CP002770.1	AEG16299.1	E	E-1	Desku_2787	<Desku_2786(COG1142)	<Desku_2787(COG1151)	<Desku_2788(COG1251)	<Desku_2789(COG0607)
GCA_000219255.3_CSt2.0_genomic.gff	-	929505	Clostridium botulinum C str. Stockholm	Clostridium botulinum	Clostridium	Clostridiaceae	Clostridiales	Clostridia	Firmicutes	Bacteria	AESA02000032.1	EGO88302.1	C	C-1	CBCST_06353	>CBCST_06353(COG1151)
GCA_000243455.2_ASM24345v2_genomic.gff	-	647171	Methanotorris formicicus Mc-S-70	Methanotorris formicicus	Methanotorris	Methanocaldococcaceae	Methanococcales	Methanococci	Euryarchaeota	Archaea	AGJL01000039.1	EHP85126.1	C	C-3	MetfoDRAFT_1449	>MetfoDRAFT_1444(COG2217)	>MetfoDRAFT_1445(COG2217)	>MetfoDRAFT_1446	>MetfoDRAFT_1447(COG0655)	>MetfoDRAFT_1448(COG1036)	>MetfoDRAFT_1449(COG1151)	>MetfoDRAFT_1450(COG3259)	>MetfoDRAFT_1451(COG1941)	>MetfoDRAFT_1452(COG1035)	>MetfoDRAFT_1453(COG1059)
GCA_000243455.2_ASM24345v2_genomic.gff	-	647171	Methanotorris formicicus Mc-S-70	Methanotorris formicicus	Methanotorris	Methanocaldococcaceae	Methanococcales	Methanococci	Euryarchaeota	Archaea	AGJL01000053.1	EHP84374.1	A	A-1	MetfoDRAFT_1679	<MetfoDRAFT_1675	<MetfoDRAFT_1676(COG1614)	<MetfoDRAFT_1677(COG1142)	<MetfoDRAFT_1678(COG1880)	<MetfoDRAFT_1679(COG1152)
GCA_000307955.1_ASM30795v1_genomic.gff	MAG	1206767	Desulfovibrio magneticus str. Maddingley MBC34	Desulfovibrio magneticus	Desulfovibrio	Desulfovibrionaceae	Desulfovibrionales	Deltaproteobacteria	Proteobacteria	Bacteria	ALAO01000126.1	EKO39632.1	E	E-2	B193_1652	>B193_1649(COG0784)	>B193_1650(COG2206)	>B193_1651(COG0664)	>B193_1652(COG1151)	>B193_1653(COG3640)
GCA_000309865.1_MMad_1.0_genomic.gff	MAG	1220534	Methanobacterium sp. Maddingley MBC34	Methanobacterium sp. Maddingley MBC34	Methanobacterium	Methanobacteriaceae	Methanobacteriales	Methanobacteria	Euryarchaeota	Archaea	AMGN01000005.1	EKQ55335.1	A	A-1	B655_0322	>B655_0322(COG1152)	>B655_0323(COG1880)	>B655_0324(COG1614)	>B655_0325(COG3640)	>B655_0326(COG2069)	>B655_0327(COG1456)	>B655_0328(COG1142)
GCA_000341715.1_ASM34171v1_genomic.gff	-	1236903	Methanosarcina mazei Tuc01	Methanosarcina mazei	Methanosarcina	Methanosarcinaceae	Methanosarcinales	Methanomicrobia	Euryarchaeota	Archaea	CP004144.1	AGF96112.1	A	A-1	MmTuc01_0700	>MmTuc01_0700(COG1152)	>MmTuc01_0701(COG1880)	>MmTuc01_0702(COG1614)	>MmTuc01_0703(COG3640)
GCA_000341715.1_ASM34171v1_genomic.gff	-	1236903	Methanosarcina mazei Tuc01	Methanosarcina mazei	Methanosarcina	Methanosarcinaceae	Methanosarcinales	Methanomicrobia	Euryarchaeota	Archaea	CP004144.1	AGF97661.1	D	D-1	MmTuc01_2347	<MmTuc01_2347(COG1151)	<MmTuc01_2348
GCA_000344075.2_CULT_genomic.gff	-	1288971	[Clostridium] ultunense Esp	[Clostridium] ultunense	unclassified Tissierellaceae	Tissierellaceae	Tissierellales	Tissierellia	Firmicutes	Bacteria	HG764817.1	CCQ93465.1	C	C-2	CULT_1380015	<CULT_1380002(COG0549)	<CULT_1380003(COG1015)	<CULT_1380004	<CULT_1380005	<CULT_1380006(COG4100)	<CULT_1380007(COG1735)	<CULT_1380009	<CULT_1380010	<CULT_1380011	<CULT_1380012	<CULT_1380013(COG1251)	<CULT_1380014(COG0437)	<CULT_1380015(COG1151)	<CULT_1380016(COG1959)
GCA_000431175.1_MGS59_genomic.gff	MAG	1263064	Clostridium bolteae CAG:59	Clostridium bolteae CAG:59	Clostridium	Clostridiaceae	Clostridiales	Clostridia	Firmicutes	Bacteria	HF988345.1	CCX97886.1	C	C-1	BN723_02790	<BN723_02788(COG1251)	<BN723_02789(COG1142)	<BN723_02790(COG1151)	<BN723_02791(COG1959)	>BN723_02792(COG0534)
GCA_000431475.1_MGS364_genomic.gff	MAG	1262983	Lachnospiraceae bacterium CAG:364	Lachnospiraceae bacterium CAG:364	unclassified Lachnospiraceae	Lachnospiraceae	Clostridiales	Clostridia	Firmicutes	Bacteria	FR888154.1	CDC07965.1	C	C-1	BN627_01610	>BN627_01607	>BN627_01608(COG3864)	>BN627_01609(COG0714)	>BN627_01610(COG1151)	>BN627_01611(COG0437)	>BN627_01612(COG1251)
GCA_000431655.1_MGS348_genomic.gff	MAG	1263069	Clostridium nexile CAG:348	Clostridium nexile CAG:348	Clostridium	Clostridiaceae	Clostridiales	Clostridia	Firmicutes	Bacteria	FR888631.1	CDC22014.1	C	C-1	BN618_01920	<BN618_01918(COG1251)	<BN618_01919(COG0437)	<BN618_01920(COG1151)	<BN618_01921(COG1959)	<BN618_01922(COG1502)
GCA_000432135.1_MGS124_genomic.gff	MAG	1263002	Firmicutes bacterium CAG:124	Firmicutes bacterium CAG:124	unclassified Firmicutes	unclassified Firmicutes	unclassified Firmicutes	unclassified Firmicutes	Firmicutes	Bacteria	HF990656.1	CCY42051.1	E	E-1	BN480_02349	>BN480_02349(COG1151)	>BN480_02350(COG3640)	>BN480_02351(COG1614)
GCA_000432195.1_MGS424_genomic.gff	MAG	1263022	Firmicutes bacterium CAG:424	Firmicutes bacterium CAG:424	unclassified Firmicutes	unclassified Firmicutes	unclassified Firmicutes	unclassified Firmicutes	Firmicutes	Bacteria	FR889514.1	CDC46349.1	E	E-1	BN652_01391	<BN652_01386(COG0488)	<BN652_01387(COG1393)	<BN652_01388(COG2703)	<BN652_01389(COG3543)	<BN652_01390(COG1268)	<BN652_01391(COG1151)	<BN652_01392(COG0583)	<BN652_01393	<BN652_01394(COG0534)	<BN652_01395	<BN652_01396(COG1696)	<BN652_01397(COG1472)	>BN652_01398(COG2207)
GCA_000432195.1_MGS424_genomic.gff	MAG	1263022	Firmicutes bacterium CAG:424	Firmicutes bacterium CAG:424	unclassified Firmicutes	unclassified Firmicutes	unclassified Firmicutes	unclassified Firmicutes	Firmicutes	Bacteria	FR889539.1	CDC42792.1	E	E-1	BN652_02641	>BN652_02637	>BN652_02638	>BN652_02639(COG0685)	>BN652_02640(COG3640)	>BN652_02641(COG1151)	>BN652_02642(COG3640)	>BN652_02643(COG1614)	>BN652_02644(COG2069)	>BN652_02645(COG1456)	>BN652_02646(COG1410)	>BN652_02647(COG3894)	>BN652_02648	>BN652_02649	>BN652_02650(COG2759)	>BN652_02651(COG0628)	>BN652_02652(COG0168)	>BN652_02653(COG0569)	>BN652_02654(COG0524)	>BN652_02655(COG2759)	>BN652_02656(COG3404)	>BN652_02657(COG0190)
GCA_000432335.1_MGS646_genomic.gff	MAG	1262995	Firmicutes bacterium CAG:646	Firmicutes bacterium CAG:646	unclassified Firmicutes	unclassified Firmicutes	unclassified Firmicutes	unclassified Firmicutes	Firmicutes	Bacteria	HF995414.1	CCZ34522.1	E	E-1	BN747_02662	>BN747_02658	>BN747_02659	>BN747_02660(COG0685)	>BN747_02661(COG3640)	>BN747_02662(COG1151)	>BN747_02663(COG3640)	>BN747_02664(COG1614)	>BN747_02665(COG2069)	>BN747_02666(COG1456)	>BN747_02667(COG1410)	>BN747_02668(COG3894)
GCA_000433555.1_MGS126_genomic.gff	MAG	1263106	Ruminococcus gnavus CAG:126	Ruminococcus gnavus CAG:126	Ruminococcus	Ruminococcaceae	Clostridiales	Clostridia	Firmicutes	Bacteria	HF997209.1	CCZ66653.1	C	C-1	BN481_01933	<BN481_01931(COG1609)	>BN481_01932(COG1959)	>BN481_01933(COG1151)	>BN481_01934(COG0437)	>BN481_01935(COG1251)	<BN481_01936(COG2873)
GCA_000433815.1_MGS257_genomic.gff	MAG	1262756	Blautia sp. CAG:257	Blautia sp. CAG:257	Blautia	Lachnospiraceae	Clostridiales	Clostridia	Firmicutes	Bacteria	HF999018.1	CDA06611.1	E	E-1	BN568_00743	>BN568_00739	>BN568_00740(COG1532)	>BN568_00741(COG0685)	>BN568_00742(COG3640)	>BN568_00743(COG1151)	>BN568_00744(COG3640)	>BN568_00745(COG1614)	>BN568_00746(COG2069)	>BN568_00747(COG1456)	>BN568_00748(COG1410)	>BN568_00749(COG3894)	>BN568_00750	>BN568_00751(COG3404)	>BN568_00752(COG0190)	>BN568_00753	<BN568_00754(COG4624)	>BN568_00755(COG1905)	>BN568_00756(COG1894)	>BN568_00757(COG4624)
GCA_000433815.1_MGS257_genomic.gff	MAG	1262756	Blautia sp. CAG:257	Blautia sp. CAG:257	Blautia	Lachnospiraceae	Clostridiales	Clostridia	Firmicutes	Bacteria	HF999058.1	CDA04895.1	C	C-1	BN568_01451	<BN568_01445(COG4917)	<BN568_01446(COG4810)	<BN568_01447(COG4810)	<BN568_01448	<BN568_01449(COG1251)	<BN568_01450(COG0437)	<BN568_01451(COG1151)	<BN568_01452(COG1609)
GCA_000433835.1_MGS1329_genomic.gff	MAG	1263063	Clostridium bartlettii CAG:1329	Clostridium bartlettii CAG:1329	Clostridium	Clostridiaceae	Clostridiales	Clostridia	Firmicutes	Bacteria	HF999313.1	CDA09257.1	C	C-1	BN488_00381	<BN488_00380(COG1143)	>BN488_00381(COG1151)	>BN488_00382(COG0437)	>BN488_00383(COG1251)
GCA_000434575.1_MGS56_genomic.gff	MAG	1263031	Firmicutes bacterium CAG:56	Firmicutes bacterium CAG:56	unclassified Firmicutes	unclassified Firmicutes	unclassified Firmicutes	unclassified Firmicutes	Firmicutes	Bacteria	FR880396.1	CDA62437.1	B	B-1	BN708_00347	>BN708_00347(COG1151)	>BN708_00348(COG0715)	>BN708_00349(COG0600)	>BN708_00350(COG1116)
GCA_000434575.1_MGS56_genomic.gff	MAG	1263031	Firmicutes bacterium CAG:56	Firmicutes bacterium CAG:56	unclassified Firmicutes	unclassified Firmicutes	unclassified Firmicutes	unclassified Firmicutes	Firmicutes	Bacteria	FR880534.1	CDA64191.1	E	E-1	BN708_01532	<BN708_01523(COG0190)	<BN708_01524(COG3404)	<BN708_01525(COG3894)	<BN708_01526(COG1410)	<BN708_01527(COG1456)	<BN708_01528(COG2069)	<BN708_01529(COG1614)	<BN708_01530(COG1152)	<BN708_01531(COG3640)	<BN708_01532(COG1151)	<BN708_01533(COG3640)	<BN708_01534(COG0685)	<BN708_01535	<BN708_01536	<BN708_01537	<BN708_01538(COG1101)	<BN708_01539(COG4120)	<BN708_01540(COG2984)	<BN708_01541(COG0240)	<BN708_01542(COG0240)	<BN708_01543(COG0344)	<BN708_01544(COG1160)	<BN708_01545(COG1625)
GCA_000434635.1_MGS110_genomic.gff	MAG	1263000	Firmicutes bacterium CAG:110	Firmicutes bacterium CAG:110	unclassified Firmicutes	unclassified Firmicutes	unclassified Firmicutes	unclassified Firmicutes	Firmicutes	Bacteria	HF988092.1	CCX91131.1	E	E-1	BN466_01223	<BN466_01221(COG1614)	<BN466_01222(COG3640)	<BN466_01223(COG1151)
GCA_000435215.1_MGS52_genomic.gff	MAG	1262758	Blautia sp. CAG:52	Blautia sp. CAG:52	Blautia	Lachnospiraceae	Clostridiales	Clostridia	Firmicutes	Bacteria	FR883667.1	CDB21340.1	E	E-1	BN690_00410	<BN690_00409(COG3640)	<BN690_00410(COG1151)	<BN690_00411(COG3640)	<BN690_00412	<BN690_00413
GCA_000435995.1_MGS137_genomic.gff	MAG	1263004	Firmicutes bacterium CAG:137	Firmicutes bacterium CAG:137	unclassified Firmicutes	unclassified Firmicutes	unclassified Firmicutes	unclassified Firmicutes	Firmicutes	Bacteria	FR884413.1	CDB30709.1	E	E-1	BN490_01870	<BN490_01870(COG1151)	>BN490_01871(COG0534)
GCA_000436615.1_MGS237_genomic.gff	MAG	1262755	Blautia sp. CAG:237	Blautia sp. CAG:237	Blautia	Lachnospiraceae	Clostridiales	Clostridia	Firmicutes	Bacteria	FR886706.1	CDB78440.1	E	E-1	BN552_00707	>BN552_00703	>BN552_00704(COG1532)	>BN552_00705(COG0685)	>BN552_00706(COG3640)	>BN552_00707(COG1151)	>BN552_00708(COG3640)	>BN552_00709(COG1614)	>BN552_00710(COG2069)	>BN552_00711(COG1456)	>BN552_00712(COG1410)	>BN552_00713(COG3894)	>BN552_00714	>BN552_00715(COG2759)	>BN552_00716(COG2759)	>BN552_00717(COG2759)
GCA_000436735.1_MGS170_genomic.gff	MAG	1263006	Firmicutes bacterium CAG:170	Firmicutes bacterium CAG:170	unclassified Firmicutes	unclassified Firmicutes	unclassified Firmicutes	unclassified Firmicutes	Firmicutes	Bacteria	FR887151.1	CDB86591.1	E	E-1	BN515_00837	>BN515_00835(COG0465)	>BN515_00836(COG0668)	>BN515_00837(COG1151)	>BN515_00838(COG3640)	>BN515_00839(COG1614)
GCA_000436935.1_MGS227_genomic.gff	MAG	1263010	Firmicutes bacterium CAG:227	Firmicutes bacterium CAG:227	unclassified Firmicutes	unclassified Firmicutes	unclassified Firmicutes	unclassified Firmicutes	Firmicutes	Bacteria	FR891755.1	CDC94221.1	C	C-1	BN546_00495	>BN546_00490(COG1686)	>BN546_00491	>BN546_00492	>BN546_00493(COG3864)	>BN546_00494(COG0714)	>BN546_00495(COG1151)	>BN546_00496(COG1142)	>BN546_00497(COG1251)
GCA_000436935.1_MGS227_genomic.gff	MAG	1263010	Firmicutes bacterium CAG:227	Firmicutes bacterium CAG:227	unclassified Firmicutes	unclassified Firmicutes	unclassified Firmicutes	unclassified Firmicutes	Firmicutes	Bacteria	FR891756.1	CDC94257.1	E	E-1	BN546_00515	<BN546_00505	<BN546_00506(COG0190)	<BN546_00507(COG3404)	<BN546_00508	<BN546_00509(COG3894)	<BN546_00510(COG1410)	<BN546_00511(COG1456)	<BN546_00512(COG2069)	<BN546_00513(COG1614)	<BN546_00514(COG3640)	<BN546_00515(COG1151)	<BN546_00516(COG3640)	<BN546_00517	<BN546_00518	<BN546_00519(COG1532)	<BN546_00520	<BN546_00521(COG0419)	<BN546_00522(COG0420)
GCA_000436935.1_MGS227_genomic.gff	MAG	1263010	Firmicutes bacterium CAG:227	Firmicutes bacterium CAG:227	unclassified Firmicutes	unclassified Firmicutes	unclassified Firmicutes	unclassified Firmicutes	Firmicutes	Bacteria	FR891820.1	CDC92677.1	B	B-1	BN546_01964	<BN546_01963(COG0484)	>BN546_01964(COG1151)	>BN546_01965(COG0715)	>BN546_01966(COG0600)	>BN546_01967(COG1116)	<BN546_01968(COG1595)
GCA_000437095.1_MGS471_genomic.gff	MAG	1262948	Roseburia sp. CAG:471	Roseburia sp. CAG:471	Roseburia	Lachnospiraceae	Clostridiales	Clostridia	Firmicutes	Bacteria	FR897442.1	CDE01960.1	E	E-1	BN671_01228	<BN671_01227(COG3640)	<BN671_01228(COG1151)	<BN671_01229(COG3640)	<BN671_01230	<BN671_01231
GCA_000438315.1_MGS353_genomic.gff	MAG	1262955	Ruminococcus sp. CAG:353	Ruminococcus sp. CAG:353	Ruminococcus	Ruminococcaceae	Clostridiales	Clostridia	Firmicutes	Bacteria	FR901380.1	CDE77851.1	B	B-1	BN622_00769	>BN622_00765(COG1733)	>BN622_00766(COG0715)	>BN622_00767(COG0600)	>BN622_00768(COG1116)	>BN622_00769(COG1151)	>BN622_00770	>BN622_00771	>BN622_00772
GCA_000448705.1_HSIVP1_1.0_genomic.gff	-	1316254	Veillonella parvula HSIVP1	Veillonella parvula	Veillonella	Veillonellaceae	Veillonellales	Negativicutes	Firmicutes	Bacteria	CM002135.1	EQC67828.1	B	B-1	HSIVP1_978	>HSIVP1_978(COG1151)
GCA_000495595.1_berrySRB1_genomic.gff	MAG	1385624	uncultured Desulfofustis sp. PB-SRB1	uncultured Desulfofustis sp. PB-SRB1	Desulfofustis	Desulfobulbaceae	Desulfobacterales	Deltaproteobacteria	Proteobacteria	Bacteria	AVFQ01000178.1	ESQ10870.1	E	E-1	N839_03790	>N839_03765(COG0664)	>N839_03770(COG1902)	>N839_03775	>N839_03780(COG3894)	>N839_03785(COG2069)	>N839_03790(COG1151)	>N839_03795(COG1614)	>N839_03800(COG1456)	>N839_03805(COG1410)	>N839_03810
GCA_000496155.1_fer2_genomic.gff	MAG	261388	Ferroplasma sp. Type II	Ferroplasma sp. Type II	Ferroplasma	Ferroplasmaceae	Thermoplasmatales	Thermoplasmata	Euryarchaeota	Archaea	KI542682.1	EQB74547.1	F	F-1	AMDU4_FER2C00005G0045	<AMDU4_FER2C00005G0042	<AMDU4_FER2C00005G0043(COG2236)	<AMDU4_FER2C00005G0044(COG3640)	<AMDU4_FER2C00005G0045(COG1151)	<AMDU4_FER2C00005G0046(COG2814)
GCA_000508445.1_CloBart_DORA_8_9_velvet_1.1_genomic.gff	MAG	1403940	Intestinibacter bartlettii DORA_8_9	Intestinibacter bartlettii	Intestinibacter	Peptostreptococcaceae	Clostridiales	Clostridia	Firmicutes	Bacteria	AZLW01000142.1	ETI95811.1	E	E-1	Q606_CBAC00142G0002	<Q606_CBAC00142G0001(COG3640)	<Q606_CBAC00142G0002(COG1151)
GCA_000508585.1_Vll_DORA_11_velvet_1.1_genomic.gff	MAG	1403949	Veillonella dispar DORA_11	Veillonella dispar	Veillonella	Veillonellaceae	Veillonellales	Negativicutes	Firmicutes	Bacteria	AZMJ01000523.1	ETI98991.1	B	B-1	Q619_VDC00523G0031	<Q619_VDC00523G0031(COG1151)
GCA_000510385.1_BU063sc2_genomic.gff	MAG	1411148	Tannerella sp. oral taxon BU063 isolate Cell 2	Tannerella sp. oral taxon HOT-286	Tannerella	Tannerellaceae	Bacteroidales	Bacteroidia	Bacteroidetes	Bacteria	AYUF01000490.1	ETK01172.1	B	B-2	N425_11370	>N425_11370(COG1151)	>N425_11375(COG0715)	>N425_11380(COG0600)	>N425_11385(COG1116)	>N425_11390(COG0310)
GCA_000510505.1_BU063sc5_genomic.gff	MAG	1410950	Tannerella sp. oral taxon BU063 isolate Cell 5	Tannerella sp. oral taxon HOT-286	Tannerella	Tannerellaceae	Bacteroidales	Bacteroidia	Bacteroidetes	Bacteria	AYYC01000742.1	ETK03086.1	B	B-1	T229_16025	>T229_16025(COG1151)	>T229_16030(COG0715)	>T229_16035(COG0600)	>T229_16040(COG1116)	>T229_16045(COG0310)
GCA_000510545.1_BU063sc13_genomic.gff	MAG	1411022	Tannerella sp. oral taxon BU063 isolate Cell 1/3	Tannerella sp. oral taxon HOT-286	Tannerella	Tannerellaceae	Bacteroidales	Bacteroidia	Bacteroidetes	Bacteria	AYYE01000920.1	ETK08507.1	B	B-2	T230_07140	>T230_07140(COG1151)	>T230_07145(COG0715)	>T230_07150(COG0600)	>T230_07155(COG0600)	>T230_07160(COG1116)	>T230_07165(COG0310)
GCA_000516475.1_Candidatus_Magnetoglobus_multicellularis_genomic.gff	MAG	890399	Candidatus Magnetoglobus multicellularis str. Araruama	Candidatus Magnetoglobus multicellularis	Candidatus Magnetoglobus	Desulfobacteraceae	Desulfobacterales	Deltaproteobacteria	Proteobacteria	Bacteria	ATBP01000024.1	ETR74057.1	E	E-2	OMM_00491	>OMM_06559	>OMM_00488	>OMM_06556(COG1763)	>OMM_00489(COG1251)	>OMM_00490(COG1142)	>OMM_00491(COG1151)	>OMM_00492
GCA_000516475.1_Candidatus_Magnetoglobus_multicellularis_genomic.gff	MAG	890399	Candidatus Magnetoglobus multicellularis str. Araruama	Candidatus Magnetoglobus multicellularis	Candidatus Magnetoglobus	Desulfobacteraceae	Desulfobacterales	Deltaproteobacteria	Proteobacteria	Bacteria	ATBP01000223.1	ETR71782.1	E	E-1	OMM_07891	>OMM_07891(COG1151)
GCA_000521465.1_ASM52146v1_genomic.gff	-	1294263	[Clostridium] straminisolvens JCM 21531	[Clostridium] straminisolvens	Ruminiclostridium	Ruminococcaceae	Clostridiales	Clostridia	Firmicutes	Bacteria	BAVR01000072.1	GAE90455.1	D	D-1	JCM21531_4070	>JCM21531_4070(COG1151)
GCA_000743525.1_ASM74352v1_genomic.gff	MAG	1537915	Sulfurospirillum sp. SCADC	Sulfurospirillum sp. SCADC	Sulfurospirillum	Campylobacteraceae	Campylobacterales	Epsilonproteobacteria	Proteobacteria	Bacteria	JQGK01000012.1	KFL33843.1	F	F-1	JU57_08980	<JU57_08935(COG3260)	<JU57_08940(COG1143)	<JU57_08945(COG3261)	<JU57_08950(COG0651)	<JU57_08955(COG4237)	<JU57_08960(COG0650)	<JU57_08965(COG0651)	<JU57_08970(COG1142)	<JU57_08975(COG3640)	<JU57_08980(COG1151)	<JU57_08985(COG1142)	<JU57_08995(COG0745)	>JU57_09000(COG0488)
GCA_000765165.1_ASM76516v1_genomic.gff	MAG	1487921	Clostridium sp. HMP27	Clostridium sp. HMP27	Clostridium	Clostridiaceae	Clostridiales	Clostridia	Firmicutes	Bacteria	JMFY01000058.1	KGK81739.1	B	B-1	DP68_18095	<DP68_18080(COG1116)	<DP68_18085(COG0600)	<DP68_18090(COG0715)	<DP68_18095(COG1151)
GCA_000765165.1_ASM76516v1_genomic.gff	MAG	1487921	Clostridium sp. HMP27	Clostridium sp. HMP27	Clostridium	Clostridiaceae	Clostridiales	Clostridia	Firmicutes	Bacteria	JMFY01000065.1	KGK81116.1	D	D-1	DP68_18605	<DP68_18590	<DP68_18595(COG0488)	<DP68_18600(COG0778)	<DP68_18605(COG1151)
GCA_000769715.1_ASM76971v1_genomic.gff	MAG	1536652	Desulfobulbus sp. Tol-SR	Desulfobulbus sp. Tol-SR	Desulfobulbus	Desulfobulbaceae	Desulfobacterales	Deltaproteobacteria	Proteobacteria	Bacteria	JROS01000052.1	KGO34036.1	E	E-1	JT06_10795	<JT06_10770(COG3640)	<JT06_10775	<JT06_10780(COG1410)	<JT06_10785(COG1456)	<JT06_10790(COG1614)	<JT06_10795(COG1151)	<JT06_10800(COG2069)	<JT06_10805(COG3894)
GCA_000769715.1_ASM76971v1_genomic.gff	MAG	1536652	Desulfobulbus sp. Tol-SR	Desulfobulbus sp. Tol-SR	Desulfobulbus	Desulfobulbaceae	Desulfobacterales	Deltaproteobacteria	Proteobacteria	Bacteria	JROS01000121.1	KGO32983.1	F	F-1	JT06_17280	<JT06_17270(COG1251)	<JT06_17275(COG1142)	<JT06_17280(COG1151)
GCA_000770645.1_ASM77064v1_genomic.gff	MAG	1536651	Desulfosporosinus sp. Tol-M	Desulfosporosinus sp. Tol-M	Desulfosporosinus	Peptococcaceae	Clostridiales	Clostridia	Firmicutes	Bacteria	JQID01000035.1	KGP77044.1	F	F-1	JT05_01490	<JT05_01475(COG2069)	<JT05_01480(COG1456)	<JT05_01485(COG1614)	<JT05_01490(COG1151)	<JT05_01495(COG3640)	<JT05_01500(COG1307)
GCA_000786775.1_ASM78677v1_genomic.gff	MAG	237368	Candidatus Scalindua brodae	Candidatus Scalindua brodae	Candidatus Scalindua	Candidatus Brocadiaceae	Candidatus Brocadiales	Planctomycetia	Planctomycetes	Bacteria	JRYO01000033.1	KHE93848.1	F	F-1	SCABRO_00405	>SCABRO_00405(COG1151)
GCA_000786775.1_ASM78677v1_genomic.gff	MAG	237368	Candidatus Scalindua brodae	Candidatus Scalindua brodae	Candidatus Scalindua	Candidatus Brocadiaceae	Candidatus Brocadiales	Planctomycetia	Planctomycetes	Bacteria	JRYO01000081.1	KHE93028.1	E	E-1	SCABRO_01191	>SCABRO_01191(COG1151)	>SCABRO_01192	>SCABRO_01193(COG0674)	>SCABRO_01194(COG1013)	>SCABRO_01195(COG1013)	>SCABRO_01196(COG1252)
GCA_000802045.1_ASM80204v1_genomic.gff	MAG	1531962	Peptococcaceae bacterium BICA1-8	Peptococcaceae bacterium BICA1-8	unclassified Peptococcaceae	Peptococcaceae	Clostridiales	Clostridia	Firmicutes	Bacteria	JUEF01000031.1	KJS87629.1	D	D-1	JM58_03725	<JM58_03665(COG2204)	<JM58_03670(COG0413)	<JM58_03675(COG1995)	<JM58_03680(COG3395)	<JM58_03685(COG0129)	<JM58_03690(COG0436)	<JM58_03695(COG2759)	<JM58_03700(COG1414)	<JM58_03705(COG4992)	<JM58_03710(COG4175)	<JM58_03715(COG4176)	<JM58_03720(COG2113)	<JM58_03725(COG1151)	<JM58_03730(COG1171)
GCA_000802045.1_ASM80204v1_genomic.gff	MAG	1531962	Peptococcaceae bacterium BICA1-8	Peptococcaceae bacterium BICA1-8	unclassified Peptococcaceae	Peptococcaceae	Clostridiales	Clostridia	Firmicutes	Bacteria	JUEF01000138.1	KJS81291.1	F	F-1	JM58_17335	<JM58_17295	<JM58_17300(COG0685)	<JM58_17305(COG1410)	<JM58_17310(COG2069)	<JM58_17315(COG3640)	<JM58_17320(COG3894)	<JM58_17325(COG1456)	<JM58_17330(COG1614)	<JM58_17335(COG1151)	<JM58_17340(COG3640)
GCA_000802095.1_ASM80209v1_genomic.gff	MAG	1531961	Peptococcaceae bacterium BICA1-7	Peptococcaceae bacterium BICA1-7	unclassified Peptococcaceae	Peptococcaceae	Clostridiales	Clostridia	Firmicutes	Bacteria	JUEB01000026.1	KJS65289.1	F	F-1	JL50_15935	<JL50_15905(COG1148)	<JL50_15910(COG1410)	<JL50_15915(COG2069)	<JL50_15920(COG3640)	<JL50_15925(COG1456)	<JL50_15930(COG1614)	<JL50_15935(COG1151)	<JL50_15940(COG3640)	<JL50_15945
GCA_000802095.1_ASM80209v1_genomic.gff	MAG	1531961	Peptococcaceae bacterium BICA1-7	Peptococcaceae bacterium BICA1-7	unclassified Peptococcaceae	Peptococcaceae	Clostridiales	Clostridia	Firmicutes	Bacteria	JUEB01000033.1	KJS64197.1	F	F-1	JL50_21285	<JL50_21280(COG1614)	<JL50_21285(COG1151)
GCA_000802135.1_ASM80213v1_genomic.gff	MAG	1531958	Desulfosporosinus sp. BICA1-9	Desulfosporosinus sp. BICA1-9	Desulfosporosinus	Peptococcaceae	Clostridiales	Clostridia	Firmicutes	Bacteria	JUEE01000072.1	KJS89107.1	D	D-1	JL57_09185	>JL57_09185(COG1151)
GCA_000816945.1_ASM81694v1_genomic.gff	-	1408285	Clostridium botulinum CDC_297	Clostridium botulinum	Clostridium	Clostridiaceae	Clostridiales	Clostridia	Firmicutes	Bacteria	CP006907.1	AJD26544.1	D	D-1	T257_3234	>T257_3234(COG1151)	>T257_3235(COG1063)
GCA_000816945.1_ASM81694v1_genomic.gff	-	1408285	Clostridium botulinum CDC_297	Clostridium botulinum	Clostridium	Clostridiaceae	Clostridiales	Clostridia	Firmicutes	Bacteria	CP006907.1	AJD26814.1	C	C-1	T257_403	<T257_401(COG1251)	<T257_402(COG0437)	<T257_403(COG1151)	<T257_404(COG1959)	<T257_405	<T257_406	<T257_407	<T257_408(COG0020)
GCA_000944695.1_assembly_v1_genomic.gff	-	49338	Desulfitobacterium hafniense	Desulfitobacterium hafniense	Desulfitobacterium	Peptococcaceae	Clostridiales	Clostridia	Firmicutes	Bacteria	LK996017.1	CDX01706.1	F	F-1	DPCES_1819	<DPCES_1813(COG1410)	<DPCES_1814(COG2069)	<DPCES_1815(COG3640)	<DPCES_1816(COG3894)	<DPCES_1817(COG1456)	<DPCES_1818(COG1614)	<DPCES_1819(COG1151)	<DPCES_1820(COG3640)
GCA_000944695.1_assembly_v1_genomic.gff	-	49338	Desulfitobacterium hafniense	Desulfitobacterium hafniense	Desulfitobacterium	Peptococcaceae	Clostridiales	Clostridia	Firmicutes	Bacteria	LK996017.1	CDX04401.1	D	D-1	DPCES_4515	<DPCES_4511	<DPCES_4512	<DPCES_4513(COG2846)	<DPCES_4514(COG0664)	<DPCES_4515(COG1151)
GCA_000960725.1_ASM96072v1_genomic.gff	MAG	1609970	Candidatus Magnetoovum chiemensis	Candidatus Magnetoovum chiemensis	Candidatus Magnetoovum	Nitrospiraceae	Nitrospirales	Nitrospira	Nitrospirae	Bacteria	JZJI01000682.1	KJR41450.1	E	E-1	MCHI_002645	<MCHI_002638(COG1198)	<MCHI_002639(COG3296)	<MCHI_002640(COG1838)	<MCHI_002641(COG1034)	<MCHI_002642(COG1894)	<MCHI_002643(COG1894)	<MCHI_002644(COG1905)	<MCHI_002645(COG1151)	<MCHI_002646(COG1614)	<MCHI_002647(COG1456)	<MCHI_002648(COG2069)	<MCHI_002649(COG1410)	<MCHI_002650(COG1197)	<MCHI_002651(COG5397)	<MCHI_002652(COG2870)	<MCHI_002653(COG0471)	<MCHI_002654(COG2204)	<MCHI_002655(COG2204)	<MCHI_002656	<MCHI_002657(COG2204)	<MCHI_002658(COG0642)	<MCHI_002659(COG2204)
GCA_000961575.1_41k_genomic.gff	MAG	1629715	Peptococcaceae bacterium BRH_c8a	Peptococcaceae bacterium BRH_c8a	unclassified Peptococcaceae	Peptococcaceae	Clostridiales	Clostridia	Firmicutes	Bacteria	LADP01000004.1	KJS14029.1	F	F-1	VR67_01790	>VR67_01785(COG3640)	>VR67_01790(COG1151)	>VR67_01795(COG1614)
GCA_000961575.1_41k_genomic.gff	MAG	1629715	Peptococcaceae bacterium BRH_c8a	Peptococcaceae bacterium BRH_c8a	unclassified Peptococcaceae	Peptococcaceae	Clostridiales	Clostridia	Firmicutes	Bacteria	LADP01000018.1	KJS12984.1	F	F-1	VR67_07435	>VR67_07435(COG1151)	>VR67_07440(COG1142)
GCA_000961575.1_41k_genomic.gff	MAG	1629715	Peptococcaceae bacterium BRH_c8a	Peptococcaceae bacterium BRH_c8a	unclassified Peptococcaceae	Peptococcaceae	Clostridiales	Clostridia	Firmicutes	Bacteria	LADP01000042.1	KJS10564.1	F	F-1	VR67_16745	<VR67_16740(COG1614)	<VR67_16745(COG1151)
GCA_000961585.1_41k_genomic.gff	MAG	1629716	Peptococcaceae bacterium BRH_c4a	Peptococcaceae bacterium BRH_c4a	unclassified Peptococcaceae	Peptococcaceae	Clostridiales	Clostridia	Firmicutes	Bacteria	LADN01000010.1	KJS03342.1	D	D-3	VR68_01680	<VR68_01670(COG1251)	<VR68_01675(COG1142)	<VR68_01680(COG1151)
GCA_000961585.1_41k_genomic.gff	MAG	1629716	Peptococcaceae bacterium BRH_c4a	Peptococcaceae bacterium BRH_c4a	unclassified Peptococcaceae	Peptococcaceae	Clostridiales	Clostridia	Firmicutes	Bacteria	LADN01000051.1	KJR99896.1	F	F-1	VR68_08000	>VR68_08000(COG1151)	>VR68_08005(COG1614)	>VR68_08010(COG1456)	>VR68_08015(COG3640)	>VR68_08020(COG2069)	>VR68_08025(COG1410)	>VR68_08030	>VR68_08035(COG1148)	>VR68_08045(COG1035)
GCA_000961595.1_41k_genomic.gff	MAG	1629717	Peptococcaceae bacterium BRH_c4b	Peptococcaceae bacterium BRH_c4b	unclassified Peptococcaceae	Peptococcaceae	Clostridiales	Clostridia	Firmicutes	Bacteria	LADO01000017.1	KJS17561.1	C	C-2	VR69_04275	<VR69_04265(COG1251)	<VR69_04270(COG1142)	<VR69_04275(COG1151)	<VR69_04280(COG1959)	<VR69_04285	>VR69_04290(COG0031)
GCA_000961595.1_41k_genomic.gff	MAG	1629717	Peptococcaceae bacterium BRH_c4b	Peptococcaceae bacterium BRH_c4b	unclassified Peptococcaceae	Peptococcaceae	Clostridiales	Clostridia	Firmicutes	Bacteria	LADO01000042.1	KJS16061.1	E	E-1	VR69_10635	<VR69_10635(COG1151)	<VR69_10640(COG1142)	<VR69_10645(COG1251)	>VR69_10655(COG1396)
GCA_000961595.1_41k_genomic.gff	MAG	1629717	Peptococcaceae bacterium BRH_c4b	Peptococcaceae bacterium BRH_c4b	unclassified Peptococcaceae	Peptococcaceae	Clostridiales	Clostridia	Firmicutes	Bacteria	LADO01000052.1	KJS15442.1	F	F-1	VR69_13520	<VR69_13490(COG1148)	<VR69_13495(COG1410)	<VR69_13500(COG2069)	<VR69_13505(COG3640)	<VR69_13510(COG1456)	<VR69_13515(COG1614)	<VR69_13520(COG1151)	<VR69_13525(COG3640)
GCA_000961655.1_41k_genomic.gff	MAG	1629708	Desulfatitalea sp. BRH_c12	Desulfatitalea sp. BRH_c12	Desulfatitalea	Desulfobacteraceae	Desulfobacterales	Deltaproteobacteria	Proteobacteria	Bacteria	LADR01000008.1	KJS33351.1	E	E-1	VR64_00625	<VR64_00605(COG0296)	<VR64_00610(COG1410)	<VR64_00615(COG1456)	<VR64_00620(COG1614)	<VR64_00625(COG1151)	<VR64_00630(COG2069)
GCA_000961655.1_41k_genomic.gff	MAG	1629708	Desulfatitalea sp. BRH_c12	Desulfatitalea sp. BRH_c12	Desulfatitalea	Desulfobacteraceae	Desulfobacterales	Deltaproteobacteria	Proteobacteria	Bacteria	LADR01000065.1	KJS29446.1	E	E-1	VR64_19875	<VR64_19875(COG1151)
GCA_000961725.1_41k_genomic.gff	MAG	1629713	Desulfobulbaceae bacterium BRH_c16a	Desulfobulbaceae bacterium BRH_c16a	unclassified Desulfobulbaceae	Desulfobulbaceae	Desulfobacterales	Deltaproteobacteria	Proteobacteria	Bacteria	LADS01000004.1	KJS03027.1	E	E-2	VR65_01855	<VR65_01835(COG1454)	>VR65_01840	>VR65_01845	>VR65_01850(COG2199)	>VR65_01855(COG1151)	<VR65_01860(COG0664)
GCA_000961725.1_41k_genomic.gff	MAG	1629713	Desulfobulbaceae bacterium BRH_c16a	Desulfobulbaceae bacterium BRH_c16a	unclassified Desulfobulbaceae	Desulfobulbaceae	Desulfobacterales	Deltaproteobacteria	Proteobacteria	Bacteria	LADS01000036.1	KJS00557.1	F	F-1	VR65_12095	>VR65_12080(COG1595)	<VR65_12085(COG1251)	<VR65_12090(COG1142)	<VR65_12095(COG1151)
GCA_000961725.1_41k_genomic.gff	MAG	1629713	Desulfobulbaceae bacterium BRH_c16a	Desulfobulbaceae bacterium BRH_c16a	unclassified Desulfobulbaceae	Desulfobulbaceae	Desulfobacterales	Deltaproteobacteria	Proteobacteria	Bacteria	LADS01000063.1	KJR96963.1	E	E-1	VR65_26380	<VR65_26375	<VR65_26380(COG1151)	<VR65_26385(COG3640)	<VR65_26390	<VR65_26395(COG1410)	<VR65_26400(COG1456)	<VR65_26405(COG1614)	<VR65_26410(COG1151)
GCA_000961725.1_41k_genomic.gff	MAG	1629713	Desulfobulbaceae bacterium BRH_c16a	Desulfobulbaceae bacterium BRH_c16a	unclassified Desulfobulbaceae	Desulfobulbaceae	Desulfobacterales	Deltaproteobacteria	Proteobacteria	Bacteria	LADS01000063.1	KJR96968.1	E	E-1	VR65_26410	Overlapping to the genomic context of VR65_26380
GCA_000961765.1_41k_genomic.gff	MAG	1629719	Clostridiaceae bacterium BRH_c20a	Clostridiaceae bacterium BRH_c20a	unclassified Clostridiaceae	Clostridiaceae	Clostridiales	Clostridia	Firmicutes	Bacteria	LADT01000006.1	KJS23076.1	D	D-1	VR72_02570	>VR72_02565(COG1171)	>VR72_02570(COG1151)	>VR72_02575(COG2113)	>VR72_02580(COG4176)	>VR72_02585(COG4175)	>VR72_02590(COG4992)	>VR72_02595(COG1414)	>VR72_02600(COG2759)	>VR72_02605(COG0436)	>VR72_02610(COG0129)	>VR72_02615(COG3395)	>VR72_02620(COG1995)	>VR72_02625(COG0413)	>VR72_02630(COG2204)	<VR72_02635(COG1309)
GCA_000961765.1_41k_genomic.gff	MAG	1629719	Clostridiaceae bacterium BRH_c20a	Clostridiaceae bacterium BRH_c20a	unclassified Clostridiaceae	Clostridiaceae	Clostridiales	Clostridia	Firmicutes	Bacteria	LADT01000088.1	KJS18892.1	D	others	VR72_20595	<VR72_20595(COG1151)	<VR72_20600(COG1251)	<VR72_20605(COG1142)
GCA_000961765.1_41k_genomic.gff	MAG	1629719	Clostridiaceae bacterium BRH_c20a	Clostridiaceae bacterium BRH_c20a	unclassified Clostridiaceae	Clostridiaceae	Clostridiales	Clostridia	Firmicutes	Bacteria	LADT01000088.1	KJS18910.1	F	F-1	VR72_20690	<VR72_20655(COG0685)	<VR72_20660(COG1410)	<VR72_20665(COG2069)	<VR72_20670(COG3640)	<VR72_20675(COG3894)	<VR72_20680(COG1456)	<VR72_20685(COG1614)	<VR72_20690(COG1151)
GCA_000961805.1_41k_genomic.gff	MAG	1629714	Peptococcaceae bacterium BRH_c23	Peptococcaceae bacterium BRH_c23	unclassified Peptococcaceae	Peptococcaceae	Clostridiales	Clostridia	Firmicutes	Bacteria	LADV01000011.1	KJS50767.1	F	F-1	VR66_01110	<VR66_01105(COG1251)	<VR66_01110(COG1151)	<VR66_01115(COG1142)	<VR66_01120(COG0664)
GCA_000961805.1_41k_genomic.gff	MAG	1629714	Peptococcaceae bacterium BRH_c23	Peptococcaceae bacterium BRH_c23	unclassified Peptococcaceae	Peptococcaceae	Clostridiales	Clostridia	Firmicutes	Bacteria	LADV01000185.1	KJS48142.1	F	F-1	VR66_15630	>VR66_15625(COG3640)	>VR66_15630(COG1151)	>VR66_15635(COG1614)	>VR66_15640(COG1456)	>VR66_15645(COG3894)	>VR66_15650(COG3640)	>VR66_15655(COG2069)	>VR66_15660(COG1410)	>VR66_15665	>VR66_15670(COG4585)	>VR66_15675(COG2197)	>VR66_15680(COG1236)
GCA_000963235.1_ASM96323v1_genomic.gff	MAG	29290	Candidatus Magnetobacterium bavaricum	Candidatus Magnetobacterium bavaricum	Candidatus Magnetobacterium	Nitrospiraceae	Nitrospirales	Nitrospira	Nitrospirae	Bacteria	LACI01000232.1	KJU87304.1	F	F-1	MBAV_000496	<MBAV_000496(COG1151)	<MBAV_000497(COG0797)	<MBAV_000498(COG1220)	<MBAV_000499(COG5405)	<MBAV_000500	<MBAV_000501	<MBAV_000502
GCA_000963235.1_ASM96323v1_genomic.gff	MAG	29290	Candidatus Magnetobacterium bavaricum	Candidatus Magnetobacterium bavaricum	Candidatus Magnetobacterium	Nitrospiraceae	Nitrospirales	Nitrospira	Nitrospirae	Bacteria	LACI01000998.1	KJU85495.1	E	E-1	MBAV_002306	<MBAV_002306(COG1151)	<MBAV_002307(COG1614)	<MBAV_002308(COG1456)	<MBAV_002309(COG2069)	<MBAV_002310(COG1410)
GCA_000969925.1_ASM96992v1_genomic.gff	-	1434121	Methanosarcina thermophila CHTI-55	Methanosarcina thermophila	Methanosarcina	Methanosarcinaceae	Methanosarcinales	Methanomicrobia	Euryarchaeota	Archaea	CP009502.1	AKB15258.1	A	A-1	MSTHC_0940	>MSTHC_0940(COG1152)	>MSTHC_0941(COG1880)	>MSTHC_0942(COG1614)	>MSTHC_0943(COG3640)	>MSTHC_0944(COG2069)	>MSTHC_0945(COG1456)
GCA_000970125.1_ASM97012v1_genomic.gff	-	1434119	Methanosarcina siciliae HI350	Methanosarcina siciliae	Methanosarcina	Methanosarcinaceae	Methanosarcinales	Methanomicrobia	Euryarchaeota	Archaea	CP009507.1	AKB31576.1	D	D-1	MSSIH_0886	>MSSIH_0886(COG1151)
GCA_000970125.1_ASM97012v1_genomic.gff	-	1434119	Methanosarcina siciliae HI350	Methanosarcina siciliae	Methanosarcina	Methanosarcinaceae	Methanosarcinales	Methanomicrobia	Euryarchaeota	Archaea	CP009507.1	AKB33672.1	A	A-1	MSSIH_2982	>MSSIH_2982(COG1152)	>MSSIH_2983(COG1880)	>MSSIH_2984(COG1614)	>MSSIH_2985(COG3640)	>MSSIH_2986	>MSSIH_2987(COG2069)	>MSSIH_2988(COG1456)
GCA_000970125.1_ASM97012v1_genomic.gff	-	1434119	Methanosarcina siciliae HI350	Methanosarcina siciliae	Methanosarcina	Methanosarcinaceae	Methanosarcinales	Methanomicrobia	Euryarchaeota	Archaea	CP009507.1	AKB33827.1	A	A-1	MSSIH_3137	>MSSIH_3137(COG1152)	>MSSIH_3138(COG1880)	>MSSIH_3139(COG1614)	>MSSIH_3140(COG3640)	>MSSIH_3141(COG2069)	>MSSIH_3142(COG1456)	>MSSIH_3143(COG0463)
GCA_000987045.1_ASM98704v1_genomic.gff	MAG	1605376	Clostridiales bacterium PH28_bin88	Clostridiales bacterium PH28_bin88	unclassified Clostridiales	unclassified Clostridiales	Clostridiales	Clostridia	Firmicutes	Bacteria	LAKY01000020.1	KKM12083.1	D	D-3	SY88_05410	<SY88_05400(COG1251)	<SY88_05405(COG1142)	<SY88_05410(COG1151)	<SY88_05415(COG1251)	<SY88_05420	<SY88_05425(COG0348)	<SY88_05430
GCA_000987045.1_ASM98704v1_genomic.gff	MAG	1605376	Clostridiales bacterium PH28_bin88	Clostridiales bacterium PH28_bin88	unclassified Clostridiales	unclassified Clostridiales	Clostridiales	Clostridia	Firmicutes	Bacteria	LAKY01000053.1	KKM10287.1	B	B-4	SY88_14625	<SY88_14610(COG1116)	<SY88_14615(COG0600)	<SY88_14625(COG1151)	<SY88_14630(COG0031)
GCA_000987045.1_ASM98704v1_genomic.gff	MAG	1605376	Clostridiales bacterium PH28_bin88	Clostridiales bacterium PH28_bin88	unclassified Clostridiales	unclassified Clostridiales	Clostridiales	Clostridia	Firmicutes	Bacteria	LAKY01000067.1	KKM09281.1	D	D-1	SY88_19885	>SY88_19875(COG2226)	>SY88_19885(COG1151)	>SY88_19890(COG1191)
GCA_000987045.1_ASM98704v1_genomic.gff	MAG	1605376	Clostridiales bacterium PH28_bin88	Clostridiales bacterium PH28_bin88	unclassified Clostridiales	unclassified Clostridiales	Clostridiales	Clostridia	Firmicutes	Bacteria	LAKY01000068.1	KKM09188.1	F	F-1	SY88_20190	<SY88_20125	<SY88_20130(COG0685)	<SY88_20135	<SY88_20140(COG1908)	<SY88_20145(COG0493)	<SY88_20150(COG2048)	<SY88_20155(COG1150)	<SY88_20160(COG1410)	<SY88_20165(COG2069)	<SY88_20170(COG3640)	<SY88_20175(COG3894)	<SY88_20180(COG1456)	<SY88_20185(COG1614)	<SY88_20190(COG1151)
GCA_000987045.1_ASM98704v1_genomic.gff	MAG	1605376	Clostridiales bacterium PH28_bin88	Clostridiales bacterium PH28_bin88	unclassified Clostridiales	unclassified Clostridiales	Clostridiales	Clostridia	Firmicutes	Bacteria	LAKY01000071.1	KKM08958.1	F	F-1	SY88_21130	>SY88_21120(COG0664)	>SY88_21125(COG1142)	>SY88_21130(COG1151)	>SY88_21135(COG1251)
GCA_000987375.1_ASM98737v1_genomic.gff	MAG	380242	Candidatus Brocadia fulgida	Candidatus Brocadia fulgida	Candidatus Brocadia	Candidatus Brocadiaceae	Candidatus Brocadiales	Planctomycetia	Planctomycetes	Bacteria	LAQJ01000232.1	KKO18856.1	E	E-1	BROFUL_02449	<BROFUL_02442(COG1410)	<BROFUL_02443(COG2069)	<BROFUL_02444(COG3640)	<BROFUL_02445(COG3894)	<BROFUL_02446(COG1456)	<BROFUL_02447(COG0740)	<BROFUL_02448(COG1614)	<BROFUL_02449(COG1151)	<BROFUL_02450(COG3640)
GCA_001023455.1_ASM102345v1_genomic.gff	MAG	1172204	Paeniclostridium sordellii 8483	Paeniclostridium sordellii	Paeniclostridium	Peptostreptococcaceae	Clostridiales	Clostridia	Firmicutes	Bacteria	AJXR01000062.1	KLR56189.1	E	E-1	WS9_01492	<WS9_01492(COG1151)	<WS9_01497(COG0280)
GCA_001273335.1_ASM127333v1_genomic.gff	MAG	1685125	miscellaneous Crenarchaeota group-1 archaeon SG8-32-3	miscellaneous Crenarchaeota group-1 archaeon SG8-32-3	unclassified Candidatus Bathyarchaeota	unclassified Candidatus Bathyarchaeota	unclassified Candidatus Bathyarchaeota	unclassified Candidatus Bathyarchaeota	Candidatus Bathyarchaeota	Archaea	LFWV01000009.1	KON32187.1	A	A-1	AC478_01035	<AC478_01015(COG1456)	<AC478_01020(COG2069)	<AC478_01025(COG1614)	<AC478_01030(COG1880)	<AC478_01035(COG1152)
GCA_001273375.1_ASM127337v1_genomic.gff	MAG	1685133	miscellaneous Crenarchaeota group archaeon SMTZ1-55	miscellaneous Crenarchaeota group archaeon SMTZ1-55	unclassified Candidatus Bathyarchaeota	unclassified Candidatus Bathyarchaeota	unclassified Candidatus Bathyarchaeota	unclassified Candidatus Bathyarchaeota	Candidatus Bathyarchaeota	Archaea	LFWX01000011.1	KON30510.1	A	A-1	AC480_00990	<AC480_00960(COG1522)	<AC480_00965(COG3894)	<AC480_00970(COG1456)	<AC480_00975(COG2069)	<AC480_00980(COG1614)	<AC480_00985(COG1880)	<AC480_00990(COG1152)
GCA_001273385.1_ASM127338v1_genomic.gff	MAG	1685126	miscellaneous Crenarchaeota group-6 archaeon AD8-1	miscellaneous Crenarchaeota group-6 archaeon AD8-1	unclassified Candidatus Bathyarchaeota	unclassified Candidatus Bathyarchaeota	unclassified Candidatus Bathyarchaeota	unclassified Candidatus Bathyarchaeota	Candidatus Bathyarchaeota	Archaea	LFWW01000002.1	KON34459.1	A	A-1	AC479_00620	<AC479_00600(COG1456)	<AC479_00605(COG2069)	<AC479_00610(COG1614)	<AC479_00615(COG1880)	<AC479_00620(COG1152)	<AC479_00625(COG3640)	<AC479_00630(COG3640)
GCA_001273415.1_ASM127341v1_genomic.gff	MAG	1685127	miscellaneous Crenarchaeota group-15 archaeon DG-45	miscellaneous Crenarchaeota group-15 archaeon DG-45	unclassified Candidatus Bathyarchaeota	unclassified Candidatus Bathyarchaeota	unclassified Candidatus Bathyarchaeota	unclassified Candidatus Bathyarchaeota	Candidatus Bathyarchaeota	Archaea	LFWZ01000025.1	KON30654.1	A	A-1	AC482_03375	<AC482_03355(COG0685)	>AC482_03360(COG3894)	>AC482_03365(COG2905)	>AC482_03370(COG3631)	>AC482_03375(COG1152)	>AC482_03380(COG1880)	>AC482_03390(COG1456)
GCA_001292585.1_SAG5_genomic.gff	MAG	1509431	Candidatus Magnetomorum sp. HK-1	Candidatus Magnetomorum sp. HK-1	Candidatus Magnetomorum	Desulfobacteraceae	Desulfobacterales	Deltaproteobacteria	Proteobacteria	Bacteria	JPDT01000365.1	KPA18457.1	E	E-1	MHK_001279	<MHK_001274	<MHK_001275(COG0642)	<MHK_001276(COG1879)	<MHK_001277(COG1516)	<MHK_001278	<MHK_001279(COG1151)	<MHK_001280(COG0776)
GCA_001302675.1_ASM130267v1_genomic.gff	MAG	1703413	Planctomycetes bacterium DG_20	Planctomycetes bacterium DG_20	unclassified Planctomycetes	unclassified Planctomycetes	unclassified Planctomycetes	unclassified Planctomycetes	Planctomycetes	Bacteria	LIZP01000080.1	KPJ75001.1	E	E-3	AMS14_04440	<AMS14_04430(COG2759)	>AMS14_04435(COG3640)	>AMS14_04440(COG1151)	>AMS14_04445(COG1614)	>AMS14_04450(COG1456)
GCA_001302825.1_ASM130282v1_genomic.gff	MAG	1703414	Planctomycetes bacterium DG_23	Planctomycetes bacterium DG_23	unclassified Planctomycetes	unclassified Planctomycetes	unclassified Planctomycetes	unclassified Planctomycetes	Planctomycetes	Bacteria	LIZR01000109.1	KPJ58813.1	E	E-1	AMS15_07605	>AMS15_07600(COG3640)	>AMS15_07605(COG1151)	>AMS15_07610(COG1614)
GCA_001302885.1_ASM130288v1_genomic.gff	MAG	1704237	Spirochaetes bacterium DG_61	Spirochaetes bacterium DG_61	unclassified Spirochaetes	unclassified Spirochaetes	unclassified Spirochaetes	unclassified Spirochaetes	Spirochaetes	Bacteria	LJNB01000014.1	KPJ89503.1	E	E-1	AMS17_01615	<AMS17_01605(COG1905)	<AMS17_01610(COG0437)	<AMS17_01615(COG1151)	<AMS17_01620(COG3640)	<AMS17_01625(COG0432)	<AMS17_01630	<AMS17_01635(COG0568)
GCA_001302885.1_ASM130288v1_genomic.gff	MAG	1704237	Spirochaetes bacterium DG_61	Spirochaetes bacterium DG_61	unclassified Spirochaetes	unclassified Spirochaetes	unclassified Spirochaetes	unclassified Spirochaetes	Spirochaetes	Bacteria	LJNB01000038.1	KPJ88820.1	E	E-1	AMS17_04190	<AMS17_04125(COG1410)	<AMS17_04130(COG2069)	<AMS17_04135(COG3640)	<AMS17_04140(COG3894)	<AMS17_04145(COG1456)	<AMS17_04150(COG1614)	<AMS17_04155(COG1034)	<AMS17_04160(COG1894)	<AMS17_04165(COG1905)	<AMS17_04170	<AMS17_04175	<AMS17_04180(COG1905)	<AMS17_04185(COG0437)	<AMS17_04190(COG1151)	<AMS17_04195(COG3640)
GCA_001302885.1_ASM130288v1_genomic.gff	MAG	1704237	Spirochaetes bacterium DG_61	Spirochaetes bacterium DG_61	unclassified Spirochaetes	unclassified Spirochaetes	unclassified Spirochaetes	unclassified Spirochaetes	Spirochaetes	Bacteria	LJNB01000104.1	KPJ87388.1	E	E-1	AMS17_08640	>AMS17_08640(COG1151)	>AMS17_08645(COG0437)	>AMS17_08650(COG1905)	>AMS17_08655	>AMS17_08660	>AMS17_08665(COG1905)	>AMS17_08670(COG1894)	>AMS17_08675(COG1034)	>AMS17_08680(COG1614)
GCA_001302885.1_ASM130288v1_genomic.gff	MAG	1704237	Spirochaetes bacterium DG_61	Spirochaetes bacterium DG_61	unclassified Spirochaetes	unclassified Spirochaetes	unclassified Spirochaetes	unclassified Spirochaetes	Spirochaetes	Bacteria	LJNB01000183.1	KPJ86381.1	E	E-1	AMS17_12660	>AMS17_12655(COG3640)	>AMS17_12660(COG1151)	>AMS17_12665(COG0437)	>AMS17_12670(COG1905)	>AMS17_12675(COG1894)	>AMS17_12680(COG1034)	>AMS17_12685(COG1152)
GCA_001303025.1_ASM130302v1_genomic.gff	MAG	1703398	Deltaproteobacteria bacterium SG8_13	Deltaproteobacteria bacterium SG8_13	unclassified Deltaproteobacteria	unclassified Deltaproteobacteria	unclassified Deltaproteobacteria	Deltaproteobacteria	Proteobacteria	Bacteria	LJNK01000002.1	KPJ79069.1	E	E-1	AMJ54_00835	>AMJ54_00835(COG1151)
GCA_001303025.1_ASM130302v1_genomic.gff	MAG	1703398	Deltaproteobacteria bacterium SG8_13	Deltaproteobacteria bacterium SG8_13	unclassified Deltaproteobacteria	unclassified Deltaproteobacteria	unclassified Deltaproteobacteria	Deltaproteobacteria	Proteobacteria	Bacteria	LJNK01000015.1	KPJ78019.1	E	E-1	AMJ54_05465	>AMJ54_05465(COG1151)
GCA_001303205.1_ASM130320v1_genomic.gff	MAG	1704023	Nitrospira bacterium SG8_3	Nitrospira bacterium SG8_3	unclassified Nitrospira	unclassified Nitrospira	unclassified Nitrospira	Nitrospira	Nitrospirae	Bacteria	LJNR01000171.1	KPK26995.1	E	E-1	AMK69_11175	>AMK69_11155(COG1773)	>AMK69_11160	>AMK69_11165(COG0426)	>AMK69_11170	>AMK69_11175(COG1151)	>AMK69_11180(COG1141)
GCA_001303205.1_ASM130320v1_genomic.gff	MAG	1704023	Nitrospira bacterium SG8_3	Nitrospira bacterium SG8_3	unclassified Nitrospira	unclassified Nitrospira	unclassified Nitrospira	Nitrospira	Nitrospirae	Bacteria	LJNR01000594.1	KPK18485.1	E	E-3	AMK69_24825	>AMK69_24815(COG2759)	>AMK69_24820(COG0190)	>AMK69_24825(COG1151)	>AMK69_24830(COG1148)	>AMK69_24835(COG1148)
GCA_001303205.1_ASM130320v1_genomic.gff	MAG	1704023	Nitrospira bacterium SG8_3	Nitrospira bacterium SG8_3	unclassified Nitrospira	unclassified Nitrospira	unclassified Nitrospira	Nitrospira	Nitrospirae	Bacteria	LJNR01000717.1	KPK14387.1	E	E-3	AMK69_28735	<AMK69_28725(COG1148)	<AMK69_28730(COG1148)	<AMK69_28735(COG1151)	<AMK69_28740(COG0190)	<AMK69_28745(COG2759)
GCA_001303285.1_ASM130328v1_genomic.gff	MAG	1703405	Gammaproteobacteria bacterium SG8_31	Gammaproteobacteria bacterium SG8_31	unclassified Gammaproteobacteria	unclassified Gammaproteobacteria	unclassified Gammaproteobacteria	Gammaproteobacteria	Proteobacteria	Bacteria	LJTI01000016.1	KPK59799.1	E	E-2	AMJ59_09160	>AMJ59_09155(COG0437)	>AMJ59_09160(COG1151)	>AMJ59_09170(COG1251)
GCA_001303285.1_ASM130328v1_genomic.gff	MAG	1703405	Gammaproteobacteria bacterium SG8_31	Gammaproteobacteria bacterium SG8_31	unclassified Gammaproteobacteria	unclassified Gammaproteobacteria	unclassified Gammaproteobacteria	Gammaproteobacteria	Proteobacteria	Bacteria	LJTI01000117.1	KPK56471.1	E	E-2	AMJ59_22205	<AMJ59_22195(COG1251)	<AMJ59_22205(COG1151)	<AMJ59_22210(COG0437)
GCA_001303325.1_ASM130332v1_genomic.gff	MAG	1703401	Desulfobacterales bacterium SG8_35_2	Desulfobacterales bacterium SG8_35_2	unclassified Desulfobacterales	unclassified Desulfobacterales	Desulfobacterales	Deltaproteobacteria	Proteobacteria	Bacteria	LJTL01000034.1	KPK27500.1	E	E-3	AMJ61_05540	>AMJ61_05535(COG0190)	>AMJ61_05540(COG1151)	>AMJ61_05550(COG2069)	>AMJ61_05555(COG1614)	>AMJ61_05560(COG1456)	>AMJ61_05565(COG1148)	>AMJ61_05570(COG1148)
GCA_001303345.1_ASM130334v1_genomic.gff	MAG	1703400	Desulfobacterales bacterium SG8_35	Desulfobacterales bacterium SG8_35	unclassified Desulfobacterales	unclassified Desulfobacterales	Desulfobacterales	Deltaproteobacteria	Proteobacteria	Bacteria	LJTJ01000054.1	KPJ99241.1	E	E-2	AMJ60_05710	<AMJ60_05710(COG1151)	<AMJ60_05715(COG0475)
GCA_001303345.1_ASM130334v1_genomic.gff	MAG	1703400	Desulfobacterales bacterium SG8_35	Desulfobacterales bacterium SG8_35	unclassified Desulfobacterales	unclassified Desulfobacterales	Desulfobacterales	Deltaproteobacteria	Proteobacteria	Bacteria	LJTJ01000187.1	KPJ97326.1	E	E-3	AMJ60_11745	<AMJ60_11745(COG1151)	<AMJ60_11750(COG0190)
GCA_001303405.1_ASM130340v1_genomic.gff	MAG	1704025	Nitrospira bacterium SG8_35_4	Nitrospira bacterium SG8_35_4	unclassified Nitrospira	unclassified Nitrospira	unclassified Nitrospira	Nitrospira	Nitrospirae	Bacteria	LJTM01000254.1	KPJ97998.1	F	others	AMK71_12140	<AMK71_12140(COG1151)
GCA_001303415.1_ASM130341v1_genomic.gff	MAG	1703407	Myxococcales bacterium SG8_38	Myxococcales bacterium SG8_38	unclassified Myxococcales	unclassified Myxococcales	Myxococcales	Deltaproteobacteria	Proteobacteria	Bacteria	LJTN01000014.1	KPK16481.1	E	E-2	AMJ62_05235	>AMJ62_05220(COG0778)	>AMJ62_05225(COG1881)	>AMJ62_05230(COG0437)	>AMJ62_05235(COG1151)	>AMJ62_05240(COG3640)	>AMJ62_05245(COG1251)
GCA_001303465.1_ASM130346v1_genomic.gff	MAG	1703409	Phycisphaerae bacterium SG8_4	Phycisphaerae bacterium SG8_4	unclassified Phycisphaerae	unclassified Phycisphaerae	unclassified Phycisphaerae	Phycisphaerae	Planctomycetes	Bacteria	LJTR01000421.1	KPK35117.1	E	E-1	AMJ65_17595	>AMJ65_17595(COG1151)	>AMJ65_17600(COG1614)	>AMJ65_17605(COG1456)
GCA_001303605.1_ASM130360v1_genomic.gff	MAG	1704028	Planctomycetes bacterium SM23_25	Planctomycetes bacterium SM23_25	unclassified Planctomycetes	unclassified Planctomycetes	unclassified Planctomycetes	unclassified Planctomycetes	Planctomycetes	Bacteria	LJTY01000366.1	KPK42541.1	E	E-3	AMK72_14255	<AMK72_14245(COG1456)	<AMK72_14250(COG1614)	<AMK72_14255(COG1151)	<AMK72_14260(COG3640)
GCA_001303695.1_ASM130369v1_genomic.gff	MAG	1703411	Phycisphaerae bacterium SM23_30	Phycisphaerae bacterium SM23_30	unclassified Phycisphaerae	unclassified Phycisphaerae	unclassified Phycisphaerae	Phycisphaerae	Planctomycetes	Bacteria	LJUC01000104.1	KPK75971.1	E	E-1	AMJ79_08925	>AMJ79_08885(COG3640)	>AMJ79_08890(COG0437)	>AMJ79_08895(COG1905)	>AMJ79_08900	>AMJ79_08905	>AMJ79_08910(COG1905)	>AMJ79_08915(COG1894)	>AMJ79_08920(COG1034)	>AMJ79_08925(COG1151)	>AMJ79_08930(COG1614)
GCA_001303745.1_ASM130374v1_genomic.gff	MAG	1704026	Nitrospira bacterium SM23_35	Nitrospira bacterium SM23_35	unclassified Nitrospira	unclassified Nitrospira	unclassified Nitrospira	Nitrospira	Nitrospirae	Bacteria	LJUG01000052.1	KPK45128.1	E	E-1	AMK74_04085	>AMK74_04080(COG1614)	>AMK74_04085(COG1151)	>AMK74_04090(COG1905)	>AMK74_04100(COG1149)	>AMK74_04105(COG1034)
GCA_001303785.1_ASM130378v1_genomic.gff	MAG	1703779	candidate division WOR_3 bacterium SM23_42	candidate division WOR_3 bacterium SM23_42	unclassified candidate division WOR-3	unclassified candidate division WOR-3	unclassified candidate division WOR-3	unclassified candidate division WOR-3	candidate division WOR-3	Bacteria	LJUJ01000030.1	KPK62642.1	D	D-1	AMJ83_10250	<AMJ83_10235	<AMJ83_10240	<AMJ83_10245(COG1145)	<AMJ83_10250(COG1151)
GCA_001303805.1_ASM130380v1_genomic.gff	MAG	1703780	candidate division WOR_3 bacterium SM23_60	candidate division WOR_3 bacterium SM23_60	unclassified candidate division WOR-3	unclassified candidate division WOR-3	unclassified candidate division WOR-3	unclassified candidate division WOR-3	candidate division WOR-3	Bacteria	LJUO01000059.1	KPK71625.1	D	D-1	AMJ87_07030	>AMJ87_07025(COG1959)	>AMJ87_07030(COG1151)	>AMJ87_07035(COG1145)	>AMJ87_07040
GCA_001303805.1_ASM130380v1_genomic.gff	MAG	1703780	candidate division WOR_3 bacterium SM23_60	candidate division WOR_3 bacterium SM23_60	unclassified candidate division WOR-3	unclassified candidate division WOR-3	unclassified candidate division WOR-3	unclassified candidate division WOR-3	candidate division WOR-3	Bacteria	LJUO01000131.1	KPK69307.1	D	D-1	AMJ87_10705	<AMJ87_10690	<AMJ87_10695(COG0011)	<AMJ87_10700(COG1145)	<AMJ87_10705(COG1151)	<AMJ87_10710(COG1959)
GCA_001303805.1_ASM130380v1_genomic.gff	MAG	1703780	candidate division WOR_3 bacterium SM23_60	candidate division WOR_3 bacterium SM23_60	unclassified candidate division WOR-3	unclassified candidate division WOR-3	unclassified candidate division WOR-3	unclassified candidate division WOR-3	candidate division WOR-3	Bacteria	LJUO01000210.1	KPK67615.1	D	D-1	AMJ87_13090	>AMJ87_13085(COG1959)	>AMJ87_13090(COG1151)	>AMJ87_13095(COG1145)	>AMJ87_13100(COG0011)
GCA_001303965.1_ASM130396v1_genomic.gff	MAG	1703387	Anaerolineae bacterium SM23_ 63	Anaerolineae bacterium SM23_ 63	unclassified Anaerolineae	unclassified Anaerolineae	unclassified Anaerolineae	Anaerolineae	Chloroflexi	Bacteria	LJUS01000012.1	KPK94035.1	E	E-1	AMJ88_05970	>AMJ88_05960(COG1810)	>AMJ88_05965	>AMJ88_05970(COG1151)	>AMJ88_05975(COG1614)	>AMJ88_05980(COG2069)	>AMJ88_05985(COG1456)	>AMJ88_05990(COG3894)	>AMJ88_05995(COG3640)
GCA_001304105.1_ASM130410v1_genomic.gff	MAG	1703399	Deltaproteobacteria bacterium SM23_61	Deltaproteobacteria bacterium SM23_61	unclassified Deltaproteobacteria	unclassified Deltaproteobacteria	unclassified Deltaproteobacteria	Deltaproteobacteria	Proteobacteria	Bacteria	LJUR01000023.1	KPK93004.1	E	E-1	AMJ94_03855	>AMJ94_03835(COG2721)	>AMJ94_03840(COG2721)	>AMJ94_03845(COG0451)	>AMJ94_03850(COG1433)	>AMJ94_03855(COG1151)	>AMJ94_03860	>AMJ94_03865(COG0731)	>AMJ94_03870(COG1080)	>AMJ94_03875(COG3640)	>AMJ94_03880	>AMJ94_03885(COG0822)	>AMJ94_03895(COG0685)	>AMJ94_03900(COG0484)
GCA_001304105.1_ASM130410v1_genomic.gff	MAG	1703399	Deltaproteobacteria bacterium SM23_61	Deltaproteobacteria bacterium SM23_61	unclassified Deltaproteobacteria	unclassified Deltaproteobacteria	unclassified Deltaproteobacteria	Deltaproteobacteria	Proteobacteria	Bacteria	LJUR01000035.1	KPK92297.1	E	E-1	AMJ94_05435	>AMJ94_05410(COG0685)	>AMJ94_05415(COG3894)	>AMJ94_05420(COG3640)	>AMJ94_05425	>AMJ94_05430(COG2069)	>AMJ94_05435(COG1151)	>AMJ94_05440(COG1614)	>AMJ94_05445(COG1456)	>AMJ94_05450(COG1410)	>AMJ94_05460(COG3640)
GCA_001304135.1_ASM130413v1_genomic.gff	MAG	1703777	Omnitrophica WOR_2 bacterium SM23_72	Omnitrophica WOR_2 bacterium SM23_72	unclassified Candidatus Omnitrophica	unclassified Candidatus Omnitrophica	unclassified Candidatus Omnitrophica	unclassified Candidatus Omnitrophica	Candidatus Omnitrophica	Bacteria	LJUU01000024.1	KPK97898.1	E	E-1	AMJ95_06825	<AMJ95_06755(COG0484)	<AMJ95_06760(COG0011)	<AMJ95_06765(COG3118)	<AMJ95_06770(COG0375)	<AMJ95_06775	<AMJ95_06780(COG1237)	<AMJ95_06785(COG1833)	<AMJ95_06790(COG1959)	<AMJ95_06795(COG1573)	<AMJ95_06800(COG1237)	<AMJ95_06810(COG0242)	<AMJ95_06815(COG1578)	<AMJ95_06820(COG0853)	<AMJ95_06825(COG1151)
GCA_001304135.1_ASM130413v1_genomic.gff	MAG	1703777	Omnitrophica WOR_2 bacterium SM23_72	Omnitrophica WOR_2 bacterium SM23_72	unclassified Candidatus Omnitrophica	unclassified Candidatus Omnitrophica	unclassified Candidatus Omnitrophica	unclassified Candidatus Omnitrophica	Candidatus Omnitrophica	Bacteria	LJUU01000029.1	KPK97685.1	E	E-1	AMJ95_07790	>AMJ95_07765(COG2759)	>AMJ95_07775(COG0190)	>AMJ95_07780	>AMJ95_07785(COG0685)	>AMJ95_07790(COG1151)	>AMJ95_07795(COG1142)	>AMJ95_07800(COG1251)	>AMJ95_07805(COG1614)	>AMJ95_07810	>AMJ95_07815(COG0749)	>AMJ95_07820(COG0297)	>AMJ95_07825(COG0237)	>AMJ95_07830(COG1158)	>AMJ95_07835(COG0254)	>AMJ95_07840(COG0216)
GCA_001304135.1_ASM130413v1_genomic.gff	MAG	1703777	Omnitrophica WOR_2 bacterium SM23_72	Omnitrophica WOR_2 bacterium SM23_72	unclassified Candidatus Omnitrophica	unclassified Candidatus Omnitrophica	unclassified Candidatus Omnitrophica	unclassified Candidatus Omnitrophica	Candidatus Omnitrophica	Bacteria	LJUU01000037.1	KPK97464.1	E	E-1	AMJ95_08890	<AMJ95_08825(COG0512)	<AMJ95_08830(COG0766)	<AMJ95_08835(COG2890)	<AMJ95_08840(COG0216)	<AMJ95_08845(COG0254)	<AMJ95_08850(COG1158)	<AMJ95_08855(COG0237)	<AMJ95_08860(COG0297)	<AMJ95_08865(COG0749)	<AMJ95_08870(COG5010)	<AMJ95_08875(COG1614)	<AMJ95_08880(COG1251)	<AMJ95_08885(COG1142)	<AMJ95_08890(COG1151)	<AMJ95_08895(COG0685)	<AMJ95_08900	<AMJ95_08905(COG0190)	<AMJ95_08915(COG2759)
GCA_001304175.1_ASM130417v1_genomic.gff	MAG	1703388	Anaerolineae bacterium SM23_84	Anaerolineae bacterium SM23_84	unclassified Anaerolineae	unclassified Anaerolineae	unclassified Anaerolineae	Anaerolineae	Chloroflexi	Bacteria	LJUZ01000008.1	KPL24948.1	E	E-1	AMJ93_01330	<AMJ93_01315(COG1456)	<AMJ93_01320(COG2069)	<AMJ93_01325(COG1614)	<AMJ93_01330(COG1151)	<AMJ93_01335(COG2608)	<AMJ93_01340(COG2759)	<AMJ93_01345(COG0190)	<AMJ93_01350(COG3404)
GCA_001304275.1_ASM130427v1_genomic.gff	MAG	1703410	Phycisphaerae bacterium SM1_79	Phycisphaerae bacterium SM1_79	unclassified Phycisphaerae	unclassified Phycisphaerae	unclassified Phycisphaerae	Phycisphaerae	Planctomycetes	Bacteria	LJVF01000029.1	KPL24095.1	E	E-1	AMJ75_04550	>AMJ75_04510(COG3640)	>AMJ75_04515(COG0437)	>AMJ75_04520(COG1905)	>AMJ75_04525	>AMJ75_04530	>AMJ75_04535(COG1905)	>AMJ75_04540(COG1894)	>AMJ75_04545(COG1034)	>AMJ75_04550(COG1151)	>AMJ75_04555(COG1614)	>AMJ75_04560(COG1456)	>AMJ75_04565(COG3894)	>AMJ75_04570	>AMJ75_04575(COG3640)	>AMJ75_04580(COG2069)	>AMJ75_04585(COG1410)	>AMJ75_04590(COG2759)
GCA_001304295.1_ASM130429v1_genomic.gff	MAG	1704030	Planctomycetes bacterium SM23_65	Planctomycetes bacterium SM23_65	unclassified Planctomycetes	unclassified Planctomycetes	unclassified Planctomycetes	unclassified Planctomycetes	Planctomycetes	Bacteria	LJUT01000127.1	KPL00363.1	E	E-1	AMK75_05555	>AMK75_05550(COG1034)	>AMK75_05555(COG1151)	>AMK75_05560(COG1614)	>AMK75_05565(COG1456)	>AMK75_05570(COG3894)
GCA_001304355.1_ASM130435v1_genomic.gff	MAG	1703415	Planctomycetes bacterium DG_58	Planctomycetes bacterium DG_58	unclassified Planctomycetes	unclassified Planctomycetes	unclassified Planctomycetes	unclassified Planctomycetes	Planctomycetes	Bacteria	LJMZ01000184.1	KPJ52187.1	E	E-1	AMS16_06740	<AMS16_06735(COG1614)	<AMS16_06740(COG1151)	<AMS16_06745(COG1034)	<AMS16_06750(COG1894)
GCA_001317315.1_ASM131731v1_genomic.gff	MAG	1719120	Candidatus Methanoperedens sp. BLZ1	Candidatus Methanoperedens sp. BLZ1	Candidatus Methanoperedens	Candidatus Methanoperedenaceae	Methanosarcinales	Methanomicrobia	Euryarchaeota	Archaea	LKCM01000140.1	KPQ43483.1	D	D-1	MPEBLZ_01949	<MPEBLZ_01947(COG1149)	>MPEBLZ_01948(COG1522)	>MPEBLZ_01949(COG1151)	>MPEBLZ_01950	>MPEBLZ_01951(COG3448)	>MPEBLZ_01952(COG3448)	>MPEBLZ_01953(COG1141)
GCA_001399795.1_ASM139979v1_genomic.gff	MAG	1700836	Candidatus Bathyarchaeota archaeon BA2	Candidatus Bathyarchaeota archaeon BA2	unclassified Candidatus Bathyarchaeota	unclassified Candidatus Bathyarchaeota	unclassified Candidatus Bathyarchaeota	unclassified Candidatus Bathyarchaeota	Candidatus Bathyarchaeota	Archaea	LIHK01000052.1	KPV62189.1	A	A-1	AOA66_1428	>AOA66_1428(COG1152)	>AOA66_1429(COG1880)	>AOA66_1430(COG1614)	>AOA66_1431(COG2069)	>AOA66_1432(COG1456)
GCA_001399805.1_ASM139980v1_genomic.gff	MAG	1700835	Candidatus Bathyarchaeota archaeon BA1	Candidatus Bathyarchaeota archaeon BA1	unclassified Candidatus Bathyarchaeota	unclassified Candidatus Bathyarchaeota	unclassified Candidatus Bathyarchaeota	unclassified Candidatus Bathyarchaeota	Candidatus Bathyarchaeota	Archaea	LIHJ01000021.1	KPV65085.1	A	A-1	AOA65_0464	<AOA65_0464(COG1152)	<AOA65_0465(COG0525)
GCA_001399805.1_ASM139980v1_genomic.gff	MAG	1700835	Candidatus Bathyarchaeota archaeon BA1	Candidatus Bathyarchaeota archaeon BA1	unclassified Candidatus Bathyarchaeota	unclassified Candidatus Bathyarchaeota	unclassified Candidatus Bathyarchaeota	unclassified Candidatus Bathyarchaeota	Candidatus Bathyarchaeota	Archaea	LIHJ01000072.1	KPV62667.1	E	E-1	AOA65_1716	<AOA65_1713	<AOA65_1714(COG3640)	<AOA65_1715(COG1908)	<AOA65_1716(COG1151)	<AOA65_1717	<AOA65_1718(COG1908)	<AOA65_1719(COG1148)	<AOA65_1720(COG0493)	<AOA65_1721(COG0247)	<AOA65_1722(COG3259)	<AOA65_1723(COG1941)
GCA_001402855.1_ASM140285v1_genomic.gff	MAG	1653396	Methanosarcina sp. 795	Methanosarcina sp. 795	Methanosarcina	Methanosarcinaceae	Methanosarcinales	Methanomicrobia	Euryarchaeota	Archaea	CP011449.1	ALK05317.1	A	A-1	AAY43_05885	<AAY43_05860(COG1456)	<AAY43_05865(COG2069)	<AAY43_05870(COG3640)	<AAY43_05875(COG1614)	<AAY43_05880(COG1880)	<AAY43_05885(COG1152)
GCA_001412355.1_ASM141235v1_genomic.gff	MAG	1735326	Methanoculleus sp. SDB	Methanoculleus sp. SDB	Methanoculleus	Methanomicrobiaceae	Methanomicrobiales	Methanomicrobia	Euryarchaeota	Archaea	LKUD01000089.1	KQC03420.1	E	E-2	APR53_05595	>APR53_05580(COG0628)	<APR53_05590(COG3640)	<APR53_05595(COG1151)
GCA_001412415.1_ASM141241v1_genomic.gff	MAG	1735328	Methanosaeta sp. SDB	Methanosaeta sp. SDB	Methanothrix	Methanosaetaceae	Methanosarcinales	Methanomicrobia	Euryarchaeota	Archaea	LKUG01000547.1	KQC15557.1	F	others	APR56_13840	<APR56_13830(COG0493)	<APR56_13835(COG0543)	<APR56_13840(COG1151)
GCA_001421175.1_ASM142117v1_genomic.gff	MAG	1713725	Methanomassiliicoccales archaeon RumEn M2	Methanomassiliicoccales archaeon RumEn M2	unclassified Methanomassiliicoccales	unclassified Methanomassiliicoccales	Methanomassiliicoccales	Thermoplasmata	Euryarchaeota	Archaea	LJKL01000016.1	KQM09953.1	E	E-2	AOA81_06000	>AOA81_05990	>AOA81_05995(COG3640)	>AOA81_06000(COG1151)
GCA_001421185.1_ASM142118v1_genomic.gff	MAG	1713724	Methanomassiliicoccales archaeon RumEn M1	Methanomassiliicoccales archaeon RumEn M1	unclassified Methanomassiliicoccales	unclassified Methanomassiliicoccales	Methanomassiliicoccales	Thermoplasmata	Euryarchaeota	Archaea	LJKK01000137.1	KQM11260.1	E	E-2	AOA80_09460	<AOA80_09460(COG1151)	<AOA80_09465(COG3640)	<AOA80_09470	<AOA80_09475(COG0640)
GCA_001443485.1_ASM144348v1_genomic.gff	MAG	1640515	Armatimonadetes bacterium CSP1-3	Armatimonadetes bacterium CSP1-3	unclassified Armatimonadetes	unclassified Armatimonadetes	unclassified Armatimonadetes	unclassified Armatimonadetes	Armatimonadetes	Bacteria	LDXQ01000006.1	KRT77735.1	E	E-1	XU14_C0006G0029	>XU14_C0006G0014	>XU14_C0006G0015(COG2197)	>XU14_C0006G0016	>XU14_C0006G0017	>XU14_C0006G0018	>XU14_C0006G0019(COG2452)	>XU14_C0006G0020	>XU14_C0006G0021(COG1053)	>XU14_C0006G0022(COG2009)	>XU14_C0006G0023	>XU14_C0006G0024(COG0479)	>XU14_C0006G0025(COG1720)	>XU14_C0006G0026(COG1028)	>XU14_C0006G0027(COG1839)	>XU14_C0006G0028(COG3640)	>XU14_C0006G0029(COG1151)	>XU14_C0006G0030(COG1614)	>XU14_C0006G0031(COG1614)	>XU14_C0006G0032(COG1456)	>XU14_C0006G0033(COG3894)	>XU14_C0006G0034(COG3640)	>XU14_C0006G0035	>XU14_C0006G0036(COG2069)	>XU14_C0006G0037(COG1410)	>XU14_C0006G0038(COG2030)	>XU14_C0006G0039(COG0285)	>XU14_C0006G0040	>XU14_C0006G0041(COG2759)	>XU14_C0006G0042(COG0685)	>XU14_C0006G0043(COG0493)	>XU14_C0006G0044(COG1908)	>XU14_C0006G0045(COG2048)	>XU14_C0006G0046(COG3404)	>XU14_C0006G0047(COG0190)
GCA_001508035.1_ASM150803v1_genomic.gff	MAG	1635264	Moorella sp. 60_41	Moorella sp. 60_41	Moorella	Thermoanaerobacteraceae	Thermoanaerobacterales	Clostridia	Firmicutes	Bacteria	LGFA01000011.1	KUK12631.1	F	F-1	XD51_0441	>XD51_0440(COG3640)	>XD51_0441(COG1151)	>XD51_0442(COG1614)	>XD51_0443(COG1456)	>XD51_0444(COG3894)	>XD51_0445(COG3640)	>XD51_0446(COG2069)	>XD51_0447(COG1410)	>XD51_0448(COG1150)	>XD51_0449(COG2048)	>XD51_0450(COG0493)	>XD51_0451(COG1908)	>XD51_0452	>XD51_0453(COG0685)	>XD51_0454
GCA_001508455.1_ASM150845v1_genomic.gff	MAG	1641382	Methanocalculus sp. 52_23	Methanocalculus sp. 52_23	Methanocalculus	Methanocalculaceae	Methanomicrobiales	Methanomicrobia	Euryarchaeota	Archaea	LGGJ01000031.1	KUK70232.1	E	E-2	XD88_0794	<XD88_0793(COG3640)	<XD88_0794(COG1151)
GCA_001508695.1_ASM150869v1_genomic.gff	MAG	1641394	Methanomicrobiales archaeon 53_19	Methanomicrobiales archaeon 53_19	unclassified Methanomicrobiales	unclassified Methanomicrobiales	Methanomicrobiales	Methanomicrobia	Euryarchaeota	Archaea	LGHF01000001.1	KUL05190.1	A	A-1	XE11_0052	>XE11_0049(COG3177)	>XE11_0050(COG5015)	>XE11_0051(COG0491)	>XE11_0052(COG1152)	>XE11_0053(COG1880)	>XE11_0054(COG1614)	>XE11_0055(COG2069)	>XE11_0056(COG1456)	>XE11_0057(COG3894)	>XE11_0058(COG3640)	>XE11_0059(COG1600)
GCA_001508745.1_ASM150874v1_genomic.gff	MAG	2234	Archaeoglobus fulgidus	Archaeoglobus fulgidus	Archaeoglobus	Archaeoglobaceae	Archaeoglobales	Archaeoglobi	Euryarchaeota	Archaea	LGEQ01000001.1	KUJ94763.1	A	A-1	XD40_0084	>XD40_0084(COG1152)	>XD40_0085(COG1880)	>XD40_0086(COG0566)	>XD40_0087(COG1305)	>XD40_0088	>XD40_0089(COG1243)
GCA_001508745.1_ASM150874v1_genomic.gff	MAG	2234	Archaeoglobus fulgidus	Archaeoglobus fulgidus	Archaeoglobus	Archaeoglobaceae	Archaeoglobales	Archaeoglobi	Euryarchaeota	Archaea	LGEQ01000037.1	KUJ93031.1	D	D-1	XD40_1758	>XD40_1758(COG1151)	>XD40_1759(COG0491)	>XD40_1760(COG0247)
GCA_001508855.1_ASM150885v1_genomic.gff	MAG	1635288	Thermoanaerobacterales bacterium 50_218	Thermoanaerobacterales bacterium 50_218	unclassified Thermoanaerobacterales	unclassified Thermoanaerobacterales	Thermoanaerobacterales	Clostridia	Firmicutes	Bacteria	LGFL01000001.1	KUK32696.1	F	F-1	XD63_0065	>XD63_0064(COG3640)	>XD63_0065(COG1151)	>XD63_0066(COG1614)	>XD63_0067(COG1456)	>XD63_0068(COG3640)	>XD63_0069(COG2069)	>XD63_0070(COG1410)	>XD63_0071(COG1908)	>XD63_0072	>XD63_0073(COG0685)	>XD63_0074(COG1148)	>XD63_0075	>XD63_0076(COG0436)	>XD63_0077(COG3935)	>XD63_0078(COG1484)	>XD63_0079(COG0421)	>XD63_0080(COG1541)
GCA_001508855.1_ASM150885v1_genomic.gff	MAG	1635288	Thermoanaerobacterales bacterium 50_218	Thermoanaerobacterales bacterium 50_218	unclassified Thermoanaerobacterales	unclassified Thermoanaerobacterales	Thermoanaerobacterales	Clostridia	Firmicutes	Bacteria	LGFL01000033.1	KUK31566.1	E	E-1	XD63_1186	<XD63_1186(COG1151)	<XD63_1187(COG0437)	<XD63_1188(COG1551)	<XD63_1189(COG1699)	<XD63_1190
GCA_001508995.1_ASM150899v1_genomic.gff	MAG	1641375	Desulfotomaculum sp. 46_80	Desulfotomaculum sp. 46_80	Desulfotomaculum	Peptococcaceae	Clostridiales	Clostridia	Firmicutes	Bacteria	LGGF01000030.1	KUK64384.1	C	C-2	XD84_1517	>XD84_1517(COG1151)	>XD84_1518(COG0437)
GCA_001509005.1_ASM150900v1_genomic.gff	MAG	1641383	Methanobacterium sp. 42_16	Methanobacterium sp. 42_16	Methanobacterium	Methanobacteriaceae	Methanobacteriales	Methanobacteria	Euryarchaeota	Archaea	LGGL01000006.1	KUK75569.1	A	A-1	XD90_0209	<XD90_0203(COG1142)	<XD90_0204(COG1456)	<XD90_0205(COG2069)	<XD90_0206(COG3640)	<XD90_0207(COG1614)	<XD90_0208(COG1880)	<XD90_0209(COG1152)
GCA_001515205.2_ASM151520v2_genomic.gff	MAG	1776334	Hadesarchaea archaeon YNP_45	Hadesarchaea archaeon YNP_45	unclassified Hadesarchaea	unclassified Hadesarchaea	unclassified Hadesarchaea	Hadesarchaea	Euryarchaeota	Archaea	LQMQ01000034.1	KUO40817.1	D	D-1	APZ16_02140	<APZ16_02125(COG2226)	>APZ16_02130(COG0489)	>APZ16_02135(COG2014)	>APZ16_02140(COG1151)
GCA_001515945.1_41k_genomic.gff	MAG	1734395	Desulfitibacter sp. BRH_c19	Desulfitibacter sp. BRH_c19	Desulfitibacter	Peptococcaceae	Clostridiales	Clostridia	Firmicutes	Bacteria	LOER01000016.1	KUO52163.1	F	F-1	APF76_03760	>APF76_03755(COG3640)	>APF76_03760(COG1151)	>APF76_03765(COG1614)	>APF76_03770(COG1456)	>APF76_03775(COG3894)	>APF76_03780(COG3640)	>APF76_03785(COG2069)	>APF76_03790(COG1410)	>APF76_03795(COG0685)
GCA_001515945.1_41k_genomic.gff	MAG	1734395	Desulfitibacter sp. BRH_c19	Desulfitibacter sp. BRH_c19	Desulfitibacter	Peptococcaceae	Clostridiales	Clostridia	Firmicutes	Bacteria	LOER01000034.1	KUO50140.1	D	D-1	APF76_06670	>APF76_06670(COG1151)
GCA_001516045.1_41k_genomic.gff	MAG	1734396	Desulfosporosinus sp. BRH_c37	Desulfosporosinus sp. BRH_c37	Desulfosporosinus	Peptococcaceae	Clostridiales	Clostridia	Firmicutes	Bacteria	LOEW01000299.1	KUO70248.1	D	D-1	APF81_09155	<APF81_09135(COG1410)	<APF81_09140(COG3894)	<APF81_09145(COG2188)	<APF81_09150(COG5012)	<APF81_09155(COG1151)
GCA_001516045.1_41k_genomic.gff	MAG	1734396	Desulfosporosinus sp. BRH_c37	Desulfosporosinus sp. BRH_c37	Desulfosporosinus	Peptococcaceae	Clostridiales	Clostridia	Firmicutes	Bacteria	LOEW01000020.1	KUO78896.1	F	F-1	APF81_18495	>APF81_18490(COG3640)	>APF81_18495(COG1151)	>APF81_18500(COG1614)	>APF81_18505(COG1456)	>APF81_18510(COG3894)	>APF81_18515(COG3640)	>APF81_18520(COG2069)	>APF81_18525(COG1410)	>APF81_18530	>APF81_18535(COG4585)	>APF81_18540(COG2197)	>APF81_18545(COG1236)
GCA_001516045.1_41k_genomic.gff	MAG	1734396	Desulfosporosinus sp. BRH_c37	Desulfosporosinus sp. BRH_c37	Desulfosporosinus	Peptococcaceae	Clostridiales	Clostridia	Firmicutes	Bacteria	LOEW01000156.1	KUO75395.1	F	F-1	APF81_22105	>APF81_22100(COG1142)	>APF81_22105(COG1151)	>APF81_22110(COG1251)	>APF81_22115(COG1600)	>APF81_22120(COG0387)
GCA_001516055.1_41k_genomic.gff	MAG	1734398	Gracilibacter sp. BRH_c7a	Gracilibacter sp. BRH_c7a	Gracilibacter	Gracilibacteraceae	Clostridiales	Clostridia	Firmicutes	Bacteria	LOEZ01000019.1	KUO65845.1	F	F-1	APF84_00900	<APF84_00830(COG0190)	<APF84_00835(COG3404)	<APF84_00840(COG2759)	<APF84_00845(COG3383)	<APF84_00850(COG3383)	<APF84_00855(COG1894)	<APF84_00860(COG1905)	<APF84_00865(COG0685)	<APF84_00870(COG1410)	<APF84_00875(COG2069)	<APF84_00880(COG3640)	<APF84_00885(COG3894)	<APF84_00890(COG1456)	<APF84_00895(COG1614)	<APF84_00900(COG1151)	<APF84_00905(COG3640)	<APF84_00910(COG0685)
GCA_001516055.1_41k_genomic.gff	MAG	1734398	Gracilibacter sp. BRH_c7a	Gracilibacter sp. BRH_c7a	Gracilibacter	Gracilibacteraceae	Clostridiales	Clostridia	Firmicutes	Bacteria	LOEZ01000017.1	KUO66093.1	D	D-1	APF84_12285	>APF84_12270(COG1273)	>APF84_12275(COG1793)	>APF84_12280(COG3285)	>APF84_12285(COG1151)
GCA_001548885.1_SCGC-AAA259A05_genomic.gff	MAG	1698259	candidate divison MSBL1 archaeon SCGC-AAA259A05	candidate divison MSBL1 archaeon SCGC-AAA259A05	unclassified Euryarchaeota	unclassified Euryarchaeota	unclassified Euryarchaeota	unclassified Euryarchaeota	Euryarchaeota	Archaea	LHXJ01000028.1	KXA90963.1	A	A-1	AKJ57_02970	>AKJ57_02970(COG1152)	>AKJ57_02975(COG1880)	>AKJ57_02985(COG2069)	>AKJ57_02990(COG1456)	<AKJ57_02995(COG3640)	<AKJ57_03000(COG3640)	<AKJ57_03005(COG3383)	<AKJ57_03010(COG1894)
GCA_001548935.1_SCGC-AAA259E17_genomic.gff	MAG	1698263	candidate divison MSBL1 archaeon SCGC-AAA259E17	candidate divison MSBL1 archaeon SCGC-AAA259E17	unclassified Euryarchaeota	unclassified Euryarchaeota	unclassified Euryarchaeota	unclassified Euryarchaeota	Euryarchaeota	Archaea	LHXN01000009.1	KXA93303.1	A	A-1	AKJ64_00960	<AKJ64_00955(COG1035)	>AKJ64_00960(COG1152)	>AKJ64_00965(COG1880)	>AKJ64_00980(COG1456)
GCA_001548955.1_SCGC-AAA259E22_genomic.gff	MAG	1698265	candidate divison MSBL1 archaeon SCGC-AAA259E22	candidate divison MSBL1 archaeon SCGC-AAA259E22	unclassified Euryarchaeota	unclassified Euryarchaeota	unclassified Euryarchaeota	unclassified Euryarchaeota	Euryarchaeota	Archaea	LHXP01000013.1	KXA93594.1	E	E-2	AKJ66_01595	<AKJ66_01590(COG1251)	<AKJ66_01595(COG1151)	<AKJ66_01600(COG0437)	>AKJ66_01605(COG1249)
GCA_001548995.1_SCGC-AAA259I09_genomic.gff	MAG	1698267	candidate divison MSBL1 archaeon SCGC-AAA259I09	candidate divison MSBL1 archaeon SCGC-AAA259I09	unclassified Euryarchaeota	unclassified Euryarchaeota	unclassified Euryarchaeota	unclassified Euryarchaeota	Euryarchaeota	Archaea	LHXR01000007.1	KXA98163.1	D	D-1	AKJ37_01080	>AKJ37_01075(COG1141)	<AKJ37_01080(COG1151)	<AKJ37_01095(COG0745)
GCA_001548995.1_SCGC-AAA259I09_genomic.gff	MAG	1698267	candidate divison MSBL1 archaeon SCGC-AAA259I09	candidate divison MSBL1 archaeon SCGC-AAA259I09	unclassified Euryarchaeota	unclassified Euryarchaeota	unclassified Euryarchaeota	unclassified Euryarchaeota	Euryarchaeota	Archaea	LHXR01000017.1	KXA97877.1	E	E-2	AKJ37_02100	<AKJ37_02095(COG1251)	<AKJ37_02100(COG1151)	<AKJ37_02105(COG0437)	>AKJ37_02110(COG1249)
GCA_001549015.1_SCGC-AAA259I14_genomic.gff	MAG	1698268	candidate divison MSBL1 archaeon SCGC-AAA259I14	candidate divison MSBL1 archaeon SCGC-AAA259I14	unclassified Euryarchaeota	unclassified Euryarchaeota	unclassified Euryarchaeota	unclassified Euryarchaeota	Euryarchaeota	Archaea	LHXS01000001.1	KXA97824.1	A	A-1	AKJ38_00100	>AKJ38_00060(COG1894)	>AKJ38_00065(COG1034)	>AKJ38_00070(COG0446)	>AKJ38_00075(COG3640)	<AKJ38_00080(COG1456)	<AKJ38_00085(COG2069)	<AKJ38_00095(COG1880)	<AKJ38_00100(COG1152)	<AKJ38_00105(COG3640)	<AKJ38_00110	<AKJ38_00115(COG0139)	<AKJ38_00120(COG0140)	<AKJ38_00125(COG0141)	<AKJ38_00130(COG0107)	<AKJ38_00135(COG0131)	<AKJ38_00140(COG0106)	<AKJ38_00145(COG0040)	<AKJ38_00150(COG0079)	<AKJ38_00155(COG1387)
GCA_001549175.1_SCGC-AAA261D19_genomic.gff	MAG	1698273	candidate divison MSBL1 archaeon SCGC-AAA261D19	candidate divison MSBL1 archaeon SCGC-AAA261D19	unclassified Euryarchaeota	unclassified Euryarchaeota	unclassified Euryarchaeota	unclassified Euryarchaeota	Euryarchaeota	Archaea	LHXX01000005.1	KXB02732.1	A	A-1	AKJ43_00705	<AKJ43_00685(COG1456)	<AKJ43_00690(COG2069)	<AKJ43_00700(COG1880)	<AKJ43_00705(COG1152)	<AKJ43_00710
GCA_001549255.1_SCGC-AAA382A03_genomic.gff	MAG	1698278	candidate divison MSBL1 archaeon SCGC-AAA382A03	candidate divison MSBL1 archaeon SCGC-AAA382A03	unclassified Euryarchaeota	unclassified Euryarchaeota	unclassified Euryarchaeota	unclassified Euryarchaeota	Euryarchaeota	Archaea	LHYC01000004.1	KXB05709.1	A	A-1	AKJ49_00305	>AKJ49_00300(COG3640)	>AKJ49_00305(COG1152)	>AKJ49_00310(COG1880)
GCA_001549275.1_SCGC-AAA382A20_genomic.gff	MAG	1698280	candidate divison MSBL1 archaeon SCGC-AAA382A20	candidate divison MSBL1 archaeon SCGC-AAA382A20	unclassified Euryarchaeota	unclassified Euryarchaeota	unclassified Euryarchaeota	unclassified Euryarchaeota	Euryarchaeota	Archaea	LHYE01000048.1	KXB06333.1	D	D-1	AKJ51_03855	>AKJ51_03850(COG1141)	<AKJ51_03855(COG1151)	>AKJ51_03860(COG1719)
GCA_001549435.1_SCGC-AAA382A13_genomic.gff	MAG	1698279	candidate divison MSBL1 archaeon SCGC-AAA382A13	candidate divison MSBL1 archaeon SCGC-AAA382A13	unclassified Euryarchaeota	unclassified Euryarchaeota	unclassified Euryarchaeota	unclassified Euryarchaeota	Euryarchaeota	Archaea	LHYD01000034.1	KXB05050.1	A	A-1	AKJ50_01785	>AKJ50_01780(COG3640)	>AKJ50_01785(COG1152)	>AKJ50_01790(COG1880)
GCA_001563325.1_ASM156332v1_genomic.gff	MAG	1706445	Candidatus Thorarchaeota archaeon SMTZ1-83	Candidatus Thorarchaeota archaeon SMTZ1-83	unclassified Candidatus Thorarchaeota	unclassified Candidatus Thorarchaeota	unclassified Candidatus Thorarchaeota	unclassified Candidatus Thorarchaeota	Candidatus Thorarchaeota	Archaea	LRSK01000221.1	KXH71785.1	A	A-1	AM324_08210	<AM324_08185(COG3640)	<AM324_08190(COG1456)	<AM324_08195(COG2069)	<AM324_08200(COG1614)	<AM324_08205(COG1880)	<AM324_08210(COG1152)	<AM324_08215(COG3640)	<AM324_08220(COG3640)	<AM324_08225
GCA_001563335.1_ASM156333v1_genomic.gff	MAG	1706444	Candidatus Thorarchaeota archaeon SMTZ1-45	Candidatus Thorarchaeota archaeon SMTZ1-45	unclassified Candidatus Thorarchaeota	unclassified Candidatus Thorarchaeota	unclassified Candidatus Thorarchaeota	unclassified Candidatus Thorarchaeota	Candidatus Thorarchaeota	Archaea	LRSL01000013.1	KXH75278.1	A	A-1	AM325_04505	<AM325_04475(COG0427)	<AM325_04480(COG3640)	<AM325_04485(COG1456)	<AM325_04490(COG2069)	<AM325_04495(COG1614)	<AM325_04500(COG1880)	<AM325_04505(COG1152)	<AM325_04510(COG3640)	<AM325_04515(COG1029)	<AM325_04520(COG1456)	>AM325_04525(COG1148)	>AM325_04530(COG1143)	<AM325_04535(COG1153)	>AM325_04540(COG1810)
GCA_001567345.1_ASM156734v1_genomic.gff	MAG	795830	Candidatus Brocadia sinica	Candidatus Brocadia sinica	Candidatus Brocadia	Candidatus Brocadiaceae	Candidatus Brocadiales	Planctomycetia	Planctomycetes	Bacteria	JZEK01000042.1	KXK30310.1	E	E-1	UZ01_01450	<UZ01_01443(COG1410)	<UZ01_01444(COG2069)	<UZ01_01445(COG3640)	<UZ01_01446(COG3894)	<UZ01_01447(COG1456)	<UZ01_01448(COG0740)	<UZ01_01449(COG1614)	<UZ01_01450(COG1151)	<UZ01_01451(COG3640)
GCA_001577555.1_ASM157755v1_genomic.gff	MAG	1794907	Methanohalophilus sp. T328-1	Methanohalophilus sp. T328-1	Methanohalophilus	Methanosarcinaceae	Methanosarcinales	Methanomicrobia	Euryarchaeota	Archaea	LSRU01000017.1	KXS46542.1	A	A-1	AWU58_469	>AWU58_469(COG1152)	>AWU58_470(COG1880)	>AWU58_471(COG1614)	>AWU58_472(COG3640)	>AWU58_473(COG2069)	>AWU58_474(COG1456)	>AWU58_475(COG2768)	>AWU58_476(COG0136)
GCA_001577565.1_ASM157756v1_genomic.gff	MAG	1794908	Methanolobus sp. T82-4	Methanolobus sp. T82-4	Methanolobus	Methanosarcinaceae	Methanosarcinales	Methanomicrobia	Euryarchaeota	Archaea	LSRV01000042.1	KXS42736.1	D	D-1	AWU59_1488	>AWU59_1483(COG1045)	>AWU59_1484(COG0031)	>AWU59_1485(COG0389)	>AWU59_1486(COG1226)	>AWU59_1487(COG0642)	>AWU59_1488(COG1151)	>AWU59_1489	>AWU59_1490(COG2037)	>AWU59_1491(COG1305)	>AWU59_1492(COG0589)
GCA_001577625.1_ASM157762v1_genomic.gff	MAG	1785949	Candidatus Frackibacter sp. T328-2	Candidatus Frackibacter sp. T328-2	Candidatus Frackibacter	Halobacteroidaceae	Halanaerobiales	Clostridia	Firmicutes	Bacteria	LSBO01000022.1	KXS44578.1	F	F-1	AWU54_721	<AWU54_709	<AWU54_710(COG1615)	<AWU54_711(COG1034)	<AWU54_712(COG1142)	<AWU54_713(COG1894)	<AWU54_714(COG1905)	<AWU54_715(COG1410)	<AWU54_716(COG2069)	<AWU54_717(COG3640)	<AWU54_718(COG3894)	<AWU54_719(COG1456)	<AWU54_720(COG1614)	<AWU54_721(COG1151)	<AWU54_722(COG3640)
GCA_001577715.1_ASM157771v1_genomic.gff	MAG	1705730	Candidatus Adiutrix intracellularis	Candidatus Adiutrix intracellularis	Candidatus Adiutrix	unclassified Deltaproteobacteria	unclassified Deltaproteobacteria	Deltaproteobacteria	Proteobacteria	Bacteria	LQAA01000049.1	KXS56482.1	E	E-1	AMR96_02450	>AMR96_02450(COG1151)
GCA_001587595.1_ASM158759v1_genomic.gff	MAG	1706433	Arc I group archaeon ADurb1013_Bin02101	Arc I group archaeon ADurb1013_Bin02101	unclassified Methanomicrobia	unclassified Methanomicrobia	unclassified Methanomicrobia	Methanomicrobia	Euryarchaeota	Archaea	LNJB01000001.1	KYC55485.1	D	D-1	AN188_00137	<AN188_00136	<AN188_00137(COG1151)	<AN188_00138(COG1917)	<AN188_00139(COG1149)
GCA_001587655.1_ASM158765v1_genomic.gff	MAG	1706436	Arc I group archaeon B03fssc0709_Meth_Bin005	Arc I group archaeon B03fssc0709_Meth_Bin005	unclassified Methanomicrobia	unclassified Methanomicrobia	unclassified Methanomicrobia	Methanomicrobia	Euryarchaeota	Archaea	LNGE01000022.1	KYC45321.1	D	D-1	APG10_00963	>APG10_00961(COG1149)	>APG10_00962(COG1917)	>APG10_00963(COG1151)	>APG10_00964	>APG10_00965(COG3642)
GCA_001593845.1_ASM159384v1_genomic.gff	MAG	1779372	Candidatus Bathyarchaeota archaeon B63	Candidatus Bathyarchaeota archaeon B63	unclassified Candidatus Bathyarchaeota	unclassified Candidatus Bathyarchaeota	unclassified Candidatus Bathyarchaeota	unclassified Candidatus Bathyarchaeota	Candidatus Bathyarchaeota	Archaea	LUCF01000041.1	KYH41259.1	A	A-1	AYL33_004680	>AYL33_004680(COG1152)	>AYL33_004690(COG1880)	>AYL33_004700(COG1614)	>AYL33_004710(COG2069)
GCA_001593855.1_ASM159385v1_genomic.gff	MAG	1779369	Candidatus Bathyarchaeota archaeon B25	Candidatus Bathyarchaeota archaeon B25	unclassified Candidatus Bathyarchaeota	unclassified Candidatus Bathyarchaeota	unclassified Candidatus Bathyarchaeota	unclassified Candidatus Bathyarchaeota	Candidatus Bathyarchaeota	Archaea	LUCC01000056.1	KYH36488.1	A	A-1	AYL30_007530	>AYL30_007530(COG1152)	>AYL30_007540(COG1880)	>AYL30_007550(COG1614)	>AYL30_007560(COG2069)
GCA_001593865.1_ASM159386v1_genomic.gff	MAG	1779368	Candidatus Bathyarchaeota archaeon B24	Candidatus Bathyarchaeota archaeon B24	unclassified Candidatus Bathyarchaeota	unclassified Candidatus Bathyarchaeota	unclassified Candidatus Bathyarchaeota	unclassified Candidatus Bathyarchaeota	Candidatus Bathyarchaeota	Archaea	LUCB01000007.1	KYH37445.1	A	A-1	AYL29_006760	>AYL29_006740(COG3640)	<AYL29_006750(COG1880)	<AYL29_006760(COG1152)	>AYL29_006770(COG1614)	>AYL29_006780(COG2069)	>AYL29_006790(COG1456)	>AYL29_006800(COG3640)	>AYL29_006810(COG2069)	>AYL29_006820(COG1456)
GCA_001595815.1_ASM159581v1_genomic.gff	MAG	1803814	Theionarchaea archaeon DG-70-1	Theionarchaea archaeon DG-70-1	unclassified Theionarchaea	unclassified Theionarchaea	unclassified Theionarchaea	Theionarchaea	Euryarchaeota	Archaea	LSSC01000040.1	KYK35828.1	A	A-1	AYK19_22210	>AYK19_22205	>AYK19_22210(COG1152)	>AYK19_22215(COG1880)	>AYK19_22220(COG1614)	>AYK19_22225(COG3640)	>AYK19_22230(COG2069)	>AYK19_22235(COG1456)	>AYK19_22240(COG1456)	>AYK19_22245	>AYK19_22250(COG0456)
GCA_001714685.2_ASM171468v2_genomic.gff	MAG	1882735	Methanosarcina sp. Ant1	Methanosarcina sp. Ant1	Methanosarcina	Methanosarcinaceae	Methanosarcinales	Methanomicrobia	Euryarchaeota	Archaea	MDTP02000088.1	OEU42370.1	A	A-1	BGV40_09965	<BGV40_09940(COG1456)	<BGV40_09945(COG2069)	<BGV40_09950(COG3640)	<BGV40_09955(COG1614)	<BGV40_09960(COG1880)	<BGV40_09965(COG1152)
GCA_001714685.2_ASM171468v2_genomic.gff	MAG	1882735	Methanosarcina sp. Ant1	Methanosarcina sp. Ant1	Methanosarcina	Methanosarcinaceae	Methanosarcinales	Methanomicrobia	Euryarchaeota	Archaea	MDTP02000093.1	OEU42281.1	D	D-1	BGV40_10395	>BGV40_10395(COG1151)
GCA_001714685.2_ASM171468v2_genomic.gff	MAG	1882735	Methanosarcina sp. Ant1	Methanosarcina sp. Ant1	Methanosarcina	Methanosarcinaceae	Methanosarcinales	Methanomicrobia	Euryarchaeota	Archaea	MDTP02000166.1	OEU41456.1	E	E-1	BGV40_14845	<BGV40_14830(COG3366)	<BGV40_14835(COG0589)	<BGV40_14840(COG1142)	<BGV40_14845(COG1151)
GCA_001723765.1_ASM172376v1_genomic.gff	MAG	1872076	Candidatus Scalindua rubra	Candidatus Scalindua rubra	Candidatus Scalindua	Candidatus Brocadiaceae	Candidatus Brocadiales	Planctomycetia	Planctomycetes	Bacteria	MAYW01000009.1	ODS34313.1	E	E-1	SCARUB_00572	>SCARUB_00571(COG3640)	>SCARUB_00572(COG1151)	>SCARUB_00573(COG1614)	>SCARUB_00574(COG0740)	>SCARUB_00575	>SCARUB_00576(COG1456)	>SCARUB_00577(COG3894)	>SCARUB_00578(COG3640)
GCA_001723765.1_ASM172376v1_genomic.gff	MAG	1872076	Candidatus Scalindua rubra	Candidatus Scalindua rubra	Candidatus Scalindua	Candidatus Brocadiaceae	Candidatus Brocadiales	Planctomycetia	Planctomycetes	Bacteria	MAYW01000076.1	ODS32127.1	F	F-1	SCARUB_02729	>SCARUB_02729(COG1151)
GCA_001723845.1_ASM172384v1_genomic.gff	MAG	1849261	Candidatus Altiarchaeales archaeon WOR_SM1_SCG	Candidatus Altiarchaeales archaeon WOR_SM1_SCG	unclassified Candidatus Altiarchaeales	unclassified Candidatus Altiarchaeales	Candidatus Altiarchaeales	unclassified Euryarchaeota	Euryarchaeota	Archaea	MCBE01000278.1	ODS35460.1	A	A-5	BEH94_06455	<BEH94_06445(COG1614)	<BEH94_06450(COG1143)	<BEH94_06455(COG1152)	<BEH94_06460(COG2522)	<BEH94_06465(COG2014)	<BEH94_06470
GCA_001723855.1_ASM172385v1_genomic.gff	MAG	1849364	Candidatus Altiarchaeales archaeon WOR_SM1_86-2	Candidatus Altiarchaeales archaeon WOR_SM1_86-2	unclassified Candidatus Altiarchaeales	unclassified Candidatus Altiarchaeales	Candidatus Altiarchaeales	unclassified Euryarchaeota	Euryarchaeota	Archaea	MCBC01000025.1	ODS39088.1	A	A-5	A7316_06380	<A7316_06360	<A7316_06365(COG1371)	<A7316_06370(COG2051)	<A7316_06375(COG0864)	<A7316_06380(COG1152)	<A7316_06385(COG1180)	<A7316_06390(COG1433)	<A7316_06395(COG0489)
GCA_001723855.1_ASM172385v1_genomic.gff	MAG	1849364	Candidatus Altiarchaeales archaeon WOR_SM1_86-2	Candidatus Altiarchaeales archaeon WOR_SM1_86-2	unclassified Candidatus Altiarchaeales	unclassified Candidatus Altiarchaeales	Candidatus Altiarchaeales	unclassified Euryarchaeota	Euryarchaeota	Archaea	MCBC01000140.1	ODS35932.1	A	A-2	A7316_10515	<A7316_10510(COG2524)	<A7316_10515(COG1152)	<A7316_10520(COG1342)	<A7316_10525(COG2005)	<A7316_10530(COG2014)	<A7316_10535(COG4012)	<A7316_10540(COG2191)	<A7316_10545
GCA_001742785.1_ASM174278v1_genomic.gff	MAG	1878999	Candidatus Altiarchaeales archaeon IMC4	Candidatus Altiarchaeales archaeon IMC4	unclassified Candidatus Altiarchaeales	unclassified Candidatus Altiarchaeales	Candidatus Altiarchaeales	unclassified Euryarchaeota	Euryarchaeota	Archaea	MCBF01000001.1	ODS42986.1	A	A-5	MSIBF_06975	>MSIBF_06965(COG1813)	>MSIBF_06970(COG0018)	>MSIBF_06975(COG1152)	>MSIBF_06980	>MSIBF_06985	>MSIBF_06990(COG1614)	>MSIBF_06995	>MSIBF_07000	>MSIBF_07005(COG1089)	>MSIBF_07010	>MSIBF_07015(COG1373)	>MSIBF_07020(COG0438)
GCA_001750915.1_ASM175091v1_genomic.gff	MAG	1869297	Desulfovibrio sp. S3730MH75	Desulfovibrio sp. S3730MH75	Desulfovibrio	Desulfovibrionaceae	Desulfovibrionales	Deltaproteobacteria	Proteobacteria	Bacteria	MAXI01000202.1	OEU68162.1	E	E-2	BA863_13885	>BA863_13880	>BA863_13885(COG1151)	>BA863_13890(COG3640)
GCA_001750925.1_ASM175092v1_genomic.gff	MAG	1869305	Desulfobulbaceae bacterium S3730MH12	Desulfobulbaceae bacterium S3730MH12	unclassified Desulfobulbaceae	Desulfobulbaceae	Desulfobacterales	Deltaproteobacteria	Proteobacteria	Bacteria	MAXH01000175.1	OEU56397.1	E	E-1	BA862_08255	<BA862_08220	<BA862_08225	<BA862_08230(COG3640)	<BA862_08235	<BA862_08240(COG1410)	<BA862_08245(COG1456)	<BA862_08250(COG1614)	<BA862_08255(COG1151)	<BA862_08260(COG2069)	<BA862_08265(COG3894)
GCA_001750945.1_ASM175094v1_genomic.gff	MAG	1869298	Desulfobacterales bacterium S3730MH5	Desulfobacterales bacterium S3730MH5	unclassified Desulfobacterales	unclassified Desulfobacterales	Desulfobacterales	Deltaproteobacteria	Proteobacteria	Bacteria	MAXG01000017.1	OEU53764.1	E	E-1	BA861_05500	>BA861_05500(COG1151)	>BA861_05505(COG1251)	>BA861_05510(COG0437)
GCA_001750945.1_ASM175094v1_genomic.gff	MAG	1869298	Desulfobacterales bacterium S3730MH5	Desulfobacterales bacterium S3730MH5	unclassified Desulfobacterales	unclassified Desulfobacterales	Desulfobacterales	Deltaproteobacteria	Proteobacteria	Bacteria	MAXG01000438.1	OEU47679.1	E	E-3	BA861_11610	>BA861_11610(COG1151)	>BA861_11615(COG0493)	>BA861_11620(COG1908)	>BA861_11625	>BA861_11630(COG0685)
GCA_001751015.1_ASM175101v1_genomic.gff	MAG	1869301	Desulfobacterales bacterium C00003106	Desulfobacterales bacterium C00003106	unclassified Desulfobacterales	unclassified Desulfobacterales	Desulfobacterales	Deltaproteobacteria	Proteobacteria	Bacteria	MAXM01000280.1	OEU52739.1	E	E-1	BA868_00855	>BA868_00845(COG0365)	>BA868_00850	>BA868_00855(COG1151)	>BA868_00860	>BA868_00865
GCA_001751075.1_ASM175107v1_genomic.gff	MAG	1869302	Desulfobacterales bacterium S7086C20	Desulfobacterales bacterium S7086C20	unclassified Desulfobacterales	unclassified Desulfobacterales	Desulfobacterales	Deltaproteobacteria	Proteobacteria	Bacteria	MAVP01000015.1	OEU46023.1	E	E-3	BBJ60_04895	>BBJ60_04845(COG2759)	>BBJ60_04850(COG1148)	>BBJ60_04855(COG1148)	>BBJ60_04860(COG1908)	>BBJ60_04865(COG1908)	>BBJ60_04870(COG1150)	>BBJ60_04875(COG1905)	>BBJ60_04880(COG1894)	>BBJ60_04885(COG1034)	>BBJ60_04890(COG0190)	>BBJ60_04895(COG1151)	>BBJ60_04900(COG1614)	>BBJ60_04905(COG0493)	>BBJ60_04910	>BBJ60_04915(COG0685)	>BBJ60_04920(COG0745)	>BBJ60_04925(COG0745)	>BBJ60_04930(COG5002)
GCA_001751085.1_ASM175108v1_genomic.gff	MAG	1869303	Desulfobacterales bacterium C00003060	Desulfobacterales bacterium C00003060	unclassified Desulfobacterales	unclassified Desulfobacterales	Desulfobacterales	Deltaproteobacteria	Proteobacteria	Bacteria	MAXP01000138.1	OEU80106.1	E	E-3	BA872_02360	<BA872_02340	<BA872_02345	<BA872_02350	<BA872_02355	<BA872_02360(COG1151)	<BA872_02365(COG0190)	<BA872_02370(COG1148)
GCA_001751115.2_ASM175111v2_genomic.gff	MAG	1869311	Desulfuromonadales bacterium C00003096	Desulfuromonadales bacterium C00003096	unclassified Desulfuromonadales	unclassified Desulfuromonadales	Desulfuromonadales	Deltaproteobacteria	Proteobacteria	Bacteria	MAXO01000071.1	OEU57504.1	E	E-1	BA871_01130	>BA871_01130(COG1151)	>BA871_01135(COG0455)	>BA871_01140	>BA871_01145(COG0517)
GCA_001751115.2_ASM175111v2_genomic.gff	MAG	1869311	Desulfuromonadales bacterium C00003096	Desulfuromonadales bacterium C00003096	unclassified Desulfuromonadales	unclassified Desulfuromonadales	Desulfuromonadales	Deltaproteobacteria	Proteobacteria	Bacteria	MAXO01000751.1	OEU48091.1	E	E-1	BA871_05150	<BA871_05135	<BA871_05140(COG0437)	<BA871_05145(COG3640)	<BA871_05150(COG1151)	<BA871_05155(COG3279)
GCA_001766815.1_ASM176681v1_genomic.gff	MAG	1838285	Candidatus Syntrophoarchaeum caldarius	Candidatus Syntrophoarchaeum caldarius	Candidatus Syntrophoarchaeum	unclassified Methanosarcinales	Methanosarcinales	Methanomicrobia	Euryarchaeota	Archaea	LYOS01000002.1	OFV68309.1	E	E-1	SCAL_000949	>SCAL_000949(COG1151)
GCA_001766815.1_ASM176681v1_genomic.gff	MAG	1838285	Candidatus Syntrophoarchaeum caldarius	Candidatus Syntrophoarchaeum caldarius	Candidatus Syntrophoarchaeum	unclassified Methanosarcinales	Methanosarcinales	Methanomicrobia	Euryarchaeota	Archaea	LYOS01000003.1	OFV67597.1	D	D-1	SCAL_000972	>SCAL_000971	>SCAL_000972(COG1151)	>SCAL_000973	>SCAL_000974(COG1917)	>SCAL_000975	>SCAL_000976(COG1592)	>SCAL_000977(COG5561)	>SCAL_000978(COG1149)	>SCAL_000979(COG1917)	>SCAL_000980(COG1810)	>SCAL_000981	>SCAL_000982
GCA_001766815.1_ASM176681v1_genomic.gff	MAG	1838285	Candidatus Syntrophoarchaeum caldarius	Candidatus Syntrophoarchaeum caldarius	Candidatus Syntrophoarchaeum	unclassified Methanosarcinales	Methanosarcinales	Methanomicrobia	Euryarchaeota	Archaea	LYOS01000004.1	OFV67586.1	A	A-1	SCAL_001504	<SCAL_001499(COG1456)	<SCAL_001500(COG2069)	<SCAL_001501	<SCAL_001502(COG1614)	<SCAL_001503(COG1880)	<SCAL_001504(COG1152)
GCA_001766815.1_ASM176681v1_genomic.gff	MAG	1838285	Candidatus Syntrophoarchaeum caldarius	Candidatus Syntrophoarchaeum caldarius	Candidatus Syntrophoarchaeum	unclassified Methanosarcinales	Methanosarcinales	Methanomicrobia	Euryarchaeota	Archaea	LYOS01000005.1	OFV67313.1	A	A-2	SCAL_001582	<SCAL_001581(COG1149)	>SCAL_001582(COG1152)	>SCAL_001583(COG1880)	>SCAL_001584(COG1614)	>SCAL_001585(COG3640)	>SCAL_001586	>SCAL_001587(COG2069)	>SCAL_001588(COG1456)
GCA_001766825.1_ASM176682v1_genomic.gff	MAG	1839936	Candidatus Syntrophoarchaeum butanivorans	Candidatus Syntrophoarchaeum butanivorans	Candidatus Syntrophoarchaeum	unclassified Methanosarcinales	Methanosarcinales	Methanomicrobia	Euryarchaeota	Archaea	LYOR01000003.1	OFV66349.1	A	A-1	SBU_000891	<SBU_000885(COG0368)	<SBU_000886(COG1456)	<SBU_000887(COG2069)	<SBU_000888	<SBU_000889(COG1614)	<SBU_000890(COG1880)	<SBU_000891(COG1152)	<SBU_000892
GCA_001766825.1_ASM176682v1_genomic.gff	MAG	1839936	Candidatus Syntrophoarchaeum butanivorans	Candidatus Syntrophoarchaeum butanivorans	Candidatus Syntrophoarchaeum	unclassified Methanosarcinales	Methanosarcinales	Methanomicrobia	Euryarchaeota	Archaea	LYOR01000005.1	OFV66004.1	D	D-1	SBU_001186	>SBU_001185	>SBU_001186(COG1151)	>SBU_001187	>SBU_001188(COG1592)	>SBU_001189(COG5561)	>SBU_001190
GCA_001766825.1_ASM176682v1_genomic.gff	MAG	1839936	Candidatus Syntrophoarchaeum butanivorans	Candidatus Syntrophoarchaeum butanivorans	Candidatus Syntrophoarchaeum	unclassified Methanosarcinales	Methanosarcinales	Methanomicrobia	Euryarchaeota	Archaea	LYOR01000011.1	OFV65538.1	A	A-2	SBU_001568	>SBU_001568(COG1152)	>SBU_001569(COG1880)	>SBU_001570(COG1614)	>SBU_001571(COG3640)	>SBU_001572(COG2069)	>SBU_001573(COG1456)
GCA_001767055.1_ASM176705v1_genomic.gff	MAG	1797184	Acidobacteria bacterium RIFCSPLOWO2_02_FULL_67_36	Acidobacteria bacterium RIFCSPLOWO2_02_FULL_67_36	unclassified Acidobacteria	unclassified Acidobacteria	unclassified Acidobacteria	unclassified Acidobacteria	Acidobacteria	Bacteria	MEKV01000069.1	OFW08792.1	E	E-1	A3H96_08040	<A3H96_08020(COG1456)	<A3H96_08025(COG2069)	<A3H96_08030(COG1614)	<A3H96_08035(COG1251)	<A3H96_08040(COG1151)	<A3H96_08045(COG3640)	<A3H96_08050(COG3640)	<A3H96_08055
GCA_001768115.1_ASM176811v1_genomic.gff	MAG	1797288	Armatimonadetes bacterium RBG_16_67_12	Armatimonadetes bacterium RBG_16_67_12	unclassified Armatimonadetes	unclassified Armatimonadetes	unclassified Armatimonadetes	unclassified Armatimonadetes	Armatimonadetes	Bacteria	MENA01000065.1	OFX30890.1	E	E-1	A2Z07_06515	<A2Z07_06455(COG0685)	<A2Z07_06460(COG2759)	<A2Z07_06465	<A2Z07_06470	<A2Z07_06475(COG2030)	<A2Z07_06480(COG1410)	<A2Z07_06485(COG2069)	<A2Z07_06490	<A2Z07_06495(COG3640)	<A2Z07_06500(COG3894)	<A2Z07_06505(COG1456)	<A2Z07_06510(COG1614)	<A2Z07_06515(COG1151)	<A2Z07_06520(COG3640)
GCA_001768645.1_ASM176864v1_genomic.gff	MAG	1797197	Actinobacteria bacterium RBG_13_55_18	Actinobacteria bacterium RBG_13_55_18	unclassified Actinobacteria	unclassified Actinobacteria	unclassified Actinobacteria	unclassified Actinobacteria	Actinobacteria	Bacteria	MELK01000048.1	OFW56134.1	E	E-1	A2Y75_03155	>A2Y75_03125(COG2759)	>A2Y75_03130(COG3894)	>A2Y75_03135(COG3640)	>A2Y75_03140(COG3404)	>A2Y75_03145(COG0190)	>A2Y75_03150(COG2069)	>A2Y75_03155(COG1151)	>A2Y75_03160(COG1614)	>A2Y75_03165(COG1456)	>A2Y75_03170	>A2Y75_03175(COG0685)	>A2Y75_03180	>A2Y75_03185(COG0320)	>A2Y75_03190(COG1410)	>A2Y75_03195	>A2Y75_03200(COG1894)	>A2Y75_03205(COG3383)	>A2Y75_03210(COG3383)	>A2Y75_03215(COG0318)	>A2Y75_03220(COG0586)
GCA_001768675.1_ASM176867v1_genomic.gff	MAG	1797200	Actinobacteria bacterium RBG_16_64_13	Actinobacteria bacterium RBG_16_64_13	unclassified Actinobacteria	unclassified Actinobacteria	unclassified Actinobacteria	unclassified Actinobacteria	Actinobacteria	Bacteria	MELN01000021.1	OFW60662.1	E	E-1	A2133_05835	>A2133_05820	>A2133_05825(COG3640)	>A2133_05830(COG2608)	>A2133_05835(COG1151)	>A2133_05840(COG1614)	>A2133_05845(COG2069)	>A2133_05850(COG1456)	>A2133_05855(COG3894)	>A2133_05860(COG3640)	>A2133_05865(COG1410)
GCA_001773915.1_ASM177391v1_genomic.gff	MAG	1797275	Candidatus Aminicenantes bacterium RBG_19FT_COMBO_58_17	Candidatus Aminicenantes bacterium RBG_19FT_COMBO_58_17	unclassified Candidatus Aminicenantes	unclassified Candidatus Aminicenantes	unclassified Candidatus Aminicenantes	unclassified Candidatus Aminicenantes	Candidatus Aminicenantes	Bacteria	MEYD01000103.1	OGD37512.1	E	E-1	A2V45_11580	<A2V45_11560(COG2207)	>A2V45_11565(COG5012)	>A2V45_11570(COG3640)	>A2V45_11575	>A2V45_11580(COG1151)	>A2V45_11585(COG1614)	>A2V45_11590(COG3640)	>A2V45_11595	>A2V45_11600(COG1456)	>A2V45_11605(COG3894)	>A2V45_11610(COG0646)	>A2V45_11615(COG5012)	>A2V45_11620
GCA_001775955.1_ASM177595v1_genomic.gff	MAG	1797377	Candidatus Bathyarchaeota archaeon RBG_13_38_9	Candidatus Bathyarchaeota archaeon RBG_13_38_9	unclassified Candidatus Bathyarchaeota	unclassified Candidatus Bathyarchaeota	unclassified Candidatus Bathyarchaeota	unclassified Candidatus Bathyarchaeota	Candidatus Bathyarchaeota	Archaea	MEZD01000009.1	OGD54524.1	A	A-1	A3K80_08900	>A3K80_08890(COG0189)	>A3K80_08895(COG3640)	>A3K80_08900(COG1152)	>A3K80_08905(COG1880)	>A3K80_08910(COG1614)	>A3K80_08915(COG2069)	>A3K80_08920(COG1456)	>A3K80_08925(COG3640)	>A3K80_08930(COG1810)	>A3K80_08935(COG1810)
GCA_001775965.1_ASM177596v1_genomic.gff	MAG	1797380	Candidatus Bathyarchaeota archaeon RBG_13_60_20	Candidatus Bathyarchaeota archaeon RBG_13_60_20	unclassified Candidatus Bathyarchaeota	unclassified Candidatus Bathyarchaeota	unclassified Candidatus Bathyarchaeota	unclassified Candidatus Bathyarchaeota	Candidatus Bathyarchaeota	Archaea	MEZG01000068.1	OGD52777.1	A	A-1	A3K81_06780	<A3K81_06760(COG1456)	<A3K81_06765(COG2069)	<A3K81_06770(COG1614)	<A3K81_06775(COG1880)	<A3K81_06780(COG1152)	>A3K81_06785(COG0685)
GCA_001778455.1_ASM177845v1_genomic.gff	MAG	1817864	Candidatus Fraserbacteria bacterium RBG_16_55_9	Candidatus Fraserbacteria bacterium RBG_16_55_9	unclassified Candidatus Fraserbacteria	unclassified Candidatus Fraserbacteria	unclassified Candidatus Fraserbacteria	unclassified Candidatus Fraserbacteria	Candidatus Fraserbacteria	Bacteria	MFGX01000066.1	OGF54999.1	E	E-1	A2Z21_05335	>A2Z21_05335(COG1151)	>A2Z21_05340	>A2Z21_05345(COG0607)	>A2Z21_05350(COG0183)	>A2Z21_05355	>A2Z21_05360(COG1905)	>A2Z21_05365
GCA_001789195.1_ASM178919v1_genomic.gff	MAG	1817884	Candidatus Raymondbacteria bacterium RifOxyA12_full_50_37	Candidatus Raymondbacteria bacterium RifOxyA12_full_50_37	unclassified Candidatus Raymondbacteria	unclassified Candidatus Raymondbacteria	unclassified Candidatus Raymondbacteria	unclassified Candidatus Raymondbacteria	Candidatus Raymondbacteria	Bacteria	MFYS01000062.1	OGJ86528.1	E	E-1	A2268_15750	>A2268_15725(COG2207)	>A2268_15730(COG0628)	<A2268_15735(COG3894)	<A2268_15740(COG1456)	<A2268_15745(COG1614)	<A2268_15750(COG1151)	<A2268_15755(COG3640)	<A2268_15760	<A2268_15765	<A2268_15770(COG3640)	>A2268_15775(COG2207)
GCA_001794945.1_ASM179494v1_genomic.gff	MAG	1797616	Chloroflexi bacterium GWC2_73_18	Chloroflexi bacterium GWC2_73_18	unclassified Chloroflexi	unclassified Chloroflexi	unclassified Chloroflexi	unclassified Chloroflexi	Chloroflexi	Bacteria	MGMJ01000089.1	OGN83437.1	E	E-2	A2X23_04675	<A2X23_04655(COG1351)	<A2X23_04660(COG2141)	<A2X23_04665	<A2X23_04670(COG3640)	<A2X23_04675(COG1151)	<A2X23_04680(COG0437)
GCA_001794985.1_ASM179498v1_genomic.gff	MAG	1797619	Chloroflexi bacterium RBG_13_46_9	Chloroflexi bacterium RBG_13_46_9	unclassified Chloroflexi	unclassified Chloroflexi	unclassified Chloroflexi	unclassified Chloroflexi	Chloroflexi	Bacteria	MGMM01000094.1	OGN88526.1	E	E-1	A2Z74_06940	<A2Z74_06935	<A2Z74_06940(COG1151)	<A2Z74_06945	<A2Z74_06950	<A2Z74_06955	<A2Z74_06960(COG0190)	<A2Z74_06965(COG3640)	<A2Z74_06970	<A2Z74_06975(COG3640)
GCA_001795015.1_ASM179501v1_genomic.gff	MAG	1797622	Chloroflexi bacterium RBG_13_50_10	Chloroflexi bacterium RBG_13_50_10	unclassified Chloroflexi	unclassified Chloroflexi	unclassified Chloroflexi	unclassified Chloroflexi	Chloroflexi	Bacteria	MGMP01000147.1	OGN91570.1	A	others	A2Z75_00155	>A2Z75_00145	>A2Z75_00150(COG2069)	>A2Z75_00155(COG1152)	>A2Z75_00160(COG1810)	>A2Z75_00165(COG1880)	>A2Z75_00170	>A2Z75_00175(COG1456)	>A2Z75_00180	>A2Z75_00185(COG1894)	>A2Z75_00190	>A2Z75_00195(COG4226)	>A2Z75_00200(COG0154)	>A2Z75_00205(COG0235)
GCA_001795035.1_ASM179503v1_genomic.gff	MAG	1797629	Chloroflexi bacterium RBG_13_53_26	Chloroflexi bacterium RBG_13_53_26	unclassified Chloroflexi	unclassified Chloroflexi	unclassified Chloroflexi	unclassified Chloroflexi	Chloroflexi	Bacteria	MGMW01000072.1	OGO02296.1	E	E-2	A2Y72_07140	<A2Y72_07135(COG1251)	<A2Y72_07140(COG1151)	<A2Y72_07145(COG0437)	<A2Y72_07150(COG0318)
GCA_001795065.1_ASM179506v1_genomic.gff	MAG	1797637	Chloroflexi bacterium RBG_13_66_10	Chloroflexi bacterium RBG_13_66_10	unclassified Chloroflexi	unclassified Chloroflexi	unclassified Chloroflexi	unclassified Chloroflexi	Chloroflexi	Bacteria	MGNE01000016.1	OGO13607.1	E	E-1	A2Z66_01145	>A2Z66_01135(COG1810)	>A2Z66_01140	>A2Z66_01145(COG1151)	>A2Z66_01150(COG1614)	>A2Z66_01155(COG1614)	>A2Z66_01160	>A2Z66_01165	>A2Z66_01170	>A2Z66_01175
GCA_001795085.1_ASM179508v1_genomic.gff	MAG	1797639	Chloroflexi bacterium RBG_16_47_49	Chloroflexi bacterium RBG_16_47_49	unclassified Chloroflexi	unclassified Chloroflexi	unclassified Chloroflexi	unclassified Chloroflexi	Chloroflexi	Bacteria	MGNG01000102.1	OGO11548.1	E	E-1	A2Y53_04210	>A2Y53_04195(COG0664)	>A2Y53_04200(COG1670)	>A2Y53_04205(COG2608)	>A2Y53_04210(COG1151)	>A2Y53_04215(COG1614)	>A2Y53_04220(COG2069)	>A2Y53_04225(COG1456)	>A2Y53_04230(COG3894)	>A2Y53_04235(COG1410)	>A2Y53_04240(COG0281)	>A2Y53_04245(COG0492)
GCA_001795115.1_ASM179511v1_genomic.gff	MAG	1797641	Chloroflexi bacterium RBG_16_48_8	Chloroflexi bacterium RBG_16_48_8	unclassified Chloroflexi	unclassified Chloroflexi	unclassified Chloroflexi	unclassified Chloroflexi	Chloroflexi	Bacteria	MGNI01000089.1	OGO18726.1	E	E-1	A2Z14_09530	<A2Z14_09500(COG1410)	<A2Z14_09505(COG3640)	<A2Z14_09510(COG3894)	<A2Z14_09515(COG1456)	<A2Z14_09520(COG2069)	<A2Z14_09525	<A2Z14_09530(COG1151)	<A2Z14_09535	<A2Z14_09540	>A2Z14_09545(COG0642)
GCA_001795125.1_ASM179512v1_genomic.gff	MAG	1797648	Chloroflexi bacterium RBG_16_54_18	Chloroflexi bacterium RBG_16_54_18	unclassified Chloroflexi	unclassified Chloroflexi	unclassified Chloroflexi	unclassified Chloroflexi	Chloroflexi	Bacteria	MGNP01000007.1	OGO34993.1	E	E-1	A2Z16_02780	>A2Z16_02775(COG2608)	>A2Z16_02780(COG1151)	>A2Z16_02785(COG1614)	>A2Z16_02790(COG0517)
GCA_001795335.1_ASM179533v1_genomic.gff	MAG	1797669	Chloroflexi bacterium RBG_19FT_COMBO_55_16	Chloroflexi bacterium RBG_19FT_COMBO_55_16	unclassified Chloroflexi	unclassified Chloroflexi	unclassified Chloroflexi	unclassified Chloroflexi	Chloroflexi	Bacteria	MGOK01000043.1	OGO65616.1	F	F-1	A2Z45_03745	<A2Z45_03735(COG1251)	<A2Z45_03740(COG1142)	<A2Z45_03745(COG1151)	<A2Z45_03750(COG2197)	<A2Z45_03755(COG4585)
GCA_001795335.1_ASM179533v1_genomic.gff	MAG	1797669	Chloroflexi bacterium RBG_19FT_COMBO_55_16	Chloroflexi bacterium RBG_19FT_COMBO_55_16	unclassified Chloroflexi	unclassified Chloroflexi	unclassified Chloroflexi	unclassified Chloroflexi	Chloroflexi	Bacteria	MGOK01000082.1	OGO64506.1	E	E-1	A2Z45_03880	<A2Z45_03805	<A2Z45_03810(COG0642)	<A2Z45_03815(COG0745)	<A2Z45_03820	<A2Z45_03825	<A2Z45_03830(COG1908)	<A2Z45_03835(COG1148)	<A2Z45_03840(COG0492)	<A2Z45_03845(COG0281)	<A2Z45_03850	<A2Z45_03855	<A2Z45_03860(COG3894)	<A2Z45_03865(COG1456)	<A2Z45_03870(COG2069)	<A2Z45_03875(COG1614)	<A2Z45_03880(COG1151)	<A2Z45_03885(COG2608)
GCA_001795385.1_ASM179538v1_genomic.gff	MAG	1797679	Clostridiales bacterium GWD2_32_19	Clostridiales bacterium GWD2_32_19	unclassified Clostridiales	unclassified Clostridiales	Clostridiales	Clostridia	Firmicutes	Bacteria	MGOU01000032.1	OGO82308.1	D	D-2	A2Y18_01365	<A2Y18_01365(COG1151)
GCA_001796335.1_ASM179633v1_genomic.gff	MAG	1797612	Chloroflexi bacterium GWB2_49_20	Chloroflexi bacterium GWB2_49_20	unclassified Chloroflexi	unclassified Chloroflexi	unclassified Chloroflexi	unclassified Chloroflexi	Chloroflexi	Bacteria	MGMF01000001.1	OGN76441.1	F	F-1	A2X25_09500	<A2X25_09490(COG1251)	<A2X25_09495(COG1142)	<A2X25_09500(COG1151)	<A2X25_09505(COG2197)	<A2X25_09510(COG4585)	<A2X25_09515(COG1172)
GCA_001796335.1_ASM179633v1_genomic.gff	MAG	1797612	Chloroflexi bacterium GWB2_49_20	Chloroflexi bacterium GWB2_49_20	unclassified Chloroflexi	unclassified Chloroflexi	unclassified Chloroflexi	unclassified Chloroflexi	Chloroflexi	Bacteria	MGMF01000021.1	OGN73072.1	E	E-1	A2X25_11025	<A2X25_10985(COG1247)	<A2X25_10990(COG0685)	<A2X25_10995(COG1410)	<A2X25_11000(COG3894)	<A2X25_11005(COG1456)	<A2X25_11010(COG2069)	<A2X25_11015(COG0517)	<A2X25_11020(COG1614)	<A2X25_11025(COG1151)	<A2X25_11030
GCA_001796415.1_ASM179641v1_genomic.gff	MAG	1797618	Chloroflexi bacterium RBG_13_46_14	Chloroflexi bacterium RBG_13_46_14	unclassified Chloroflexi	unclassified Chloroflexi	unclassified Chloroflexi	unclassified Chloroflexi	Chloroflexi	Bacteria	MGML01000046.1	OGN90214.1	E	E-1	A2158_01925	>A2158_01895(COG3640)	>A2158_01900(COG2759)	>A2158_01905(COG3640)	>A2158_01910(COG0190)	>A2158_01915	>A2158_01920(COG2069)	>A2158_01925(COG1151)	>A2158_01930(COG1614)	>A2158_01935(COG1456)	>A2158_01940
GCA_001796435.1_ASM179643v1_genomic.gff	MAG	1797620	Chloroflexi bacterium RBG_13_48_10	Chloroflexi bacterium RBG_13_48_10	unclassified Chloroflexi	unclassified Chloroflexi	unclassified Chloroflexi	unclassified Chloroflexi	Chloroflexi	Bacteria	MGMN01000177.1	OGN90421.1	E	E-1	A2Y88_00340	<A2Y88_00325(COG1456)	<A2Y88_00330(COG2069)	<A2Y88_00335(COG1614)	<A2Y88_00340(COG1151)	<A2Y88_00345	<A2Y88_00350(COG1670)
GCA_001796435.1_ASM179643v1_genomic.gff	MAG	1797620	Chloroflexi bacterium RBG_13_48_10	Chloroflexi bacterium RBG_13_48_10	unclassified Chloroflexi	unclassified Chloroflexi	unclassified Chloroflexi	unclassified Chloroflexi	Chloroflexi	Bacteria	MGMN01000067.1	OGN92790.1	E	E-2	A2Y88_07875	>A2Y88_07870(COG1142)	>A2Y88_07875(COG1151)	>A2Y88_07880	>A2Y88_07885	>A2Y88_07890(COG1082)
GCA_001796475.1_ASM179647v1_genomic.gff	MAG	1797623	Chloroflexi bacterium RBG_13_50_21	Chloroflexi bacterium RBG_13_50_21	unclassified Chloroflexi	unclassified Chloroflexi	unclassified Chloroflexi	unclassified Chloroflexi	Chloroflexi	Bacteria	MGMQ01000099.1	OGN94823.1	E	E-2	A2Z71_04640	>A2Z71_04635(COG1142)	>A2Z71_04640(COG1151)	>A2Z71_04645(COG1251)	>A2Z71_04650(COG2206)	>A2Z71_04655(COG1082)
GCA_001796495.1_ASM179649v1_genomic.gff	MAG	1797624	Chloroflexi bacterium RBG_13_51_18	Chloroflexi bacterium RBG_13_51_18	unclassified Chloroflexi	unclassified Chloroflexi	unclassified Chloroflexi	unclassified Chloroflexi	Chloroflexi	Bacteria	MGMR01000055.1	OGN97377.1	E	E-1	A2Y89_04550	<A2Y89_04540(COG1456)	<A2Y89_04545(COG1614)	<A2Y89_04550(COG1151)	<A2Y89_04555(COG2069)	<A2Y89_04560	<A2Y89_04565(COG0190)	<A2Y89_04570	<A2Y89_04575(COG3640)	<A2Y89_04580(COG2759)	<A2Y89_04585(COG3640)
GCA_001796515.1_ASM179651v1_genomic.gff	MAG	1797625	Chloroflexi bacterium RBG_13_51_36	Chloroflexi bacterium RBG_13_51_36	unclassified Chloroflexi	unclassified Chloroflexi	unclassified Chloroflexi	unclassified Chloroflexi	Chloroflexi	Bacteria	MGMS01000055.1	OGN95394.1	A	A-1	A2Z77_03945	>A2Z77_03875(COG4585)	<A2Z77_03880(COG3383)	<A2Z77_03885	<A2Z77_03890(COG0685)	<A2Z77_03895	<A2Z77_03900(COG0680)	<A2Z77_03905(COG0374)	<A2Z77_03910(COG1740)	<A2Z77_03915(COG3640)	<A2Z77_03920(COG1894)	<A2Z77_03925(COG1905)	<A2Z77_03930(COG1456)	<A2Z77_03935(COG1614)	<A2Z77_03940(COG1880)	<A2Z77_03945(COG1152)	<A2Z77_03950(COG2069)	<A2Z77_03955(COG1410)	>A2Z77_03960(COG0484)
GCA_001796555.1_ASM179655v1_genomic.gff	MAG	1797627	Chloroflexi bacterium RBG_13_52_12	Chloroflexi bacterium RBG_13_52_12	unclassified Chloroflexi	unclassified Chloroflexi	unclassified Chloroflexi	unclassified Chloroflexi	Chloroflexi	Bacteria	MGMU01000076.1	OGO00310.1	E	E-1	A2Y90_03895	<A2Y90_03855(COG0011)	<A2Y90_03860(COG4887)	>A2Y90_03865(COG3640)	>A2Y90_03870	>A2Y90_03875	>A2Y90_03880(COG0190)	>A2Y90_03885	>A2Y90_03890(COG2069)	>A2Y90_03895(COG1151)	>A2Y90_03900	>A2Y90_03905(COG1456)	>A2Y90_03910(COG1410)	>A2Y90_03915	>A2Y90_03920(COG1905)	>A2Y90_03925
GCA_001796715.1_ASM179671v1_genomic.gff	MAG	1797638	Chloroflexi bacterium RBG_13_68_17	Chloroflexi bacterium RBG_13_68_17	unclassified Chloroflexi	unclassified Chloroflexi	unclassified Chloroflexi	unclassified Chloroflexi	Chloroflexi	Bacteria	MGNF01000043.1	OGO15446.1	E	E-1	A2Y93_07950	<A2Y93_07895(COG1247)	<A2Y93_07900(COG0492)	<A2Y93_07905(COG0281)	<A2Y93_07910(COG1410)	<A2Y93_07915(COG3640)	<A2Y93_07920	<A2Y93_07925(COG3894)	<A2Y93_07930	<A2Y93_07935(COG1456)	<A2Y93_07940(COG2069)	<A2Y93_07945(COG1614)	<A2Y93_07950(COG1151)	<A2Y93_07955(COG2608)	<A2Y93_07960(COG1810)
GCA_001796755.1_ASM179675v1_genomic.gff	MAG	1797642	Chloroflexi bacterium RBG_16_50_11	Chloroflexi bacterium RBG_16_50_11	unclassified Chloroflexi	unclassified Chloroflexi	unclassified Chloroflexi	unclassified Chloroflexi	Chloroflexi	Bacteria	MGNJ01000087.1	OGO18523.1	E	E-1	A2Z15_08045	<A2Z15_08005(COG1028)	<A2Z15_08010	<A2Z15_08015	<A2Z15_08020(COG1905)	<A2Z15_08025	<A2Z15_08030(COG1410)	<A2Z15_08035(COG1456)	<A2Z15_08040	<A2Z15_08045(COG1151)	<A2Z15_08050(COG2069)	<A2Z15_08055
GCA_001796765.1_ASM179676v1_genomic.gff	MAG	1797643	Chloroflexi bacterium RBG_16_50_9	Chloroflexi bacterium RBG_16_50_9	unclassified Chloroflexi	unclassified Chloroflexi	unclassified Chloroflexi	unclassified Chloroflexi	Chloroflexi	Bacteria	MGNK01000134.1	OGO21113.1	E	E-1	A2144_07410	>A2144_07385	>A2144_07390	>A2144_07395	>A2144_07400	>A2144_07405	>A2144_07410(COG1151)	>A2144_07415	>A2144_07420	>A2144_07425
GCA_001796785.1_ASM179678v1_genomic.gff	MAG	1797644	Chloroflexi bacterium RBG_16_51_16	Chloroflexi bacterium RBG_16_51_16	unclassified Chloroflexi	unclassified Chloroflexi	unclassified Chloroflexi	unclassified Chloroflexi	Chloroflexi	Bacteria	MGNL01000094.1	OGO23452.1	E	E-1	A2Y54_10450	<A2Y54_10430(COG2069)	<A2Y54_10435(COG0517)	<A2Y54_10440(COG1614)	<A2Y54_10445	<A2Y54_10450(COG1151)	<A2Y54_10455(COG2608)
GCA_001796835.1_ASM179683v1_genomic.gff	MAG	1797646	Chloroflexi bacterium RBG_16_52_11	Chloroflexi bacterium RBG_16_52_11	unclassified Chloroflexi	unclassified Chloroflexi	unclassified Chloroflexi	unclassified Chloroflexi	Chloroflexi	Bacteria	MGNN01000099.1	OGO25874.1	E	E-1	A2W33_08490	>A2W33_08485(COG2608)	>A2W33_08490(COG1151)	>A2W33_08495(COG1614)	>A2W33_08500(COG2069)
GCA_001796845.1_ASM179684v1_genomic.gff	MAG	1797647	Chloroflexi bacterium RBG_16_54_11	Chloroflexi bacterium RBG_16_54_11	unclassified Chloroflexi	unclassified Chloroflexi	unclassified Chloroflexi	unclassified Chloroflexi	Chloroflexi	Bacteria	MGNO01000136.1	OGO26101.1	E	E-1	A2136_04515	<A2136_04500	<A2136_04505(COG2069)	<A2136_04510	<A2136_04515(COG1151)	<A2136_04520(COG2608)	<A2136_04525(COG1670)	<A2136_04530(COG0680)	<A2136_04535(COG3259)	<A2136_04540(COG1941)	<A2136_04545(COG1908)	<A2136_04550(COG1148)	<A2136_04555	<A2136_04560(COG1150)	<A2136_04565(COG0745)	<A2136_04570(COG0642)	<A2136_04575(COG0642)	<A2136_04580
GCA_001796865.1_ASM179686v1_genomic.gff	MAG	1797649	Chloroflexi bacterium RBG_16_56_11	Chloroflexi bacterium RBG_16_56_11	unclassified Chloroflexi	unclassified Chloroflexi	unclassified Chloroflexi	unclassified Chloroflexi	Chloroflexi	Bacteria	MGNQ01000045.1	OGO30968.1	E	E-1	A2Z29_01080	<A2Z29_01050(COG1894)	<A2Z29_01055(COG1905)	<A2Z29_01060	<A2Z29_01065(COG1410)	<A2Z29_01070(COG1456)	<A2Z29_01075(COG1614)	<A2Z29_01080(COG1151)	<A2Z29_01085(COG2069)	<A2Z29_01090	<A2Z29_01095(COG0190)	<A2Z29_01100	<A2Z29_01105(COG3640)	<A2Z29_01110(COG2759)	<A2Z29_01115(COG3640)	<A2Z29_01120(COG0501)
GCA_001796935.1_ASM179693v1_genomic.gff	MAG	1797656	Chloroflexi bacterium RBG_16_60_22	Chloroflexi bacterium RBG_16_60_22	unclassified Chloroflexi	unclassified Chloroflexi	unclassified Chloroflexi	unclassified Chloroflexi	Chloroflexi	Bacteria	MGNX01000051.1	OGO44413.1	E	E-1	A2Z05_05320	>A2Z05_05285	>A2Z05_05290(COG3640)	>A2Z05_05295	>A2Z05_05300(COG3640)	>A2Z05_05305(COG0190)	>A2Z05_05310	>A2Z05_05315(COG2069)	>A2Z05_05320(COG1151)	>A2Z05_05325(COG1614)	>A2Z05_05330(COG1456)	>A2Z05_05335(COG1410)	>A2Z05_05340	>A2Z05_05345	>A2Z05_05350(COG1905)	>A2Z05_05355(COG1894)	>A2Z05_05360(COG3383)	>A2Z05_05365(COG3383)
GCA_001796965.1_ASM179696v1_genomic.gff	MAG	1797659	Chloroflexi bacterium RBG_16_64_43	Chloroflexi bacterium RBG_16_64_43	unclassified Chloroflexi	unclassified Chloroflexi	unclassified Chloroflexi	unclassified Chloroflexi	Chloroflexi	Bacteria	MGOA01000052.1	OGO49239.1	E	E-1	A2Z30_06135	>A2Z30_06130(COG1810)	>A2Z30_06135(COG1151)	>A2Z30_06140
GCA_001797105.1_ASM179710v1_genomic.gff	MAG	1797671	Chloroflexi bacterium RBG_19FT_COMBO_62_14	Chloroflexi bacterium RBG_19FT_COMBO_62_14	unclassified Chloroflexi	unclassified Chloroflexi	unclassified Chloroflexi	unclassified Chloroflexi	Chloroflexi	Bacteria	MGOM01000123.1	OGO67825.1	E	E-2	A2Z37_07925	>A2Z37_07920(COG1142)	>A2Z37_07925(COG1151)	>A2Z37_07930(COG1251)	<A2Z37_07935(COG3640)
GCA_001797105.1_ASM179710v1_genomic.gff	MAG	1797671	Chloroflexi bacterium RBG_19FT_COMBO_62_14	Chloroflexi bacterium RBG_19FT_COMBO_62_14	unclassified Chloroflexi	unclassified Chloroflexi	unclassified Chloroflexi	unclassified Chloroflexi	Chloroflexi	Bacteria	MGOM01000123.1	OGO67859.1	E	E-1	A2Z37_08140	<A2Z37_08095(COG0492)	<A2Z37_08100(COG0281)	<A2Z37_08105(COG1410)	<A2Z37_08110	<A2Z37_08115(COG3894)	<A2Z37_08120	<A2Z37_08125(COG1456)	<A2Z37_08130(COG2069)	<A2Z37_08135(COG1614)	<A2Z37_08140(COG1151)	<A2Z37_08145(COG1810)	>A2Z37_08150(COG1150)	>A2Z37_08155(COG2048)	>A2Z37_08160(COG1148)	>A2Z37_08165(COG1908)	>A2Z37_08170(COG1941)	>A2Z37_08175(COG3259)	>A2Z37_08180(COG0680)	>A2Z37_08185(COG0664)
GCA_001797185.1_ASM179718v1_genomic.gff	MAG	1797677	Clostridiales bacterium GWB2_37_7	Clostridiales bacterium GWB2_37_7	unclassified Clostridiales	unclassified Clostridiales	Clostridiales	Clostridia	Firmicutes	Bacteria	MGOS01000075.1	OGO77751.1	D	D-1	A2Y23_03905	<A2Y23_03900(COG2846)	>A2Y23_03905(COG1151)	>A2Y23_03910(COG1846)	>A2Y23_03915(COG0534)	>A2Y23_03920	>A2Y23_03925	>A2Y23_03930	>A2Y23_03935	>A2Y23_03940(COG1959)	>A2Y23_03945(COG0031)
GCA_001797235.1_ASM179723v1_genomic.gff	MAG	1797680	Clostridiales bacterium GWD2_32_59	Clostridiales bacterium GWD2_32_59	unclassified Clostridiales	unclassified Clostridiales	Clostridiales	Clostridia	Firmicutes	Bacteria	MGOV01000065.1	OGO84081.1	D	D-2	A2Y22_03450	<A2Y22_03450(COG1151)	>A2Y22_03455(COG0840)
GCA_001797445.1_ASM179744v1_genomic.gff	MAG	1797812	Deltaproteobacteria bacterium GWA2_65_63	Deltaproteobacteria bacterium GWA2_65_63	unclassified Deltaproteobacteria	unclassified Deltaproteobacteria	unclassified Deltaproteobacteria	Deltaproteobacteria	Proteobacteria	Bacteria	MGPO01000084.1	OGP19100.1	F	F-1	A2X90_09960	>A2X90_09955(COG1142)	>A2X90_09960(COG1151)	>A2X90_09965(COG1251)	>A2X90_09970(COG3640)
GCA_001797495.1_ASM179749v1_genomic.gff	MAG	1797816	Deltaproteobacteria bacterium GWC2_42_11	Deltaproteobacteria bacterium GWC2_42_11	unclassified Deltaproteobacteria	unclassified Deltaproteobacteria	unclassified Deltaproteobacteria	Deltaproteobacteria	Proteobacteria	Bacteria	MGPS01000011.1	OGP32043.1	A	A-3	A2073_01285	<A2073_01275(COG2199)	<A2073_01280(COG0409)	<A2073_01285(COG1152)	<A2073_01290(COG0298)	<A2073_01295(COG0375)
GCA_001797665.1_ASM179766v1_genomic.gff	MAG	1797824	Deltaproteobacteria bacterium GWF2_42_12	Deltaproteobacteria bacterium GWF2_42_12	unclassified Deltaproteobacteria	unclassified Deltaproteobacteria	unclassified Deltaproteobacteria	Deltaproteobacteria	Proteobacteria	Bacteria	MGQA01000067.1	OGP47341.1	A	A-3	A2022_02860	>A2022_02860(COG1152)
GCA_001797675.1_ASM179767v1_genomic.gff	MAG	1797825	Deltaproteobacteria bacterium RBG_13_43_22	Deltaproteobacteria bacterium RBG_13_43_22	unclassified Deltaproteobacteria	unclassified Deltaproteobacteria	unclassified Deltaproteobacteria	Deltaproteobacteria	Proteobacteria	Bacteria	MGQB01000002.1	OGP51983.1	E	E-1	A2Y79_11955	<A2Y79_11945(COG1309)	>A2Y79_11950(COG2069)	>A2Y79_11955(COG1151)	>A2Y79_11960(COG1614)	>A2Y79_11965(COG1456)	>A2Y79_11970(COG1410)
GCA_001797695.1_ASM179769v1_genomic.gff	MAG	1797827	Deltaproteobacteria bacterium RBG_13_49_15	Deltaproteobacteria bacterium RBG_13_49_15	unclassified Deltaproteobacteria	unclassified Deltaproteobacteria	unclassified Deltaproteobacteria	Deltaproteobacteria	Proteobacteria	Bacteria	MGQD01000006.1	OGP63706.1	E	E-1	A2V65_08355	>A2V65_08340(COG0427)	>A2V65_08345(COG3894)	>A2V65_08350(COG2069)	>A2V65_08355(COG1151)	>A2V65_08360	>A2V65_08365	>A2V65_08370(COG1456)	>A2V65_08375(COG1410)
GCA_001797745.1_ASM179774v1_genomic.gff	MAG	1797829	Deltaproteobacteria bacterium RBG_13_52_11	Deltaproteobacteria bacterium RBG_13_52_11	unclassified Deltaproteobacteria	unclassified Deltaproteobacteria	unclassified Deltaproteobacteria	Deltaproteobacteria	Proteobacteria	Bacteria	MGQF01000012.1	OGP55901.1	A	A-1	A2Y65_04465	<A2Y65_04455	<A2Y65_04460(COG1880)	<A2Y65_04465(COG1152)	<A2Y65_04470(COG2069)	<A2Y65_04475	<A2Y65_04480(COG3640)	<A2Y65_04485(COG0190)	<A2Y65_04490(COG2759)
GCA_001797785.1_ASM179778v1_genomic.gff	MAG	1797833	Deltaproteobacteria bacterium RBG_13_60_28	Deltaproteobacteria bacterium RBG_13_60_28	unclassified Deltaproteobacteria	unclassified Deltaproteobacteria	unclassified Deltaproteobacteria	Deltaproteobacteria	Proteobacteria	Bacteria	MGQJ01000085.1	OGP70638.1	E	E-2	A2Z73_06665	>A2Z73_06665(COG1151)	>A2Z73_06670(COG3118)	>A2Z73_06675(COG0492)	>A2Z73_06680(COG4105)
GCA_001797815.1_ASM179781v1_genomic.gff	MAG	1797834	Deltaproteobacteria bacterium RBG_13_61_14	Deltaproteobacteria bacterium RBG_13_61_14	unclassified Deltaproteobacteria	unclassified Deltaproteobacteria	unclassified Deltaproteobacteria	Deltaproteobacteria	Proteobacteria	Bacteria	MGQK01000010.1	OGP61460.1	E	E-1	A2V67_12205	>A2V67_12200(COG2069)	>A2V67_12205(COG1151)	>A2V67_12210(COG1614)	>A2V67_12215(COG1456)	>A2V67_12220(COG1410)
GCA_001797865.1_ASM179786v1_genomic.gff	MAG	1797839	Deltaproteobacteria bacterium RBG_16_48_10	Deltaproteobacteria bacterium RBG_16_48_10	unclassified Deltaproteobacteria	unclassified Deltaproteobacteria	unclassified Deltaproteobacteria	Deltaproteobacteria	Proteobacteria	Bacteria	MGQP01000140.1	OGP89105.1	E	E-1	A2156_11640	>A2156_11635	>A2156_11640(COG1151)	>A2156_11645	>A2156_11650	>A2156_11655	>A2156_11660(COG0731)	>A2156_11665	>A2156_11670(COG1149)	>A2156_11675
GCA_001798725.1_ASM179872v1_genomic.gff	MAG	1797903	Deltaproteobacteria bacterium RIFOXYD12_FULL_53_23	Deltaproteobacteria bacterium RIFOXYD12_FULL_53_23	unclassified Deltaproteobacteria	unclassified Deltaproteobacteria	unclassified Deltaproteobacteria	Deltaproteobacteria	Proteobacteria	Bacteria	MGTB01000036.1	OGR06017.1	E	E-3	A2520_09835	<A2520_09810(COG3383)	<A2520_09815(COG0493)	<A2520_09820(COG1456)	<A2520_09825(COG1614)	<A2520_09830(COG2069)	<A2520_09835(COG1151)
GCA_001798765.1_ASM179876v1_genomic.gff	MAG	1797830	Deltaproteobacteria bacterium RBG_13_52_11b	Deltaproteobacteria bacterium RBG_13_52_11b	unclassified Deltaproteobacteria	unclassified Deltaproteobacteria	unclassified Deltaproteobacteria	Deltaproteobacteria	Proteobacteria	Bacteria	MGQG01000093.1	OGP57087.1	E	E-1	A2162_02735	>A2162_02710(COG3894)	>A2162_02715(COG3640)	>A2162_02720(COG0190)	>A2162_02725	>A2162_02730(COG2069)	>A2162_02735(COG1151)	>A2162_02740(COG1614)	>A2162_02745
GCA_001798855.1_ASM179885v1_genomic.gff	MAG	1797840	Deltaproteobacteria bacterium RBG_16_49_23	Deltaproteobacteria bacterium RBG_16_49_23	unclassified Deltaproteobacteria	unclassified Deltaproteobacteria	unclassified Deltaproteobacteria	Deltaproteobacteria	Proteobacteria	Bacteria	MGQQ01000132.1	OGP73965.1	E	E-1	A2V86_07915	<A2V86_07895(COG2852)	>A2V86_07900	>A2V86_07905	>A2V86_07910(COG2069)	>A2V86_07915(COG1151)	>A2V86_07920(COG1614)	>A2V86_07925(COG1456)	>A2V86_07930(COG1410)
GCA_001798855.1_ASM179885v1_genomic.gff	MAG	1797840	Deltaproteobacteria bacterium RBG_16_49_23	Deltaproteobacteria bacterium RBG_16_49_23	unclassified Deltaproteobacteria	unclassified Deltaproteobacteria	unclassified Deltaproteobacteria	Deltaproteobacteria	Proteobacteria	Bacteria	MGQQ01000093.1	OGP75412.1	A	A-1	A2V86_11265	<A2V86_11210(COG1908)	<A2V86_11215(COG1148)	<A2V86_11220(COG1148)	<A2V86_11225	<A2V86_11230(COG3383)	<A2V86_11235(COG1894)	<A2V86_11240(COG1905)	<A2V86_11245(COG1456)	<A2V86_11250(COG1614)	<A2V86_11255(COG1880)	<A2V86_11260(COG1810)	<A2V86_11265(COG1152)	<A2V86_11270(COG2069)	<A2V86_11275(COG1410)	<A2V86_11280(COG3640)	<A2V86_11285(COG0190)	<A2V86_11290(COG3894)
GCA_001798855.1_ASM179885v1_genomic.gff	MAG	1797840	Deltaproteobacteria bacterium RBG_16_49_23	Deltaproteobacteria bacterium RBG_16_49_23	unclassified Deltaproteobacteria	unclassified Deltaproteobacteria	unclassified Deltaproteobacteria	Deltaproteobacteria	Proteobacteria	Bacteria	MGQQ01000084.1	OGP75751.1	G	G-1	A2V86_11385	>A2V86_11370	>A2V86_11375(COG1251)	>A2V86_11380(COG1142)	>A2V86_11385(COG1151)	>A2V86_11390(COG3181)	>A2V86_11395	>A2V86_11400(COG3333)
GCA_001798885.1_ASM179888v1_genomic.gff	MAG	1797846	Deltaproteobacteria bacterium RBG_16_64_85	Deltaproteobacteria bacterium RBG_16_64_85	unclassified Deltaproteobacteria	unclassified Deltaproteobacteria	unclassified Deltaproteobacteria	Deltaproteobacteria	Proteobacteria	Bacteria	MGQW01000014.1	OGP80709.1	F	F-1	A2Z13_10685	<A2Z13_10665(COG0493)	<A2Z13_10670(COG1959)	>A2Z13_10675	>A2Z13_10680(COG0437)	>A2Z13_10685(COG1151)	>A2Z13_10690(COG1251)	>A2Z13_10695(COG3640)
GCA_001799225.1_ASM179922v1_genomic.gff	MAG	1797902	Deltaproteobacteria bacterium RIFOXYD12_FULL_50_9	Deltaproteobacteria bacterium RIFOXYD12_FULL_50_9	unclassified Deltaproteobacteria	unclassified Deltaproteobacteria	unclassified Deltaproteobacteria	Deltaproteobacteria	Proteobacteria	Bacteria	MGTA01000057.1	OGR06630.1	F	F-1	A2511_10030	<A2511_10020(COG2852)	>A2511_10025(COG3183)	>A2511_10030(COG1151)	>A2511_10035(COG1142)	>A2511_10040(COG1251)
GCA_001799275.1_ASM179927v1_genomic.gff	MAG	1797906	Deltaproteobacteria bacterium RIFOXYD12_FULL_57_12	Deltaproteobacteria bacterium RIFOXYD12_FULL_57_12	unclassified Deltaproteobacteria	unclassified Deltaproteobacteria	unclassified Deltaproteobacteria	Deltaproteobacteria	Proteobacteria	Bacteria	MGTE01000052.1	OGQ97224.1	E	E-3	A2521_15695	>A2521_15690(COG0190)	>A2521_15695(COG1151)	>A2521_15700	>A2521_15705(COG2069)
GCA_001799285.1_ASM179928v1_genomic.gff	MAG	1797905	Deltaproteobacteria bacterium RIFOXYD12_FULL_56_24	Deltaproteobacteria bacterium RIFOXYD12_FULL_56_24	unclassified Deltaproteobacteria	unclassified Deltaproteobacteria	unclassified Deltaproteobacteria	Deltaproteobacteria	Proteobacteria	Bacteria	MGTD01000008.1	OGQ88604.1	E	E-3	A2512_07165	>A2512_07160(COG0190)	>A2512_07165(COG1151)	>A2512_07170(COG2069)	>A2512_07175(COG1614)	>A2512_07180(COG1456)	>A2512_07185(COG0493)	>A2512_07190(COG3383)	>A2512_07195(COG1148)	>A2512_07200(COG1148)	>A2512_07205(COG1908)	>A2512_07210(COG1908)
GCA_001799365.1_ASM179936v1_genomic.gff	MAG	1797913	Desulfobacterales bacterium GWB2_56_26	Desulfobacterales bacterium GWB2_56_26	unclassified Desulfobacterales	unclassified Desulfobacterales	Desulfobacterales	Deltaproteobacteria	Proteobacteria	Bacteria	MGTI01000045.1	OGR19116.1	E	E-1	A2X81_18470	>A2X81_18430(COG3894)	>A2X81_18435(COG2069)	>A2X81_18440(COG1151)	>A2X81_18445(COG1614)	>A2X81_18450(COG1456)	>A2X81_18455(COG1410)	>A2X81_18460	>A2X81_18465(COG3640)	>A2X81_18470(COG1151)	>A2X81_18475	>A2X81_18480	>A2X81_18485	>A2X81_18490	>A2X81_18495(COG0840)
GCA_001799395.1_ASM179939v1_genomic.gff	MAG	1797914	Desulfobacterales bacterium RIFOXYA12_FULL_46_15	Desulfobacterales bacterium RIFOXYA12_FULL_46_15	unclassified Desulfobacterales	unclassified Desulfobacterales	Desulfobacterales	Deltaproteobacteria	Proteobacteria	Bacteria	MGTJ01000056.1	OGR26615.1	E	E-1	A2277_06395	<A2277_06390	<A2277_06395(COG1151)	<A2277_06400(COG2069)	>A2277_06405(COG2759)	<A2277_06410(COG0190)	<A2277_06415(COG3404)
GCA_001799395.1_ASM179939v1_genomic.gff	MAG	1797914	Desulfobacterales bacterium RIFOXYA12_FULL_46_15	Desulfobacterales bacterium RIFOXYA12_FULL_46_15	unclassified Desulfobacterales	unclassified Desulfobacterales	Desulfobacterales	Deltaproteobacteria	Proteobacteria	Bacteria	MGTJ01000030.1	OGR27649.1	E	E-1	A2277_15250	<A2277_15250(COG1151)
GCA_001799425.1_ASM179942v1_genomic.gff	MAG	1797911	Desulfobacula sp. RIFOXYA12_FULL_46_16	Desulfobacula sp. RIFOXYA12_FULL_46_16	Desulfobacula	Desulfobacteraceae	Desulfobacterales	Deltaproteobacteria	Proteobacteria	Bacteria	MGTL01000037.1	OGR21541.1	E	E-1	A3J85_02645	>A3J85_02620(COG0484)	>A3J85_02625(COG3404)	>A3J85_02630(COG0190)	<A3J85_02635(COG2759)	>A3J85_02640(COG2069)	>A3J85_02645(COG1151)	>A3J85_02650(COG1614)	>A3J85_02655(COG1456)
GCA_001799535.1_ASM179953v1_genomic.gff	MAG	1797918	Desulfuromonadales bacterium GWD2_61_12	Desulfuromonadales bacterium GWD2_61_12	unclassified Desulfuromonadales	unclassified Desulfuromonadales	Desulfuromonadales	Deltaproteobacteria	Proteobacteria	Bacteria	MGTQ01000113.1	OGR33759.1	E	E-1	A2091_05090	<A2091_05090(COG1151)
GCA_001800605.1_ASM180060v1_genomic.gff	MAG	1797973	Elusimicrobia bacterium RIFOXYD2_FULL_34_15	Elusimicrobia bacterium RIFOXYD2_FULL_34_15	unclassified Elusimicrobia	unclassified Elusimicrobia	unclassified Elusimicrobia	unclassified Elusimicrobia	Elusimicrobia	Bacteria	MGVS01000105.1	OGS43404.1	E	E-1	A2539_03115	>A2539_03110(COG3640)	>A2539_03115(COG1151)	>A2539_03120(COG1142)	>A2539_03125(COG1251)	>A2539_03130(COG1614)	>A2539_03135(COG1456)	>A2539_03140(COG3894)	>A2539_03145(COG2069)	>A2539_03150
GCA_001800635.1_ASM180063v1_genomic.gff	MAG	1797974	Elusimicrobia bacterium RIFOXYD2_FULL_34_30	Elusimicrobia bacterium RIFOXYD2_FULL_34_30	unclassified Elusimicrobia	unclassified Elusimicrobia	unclassified Elusimicrobia	unclassified Elusimicrobia	Elusimicrobia	Bacteria	MGVT01000114.1	OGS38096.1	E	E-1	A2551_02685	>A2551_02680(COG3640)	>A2551_02685(COG1151)	>A2551_02690(COG1142)	>A2551_02695(COG1251)	>A2551_02700(COG1614)	>A2551_02705(COG1456)	>A2551_02710(COG3894)	>A2551_02715(COG2069)	>A2551_02720(COG0282)	>A2551_02725(COG1410)	>A2551_02730(COG2759)
GCA_001800675.1_ASM180067v1_genomic.gff	MAG	1797977	Euryarchaeota archaeon RBG_13_57_23	Euryarchaeota archaeon RBG_13_57_23	unclassified Euryarchaeota	unclassified Euryarchaeota	unclassified Euryarchaeota	unclassified Euryarchaeota	Euryarchaeota	Archaea	MGVW01000027.1	OGS44063.1	F	others	A3K76_00490	>A3K76_00470(COG4747)	>A3K76_00475	>A3K76_00480(COG3640)	>A3K76_00485	>A3K76_00490(COG1151)
GCA_001800735.1_ASM180073v1_genomic.gff	MAG	1797979	Euryarchaeota archaeon RBG_16_62_10	Euryarchaeota archaeon RBG_16_62_10	unclassified Euryarchaeota	unclassified Euryarchaeota	unclassified Euryarchaeota	unclassified Euryarchaeota	Euryarchaeota	Archaea	MGVY01000116.1	OGS41472.1	F	others	A3K67_04030	<A3K67_04025(COG2069)	<A3K67_04030(COG1614)	<A3K67_04035(COG3640)
GCA_001803205.1_ASM180320v1_genomic.gff	MAG	1798570	Lentisphaerae bacterium GWF2_38_69	Lentisphaerae bacterium GWF2_38_69	unclassified Lentisphaerae	unclassified Lentisphaerae	unclassified Lentisphaerae	unclassified Lentisphaerae	Lentisphaerae	Bacteria	MHBE01000031.1	OGV19598.1	B	B-1	A2X47_00525	>A2X47_00525(COG1151)	>A2X47_00530(COG0662)	>A2X47_00535(COG0679)	>A2X47_00540(COG4251)
GCA_001803235.1_ASM180323v1_genomic.gff	MAG	1798577	Lentisphaerae bacterium RIFOXYA12_64_32	Lentisphaerae bacterium RIFOXYA12_64_32	unclassified Lentisphaerae	unclassified Lentisphaerae	unclassified Lentisphaerae	unclassified Lentisphaerae	Lentisphaerae	Bacteria	MHBL01000492.1	OGV61862.1	E	E-1	A3K18_06630	<A3K18_06600(COG1410)	<A3K18_06605(COG2069)	<A3K18_06610(COG3640)	<A3K18_06615(COG3894)	<A3K18_06620(COG1456)	<A3K18_06625(COG1614)	<A3K18_06630(COG1151)	<A3K18_06635(COG3640)	<A3K18_06640(COG0685)	<A3K18_06645(COG2759)
GCA_001803255.1_ASM180325v1_genomic.gff	MAG	1798579	Lentisphaerae bacterium RIFOXYA12_FULL_60_10	Lentisphaerae bacterium RIFOXYA12_FULL_60_10	unclassified Lentisphaerae	unclassified Lentisphaerae	unclassified Lentisphaerae	unclassified Lentisphaerae	Lentisphaerae	Bacteria	MHBN01000024.1	OGV74571.1	E	E-1	A2269_09410	>A2269_09400	>A2269_09405(COG3640)	>A2269_09410(COG1151)	>A2269_09415(COG0437)	>A2269_09420(COG1894)	>A2269_09425(COG1034)	>A2269_09430(COG1614)	>A2269_09435(COG1456)	>A2269_09440
GCA_001803315.1_ASM180331v1_genomic.gff	MAG	1798582	Lentisphaerae bacterium RIFOXYC12_FULL_60_16	Lentisphaerae bacterium RIFOXYC12_FULL_60_16	unclassified Lentisphaerae	unclassified Lentisphaerae	unclassified Lentisphaerae	unclassified Lentisphaerae	Lentisphaerae	Bacteria	MHBQ01000059.1	OGV65861.1	E	E-1	A2498_09985	<A2498_09910(COG0711)	<A2498_09915(COG0636)	<A2498_09920(COG0636)	<A2498_09925(COG0356)	<A2498_09930	<A2498_09935	<A2498_09940(COG1410)	<A2498_09945(COG2069)	<A2498_09950(COG3640)	<A2498_09955(COG3894)	<A2498_09960(COG1456)	<A2498_09965(COG1614)	<A2498_09970(COG1034)	<A2498_09975(COG1894)	<A2498_09980(COG0437)	<A2498_09985(COG1151)	<A2498_09990(COG3640)	<A2498_09995(COG0685)	<A2498_10000	<A2498_10005(COG2759)
GCA_001803525.1_ASM180352v1_genomic.gff	MAG	1801689	Nitrospinae bacterium RIFCSPLOWO2_12_39_15	Nitrospinae bacterium RIFCSPLOWO2_12_39_15	unclassified Nitrospinae	unclassified Nitrospinae	unclassified Nitrospinae	unclassified Nitrospinae	Nitrospinae	Bacteria	MHDN01000062.1	OGW09333.1	A	A-3	A2W75_05570	>A2W75_05570(COG1152)	>A2W75_05575(COG0742)
GCA_001803565.1_ASM180356v1_genomic.gff	MAG	1801687	Nitrospinae bacterium RIFCSPLOWO2_12_FULL_45_22	Nitrospinae bacterium RIFCSPLOWO2_12_FULL_45_22	unclassified Nitrospinae	unclassified Nitrospinae	unclassified Nitrospinae	unclassified Nitrospinae	Nitrospinae	Bacteria	MHDQ01000157.1	OGW16050.1	A	A-4	A3G93_01930	<A3G93_01875	<A3G93_01880(COG2120)	<A3G93_01885(COG0438)	<A3G93_01890(COG5653)	<A3G93_01895	<A3G93_01900	<A3G93_01905(COG1456)	<A3G93_01910(COG1153)	<A3G93_01915(COG1029)	<A3G93_01920	<A3G93_01925(COG1880)	<A3G93_01930(COG1152)	<A3G93_01935	<A3G93_01940(COG1239)	<A3G93_01945(COG1614)	<A3G93_01950(COG1614)	<A3G93_01955(COG3640)	<A3G93_01960(COG1239)
GCA_001803565.1_ASM180356v1_genomic.gff	MAG	1801687	Nitrospinae bacterium RIFCSPLOWO2_12_FULL_45_22	Nitrospinae bacterium RIFCSPLOWO2_12_FULL_45_22	unclassified Nitrospinae	unclassified Nitrospinae	unclassified Nitrospinae	unclassified Nitrospinae	Nitrospinae	Bacteria	MHDQ01000312.1	OGW12414.1	F	F-1	A3G93_15790	>A3G93_15780(COG3640)	>A3G93_15785(COG0437)	>A3G93_15790(COG1151)	>A3G93_15795(COG1905)	>A3G93_15800(COG1894)	>A3G93_15805(COG1034)	>A3G93_15810(COG2109)	>A3G93_15815
GCA_001803575.1_ASM180357v1_genomic.gff	MAG	1801684	Nitrospinae bacterium RIFCSPLOWO2_02_39_17	Nitrospinae bacterium RIFCSPLOWO2_02_39_17	unclassified Nitrospinae	unclassified Nitrospinae	unclassified Nitrospinae	unclassified Nitrospinae	Nitrospinae	Bacteria	MHDL01000025.1	OGW06734.1	A	A-3	A2Z59_11955	>A2Z59_11935(COG0150)	>A2Z59_11940	>A2Z59_11945	>A2Z59_11950	>A2Z59_11955(COG1152)	>A2Z59_11960(COG0742)
GCA_001803645.1_ASM180364v1_genomic.gff	MAG	1801694	Nitrospirae bacterium GWC2_42_7	Nitrospirae bacterium GWC2_42_7	unclassified Nitrospirae	unclassified Nitrospirae	unclassified Nitrospirae	unclassified Nitrospirae	Nitrospirae	Bacteria	MHDW01000125.1	OGW28063.1	E	E-1	A2X59_03140	>A2X59_03135	>A2X59_03140(COG1151)	>A2X59_03145(COG1905)	>A2X59_03150	>A2X59_03155(COG1149)	>A2X59_03160	>A2X59_03165	>A2X59_03170(COG2200)
GCA_001803685.1_ASM180368v1_genomic.gff	MAG	1801695	Nitrospirae bacterium GWC2_46_6	Nitrospirae bacterium GWC2_46_6	unclassified Nitrospirae	unclassified Nitrospirae	unclassified Nitrospirae	unclassified Nitrospirae	Nitrospirae	Bacteria	MHDX01000145.1	OGW19200.1	E	E-1	A2077_00195	>A2077_00190	>A2077_00195(COG1151)	>A2077_00200	>A2077_00205	>A2077_00210(COG1894)	>A2077_00215
GCA_001803765.1_ASM180376v1_genomic.gff	MAG	1801701	Nitrospirae bacterium GWD2_57_9	Nitrospirae bacterium GWD2_57_9	unclassified Nitrospirae	unclassified Nitrospirae	unclassified Nitrospirae	unclassified Nitrospirae	Nitrospirae	Bacteria	MHED01000166.1	OGW37638.1	E	E-3	A2010_13270	<A2010_13270(COG1151)	<A2010_13275(COG3279)	<A2010_13280(COG0466)	<A2010_13285
GCA_001803765.1_ASM180376v1_genomic.gff	MAG	1801701	Nitrospirae bacterium GWD2_57_9	Nitrospirae bacterium GWD2_57_9	unclassified Nitrospirae	unclassified Nitrospirae	unclassified Nitrospirae	unclassified Nitrospirae	Nitrospirae	Bacteria	MHED01000108.1	OGW39405.1	F	F-1	A2010_14410	>A2010_14410(COG1151)
GCA_001803765.1_ASM180376v1_genomic.gff	MAG	1801701	Nitrospirae bacterium GWD2_57_9	Nitrospirae bacterium GWD2_57_9	unclassified Nitrospirae	unclassified Nitrospirae	unclassified Nitrospirae	unclassified Nitrospirae	Nitrospirae	Bacteria	MHED01000146.1	OGW38306.1	E	E-1	A2010_17910	>A2010_17885	>A2010_17890(COG1905)	>A2010_17895(COG1894)	>A2010_17900(COG1145)	>A2010_17905	>A2010_17910(COG1151)	>A2010_17915(COG1272)	>A2010_17920	>A2010_17925(COG4972)	>A2010_17930	>A2010_17935	>A2010_17940(COG3167)
GCA_001803785.1_ASM180378v1_genomic.gff	MAG	1801705	Nitrospirae bacterium RBG_13_43_8	Nitrospirae bacterium RBG_13_43_8	unclassified Nitrospirae	unclassified Nitrospirae	unclassified Nitrospirae	unclassified Nitrospirae	Nitrospirae	Bacteria	MHEH01000153.1	OGW53063.1	E	E-1	A2Y81_09295	<A2Y81_09275(COG1034)	<A2Y81_09280(COG3383)	<A2Y81_09285(COG1894)	<A2Y81_09290(COG1905)	<A2Y81_09295(COG1151)	<A2Y81_09300	<A2Y81_09305
GCA_001803815.1_ASM180381v1_genomic.gff	MAG	1801709	Nitrospirae bacterium RBG_19FT_COMBO_42_15	Nitrospirae bacterium RBG_19FT_COMBO_42_15	unclassified Nitrospirae	unclassified Nitrospirae	unclassified Nitrospirae	unclassified Nitrospirae	Nitrospirae	Bacteria	MHEL01000139.1	OGW49175.1	E	E-1	A2Z50_08075	<A2Z50_08055	<A2Z50_08060(COG0425)	<A2Z50_08065	<A2Z50_08070(COG1104)	<A2Z50_08075(COG1151)	<A2Z50_08080(COG4231)
GCA_001803975.1_ASM180397v1_genomic.gff	MAG	1801814	Omnitrophica bacterium GWA2_41_15	Omnitrophica bacterium GWA2_41_15	unclassified Candidatus Omnitrophica	unclassified Candidatus Omnitrophica	unclassified Candidatus Omnitrophica	unclassified Candidatus Omnitrophica	Candidatus Omnitrophica	Bacteria	MHEZ01000013.1	OGW71456.1	E	E-1	A2047_05395	>A2047_05320(COG1158)	>A2047_05325(COG0254)	>A2047_05330(COG0216)	>A2047_05335(COG2890)	>A2047_05340(COG0766)	>A2047_05345(COG0228)	>A2047_05350(COG0336)	>A2047_05355(COG0335)	>A2047_05360(COG0164)	>A2047_05365(COG0792)	>A2047_05370(COG2759)	>A2047_05375(COG3404)	>A2047_05380(COG0190)	>A2047_05385(COG0685)	>A2047_05390(COG3640)	>A2047_05395(COG1151)	>A2047_05400(COG0437)	>A2047_05405(COG1251)	>A2047_05410
GCA_001804065.1_ASM180406v1_genomic.gff	MAG	1801821	Omnitrophica bacterium RIFCSPHIGHO2_02_FULL_46_20	Omnitrophica bacterium RIFCSPHIGHO2_02_FULL_46_20	unclassified Candidatus Omnitrophica	unclassified Candidatus Omnitrophica	unclassified Candidatus Omnitrophica	unclassified Candidatus Omnitrophica	Candidatus Omnitrophica	Bacteria	MHFG01000011.1	OGW78507.1	E	E-1	A3C51_02720	<A3C51_02700	<A3C51_02705(COG1614)	<A3C51_02710(COG1251)	<A3C51_02715(COG0437)	<A3C51_02720(COG1151)	<A3C51_02725(COG3640)	<A3C51_02730(COG0685)	<A3C51_02735(COG0190)	<A3C51_02740(COG3404)
GCA_001804165.1_ASM180416v1_genomic.gff	MAG	1801826	Omnitrophica bacterium RIFCSPLOWO2_01_FULL_45_10	Omnitrophica bacterium RIFCSPLOWO2_01_FULL_45_10	unclassified Candidatus Omnitrophica	unclassified Candidatus Omnitrophica	unclassified Candidatus Omnitrophica	unclassified Candidatus Omnitrophica	Candidatus Omnitrophica	Bacteria	MHFL01000046.1	OGW83710.1	E	E-1	A2987_05110	<A2987_05090(COG1456)	<A2987_05095(COG1614)	<A2987_05100(COG1251)	<A2987_05105(COG0437)	<A2987_05110(COG1151)	<A2987_05115(COG3640)	<A2987_05120(COG0685)	<A2987_05125(COG0190)	<A2987_05130(COG3404)	<A2987_05135(COG2759)	<A2987_05140(COG0164)	<A2987_05145(COG0335)	<A2987_05150(COG0336)	<A2987_05155(COG0228)	<A2987_05160(COG0766)	<A2987_05165(COG2890)	<A2987_05170(COG0216)	<A2987_05175(COG0254)	<A2987_05180	<A2987_05185(COG0237)
GCA_001804305.1_ASM180430v1_genomic.gff	MAG	1801833	Omnitrophica bacterium RIFCSPLOWO2_12_FULL_45_13	Omnitrophica bacterium RIFCSPLOWO2_12_FULL_45_13	unclassified Candidatus Omnitrophica	unclassified Candidatus Omnitrophica	unclassified Candidatus Omnitrophica	unclassified Candidatus Omnitrophica	Candidatus Omnitrophica	Bacteria	MHFS01000052.1	OGW93458.1	E	E-1	A3G36_04100	<A3G36_04060(COG1410)	<A3G36_04065(COG2069)	<A3G36_04070(COG3640)	<A3G36_04075(COG3894)	<A3G36_04080(COG1456)	<A3G36_04085(COG1614)	<A3G36_04090(COG1251)	<A3G36_04095(COG0437)	<A3G36_04100(COG1151)	<A3G36_04105(COG3640)	<A3G36_04110(COG0685)	<A3G36_04115(COG0190)	<A3G36_04120(COG3404)	<A3G36_04125
GCA_001804805.1_ASM180480v1_genomic.gff	MAG	1798573	Lentisphaerae bacterium GWF2_49_21	Lentisphaerae bacterium GWF2_49_21	unclassified Lentisphaerae	unclassified Lentisphaerae	unclassified Lentisphaerae	unclassified Lentisphaerae	Lentisphaerae	Bacteria	MHBH01000077.1	OGV36722.1	E	E-1	A2X48_17150	>A2X48_17125(COG0646)	>A2X48_17130	>A2X48_17135(COG3640)	>A2X48_17140	>A2X48_17145(COG3640)	>A2X48_17150(COG1151)	>A2X48_17155(COG1614)	>A2X48_17160(COG1456)	>A2X48_17165(COG3894)	>A2X48_17170
GCA_001804815.1_ASM180481v1_genomic.gff	MAG	1798574	Lentisphaerae bacterium GWF2_50_93	Lentisphaerae bacterium GWF2_50_93	unclassified Lentisphaerae	unclassified Lentisphaerae	unclassified Lentisphaerae	unclassified Lentisphaerae	Lentisphaerae	Bacteria	MHBI01000101.1	OGV53825.1	E	E-1	A2X45_08515	>A2X45_08490(COG0646)	>A2X45_08495	>A2X45_08500(COG3640)	>A2X45_08505	>A2X45_08510(COG3640)	>A2X45_08515(COG1151)	>A2X45_08520(COG1614)	>A2X45_08525	>A2X45_08530(COG1456)
GCA_001804905.1_ASM180490v1_genomic.gff	MAG	1801680	Nitrospinae bacterium RIFCSPHIGHO2_02_39_11	Nitrospinae bacterium RIFCSPHIGHO2_02_39_11	unclassified Nitrospinae	unclassified Nitrospinae	unclassified Nitrospinae	unclassified Nitrospinae	Nitrospinae	Bacteria	MHDH01000077.1	OGV97264.1	A	A-3	A2W53_08630	<A2W53_08625(COG0742)	<A2W53_08630(COG1152)	<A2W53_08635	<A2W53_08640	<A2W53_08645	<A2W53_08650(COG0150)
GCA_001804965.1_ASM180496v1_genomic.gff	MAG	1801683	Nitrospinae bacterium RIFCSPLOWO2_01_FULL_39_10	Nitrospinae bacterium RIFCSPLOWO2_01_FULL_39_10	unclassified Nitrospinae	unclassified Nitrospinae	unclassified Nitrospinae	unclassified Nitrospinae	Nitrospinae	Bacteria	MHDK01000181.1	OGW01200.1	A	A-3	A2889_02080	<A2889_02080(COG1152)	<A2889_02085(COG0150)
GCA_001805005.1_ASM180500v1_genomic.gff	MAG	1801690	Nitrospinae bacterium RIFCSPLOWO2_12_39_16	Nitrospinae bacterium RIFCSPLOWO2_12_39_16	unclassified Nitrospinae	unclassified Nitrospinae	unclassified Nitrospinae	unclassified Nitrospinae	Nitrospinae	Bacteria	MHDO01000045.1	OGW12281.1	A	A-3	A2W77_00665	<A2W77_00635(COG1381)	<A2W77_00640	<A2W77_00645(COG1234)	<A2W77_00650(COG2114)	<A2W77_00655(COG0159)	<A2W77_00660	<A2W77_00665(COG1152)	<A2W77_00670(COG0150)
GCA_001805055.1_ASM180505v1_genomic.gff	MAG	1801697	Nitrospirae bacterium GWC2_57_13	Nitrospirae bacterium GWC2_57_13	unclassified Nitrospirae	unclassified Nitrospirae	unclassified Nitrospirae	unclassified Nitrospirae	Nitrospirae	Bacteria	MHDZ01000025.1	OGW29307.1	E	E-1	A2X56_13855	<A2X56_13850(COG0789)	<A2X56_13855(COG1151)	<A2X56_13860(COG3383)	<A2X56_13865(COG1145)	<A2X56_13870(COG1894)	<A2X56_13875(COG1905)	<A2X56_13880(COG0493)	<A2X56_13885(COG0543)
GCA_001805105.1_ASM180510v1_genomic.gff	MAG	1801702	Nitrospirae bacterium GWF2_44_13	Nitrospirae bacterium GWF2_44_13	unclassified Nitrospirae	unclassified Nitrospirae	unclassified Nitrospirae	unclassified Nitrospirae	Nitrospirae	Bacteria	MHEE01000015.1	OGW30670.1	E	E-1	A2X54_04955	>A2X54_04935(COG1410)	>A2X54_04940(COG2069)	>A2X54_04945(COG1456)	>A2X54_04950(COG1614)	>A2X54_04955(COG1151)	>A2X54_04960(COG1905)	>A2X54_04965(COG1894)	>A2X54_04970(COG1149)	>A2X54_04975(COG1034)
GCA_001805125.1_ASM180512v1_genomic.gff	MAG	1801703	Nitrospirae bacterium RBG_13_39_12	Nitrospirae bacterium RBG_13_39_12	unclassified Nitrospirae	unclassified Nitrospirae	unclassified Nitrospirae	unclassified Nitrospirae	Nitrospirae	Bacteria	MHEF01000031.1	OGW40610.1	E	E-1	A2Y97_05150	<A2Y97_05075(COG1682)	<A2Y97_05080(COG0529)	<A2Y97_05085(COG0677)	<A2Y97_05090	<A2Y97_05095(COG1434)	<A2Y97_05100	<A2Y97_05105(COG1032)	<A2Y97_05110(COG2226)	<A2Y97_05115(COG1215)	<A2Y97_05120(COG1354)	<A2Y97_05125(COG3383)	<A2Y97_05130(COG1149)	<A2Y97_05135(COG1894)	<A2Y97_05140	<A2Y97_05145(COG1905)	<A2Y97_05150(COG1151)	<A2Y97_05155(COG1614)	<A2Y97_05160(COG1456)	<A2Y97_05165(COG2069)	<A2Y97_05170(COG1410)
GCA_001805135.1_ASM180513v1_genomic.gff	MAG	1801704	Nitrospirae bacterium RBG_13_41_22	Nitrospirae bacterium RBG_13_41_22	unclassified Nitrospirae	unclassified Nitrospirae	unclassified Nitrospirae	unclassified Nitrospirae	Nitrospirae	Bacteria	MHEG01000115.1	OGW45103.1	E	E-1	A2Y66_06190	<A2Y66_06185	<A2Y66_06190(COG1151)	<A2Y66_06195(COG1614)	<A2Y66_06200(COG1456)	<A2Y66_06205(COG2069)	<A2Y66_06210(COG1410)
GCA_001805445.1_ASM180544v1_genomic.gff	MAG	1801847	Omnitrophica WOR_2 bacterium GWF2_43_52	Omnitrophica WOR_2 bacterium GWF2_43_52	unclassified Candidatus Omnitrophica	unclassified Candidatus Omnitrophica	unclassified Candidatus Omnitrophica	unclassified Candidatus Omnitrophica	Candidatus Omnitrophica	Bacteria	MHGF01000018.1	OGX21753.1	E	E-1	A2Y00_04495	<A2Y00_04475(COG5010)	<A2Y00_04480(COG1614)	<A2Y00_04485(COG1251)	<A2Y00_04490(COG1142)	<A2Y00_04495(COG1151)	<A2Y00_04500(COG3640)	<A2Y00_04505(COG0685)	<A2Y00_04510	<A2Y00_04515	<A2Y00_04520(COG0190)	<A2Y00_04525(COG3404)	<A2Y00_04530	<A2Y00_04535
GCA_001805895.1_ASM180589v1_genomic.gff	MAG	1801870	Omnitrophica WOR_2 bacterium RIFCSPLOWO2_12_FULL_51_8	Omnitrophica WOR_2 bacterium RIFCSPLOWO2_12_FULL_51_8	unclassified Candidatus Omnitrophica	unclassified Candidatus Omnitrophica	unclassified Candidatus Omnitrophica	unclassified Candidatus Omnitrophica	Candidatus Omnitrophica	Bacteria	MHHD01000011.1	OGX46221.1	D	others	A3G38_01835	>A3G38_01820(COG0474)	>A3G38_01825(COG2217)	>A3G38_01830(COG1959)	>A3G38_01835(COG1151)	>A3G38_01840(COG1142)	>A3G38_01845(COG1251)	>A3G38_01850(COG2461)	>A3G38_01855(COG3945)	>A3G38_01860	>A3G38_01865
GCA_001806025.1_ASM180602v1_genomic.gff	MAG	1801876	Omnitrophica WOR_2 bacterium RIFOXYB2_FULL_45_11	Omnitrophica WOR_2 bacterium RIFOXYB2_FULL_45_11	unclassified Candidatus Omnitrophica	unclassified Candidatus Omnitrophica	unclassified Candidatus Omnitrophica	unclassified Candidatus Omnitrophica	Candidatus Omnitrophica	Bacteria	MHHJ01000047.1	OGX53131.1	E	E-1	A2321_03205	<A2321_03155	<A2321_03160(COG0254)	<A2321_03165	<A2321_03170(COG0237)	<A2321_03175(COG0297)	<A2321_03180	<A2321_03185	<A2321_03190(COG1614)	<A2321_03195(COG1251)	<A2321_03200(COG1142)	<A2321_03205(COG1151)	<A2321_03210(COG3640)	<A2321_03215(COG0685)	<A2321_03220(COG0190)	<A2321_03225(COG3404)	<A2321_03230
GCA_001824525.1_ASM182452v1_genomic.gff	MAG	1801949	Planctomycetes bacterium GWA2_50_13	Planctomycetes bacterium GWA2_50_13	unclassified Planctomycetes	unclassified Planctomycetes	unclassified Planctomycetes	unclassified Planctomycetes	Planctomycetes	Bacteria	MHXR01000037.1	OHB38240.1	E	E-1	A2060_00600	<A2060_00595	<A2060_00600(COG1151)
GCA_001824605.1_ASM182460v1_genomic.gff	MAG	1801956	Planctomycetes bacterium GWF2_40_8	Planctomycetes bacterium GWF2_40_8	unclassified Planctomycetes	unclassified Planctomycetes	unclassified Planctomycetes	unclassified Planctomycetes	Planctomycetes	Bacteria	MHXY01000090.1	OHB47451.1	F	F-1	A2106_02650	<A2106_02650(COG1151)
GCA_001824635.1_ASM182463v1_genomic.gff	MAG	1801959	Planctomycetes bacterium GWF2_50_10	Planctomycetes bacterium GWF2_50_10	unclassified Planctomycetes	unclassified Planctomycetes	unclassified Planctomycetes	unclassified Planctomycetes	Planctomycetes	Bacteria	MHYB01000083.1	OHB54507.1	E	E-1	A2Y07_01475	<A2Y07_01470(COG1614)	<A2Y07_01475(COG1151)	<A2Y07_01480	<A2Y07_01485	<A2Y07_01490(COG3640)	<A2Y07_01495	<A2Y07_01500(COG0646)
GCA_001825665.1_ASM182566v1_genomic.gff	MAG	1801957	Planctomycetes bacterium GWF2_41_51	Planctomycetes bacterium GWF2_41_51	unclassified Planctomycetes	unclassified Planctomycetes	unclassified Planctomycetes	unclassified Planctomycetes	Planctomycetes	Bacteria	MHXZ01000068.1	OHB50731.1	E	E-1	A2Y10_18725	<A2Y10_18705	<A2Y10_18710(COG3894)	<A2Y10_18715(COG1456)	<A2Y10_18720(COG1614)	<A2Y10_18725(COG1151)	<A2Y10_18730(COG3640)	<A2Y10_18735	<A2Y10_18740(COG3640)	<A2Y10_18745	<A2Y10_18750(COG0646)
GCA_001828245.1_ASM182824v1_genomic.gff	MAG	1801964	Planctomycetes bacterium RBG_13_62_9	Planctomycetes bacterium RBG_13_62_9	unclassified Planctomycetes	unclassified Planctomycetes	unclassified Planctomycetes	unclassified Planctomycetes	Planctomycetes	Bacteria	MHYG01000260.1	OHB63585.1	E	E-1	A2Y77_05175	<A2Y77_05170(COG1614)	<A2Y77_05175(COG1151)	<A2Y77_05180(COG3640)	<A2Y77_05185
GCA_001828335.1_ASM182833v1_genomic.gff	MAG	1801971	Planctomycetes bacterium RBG_16_64_12	Planctomycetes bacterium RBG_16_64_12	unclassified Planctomycetes	unclassified Planctomycetes	unclassified Planctomycetes	unclassified Planctomycetes	Planctomycetes	Bacteria	MHYN01000442.1	OHB78495.1	E	E-1	A2V98_03595	>A2V98_03590(COG3640)	>A2V98_03595(COG1151)	>A2V98_03600(COG0437)	>A2V98_03605(COG1905)	>A2V98_03610	>A2V98_03615	>A2V98_03620(COG1905)	>A2V98_03625	>A2V98_03630(COG1034)	>A2V98_03635	>A2V98_03640(COG1456)	>A2V98_03645(COG3894)	>A2V98_03650(COG3640)	>A2V98_03655(COG2069)	>A2V98_03660(COG1410)	>A2V98_03665	>A2V98_03670
GCA_001828415.1_ASM182841v1_genomic.gff	MAG	1801976	Planctomycetes bacterium RIFCSPHIGHO2_02_FULL_52_58	Planctomycetes bacterium RIFCSPHIGHO2_02_FULL_52_58	unclassified Planctomycetes	unclassified Planctomycetes	unclassified Planctomycetes	unclassified Planctomycetes	Planctomycetes	Bacteria	MHYS01000048.1	OHB90486.1	E	E-1	A3D89_03970	>A3D89_03950(COG0535)	>A3D89_03955(COG1032)	>A3D89_03960(COG0019)	>A3D89_03965(COG1032)	>A3D89_03970(COG1151)	>A3D89_03975(COG1614)
GCA_001828515.1_ASM182851v1_genomic.gff	MAG	1801974	Planctomycetes bacterium RIFCSPHIGHO2_02_FULL_40_12	Planctomycetes bacterium RIFCSPHIGHO2_02_FULL_40_12	unclassified Planctomycetes	unclassified Planctomycetes	unclassified Planctomycetes	unclassified Planctomycetes	Planctomycetes	Bacteria	MHYQ01000043.1	OHB89343.1	E	E-1	A3D13_04895	>A3D13_04890(COG3640)	>A3D13_04895(COG1151)	>A3D13_04900(COG1614)	>A3D13_04905(COG0740)	>A3D13_04910(COG1456)	>A3D13_04915(COG3894)	>A3D13_04920(COG3640)
GCA_001828595.1_ASM182859v1_genomic.gff	MAG	1801983	Planctomycetes bacterium RIFCSPLOWO2_12_FULL_40_19	Planctomycetes bacterium RIFCSPLOWO2_12_FULL_40_19	unclassified Planctomycetes	unclassified Planctomycetes	unclassified Planctomycetes	unclassified Planctomycetes	Planctomycetes	Bacteria	MHZA01000088.1	OHC02762.1	F	F-1	A3H23_05400	<A3H23_05395(COG3169)	<A3H23_05400(COG1151)
GCA_001828715.1_ASM182871v1_genomic.gff	MAG	1817753	Pseudomonadales bacterium GWC1_66_9	Pseudomonadales bacterium GWC1_66_9	unclassified Pseudomonadales	unclassified Pseudomonadales	Pseudomonadales	Gammaproteobacteria	Proteobacteria	Bacteria	MHZH01000040.1	OHC13143.1	F	F-1	A2002_01465	<A2002_01455	<A2002_01460(COG1251)	<A2002_01465(COG1151)	<A2002_01470(COG1142)
GCA_001829495.1_ASM182949v1_genomic.gff	MAG	1802195	Spirochaetes bacterium RBG_16_49_21	Spirochaetes bacterium RBG_16_49_21	unclassified Spirochaetes	unclassified Spirochaetes	unclassified Spirochaetes	unclassified Spirochaetes	Spirochaetes	Bacteria	MIBJ01000065.1	OHD68111.1	E	E-1	A2W19_01820	<A2W19_01775	<A2W19_01780(COG0685)	<A2W19_01785	<A2W19_01790	<A2W19_01795	<A2W19_01800	<A2W19_01805(COG1410)	<A2W19_01810(COG1456)	<A2W19_01815(COG1614)	<A2W19_01820(COG1151)	<A2W19_01825(COG2069)	<A2W19_01830	<A2W19_01835(COG0190)	<A2W19_01840(COG2759)	<A2W19_01845(COG0642)	<A2W19_01850(COG0745)	<A2W19_01855(COG0685)	<A2W19_01860	<A2W19_01865(COG1908)	<A2W19_01870(COG0493)	<A2W19_01875(COG2048)	<A2W19_01880(COG1150)	<A2W19_01885(COG0685)	<A2W19_01890(COG0642)
GCA_001829855.1_ASM182985v1_genomic.gff	MAG	1802289	Syntrophobacterales bacterium RBG_19FT_COMBO_59_10	Syntrophobacterales bacterium RBG_19FT_COMBO_59_10	unclassified Syntrophobacterales	unclassified Syntrophobacterales	Syntrophobacterales	Deltaproteobacteria	Proteobacteria	Bacteria	MICL01000162.1	OHE21721.1	E	E-1	A2Z43_06635	>A2Z43_06615(COG3640)	>A2Z43_06620(COG3894)	>A2Z43_06625(COG3640)	>A2Z43_06630(COG2069)	>A2Z43_06635(COG1151)	>A2Z43_06640	>A2Z43_06645(COG1456)	>A2Z43_06650(COG1410)	>A2Z43_06655	>A2Z43_06660(COG1884)	>A2Z43_06665(COG2185)
GCA_001829875.1_ASM182987v1_genomic.gff	MAG	1802291	Syntrophus sp. GWC2_56_31	Syntrophus sp. GWC2_56_31	Syntrophus	Syntrophaceae	Syntrophobacterales	Deltaproteobacteria	Proteobacteria	Bacteria	MICN01000094.1	OHE22863.1	E	E-1	A2X92_02390	<A2X92_02345(COG3383)	<A2X92_02350(COG3383)	<A2X92_02355(COG1894)	<A2X92_02360(COG3411)	<A2X92_02365(COG1905)	<A2X92_02370	<A2X92_02375(COG1410)	<A2X92_02380(COG1456)	<A2X92_02385(COG1614)	<A2X92_02390(COG1151)	<A2X92_02395(COG2069)	<A2X92_02400(COG3640)	<A2X92_02405
GCA_001830115.1_ASM183011v1_genomic.gff	MAG	1802371	Thaumarchaeota archaeon RBG_16_49_8	Thaumarchaeota archaeon RBG_16_49_8	unclassified Thaumarchaeota	unclassified Thaumarchaeota	unclassified Thaumarchaeota	unclassified Thaumarchaeota	Thaumarchaeota	Archaea	MIDG01000019.1	OHE55937.1	A	A-2	A3K61_03960	>A3K61_03960(COG1152)	>A3K61_03965(COG1880)	>A3K61_03970(COG1614)	>A3K61_03975(COG2069)	>A3K61_03980(COG1456)	>A3K61_03985(COG0437)	>A3K61_03990
GCA_001830835.1_ASM183083v1_genomic.gff	MAG	1802287	Syntrophobacterales bacterium GWC2_56_13	Syntrophobacterales bacterium GWC2_56_13	unclassified Syntrophobacterales	unclassified Syntrophobacterales	Syntrophobacterales	Deltaproteobacteria	Proteobacteria	Bacteria	MICJ01000099.1	OHE16683.1	E	E-1	A2X96_10485	>A2X96_10480(COG3640)	>A2X96_10485(COG1151)	>A2X96_10490(COG0437)	>A2X96_10495(COG1894)	>A2X96_10500(COG1034)	>A2X96_10505(COG1614)	>A2X96_10510(COG1456)	>A2X96_10515(COG3894)	>A2X96_10520(COG3640)	>A2X96_10525(COG2069)	>A2X96_10530(COG1410)
GCA_001830985.1_ASM183098v1_genomic.gff	MAG	1802373	Thermodesulfovibrio sp. RBG_19FT_COMBO_42_12	Thermodesulfovibrio sp. RBG_19FT_COMBO_42_12	Thermodesulfovibrio	Nitrospiraceae	Nitrospirales	Nitrospira	Nitrospirae	Bacteria	MIDI01000260.1	OHE54753.1	E	E-1	A2Z47_07135	>A2Z47_07110(COG0545)	>A2Z47_07115(COG1410)	>A2Z47_07120(COG2069)	>A2Z47_07125	>A2Z47_07130	>A2Z47_07135(COG1151)	>A2Z47_07140(COG1905)	>A2Z47_07145
GCA_001871035.1_ASM187103v1_genomic.gff	MAG	1805124	Deltaproteobacteria bacterium CG1_02_45_11	Deltaproteobacteria bacterium CG1_02_45_11	unclassified Deltaproteobacteria	unclassified Deltaproteobacteria	unclassified Deltaproteobacteria	Deltaproteobacteria	Proteobacteria	Bacteria	MNUN01000039.1	OIN96682.1	E	E-1	AUJ48_01130	>AUJ48_01125(COG2069)	>AUJ48_01130(COG1151)	>AUJ48_01135(COG1614)	>AUJ48_01140(COG1456)	>AUJ48_01145(COG1410)	>AUJ48_01150	>AUJ48_01155
GCA_001871075.1_ASM187107v1_genomic.gff	MAG	1817894	Candidatus Desantisbacteria bacterium CG1_02_49_89	Candidatus Desantisbacteria bacterium CG1_02_49_89	unclassified Candidatus Desantisbacteria	unclassified Candidatus Desantisbacteria	unclassified Candidatus Desantisbacteria	unclassified Candidatus Desantisbacteria	Candidatus Desantisbacteria	Bacteria	MNUP01000143.1	OIN97840.1	E	E-1	AUJ67_10055	>AUJ67_10005(COG4656)	>AUJ67_10010	>AUJ67_10015(COG0685)	>AUJ67_10020(COG3640)	>AUJ67_10025(COG0437)	>AUJ67_10030(COG1905)	>AUJ67_10035(COG1894)	>AUJ67_10040(COG1034)	>AUJ67_10045	>AUJ67_10050(COG2069)	>AUJ67_10055(COG1151)	>AUJ67_10060(COG1614)	>AUJ67_10065(COG1456)	>AUJ67_10070	>AUJ67_10075(COG1410)	>AUJ67_10080	>AUJ67_10085(COG3894)	>AUJ67_10090(COG0432)	>AUJ67_10095(COG0629)	>AUJ67_10100
GCA_001871085.1_ASM187108v1_genomic.gff	MAG	1805130	Desulfovibrionaceae bacterium CG1_02_65_16	Desulfovibrionaceae bacterium CG1_02_65_16	unclassified Desulfovibrionaceae	Desulfovibrionaceae	Desulfovibrionales	Deltaproteobacteria	Proteobacteria	Bacteria	MNUQ01000066.1	OIO03371.1	E	E-2	AUJ49_04475	>AUJ49_04475(COG1151)	>AUJ49_04480(COG3640)	>AUJ49_04485(COG0664)
GCA_001871125.1_ASM187112v1_genomic.gff	MAG	1805131	Elusimicrobia bacterium CG1_02_37_114	Elusimicrobia bacterium CG1_02_37_114	unclassified Elusimicrobia	unclassified Elusimicrobia	unclassified Elusimicrobia	unclassified Elusimicrobia	Elusimicrobia	Bacteria	MNXB01000047.1	OIO75100.1	E	E-1	AUJ85_04120	>AUJ85_04095	>AUJ85_04100(COG0785)	>AUJ85_04105(COG1225)	>AUJ85_04110	>AUJ85_04115(COG1832)	>AUJ85_04120(COG1151)	>AUJ85_04125(COG1237)	>AUJ85_04130
GCA_001871125.1_ASM187112v1_genomic.gff	MAG	1805131	Elusimicrobia bacterium CG1_02_37_114	Elusimicrobia bacterium CG1_02_37_114	unclassified Elusimicrobia	unclassified Elusimicrobia	unclassified Elusimicrobia	unclassified Elusimicrobia	Elusimicrobia	Bacteria	MNXB01000100.1	OIO73354.1	E	E-1	AUJ85_08145	>AUJ85_08145(COG1151)	>AUJ85_08150(COG1525)
GCA_001871685.1_ASM187168v1_genomic.gff	MAG	1805276	Nitrospirae bacterium CG1_02_44_142	Nitrospirae bacterium CG1_02_44_142	unclassified Nitrospirae	unclassified Nitrospirae	unclassified Nitrospirae	unclassified Nitrospirae	Nitrospirae	Bacteria	MNVK01000096.1	OIO28734.1	F	F-1	AUJ60_06880	<AUJ60_06875(COG1251)	<AUJ60_06880(COG1151)	<AUJ60_06885(COG0437)	<AUJ60_06890(COG3279)	<AUJ60_06895(COG1236)
GCA_001871685.1_ASM187168v1_genomic.gff	MAG	1805276	Nitrospirae bacterium CG1_02_44_142	Nitrospirae bacterium CG1_02_44_142	unclassified Nitrospirae	unclassified Nitrospirae	unclassified Nitrospirae	unclassified Nitrospirae	Nitrospirae	Bacteria	MNVK01000113.1	OIO28063.1	E	E-1	AUJ60_08080	>AUJ60_08060(COG1410)	>AUJ60_08065(COG2069)	>AUJ60_08070(COG1456)	>AUJ60_08075(COG1614)	>AUJ60_08080(COG1151)	<AUJ60_08085(COG0493)
GCA_001871755.1_ASM187175v1_genomic.gff	MAG	1805005	Anaerolineae bacterium CG2_30_64_16	Anaerolineae bacterium CG2_30_64_16	unclassified Anaerolineae	unclassified Anaerolineae	unclassified Anaerolineae	Anaerolineae	Chloroflexi	Bacteria	MNXL01000136.1	OIO95282.1	E	E-1	AUK03_05720	>AUK03_05720(COG1151)	>AUK03_05725(COG1614)
GCA_001871755.1_ASM187175v1_genomic.gff	MAG	1805005	Anaerolineae bacterium CG2_30_64_16	Anaerolineae bacterium CG2_30_64_16	unclassified Anaerolineae	unclassified Anaerolineae	unclassified Anaerolineae	Anaerolineae	Chloroflexi	Bacteria	MNXL01000407.1	OIO87627.1	E	E-2	AUK03_17695	<AUK03_17685(COG4995)	<AUK03_17690(COG1251)	<AUK03_17695(COG1151)	<AUK03_17700(COG0437)
GCA_001871795.1_ASM187179v1_genomic.gff	MAG	1803498	Actinobacteria bacterium CG2_30_50_142	Actinobacteria bacterium CG2_30_50_142	unclassified Actinobacteria	unclassified Actinobacteria	unclassified Actinobacteria	unclassified Actinobacteria	Actinobacteria	Bacteria	MNXI01000056.1	OIO87557.1	E	E-1	AUK32_03515	<AUK32_03490(COG0685)	<AUK32_03495	<AUK32_03500(COG0493)	<AUK32_03505(COG1456)	<AUK32_03510(COG1614)	<AUK32_03515(COG1151)	<AUK32_03520(COG2069)	<AUK32_03525(COG3640)	<AUK32_03530(COG3894)	<AUK32_03535(COG2759)	<AUK32_03540(COG3279)	<AUK32_03545(COG3275)	<AUK32_03550(COG2199)
GCA_001871895.1_ASM187189v1_genomic.gff	MAG	1805002	Anaerolineae bacterium CG1_02_58_13	Anaerolineae bacterium CG1_02_58_13	unclassified Anaerolineae	unclassified Anaerolineae	unclassified Anaerolineae	Anaerolineae	Chloroflexi	Bacteria	MNUH01000102.1	OIN95748.1	E	E-1	AUJ21_02645	>AUJ21_02640	>AUJ21_02645(COG1151)	>AUJ21_02650
GCA_001871895.1_ASM187189v1_genomic.gff	MAG	1805002	Anaerolineae bacterium CG1_02_58_13	Anaerolineae bacterium CG1_02_58_13	unclassified Anaerolineae	unclassified Anaerolineae	unclassified Anaerolineae	Anaerolineae	Chloroflexi	Bacteria	MNUH01000318.1	OIN90166.1	F	F-1	AUJ21_08630	<AUJ21_08625(COG1142)	<AUJ21_08630(COG1151)	<AUJ21_08635(COG2197)	<AUJ21_08640
GCA_001872605.1_ASM187260v1_genomic.gff	MAG	1805027	Armatimonadetes bacterium CG2_30_59_28	Armatimonadetes bacterium CG2_30_59_28	unclassified Armatimonadetes	unclassified Armatimonadetes	unclassified Armatimonadetes	unclassified Armatimonadetes	Armatimonadetes	Bacteria	MNXM01000093.1	OIO96429.1	E	E-1	AUJ92_06010	>AUJ92_05975(COG0395)	>AUJ92_05980	>AUJ92_05985(COG2069)	>AUJ92_05990(COG0437)	>AUJ92_05995(COG1905)	>AUJ92_06000(COG1894)	>AUJ92_06005(COG1034)	>AUJ92_06010(COG1151)	>AUJ92_06015(COG1614)	>AUJ92_06020(COG1456)	>AUJ92_06025(COG1410)	>AUJ92_06030	>AUJ92_06035	>AUJ92_06040(COG3640)	>AUJ92_06045(COG3894)	>AUJ92_06050(COG3640)	>AUJ92_06055(COG2759)
GCA_001872725.1_ASM187272v1_genomic.gff	MAG	1805333	Proteobacteria bacterium CG1_02_64_396	Proteobacteria bacterium CG1_02_64_396	unclassified Proteobacteria	unclassified Proteobacteria	unclassified Proteobacteria	unclassified Proteobacteria	Proteobacteria	Bacteria	MNWR01000068.1	OIO56565.1	F	F-1	AUJ55_08225	>AUJ55_08220(COG0437)	>AUJ55_08225(COG1151)	>AUJ55_08230(COG1251)	>AUJ55_08235(COG3640)	>AUJ55_08240	>AUJ55_08245
GCA_001873115.1_ASM187311v1_genomic.gff	MAG	1805129	Desulfobacterales bacterium CG2_30_60_27	Desulfobacterales bacterium CG2_30_60_27	unclassified Desulfobacterales	unclassified Desulfobacterales	Desulfobacterales	Deltaproteobacteria	Proteobacteria	Bacteria	MNYK01000002.1	OIP51497.1	E	E-2	AUK28_00255	>AUK28_00190(COG3366)	>AUK28_00195(COG4822)	>AUK28_00200(COG0609)	>AUK28_00205(COG1120)	>AUK28_00210(COG0614)	>AUK28_00215(COG1797)	>AUK28_00220(COG2082)	>AUK28_00225(COG1903)	>AUK28_00230(COG2242)	>AUK28_00235(COG2243)	>AUK28_00240(COG2875)	>AUK28_00245(COG2073)	>AUK28_00250(COG1010)	>AUK28_00255(COG1151)
GCA_001873115.1_ASM187311v1_genomic.gff	MAG	1805129	Desulfobacterales bacterium CG2_30_60_27	Desulfobacterales bacterium CG2_30_60_27	unclassified Desulfobacterales	unclassified Desulfobacterales	Desulfobacterales	Deltaproteobacteria	Proteobacteria	Bacteria	MNYK01000050.1	OIP49301.1	E	E-3	AUK28_03855	<AUK28_03815(COG1908)	<AUK28_03820(COG1908)	<AUK28_03825(COG1148)	<AUK28_03830(COG1148)	<AUK28_03835(COG3383)	<AUK28_03840(COG1456)	<AUK28_03845(COG1614)	<AUK28_03850(COG2069)	<AUK28_03855(COG1151)	<AUK28_03860(COG0190)
GCA_001873265.1_ASM187326v1_genomic.gff	MAG	1805277	Nitrospirae bacterium CG2_30_41_42	Nitrospirae bacterium CG2_30_41_42	unclassified Nitrospirae	unclassified Nitrospirae	unclassified Nitrospirae	unclassified Nitrospirae	Nitrospirae	Bacteria	MNYU01000058.1	OIP59241.1	E	E-1	AUK38_05965	>AUK38_05940	>AUK38_05945(COG1410)	>AUK38_05950(COG2069)	>AUK38_05955(COG1456)	>AUK38_05960(COG1614)	>AUK38_05965(COG1151)	>AUK38_05970(COG1905)	>AUK38_05975(COG1894)	>AUK38_05980(COG1894)	>AUK38_05985(COG1149)	>AUK38_05990(COG1034)
GCA_001873285.1_ASM187328v1_genomic.gff	MAG	1805278	Nitrospirae bacterium CG2_30_53_67	Nitrospirae bacterium CG2_30_53_67	unclassified Nitrospirae	unclassified Nitrospirae	unclassified Nitrospirae	unclassified Nitrospirae	Nitrospirae	Bacteria	MNYV01000120.1	OIP62985.1	E	E-1	AUK29_07430	>AUK29_07385(COG0685)	>AUK29_07390(COG0413)	>AUK29_07395(COG1351)	>AUK29_07400(COG3640)	>AUK29_07405(COG5495)	>AUK29_07410(COG1410)	>AUK29_07415(COG2069)	>AUK29_07420(COG1456)	>AUK29_07425(COG1614)	>AUK29_07430(COG1151)	>AUK29_07435(COG1905)	>AUK29_07440(COG1894)	>AUK29_07445(COG1034)	>AUK29_07450(COG3383)	>AUK29_07455(COG0664)	>AUK29_07460(COG2759)	>AUK29_07465	>AUK29_07470(COG3894)
GCA_001873675.1_ASM187367v1_genomic.gff	MAG	1805377	Syntrophaceae bacterium CG2_30_49_12	Syntrophaceae bacterium CG2_30_49_12	unclassified Syntrophaceae	Syntrophaceae	Syntrophobacterales	Deltaproteobacteria	Proteobacteria	Bacteria	MNZP01000036.1	OIP92259.1	A	A-4	AUK24_01785	>AUK24_01755(COG1239)	>AUK24_01760(COG3640)	>AUK24_01765(COG1614)	>AUK24_01770(COG1614)	>AUK24_01775(COG1239)	>AUK24_01780	>AUK24_01785(COG1152)	>AUK24_01790(COG1880)	>AUK24_01795(COG2852)	>AUK24_01800	>AUK24_01805(COG1029)	>AUK24_01810(COG1153)	>AUK24_01815(COG1456)	>AUK24_01820	>AUK24_01825	>AUK24_01830(COG0589)	>AUK24_01835(COG4447)	>AUK24_01840(COG1033)	>AUK24_01845
GCA_001873675.1_ASM187367v1_genomic.gff	MAG	1805377	Syntrophaceae bacterium CG2_30_49_12	Syntrophaceae bacterium CG2_30_49_12	unclassified Syntrophaceae	Syntrophaceae	Syntrophobacterales	Deltaproteobacteria	Proteobacteria	Bacteria	MNZP01000175.1	OIP88257.1	E	E-1	AUK24_08330	>AUK24_08325	>AUK24_08330(COG1151)	>AUK24_08335(COG1614)	>AUK24_08340(COG1456)	>AUK24_08345(COG1410)	>AUK24_08350(COG1150)	>AUK24_08355(COG2048)	>AUK24_08360(COG0493)	>AUK24_08365(COG1908)	>AUK24_08370	>AUK24_08375(COG0685)	>AUK24_08380(COG2114)
GCA_001873705.1_ASM187370v1_genomic.gff	MAG	1805379	Syntrophobacteraceae bacterium CG2_30_61_12	Syntrophobacteraceae bacterium CG2_30_61_12	unclassified Syntrophobacteraceae	Syntrophobacteraceae	Syntrophobacterales	Deltaproteobacteria	Proteobacteria	Bacteria	MNZR01000109.1	OIP97197.1	D	D-1	AUK55_04820	>AUK55_04810(COG3448)	>AUK55_04815(COG3448)	>AUK55_04820(COG1151)
GCA_001873705.1_ASM187370v1_genomic.gff	MAG	1805379	Syntrophobacteraceae bacterium CG2_30_61_12	Syntrophobacteraceae bacterium CG2_30_61_12	unclassified Syntrophobacteraceae	Syntrophobacteraceae	Syntrophobacterales	Deltaproteobacteria	Proteobacteria	Bacteria	MNZR01000116.1	OIP97104.1	E	E-2	AUK55_04945	>AUK55_04935	>AUK55_04940(COG1142)	>AUK55_04945(COG1151)	>AUK55_04950(COG1142)
GCA_001873745.1_ASM187374v1_genomic.gff	MAG	1805378	Syntrophaceae bacterium CG2_30_58_14	Syntrophaceae bacterium CG2_30_58_14	unclassified Syntrophaceae	Syntrophaceae	Syntrophobacterales	Deltaproteobacteria	Proteobacteria	Bacteria	MNZQ01000075.1	OIP91811.1	E	E-1	AUK26_06175	>AUK26_06150(COG2759)	>AUK26_06155(COG3894)	>AUK26_06160(COG3640)	>AUK26_06165(COG0190)	>AUK26_06170(COG2069)	>AUK26_06175(COG1151)	>AUK26_06180(COG1614)	>AUK26_06185(COG1456)	>AUK26_06190(COG1410)
GCA_001873845.1_ASM187384v1_genomic.gff	MAG	1803514	Candidatus Altiarchaeum sp. CG2_30_32_3053	Candidatus Altiarchaeum sp. CG2_30_32_3053	Candidatus Altiarchaeum	unclassified Candidatus Altiarchaeales	Candidatus Altiarchaeales	unclassified Euryarchaeota	Euryarchaeota	Archaea	MNZY01000181.1	OIQ05133.1	A	A-2	AUK59_05050	>AUK59_05005(COG1603)	>AUK59_05010(COG3894)	>AUK59_05015	>AUK59_05020(COG5010)	>AUK59_05025(COG2069)	>AUK59_05030(COG1456)	>AUK59_05035	>AUK59_05040(COG1152)	>AUK59_05045	>AUK59_05050(COG1152)
GCA_001873905.1_ASM187390v1_genomic.gff	MAG	1805125	Deltaproteobacteria bacterium CG2_30_43_15	Deltaproteobacteria bacterium CG2_30_43_15	unclassified Deltaproteobacteria	unclassified Deltaproteobacteria	unclassified Deltaproteobacteria	Deltaproteobacteria	Proteobacteria	Bacteria	MNYF01000078.1	OIP32637.1	E	E-1	AUK23_03960	<AUK23_03910(COG0513)	<AUK23_03915(COG0685)	<AUK23_03920	<AUK23_03925	<AUK23_03930(COG0493)	<AUK23_03935(COG2048)	<AUK23_03940(COG1150)	<AUK23_03945(COG1410)	<AUK23_03950(COG1456)	<AUK23_03955(COG1614)	<AUK23_03960(COG1151)	<AUK23_03965(COG2069)	<AUK23_03970(COG0190)	<AUK23_03975(COG3640)	<AUK23_03980(COG2759)
GCA_001873905.1_ASM187390v1_genomic.gff	MAG	1805125	Deltaproteobacteria bacterium CG2_30_43_15	Deltaproteobacteria bacterium CG2_30_43_15	unclassified Deltaproteobacteria	unclassified Deltaproteobacteria	unclassified Deltaproteobacteria	Deltaproteobacteria	Proteobacteria	Bacteria	MNYF01000108.1	OIP31919.1	A	others	AUK23_05635	<AUK23_05630(COG1880)	<AUK23_05635(COG1152)
GCA_001873905.1_ASM187390v1_genomic.gff	MAG	1805125	Deltaproteobacteria bacterium CG2_30_43_15	Deltaproteobacteria bacterium CG2_30_43_15	unclassified Deltaproteobacteria	unclassified Deltaproteobacteria	unclassified Deltaproteobacteria	Deltaproteobacteria	Proteobacteria	Bacteria	MNYF01000171.1	OIP30420.1	A	A-6	AUK23_08775	<AUK23_08765(COG1614)	<AUK23_08770(COG1880)	<AUK23_08775(COG1152)
GCA_001873935.1_ASM187393v1_genomic.gff	MAG	1805127	Deltaproteobacteria bacterium CG2_30_66_27	Deltaproteobacteria bacterium CG2_30_66_27	unclassified Deltaproteobacteria	unclassified Deltaproteobacteria	unclassified Deltaproteobacteria	Deltaproteobacteria	Proteobacteria	Bacteria	MNYH01000012.1	OIP36429.1	F	F-1	AUK27_01785	>AUK27_01780(COG0437)	>AUK27_01785(COG1151)	>AUK27_01790(COG1251)	>AUK27_01795(COG3640)	>AUK27_01800(COG0243)	>AUK27_01805(COG1245)	>AUK27_01810(COG0348)	>AUK27_01815(COG3062)	>AUK27_01820(COG1666)	>AUK27_01825(COG0819)	>AUK27_01830(COG0351)	<AUK27_01835(COG0626)	>AUK27_01840(COG0626)
GCA_001873945.1_ASM187394v1_genomic.gff	MAG	1817895	Candidatus Desantisbacteria bacterium CG2_30_40_21	Candidatus Desantisbacteria bacterium CG2_30_40_21	unclassified Candidatus Desantisbacteria	unclassified Candidatus Desantisbacteria	unclassified Candidatus Desantisbacteria	unclassified Candidatus Desantisbacteria	Candidatus Desantisbacteria	Bacteria	MNYI01000234.1	OIP36678.1	E	E-1	AUJ95_09170	>AUJ95_09160	>AUJ95_09165	>AUJ95_09170(COG1151)	>AUJ95_09175
GCA_001874005.1_ASM187400v1_genomic.gff	MAG	1805128	Desulfobacteraceae bacterium CG2_30_51_40	Desulfobacteraceae bacterium CG2_30_51_40	unclassified Desulfobacteraceae	Desulfobacteraceae	Desulfobacterales	Deltaproteobacteria	Proteobacteria	Bacteria	MNYJ01000149.1	OIP39525.1	E	E-1	AUK25_10210	<AUK25_10200(COG0607)	<AUK25_10205(COG0778)	<AUK25_10210(COG1151)
GCA_001874005.1_ASM187400v1_genomic.gff	MAG	1805128	Desulfobacteraceae bacterium CG2_30_51_40	Desulfobacteraceae bacterium CG2_30_51_40	unclassified Desulfobacteraceae	Desulfobacteraceae	Desulfobacterales	Deltaproteobacteria	Proteobacteria	Bacteria	MNYJ01000154.1	OIP39339.1	E	E-2	AUK25_10575	>AUK25_10565	>AUK25_10570(COG1142)	>AUK25_10575(COG1151)
GCA_001914235.1_ASM191423v1_genomic.gff	MAG	1920419	Desulfobulbaceae bacterium DB1	Desulfobulbaceae bacterium DB1	unclassified Desulfobulbaceae	Desulfobulbaceae	Desulfobacterales	Deltaproteobacteria	Proteobacteria	Bacteria	MQUF01000008.1	OKY75187.1	E	E-3	BM485_09415	>BM485_09410(COG0190)	>BM485_09415(COG1151)	>BM485_09420(COG2069)	>BM485_09425(COG1614)	>BM485_09430(COG1456)	>BM485_09435(COG0493)	>BM485_09440(COG3383)	>BM485_09445(COG1148)	>BM485_09450(COG1148)	>BM485_09455(COG1908)	>BM485_09460(COG1908)
GCA_001914235.1_ASM191423v1_genomic.gff	MAG	1920419	Desulfobulbaceae bacterium DB1	Desulfobulbaceae bacterium DB1	unclassified Desulfobulbaceae	Desulfobulbaceae	Desulfobacterales	Deltaproteobacteria	Proteobacteria	Bacteria	MQUF01000016.1	OKY74363.1	F	F-1	BM485_13955	<BM485_13945(COG1251)	<BM485_13950(COG1142)	<BM485_13955(COG1151)	<BM485_13960	<BM485_13965	>BM485_13970(COG0642)
GCA_001914405.1_ASM191440v1_genomic.gff	MAG	1903181	Candidatus Methanohalarchaeum thermophilum	Candidatus Methanohalarchaeum thermophilum	Candidatus Methanohalarchaeum	unclassified Methanonatronarchaeia	unclassified Methanonatronarchaeia	Methanonatronarchaeia	Euryarchaeota	Archaea	MSDW01000001.1	OKY77649.1	D	D-1	BTN85_0117	<BTN85_0117(COG1151)	>BTN85_0118(COG1719)
GCA_001916655.1_ASM191665v1_genomic.gff	MAG	1897027	Firmicutes bacterium CAG:110_56_8	Firmicutes bacterium CAG:110_56_8	unclassified Firmicutes	unclassified Firmicutes	unclassified Firmicutes	unclassified Firmicutes	Firmicutes	Bacteria	MNSU01000157.1	OLA38152.1	E	E-1	BHW31_05215	<BHW31_05200	<BHW31_05205	<BHW31_05210(COG3640)	<BHW31_05215(COG1151)
GCA_001940655.1_ASM194065v1_genomic.gff	MAG	1849166	Candidatus Lokiarchaeota archaeon CR_4	Candidatus Lokiarchaeota archaeon CR_4	unclassified Lokiarchaeota	unclassified Lokiarchaeota	unclassified Lokiarchaeota	unclassified Lokiarchaeota	Candidatus Lokiarchaeota	Archaea	MBAA01000063.1	OLS15365.1	A	A-2	RBG13Loki_0996	<RBG13Loki_0996(COG1152)
GCA_002009475.1_ASM200947v1_genomic.gff	MAG	1004156	Candidatus Brocadia caroliniensis	Candidatus Brocadia caroliniensis	Candidatus Brocadia	Candidatus Brocadiaceae	Candidatus Brocadiales	Planctomycetia	Planctomycetes	Bacteria	AYTS01000093.1	OOP56179.1	E	E-1	AYP45_10590	<AYP45_10585(COG1614)	<AYP45_10590(COG1151)	<AYP45_10595(COG3640)
GCA_002030005.1_ASM203000v1_genomic.gff	MAG	1775675	Firmicutes bacterium ML8_F2	Firmicutes bacterium ML8_F2	unclassified Firmicutes	unclassified Firmicutes	unclassified Firmicutes	unclassified Firmicutes	Firmicutes	Bacteria	LQBG01000059.1	OPL11740.1	F	F-1	AVO34_08260	>AVO34_08225(COG0492)	>AVO34_08230(COG1285)	>AVO34_08235(COG4463)	>AVO34_08240(COG3880)	>AVO34_08245(COG3869)	>AVO34_08250(COG0542)	>AVO34_08255(COG3640)	>AVO34_08260(COG1151)	>AVO34_08265(COG1614)	>AVO34_08270(COG1456)	>AVO34_08275(COG2069)	>AVO34_08280(COG1410)	>AVO34_08285	>AVO34_08290(COG0685)
GCA_002049905.1_ASM204990v1_genomic.gff	MAG	1956167	Desulfobacteraceae bacterium 4484_190.1	Desulfobacteraceae bacterium 4484_190.1	unclassified Desulfobacteraceae	Desulfobacteraceae	Desulfobacterales	Deltaproteobacteria	Proteobacteria	Bacteria	MVDA01000085.1	OPX38571.1	E	E-1	B1H11_04410	>B1H11_04410(COG1151)	>B1H11_04415(COG1614)	>B1H11_04420(COG1456)	>B1H11_04425	>B1H11_04430(COG1410)
GCA_002050005.1_ASM205000v1_genomic.gff	MAG	1956169	Desulfobacteraceae bacterium 4484_190.3	Desulfobacteraceae bacterium 4484_190.3	unclassified Desulfobacteraceae	Desulfobacteraceae	Desulfobacterales	Deltaproteobacteria	Proteobacteria	Bacteria	MVDC01000157.1	OPX40076.1	E	E-1	B1H13_08380	<B1H13_08375	<B1H13_08380(COG1151)	<B1H13_08385(COG2069)	<B1H13_08390(COG3640)
GCA_002050025.1_ASM205002v1_genomic.gff	MAG	1956168	Desulfobacteraceae bacterium 4484_190.2	Desulfobacteraceae bacterium 4484_190.2	unclassified Desulfobacteraceae	Desulfobacteraceae	Desulfobacterales	Deltaproteobacteria	Proteobacteria	Bacteria	MVDB01000067.1	OPX37239.1	E	E-1	B1H12_05380	>B1H12_05330(COG1592)	>B1H12_05335	>B1H12_05340	>B1H12_05345(COG1773)	>B1H12_05350(COG0735)	>B1H12_05355(COG1592)	>B1H12_05360(COG2033)	>B1H12_05365(COG1528)	>B1H12_05370(COG0426)	>B1H12_05375	>B1H12_05380(COG1151)	>B1H12_05385(COG1773)	>B1H12_05390(COG1331)	>B1H12_05395(COG0655)
GCA_002050125.1_ASM205012v1_genomic.gff	MAG	1961101	Anaerolineae bacterium UTCFX2	Anaerolineae bacterium UTCFX2	unclassified Anaerolineae	unclassified Anaerolineae	unclassified Anaerolineae	Anaerolineae	Chloroflexi	Bacteria	MWTA01000044.1	OQY92079.1	E	E-1	B6D39_05225	>B6D39_05215(COG3894)	>B6D39_05220	>B6D39_05225(COG1151)	>B6D39_05230(COG1614)	>B6D39_05235(COG2069)	>B6D39_05240(COG1456)	>B6D39_05245(COG3894)	>B6D39_05250(COG1410)	>B6D39_05255(COG0685)	>B6D39_05260	>B6D39_05265(COG0413)	>B6D39_05270	<B6D39_05275(COG0673)
GCA_002050195.1_ASM205019v1_genomic.gff	MAG	1961102	Anaerolineae bacterium UTCFX3	Anaerolineae bacterium UTCFX3	unclassified Anaerolineae	unclassified Anaerolineae	unclassified Anaerolineae	Anaerolineae	Chloroflexi	Bacteria	MWSZ01000271.1	OQY80416.1	E	E-1	B6D40_12965	<B6D40_12965(COG1151)	<B6D40_12970
GCA_002050325.1_ASM205032v1_genomic.gff	MAG	1961113	Candidatus Brocadia sp. UTAMX1	Candidatus Brocadia sp. UTAMX1	Candidatus Brocadia	Candidatus Brocadiaceae	Candidatus Brocadiales	Planctomycetia	Planctomycetes	Bacteria	MWTF01000008.1	OQZ04293.1	E	E-1	B6D34_03695	<B6D34_03665(COG2069)	<B6D34_03670(COG3640)	<B6D34_03675(COG3894)	<B6D34_03680(COG1456)	<B6D34_03685(COG0740)	<B6D34_03690(COG1614)	<B6D34_03695(COG1151)	<B6D34_03700(COG3640)
GCA_002082765.1_ASM208276v1_genomic.gff	-	39777	Veillonella atypica	Veillonella atypica	Veillonella	Veillonellaceae	Veillonellales	Negativicutes	Firmicutes	Bacteria	CP020566.1	ARF98590.1	B	B-1	B7L28_00930	>B7L28_00930(COG1151)
GCA_002083955.1_ASM208395v1_genomic.gff	MAG	1934248	Desulfobacteraceae bacterium IS3	Desulfobacteraceae bacterium IS3	unclassified Desulfobacteraceae	Desulfobacteraceae	Desulfobacterales	Deltaproteobacteria	Proteobacteria	Bacteria	MTEM01000066.1	OQX27099.1	E	E-1	BWK80_07045	>BWK80_07030	>BWK80_07035	>BWK80_07040(COG0809)	>BWK80_07045(COG1151)
GCA_002083955.1_ASM208395v1_genomic.gff	MAG	1934248	Desulfobacteraceae bacterium IS3	Desulfobacteraceae bacterium IS3	unclassified Desulfobacteraceae	Desulfobacteraceae	Desulfobacterales	Deltaproteobacteria	Proteobacteria	Bacteria	MTEM01000262.1	OQX24525.1	E	E-1	BWK80_20380	<BWK80_20365(COG1410)	<BWK80_20370(COG1456)	<BWK80_20375(COG1614)	<BWK80_20380(COG1151)	<BWK80_20385(COG2069)
GCA_002083955.1_ASM208395v1_genomic.gff	MAG	1934248	Desulfobacteraceae bacterium IS3	Desulfobacteraceae bacterium IS3	unclassified Desulfobacteraceae	Desulfobacteraceae	Desulfobacterales	Deltaproteobacteria	Proteobacteria	Bacteria	MTEM01000320.1	OQX23836.1	E	E-1	BWK80_23925	<BWK80_23915(COG1456)	<BWK80_23920(COG1614)	<BWK80_23925(COG1151)	<BWK80_23930(COG2069)	<BWK80_23935(COG3894)	<BWK80_23940
GCA_002083955.1_ASM208395v1_genomic.gff	MAG	1934248	Desulfobacteraceae bacterium IS3	Desulfobacteraceae bacterium IS3	unclassified Desulfobacteraceae	Desulfobacteraceae	Desulfobacterales	Deltaproteobacteria	Proteobacteria	Bacteria	MTEM01000650.1	OQX17565.1	E	E-2	BWK80_39470	>BWK80_39445(COG0306)	>BWK80_39450(COG1392)	>BWK80_39455(COG0414)	>BWK80_39460(COG1251)	>BWK80_39465(COG1142)	>BWK80_39470(COG1151)
GCA_002083955.1_ASM208395v1_genomic.gff	MAG	1934248	Desulfobacteraceae bacterium IS3	Desulfobacteraceae bacterium IS3	unclassified Desulfobacteraceae	Desulfobacteraceae	Desulfobacterales	Deltaproteobacteria	Proteobacteria	Bacteria	MTEM01001121.1	OQX03938.1	E	E-1	BWK80_54615	<BWK80_54615(COG1151)
GCA_002083965.1_ASM208396v1_genomic.gff	MAG	1934249	Desulfobacteraceae bacterium A6	Desulfobacteraceae bacterium A6	unclassified Desulfobacteraceae	Desulfobacteraceae	Desulfobacterales	Deltaproteobacteria	Proteobacteria	Bacteria	MTEQ01000130.1	OQW97524.1	E	E-1	BWK74_06185	<BWK74_06180(COG1614)	<BWK74_06185(COG1151)	<BWK74_06190(COG2069)
GCA_002083975.1_ASM208397v1_genomic.gff	MAG	1934250	Desulfobulbaceae bacterium A2	Desulfobulbaceae bacterium A2	unclassified Desulfobulbaceae	Desulfobulbaceae	Desulfobacterales	Deltaproteobacteria	Proteobacteria	Bacteria	MTEO01000126.1	OQX14314.1	F	F-1	BWK76_14885	<BWK76_14865(COG1034)	<BWK76_14870(COG1894)	<BWK76_14875(COG1905)	<BWK76_14880(COG1142)	<BWK76_14885(COG1151)	>BWK76_14890(COG1309)
GCA_002083975.1_ASM208397v1_genomic.gff	MAG	1934250	Desulfobulbaceae bacterium A2	Desulfobulbaceae bacterium A2	unclassified Desulfobulbaceae	Desulfobulbaceae	Desulfobacterales	Deltaproteobacteria	Proteobacteria	Bacteria	MTEO01000256.1	OQX09736.1	E	E-3	BWK76_21770	<BWK76_21765(COG2069)	<BWK76_21770(COG1151)	<BWK76_21775(COG0190)	<BWK76_21780(COG0507)
GCA_002083975.1_ASM208397v1_genomic.gff	MAG	1934250	Desulfobulbaceae bacterium A2	Desulfobulbaceae bacterium A2	unclassified Desulfobulbaceae	Desulfobulbaceae	Desulfobacterales	Deltaproteobacteria	Proteobacteria	Bacteria	MTEO01000273.1	OQX09243.1	E	E-2	BWK76_22550	>BWK76_22550(COG1151)	>BWK76_22555(COG0664)	>BWK76_22560(COG2406)
GCA_002083975.1_ASM208397v1_genomic.gff	MAG	1934250	Desulfobulbaceae bacterium A2	Desulfobulbaceae bacterium A2	unclassified Desulfobulbaceae	Desulfobulbaceae	Desulfobacterales	Deltaproteobacteria	Proteobacteria	Bacteria	MTEO01000340.1	OQX07461.1	E	E-3	BWK76_24850	>BWK76_24840(COG0507)	>BWK76_24845(COG0190)	>BWK76_24850(COG1151)
GCA_002083985.1_ASM208398v1_genomic.gff	MAG	1933927	Candidatus Altiarchaeales archaeon A3	Candidatus Altiarchaeales archaeon A3	unclassified Candidatus Altiarchaeales	unclassified Candidatus Altiarchaeales	Candidatus Altiarchaeales	unclassified Euryarchaeota	Euryarchaeota	Archaea	MTER01000011.1	OQX22531.1	A	A-5	BWK75_00480	<BWK75_00480(COG1152)	<BWK75_00485	<BWK75_00490(COG4694)	<BWK75_00495	<BWK75_00500(COG1669)	<BWK75_00505
GCA_002084425.1_ASM208442v1_genomic.gff	MAG	1971625	Desulfobacteraceae bacterium 4572_130	Desulfobacteraceae bacterium 4572_130	unclassified Desulfobacteraceae	Desulfobacteraceae	Desulfobacterales	Deltaproteobacteria	Proteobacteria	Bacteria	NBLN01000005.1	OQY01862.1	E	E-1	B6I26_02545	>B6I26_02540(COG2069)	>B6I26_02545(COG1151)	>B6I26_02550(COG1614)	>B6I26_02555(COG1456)	>B6I26_02560(COG1410)	>B6I26_02565	>B6I26_02570(COG3640)	>B6I26_02575	>B6I26_02580	>B6I26_02585(COG1459)	>B6I26_02590
GCA_002084625.1_ASM208462v1_genomic.gff	MAG	1971624	Anaerolineaceae bacterium 4572_32.2	Anaerolineaceae bacterium 4572_32.2	unclassified Anaerolineaceae	Anaerolineaceae	Anaerolineales	Anaerolineae	Chloroflexi	Bacteria	NBLW01000200.1	OQY18388.1	E	E-1	B6I35_13125	<B6I35_13115(COG1251)	<B6I35_13120(COG1142)	<B6I35_13125(COG1151)
GCA_002084685.1_ASM208468v1_genomic.gff	MAG	1971621	Desulfobacterium sp. 4572_20	Desulfobacterium sp. 4572_20	Desulfobacterium	Desulfobacteraceae	Desulfobacterales	Deltaproteobacteria	Proteobacteria	Bacteria	NBLT01000108.1	OQY15530.1	E	E-1	B6I32_06935	<B6I32_06930(COG1614)	<B6I32_06935(COG1151)	<B6I32_06940(COG2069)
GCA_002084945.1_ASM208494v1_genomic.gff	MAG	1972443	Desulfobacteraceae bacterium 4572_87	Desulfobacteraceae bacterium 4572_87	unclassified Desulfobacteraceae	Desulfobacteraceae	Desulfobacterales	Deltaproteobacteria	Proteobacteria	Bacteria	NBMJ01000017.1	OQY50548.1	E	E-2	B6240_01430	<B6240_01415(COG0642)	>B6240_01420(COG1251)	>B6240_01425(COG0437)	>B6240_01430(COG1151)	>B6240_01435(COG0239)	>B6240_01440(COG0517)
GCA_002084945.1_ASM208494v1_genomic.gff	MAG	1972443	Desulfobacteraceae bacterium 4572_87	Desulfobacteraceae bacterium 4572_87	unclassified Desulfobacteraceae	Desulfobacteraceae	Desulfobacterales	Deltaproteobacteria	Proteobacteria	Bacteria	NBMJ01000171.1	OQY45366.1	E	E-1	B6240_08895	<B6240_08890	<B6240_08895(COG1151)
GCA_002084995.1_ASM208499v1_genomic.gff	MAG	1968529	Candidatus Aminicenantes bacterium 4484_214	Candidatus Aminicenantes bacterium 4484_214	unclassified Aminicenantes	unclassified Aminicenantes	unclassified Aminicenantes	unclassified Aminicenantes	Candidatus Aminicenantes	Bacteria	MZGL01000008.1	OQX55308.1	E	E-1	B5M54_02980	<B5M54_02925(COG5598)	<B5M54_02930	<B5M54_02935(COG5012)	<B5M54_02940	<B5M54_02945(COG0457)	<B5M54_02950(COG0646)	<B5M54_02955(COG3894)	<B5M54_02960(COG1456)	<B5M54_02965(COG2069)	<B5M54_02970(COG3640)	<B5M54_02975(COG1614)	<B5M54_02980(COG1151)	<B5M54_02985	<B5M54_02990(COG3640)
GCA_002085095.1_ASM208509v1_genomic.gff	MAG	1968523	Desulfococcus sp. 4484_242	Desulfococcus sp. 4484_242	Desulfococcus	Desulfobacteraceae	Desulfobacterales	Deltaproteobacteria	Proteobacteria	Bacteria	MZGR01000013.1	OQX66143.1	E	E-1	B5M55_01000	>B5M55_00995(COG1142)	>B5M55_01000(COG1151)	>B5M55_01005(COG1905)	>B5M55_01010(COG1894)	>B5M55_01015(COG1034)
GCA_002085115.1_ASM208511v1_genomic.gff	MAG	1968522	Desulfococcus sp. 4484_241	Desulfococcus sp. 4484_241	Desulfococcus	Desulfobacteraceae	Desulfobacterales	Deltaproteobacteria	Proteobacteria	Bacteria	MZGQ01000111.1	OQX60665.1	E	E-1	B5M56_10655	>B5M56_10650(COG2069)	>B5M56_10655(COG1151)	>B5M56_10660(COG1152)
GCA_002085455.1_ASM208545v1_genomic.gff	MAG	1972444	Desulfobacteraceae bacterium 4572_88	Desulfobacteraceae bacterium 4572_88	unclassified Desulfobacteraceae	Desulfobacteraceae	Desulfobacterales	Deltaproteobacteria	Proteobacteria	Bacteria	NBMK01000078.1	OQY59196.1	E	E-2	B6245_07920	>B6245_07910(COG1251)	>B6245_07915(COG0437)	>B6245_07920(COG1151)
GCA_002085455.1_ASM208545v1_genomic.gff	MAG	1972444	Desulfobacteraceae bacterium 4572_88	Desulfobacteraceae bacterium 4572_88	unclassified Desulfobacteraceae	Desulfobacteraceae	Desulfobacterales	Deltaproteobacteria	Proteobacteria	Bacteria	NBMK01000126.1	OQY58497.1	E	E-1	B6245_11530	<B6245_11525	<B6245_11530(COG1151)	<B6245_11535(COG2069)	<B6245_11540(COG3894)
GCA_002176955.1_ASM217695v1_genomic.gff	MAG	1932697	bacterium M21	bacterium M21	unclassified Bacteria	unclassified Bacteria	unclassified Bacteria	unclassified Bacteria	unclassified Bacteria	Bacteria	MSYK01000089.1	OVE82164.1	E	E-1	BVY04_01905	>BVY04_01880(COG0646)	>BVY04_01885	>BVY04_01890(COG3640)	>BVY04_01895	>BVY04_01900(COG3640)	>BVY04_01905(COG1151)	>BVY04_01910(COG1614)	>BVY04_01915	>BVY04_01920(COG1456)	>BVY04_01925(COG3894)	>BVY04_01930	>BVY04_01935(COG0523)	>BVY04_01940	>BVY04_01945(COG1580)
GCA_002176975.1_ASM217697v1_genomic.gff	MAG	1932703	bacterium I07	bacterium I07	unclassified Bacteria	unclassified Bacteria	unclassified Bacteria	unclassified Bacteria	unclassified Bacteria	Bacteria	MSYH01000099.1	OVE79778.1	E	E-1	BVY01_01545	>BVY01_01525(COG3640)	>BVY01_01530	>BVY01_01535(COG0437)	>BVY01_01540(COG1251)	>BVY01_01545(COG1151)	>BVY01_01550(COG1614)	>BVY01_01555(COG3640)	>BVY01_01560(COG2069)	>BVY01_01565(COG1456)	>BVY01_01570(COG3894)	>BVY01_01575
GCA_002237635.1_ACETO_MES1_genomic.gff	MAG	1899015	Acetobacterium sp. MES1	Acetobacterium sp. MES1	Acetobacterium	Eubacteriaceae	Clostridiales	Clostridia	Firmicutes	Bacteria	MJUY01000022.1	OXS26107.1	E	E-1	BI182_00140	<BI182_00105(COG1876)	<BI182_00110	<BI182_00115	<BI182_00120	<BI182_00125	<BI182_00130(COG1614)	<BI182_00135(COG3640)	<BI182_00140(COG1151)	<BI182_00145(COG1410)	<BI182_00150(COG1456)	<BI182_00155(COG2069)	<BI182_00160	<BI182_00165	<BI182_00170(COG3894)	<BI182_00175(COG3640)	<BI182_00180(COG1149)	>BI182_00185(COG0664)
GCA_002237635.1_ACETO_MES1_genomic.gff	MAG	1899015	Acetobacterium sp. MES1	Acetobacterium sp. MES1	Acetobacterium	Eubacteriaceae	Clostridiales	Clostridia	Firmicutes	Bacteria	MJUY01000036.1	OXS25419.1	C	C-1	BI182_09540	<BI182_09525(COG0652)	<BI182_09530(COG1251)	<BI182_09535(COG1142)	<BI182_09540(COG1151)	<BI182_09545(COG0735)	<BI182_09550	<BI182_09555(COG0446)	<BI182_09560(COG0640)	<BI182_09565(COG1846)
GCA_002237645.1_DESULFO_MES5_genomic.gff	MAG	1899016	Desulfovibrio sp. MES5	Desulfovibrio sp. MES5	Desulfovibrio	Desulfovibrionaceae	Desulfovibrionales	Deltaproteobacteria	Proteobacteria	Bacteria	MJUZ01000014.1	OXS29353.1	E	E-2	BCS36_00030	<BCS36_00025(COG3640)	<BCS36_00030(COG1151)
GCA_002242135.1_ASM224213v1_genomic.gff	MAG	1629550	Paraclostridium benzoelyticum	Paraclostridium benzoelyticum	Paraclostridium	Peptostreptococcaceae	Clostridiales	Clostridia	Firmicutes	Bacteria	LQAO01000103.1	OXX84709.1	C	C-1	AVM15_02775	>AVM15_02775(COG1151)	>AVM15_02780(COG0437)	>AVM15_02785(COG1251)	>AVM15_02790
GCA_002254825.2_ASM225482v2_genomic.gff	MAG	1978124	Methanosarcinales archaeon ex4572_44	Methanosarcinales archaeon ex4572_44	unclassified Methanosarcinales	unclassified Methanosarcinales	Methanosarcinales	Methanomicrobia	Euryarchaeota	Archaea	NJEL02000034.1	PHP45600.1	F	others	B6V01_003250	>B6V01_003240(COG0316)	>B6V01_003245(COG1308)	>B6V01_003250(COG1151)	>B6V01_003255(COG0517)	>B6V01_003260(COG3448)	>B6V01_003265(COG0489)	>B6V01_003270(COG1433)
GCA_002254905.1_ASM225490v1_genomic.gff	MAG	2012528	Thermofilum sp. ex4484_82	Thermofilum sp. ex4484_82	Thermofilum	Thermofilaceae	Thermoproteales	Thermoprotei	Crenarchaeota	Archaea	NJDJ01000007.1	OYT30143.1	A	A-1	B6U95_01315	>B6U95_01315(COG1152)	>B6U95_01320(COG1880)	>B6U95_01325(COG1614)	>B6U95_01330(COG2069)	>B6U95_01335(COG1456)
GCA_002255025.1_ASM225502v1_genomic.gff	MAG	2012509	Candidatus Bathyarchaeota archaeon ex4484_135	Candidatus Bathyarchaeota archaeon ex4484_135	unclassified Candidatus Bathyarchaeota	unclassified Candidatus Bathyarchaeota	unclassified Candidatus Bathyarchaeota	unclassified Candidatus Bathyarchaeota	Candidatus Bathyarchaeota	Archaea	NJEJ01000005.1	OYT52935.1	A	A-1	B6U66_00520	<B6U66_00515	<B6U66_00520(COG1152)
GCA_002255135.1_ASM225513v1_genomic.gff	MAG	1978123	Methanosarcinales archaeon ex4484_138	Methanosarcinales archaeon ex4484_138	unclassified Methanosarcinales	unclassified Methanosarcinales	Methanosarcinales	Methanomicrobia	Euryarchaeota	Archaea	NJEQ01000032.1	OYT63315.1	A	A-1	B6U67_03035	<B6U67_02995(COG1456)	<B6U67_03000(COG2069)	<B6U67_03005	<B6U67_03010(COG3640)	<B6U67_03015(COG1614)	<B6U67_03020(COG1035)	<B6U67_03025	<B6U67_03030(COG1880)	<B6U67_03035(COG1152)
GCA_002256575.1_ASM225657v1_genomic.gff	MAG	1917473	Methanosaeta sp. NSM2	Methanosaeta sp. NSM2	Methanothrix	Methanosaetaceae	Methanosarcinales	Methanomicrobia	Euryarchaeota	Archaea	NOLD01000051.1	OYV14846.1	A	A-2	CG440_278	>CG440_278(COG1152)	>CG440_279(COG1880)	>CG440_280(COG1614)	>CG440_281(COG1614)
GCA_002256575.1_ASM225657v1_genomic.gff	MAG	1917473	Methanosaeta sp. NSM2	Methanosaeta sp. NSM2	Methanothrix	Methanosaetaceae	Methanosarcinales	Methanomicrobia	Euryarchaeota	Archaea	NOLD01000053.1	OYV14837.1	E	E-1	CG440_290	<CG440_289(COG0437)	<CG440_290(COG1151)
GCA_002256595.1_ASM225659v1_genomic.gff	MAG	1917472	Methanosaeta sp. NSP1	Methanosaeta sp. NSP1	Methanothrix	Methanosaetaceae	Methanosarcinales	Methanomicrobia	Euryarchaeota	Archaea	NOLC01000232.1	OYV08918.1	E	E-1	CG437_1579	>CG437_1579(COG1151)	>CG437_1580(COG0437)
GCA_002256595.1_ASM225659v1_genomic.gff	MAG	1917472	Methanosaeta sp. NSP1	Methanosaeta sp. NSP1	Methanothrix	Methanosaetaceae	Methanosarcinales	Methanomicrobia	Euryarchaeota	Archaea	NOLC01000007.1	OYV11006.1	A	A-2	CG437_28	>CG437_28(COG1152)	>CG437_29(COG1880)	>CG437_30(COG1614)
GCA_002256715.1_ASM225671v1_genomic.gff	MAG	1917474	Methanosaeta sp. ASO1	Methanosaeta sp. ASO1	Methanothrix	Methanosaetaceae	Methanosarcinales	Methanomicrobia	Euryarchaeota	Archaea	NOLE01000046.1	OYV13255.1	E	E-1	CG446_202	<CG446_201(COG0437)	<CG446_202(COG1151)
GCA_002356395.1_ASM235639v1_genomic.gff	MAG	2017966	Methanothermobacter sp. EMTCatA1	Methanothermobacter sp. EMTCatA1	Methanothermobacter	Methanobacteriaceae	Methanobacteriales	Methanobacteria	Euryarchaeota	Archaea	AP018336.1	BAZ99065.1	A	others	tca_00999	<tca_00998(COG1880)	>tca_00999(COG1152)	>tca_01000(COG1142)
GCA_002356395.1_ASM235639v1_genomic.gff	MAG	2017966	Methanothermobacter sp. EMTCatA1	Methanothermobacter sp. EMTCatA1	Methanothermobacter	Methanobacteriaceae	Methanobacteriales	Methanobacteria	Euryarchaeota	Archaea	AP018336.1	BAZ99700.1	A	A-1	tca_01655	>tca_01655(COG1152)	>tca_01656(COG1880)	>tca_01657(COG1614)	>tca_01658(COG3640)	>tca_01659(COG2069)	>tca_01660(COG1456)	>tca_01661(COG1142)
GCA_002412205.1_ASM241220v1_genomic.gff	MAG	2012530	Candidatus Geothermarchaeota archaeon ex4572_27	Candidatus Geothermarchaeota archaeon ex4572_27	unclassified Candidatus Geothermarchaeota	unclassified Candidatus Geothermarchaeota	unclassified Candidatus Geothermarchaeota	unclassified Candidatus Geothermarchaeota	Candidatus Geothermarchaeota	Archaea	NJEN01000031.1	PCN50444.1	A	A-1	B6U99_04455	>B6U99_04455(COG1152)	>B6U99_04460(COG1880)	>B6U99_04465(COG1614)	>B6U99_04470(COG2069)	>B6U99_04475(COG2069)	>B6U99_04480(COG1456)	<B6U99_04485(COG3894)	<B6U99_04490(COG3640)
GCA_002490245.1_ASM249024v1_genomic.gff	MAG	2041147	Candidatus Bathyarchaeota archaeon B24-2	Candidatus Bathyarchaeota archaeon B24-2	unclassified Candidatus Bathyarchaeota	unclassified Candidatus Bathyarchaeota	unclassified Candidatus Bathyarchaeota	unclassified Candidatus Bathyarchaeota	Candidatus Bathyarchaeota	Archaea	PCNA01000017.1	PDM26655.1	A	A-1	CP083_02570	<CP083_02560(COG1614)	<CP083_02565(COG1880)	<CP083_02570(COG1152)	<CP083_02575(COG1522)
GCA_002733945.1_ASM273394v1_genomic.gff	MAG	2022749	Sulfurimonas sp.	Sulfurimonas sp.	Sulfurimonas	Helicobacteraceae	Campylobacterales	Epsilonproteobacteria	Proteobacteria	Bacteria	NVXO01000007.1	PHR13340.1	F	F-1	COA39_08200	>COA39_08185(COG0642)	>COA39_08190(COG0745)	<COA39_08195(COG3640)	<COA39_08200(COG1151)	<COA39_08205(COG1142)	<COA39_08210(COG0642)
GCA_002733995.1_ASM273399v1_genomic.gff	MAG	2030813	Desulfotalea sp.	Desulfotalea sp.	Desulfotalea	Desulfobulbaceae	Desulfobacterales	Deltaproteobacteria	Proteobacteria	Bacteria	NVXR01000009.1	PHR28118.1	E	E-1	COA36_07550	>COA36_07540(COG3894)	>COA36_07545(COG2069)	>COA36_07550(COG1151)	>COA36_07555(COG1614)	>COA36_07560(COG1456)	>COA36_07565(COG1410)	>COA36_07570	>COA36_07575(COG3640)	>COA36_07580(COG1151)	>COA36_07585	>COA36_07590(COG0840)
GCA_002733995.1_ASM273399v1_genomic.gff	MAG	2030813	Desulfotalea sp.	Desulfotalea sp.	Desulfotalea	Desulfobulbaceae	Desulfobacterales	Deltaproteobacteria	Proteobacteria	Bacteria	NVXR01000009.1	PHR28124.1	E	E-1	COA36_07580	Overlapping to the genomic context of COA36_07550
GCA_002733995.1_ASM273399v1_genomic.gff	MAG	2030813	Desulfotalea sp.	Desulfotalea sp.	Desulfotalea	Desulfobulbaceae	Desulfobacterales	Deltaproteobacteria	Proteobacteria	Bacteria	NVXR01000013.1	PHR27441.1	E	E-2	COA36_09450	<COA36_09440	<COA36_09445(COG3005)	<COA36_09450(COG1151)	<COA36_09455(COG0664)	<COA36_09460(COG2814)	<COA36_09465(COG0642)
GCA_002748815.1_ASM274881v1_genomic.gff	MAG	2044940	Desulfobacterales bacterium	Desulfobacterales bacterium	unclassified Desulfobacterales	unclassified Desulfobacterales	Desulfobacterales	Deltaproteobacteria	Proteobacteria	Bacteria	PDTH01000088.1	PIE64802.1	E	E-1	CSA26_06335	<CSA26_06310(COG3640)	<CSA26_06315	<CSA26_06320(COG1410)	<CSA26_06325(COG1456)	<CSA26_06330(COG1614)	<CSA26_06335(COG1151)	<CSA26_06340(COG2069)	<CSA26_06345(COG3894)
GCA_002762655.1_ASM276265v1_genomic.gff	MAG	2014242	Candidatus Altiarchaeum sp. CG12_big_fil_rev_8_21_14_0_65_33_22	Candidatus Altiarchaeum sp. CG12_big_fil_rev_8_21_14_0_65_33_22	Candidatus Altiarchaeum	unclassified Candidatus Altiarchaeales	Candidatus Altiarchaeales	unclassified Euryarchaeota	Euryarchaeota	Archaea	PCUZ01000163.1	PIN67054.1	A	A-2	COV98_04980	<COV98_04980(COG1152)	<COV98_04985	<COV98_04990(COG1152)
GCA_002771195.1_ASM277119v1_genomic.gff	MAG	1974756	Candidatus Omnitrophica bacterium CG23_combo_of_CG06-09_8_20_14_all_40_11	Candidatus Omnitrophica bacterium CG23_combo_of_CG06-09_8_20_14_all_40_11	unclassified Candidatus Omnitrophica	unclassified Candidatus Omnitrophica	unclassified Candidatus Omnitrophica	unclassified Candidatus Omnitrophica	Candidatus Omnitrophica	Bacteria	PCRL01000053.1	PIP20886.1	E	E-1	COX40_02360	<COX40_02345(COG1614)	<COX40_02350(COG1251)	<COX40_02355(COG0437)	<COX40_02360(COG1151)	<COX40_02365(COG0685)	<COX40_02370(COG0190)	<COX40_02375(COG3404)	<COX40_02380(COG2759)	<COX40_02385(COG0792)	<COX40_02390(COG0164)	<COX40_02395(COG0335)	<COX40_02400(COG0336)	<COX40_02405(COG0343)	<COX40_02410(COG0809)	<COX40_02415(COG2385)	<COX40_02420	<COX40_02425(COG1636)
GCA_002771315.1_ASM277131v1_genomic.gff	MAG	1973984	Desulfobacterales bacterium CG23_combo_of_CG06-09_8_20_14_all_52_9	Desulfobacterales bacterium CG23_combo_of_CG06-09_8_20_14_all_52_9	unclassified Desulfobacterales	unclassified Desulfobacterales	Desulfobacterales	Deltaproteobacteria	Proteobacteria	Bacteria	PCSF01000264.1	PIP35309.1	E	E-1	COX20_11850	<COX20_11850(COG1151)
GCA_002771475.1_ASM277147v1_genomic.gff	MAG	1974755	Candidatus Omnitrophica bacterium CG22_combo_CG10-13_8_21_14_all_43_16	Candidatus Omnitrophica bacterium CG22_combo_CG10-13_8_21_14_all_43_16	unclassified Candidatus Omnitrophica	unclassified Candidatus Omnitrophica	unclassified Candidatus Omnitrophica	unclassified Candidatus Omnitrophica	Candidatus Omnitrophica	Bacteria	PCTH01000067.1	PIP67724.1	E	E-1	COW92_04905	<COW92_04890	<COW92_04895	<COW92_04900(COG0437)	<COW92_04905(COG1151)	<COW92_04910(COG3640)	<COW92_04915(COG0685)	<COW92_04920(COG0190)	<COW92_04925(COG3404)	<COW92_04930(COG2759)	<COW92_04935(COG0792)	<COW92_04940(COG0164)	<COW92_04945(COG0335)	<COW92_04950(COG0336)	<COW92_04955(COG0228)	<COW92_04960(COG0766)	<COW92_04965(COG2890)	<COW92_04970(COG0216)	<COW92_04975(COG0254)	<COW92_04980(COG1158)
GCA_002771815.1_ASM277181v1_genomic.gff	MAG	1974101	Syntrophobacterales bacterium CG23_combo_of_CG06-09_8_20_14_all_48_27	Syntrophobacterales bacterium CG23_combo_of_CG06-09_8_20_14_all_48_27	unclassified Syntrophobacterales	unclassified Syntrophobacterales	Syntrophobacterales	Deltaproteobacteria	Proteobacteria	Bacteria	PCQZ01000429.1	PIP04898.1	A	A-4	COX52_14920	>COX52_14890(COG1239)	>COX52_14895(COG3640)	>COX52_14900(COG1614)	>COX52_14905(COG1614)	>COX52_14910(COG1239)	>COX52_14915	>COX52_14920(COG1152)	>COX52_14925(COG1880)	>COX52_14930(COG2852)	>COX52_14935	>COX52_14940(COG1029)	>COX52_14945(COG1153)	>COX52_14950(COG1456)	>COX52_14955	>COX52_14960	>COX52_14965(COG0589)	>COX52_14970(COG4447)	>COX52_14975(COG1033)	>COX52_14980
GCA_002772195.1_ASM277219v1_genomic.gff	MAG	1973983	Desulfobacterales bacterium CG23_combo_of_CG06-09_8_20_14_all_51_8	Desulfobacterales bacterium CG23_combo_of_CG06-09_8_20_14_all_51_8	unclassified Desulfobacterales	unclassified Desulfobacterales	Desulfobacterales	Deltaproteobacteria	Proteobacteria	Bacteria	PCSG01000192.1	PIP39622.1	E	E-1	COX19_07425	<COX19_07405	<COX19_07410(COG1410)	<COX19_07415(COG1456)	<COX19_07420	<COX19_07425(COG1151)
GCA_002772275.1_ASM277227v1_genomic.gff	MAG	1973980	Deltaproteobacteria bacterium CG23_combo_of_CG06-09_8_20_14_all_51_20	Deltaproteobacteria bacterium CG23_combo_of_CG06-09_8_20_14_all_51_20	unclassified Deltaproteobacteria	unclassified Deltaproteobacteria	unclassified Deltaproteobacteria	Deltaproteobacteria	Proteobacteria	Bacteria	PCSJ01000184.1	PIP45647.1	E	E-1	COX16_12220	>COX16_12175	>COX16_12180	>COX16_12185(COG0735)	>COX16_12190(COG1592)	>COX16_12195(COG2033)	>COX16_12200	>COX16_12205	>COX16_12210(COG0426)	>COX16_12215	>COX16_12220(COG1151)	>COX16_12225(COG0778)	>COX16_12230(COG0607)
GCA_002772305.1_ASM277230v1_genomic.gff	MAG	1973981	Deltaproteobacteria bacterium CG23_combo_of_CG06-09_8_20_14_all_60_8	Deltaproteobacteria bacterium CG23_combo_of_CG06-09_8_20_14_all_60_8	unclassified Deltaproteobacteria	unclassified Deltaproteobacteria	unclassified Deltaproteobacteria	Deltaproteobacteria	Proteobacteria	Bacteria	PCSI01000254.1	PIP42921.1	E	E-1	COX17_09885	>COX17_09885(COG1151)	>COX17_09890(COG2069)	>COX17_09895(COG1614)	>COX17_09900(COG1456)	>COX17_09905(COG3383)	>COX17_09910(COG1148)	>COX17_09915	>COX17_09920
GCA_002774505.1_ASM277450v1_genomic.gff	MAG	1974068	Nitrospirae bacterium CG08_land_8_20_14_0_20_52_24	Nitrospirae bacterium CG08_land_8_20_14_0_20_52_24	unclassified Nitrospirae	unclassified Nitrospirae	unclassified Nitrospirae	unclassified Nitrospirae	Nitrospirae	Bacteria	PEYF01000234.1	PIS36354.1	E	E-1	COT35_11660	>COT35_11615(COG0685)	>COT35_11620(COG0413)	>COT35_11625(COG1351)	>COT35_11630(COG3640)	>COT35_11635(COG5495)	>COT35_11640(COG1410)	>COT35_11645(COG2069)	>COT35_11650(COG1456)	>COT35_11655(COG1614)	>COT35_11660(COG1151)	>COT35_11665(COG1905)	>COT35_11670(COG1894)	>COT35_11675(COG3383)	>COT35_11680(COG0664)	>COT35_11685(COG2759)	>COT35_11690	>COT35_11695(COG3894)
GCA_002779205.1_ASM277920v1_genomic.gff	MAG	1973893	Actinobacteria bacterium CG08_land_8_20_14_0_20_35_9	Actinobacteria bacterium CG08_land_8_20_14_0_20_35_9	unclassified Actinobacteria	unclassified Actinobacteria	unclassified Actinobacteria	unclassified Actinobacteria	Actinobacteria	Bacteria	PEXF01000055.1	PIU29226.1	E	E-1	COT09_01955	<COT09_01935(COG0190)	<COT09_01940(COG2759)	<COT09_01945(COG1456)	<COT09_01950(COG1614)	<COT09_01955(COG1151)	<COT09_01960(COG2069)	<COT09_01965(COG3640)	<COT09_01970(COG3894)
GCA_002779465.1_ASM277946v1_genomic.gff	MAG	1973982	Desulfobacterales bacterium CG07_land_8_20_14_0_80_52_14	Desulfobacterales bacterium CG07_land_8_20_14_0_80_52_14	unclassified Desulfobacterales	unclassified Desulfobacterales	Desulfobacterales	Deltaproteobacteria	Proteobacteria	Bacteria	PEWO01000044.1	PIU50218.1	E	E-1	COS92_02725	<COS92_02685(COG1243)	<COS92_02690(COG0571)	<COS92_02695(COG0613)	<COS92_02700(COG1734)	<COS92_02705	<COS92_02710(COG1410)	<COS92_02715(COG1456)	<COS92_02720(COG1614)	<COS92_02725(COG1151)	<COS92_02730(COG2069)	<COS92_02735(COG3894)
GCA_002779465.1_ASM277946v1_genomic.gff	MAG	1973982	Desulfobacterales bacterium CG07_land_8_20_14_0_80_52_14	Desulfobacterales bacterium CG07_land_8_20_14_0_80_52_14	unclassified Desulfobacterales	unclassified Desulfobacterales	Desulfobacterales	Deltaproteobacteria	Proteobacteria	Bacteria	PEWO01000056.1	PIU50010.1	E	E-1	COS92_03640	>COS92_03635(COG1142)	>COS92_03640(COG1151)	>COS92_03645(COG1905)	>COS92_03650(COG1894)	>COS92_03655(COG1034)	<COS92_03660(COG0642)
GCA_002779575.1_ASM277957v1_genomic.gff	MAG	1973916	Armatimonadetes bacterium CG07_land_8_20_14_0_80_40_9	Armatimonadetes bacterium CG07_land_8_20_14_0_80_40_9	unclassified Armatimonadetes	unclassified Armatimonadetes	unclassified Armatimonadetes	unclassified Armatimonadetes	Armatimonadetes	Bacteria	PEWG01000485.1	PIU62944.1	E	E-1	COS84_10100	>COS84_10090(COG1034)	>COS84_10095	>COS84_10100(COG1151)
GCA_002779905.1_ASM277990v1_genomic.gff	MAG	1974100	Syntrophobacterales bacterium CG03_land_8_20_14_0_80_58_14	Syntrophobacterales bacterium CG03_land_8_20_14_0_80_58_14	unclassified Syntrophobacterales	unclassified Syntrophobacterales	Syntrophobacterales	Deltaproteobacteria	Proteobacteria	Bacteria	PEVF01000015.1	PIV07169.1	E	E-1	COS57_00740	>COS57_00720(COG0685)	<COS57_00725(COG1410)	<COS57_00730(COG1456)	<COS57_00735(COG1614)	<COS57_00740(COG1151)	<COS57_00745(COG2069)	<COS57_00750(COG0190)	<COS57_00755(COG3640)	<COS57_00760(COG3894)	<COS57_00765(COG2759)
GCA_002780005.1_ASM278000v1_genomic.gff	MAG	1974741	Candidatus Omnitrophica bacterium CG07_land_8_20_14_0_80_42_15	Candidatus Omnitrophica bacterium CG07_land_8_20_14_0_80_42_15	unclassified Candidatus Omnitrophica	unclassified Candidatus Omnitrophica	unclassified Candidatus Omnitrophica	unclassified Candidatus Omnitrophica	Candidatus Omnitrophica	Bacteria	PEWV01000022.1	PIU42049.1	E	E-1	COS99_02355	>COS99_02280(COG0237)	>COS99_02285(COG1158)	>COS99_02290(COG0254)	>COS99_02295(COG0216)	>COS99_02300(COG2890)	>COS99_02305(COG0766)	>COS99_02310(COG0228)	>COS99_02315(COG0336)	>COS99_02320(COG0335)	>COS99_02325(COG0164)	>COS99_02330(COG2759)	>COS99_02335(COG3404)	>COS99_02340(COG0190)	>COS99_02345(COG0685)	>COS99_02350(COG3640)	>COS99_02355(COG1151)	>COS99_02360(COG0437)	>COS99_02365(COG1251)	>COS99_02370(COG1614)	>COS99_02375(COG1456)	>COS99_02380(COG3894)	>COS99_02385(COG3640)	>COS99_02390(COG2069)	>COS99_02395(COG1410)	>COS99_02400(COG0413)	>COS99_02405(COG1893)
GCA_002780205.1_ASM278020v1_genomic.gff	MAG	2014307	Elusimicrobia bacterium CG06_land_8_20_14_3_00_38_11	Elusimicrobia bacterium CG06_land_8_20_14_3_00_38_11	unclassified Elusimicrobia	unclassified Elusimicrobia	unclassified Elusimicrobia	unclassified Elusimicrobia	Elusimicrobia	Bacteria	PEVQ01000174.1	PIU83285.1	E	E-1	COS68_04850	>COS68_04845(COG3640)	>COS68_04850(COG1151)
GCA_002780285.1_ASM278028v1_genomic.gff	MAG	1974435	Candidatus Pacearchaeota archaeon CG06_land_8_20_14_3_00_35_12	Candidatus Pacearchaeota archaeon CG06_land_8_20_14_3_00_35_12	unclassified Candidatus Pacearchaeota	unclassified Candidatus Pacearchaeota	unclassified Candidatus Pacearchaeota	unclassified Candidatus Pacearchaeota	Candidatus Pacearchaeota	Archaea	PEVX01000025.1	PIU75765.1	F	others	COS75_02470	<COS75_02430(COG1278)	<COS75_02435	<COS75_02440(COG0655)	<COS75_02445	<COS75_02450	<COS75_02455(COG2512)	<COS75_02460(COG0822)	<COS75_02465	<COS75_02470(COG1151)	<COS75_02475(COG1104)	<COS75_02480(COG0640)	<COS75_02485(COG1141)	<COS75_02490
GCA_002781045.1_ASM278104v1_genomic.gff	MAG	2014305	Elusimicrobia bacterium CG02_land_8_20_14_3_00_37_13	Elusimicrobia bacterium CG02_land_8_20_14_3_00_37_13	unclassified Elusimicrobia	unclassified Elusimicrobia	unclassified Elusimicrobia	unclassified Elusimicrobia	Elusimicrobia	Bacteria	PETR01000021.1	PIV53905.1	E	E-1	COS17_01290	<COS17_01285(COG1237)	<COS17_01290(COG1151)	<COS17_01295(COG1832)	<COS17_01300	<COS17_01305(COG1225)	<COS17_01310(COG0785)	<COS17_01315	<COS17_01320(COG1051)	<COS17_01325(COG4022)	<COS17_01330(COG0428)	<COS17_01335(COG3118)	<COS17_01340(COG0192)	<COS17_01345(COG0242)	<COS17_01350(COG1578)	<COS17_01355(COG0489)	<COS17_01360	<COS17_01365(COG0731)
GCA_002781085.1_ASM278108v1_genomic.gff	MAG	1973932	Caldiserica bacterium CG02_land_8_20_14_3_00_36_38	Caldiserica bacterium CG02_land_8_20_14_3_00_36_38	unclassified Caldiserica	unclassified Caldiserica	unclassified Caldiserica	unclassified Caldiserica	Caldiserica	Bacteria	PETP01000088.1	PIV55806.1	E	E-1	COS15_02950	<COS15_02930(COG3640)	<COS15_02935(COG1034)	<COS15_02940(COG1894)	<COS15_02945(COG1905)	<COS15_02950(COG1151)	<COS15_02955(COG0437)	<COS15_02960	<COS15_02965
GCA_002781165.1_ASM278116v1_genomic.gff	MAG	2014290	bacterium (Candidatus Ratteibacteria) CG01_land_8_20_14_3_00_40_19	bacterium (Candidatus Ratteibacteria) CG01_land_8_20_14_3_00_40_19	unclassified Bacteria	unclassified Bacteria	unclassified Bacteria	unclassified Bacteria	unclassified Bacteria	Bacteria	PETL01000351.1	PIV63458.1	E	E-1	COS11_07320	<COS11_07320(COG1151)	<COS11_07325(COG1251)
GCA_002782605.1_ASM278260v1_genomic.gff	MAG	1973961	Deltaproteobacteria bacterium CG_4_8_14_3_um_filter_43_13	Deltaproteobacteria bacterium CG_4_8_14_3_um_filter_43_13	unclassified Deltaproteobacteria	unclassified Deltaproteobacteria	unclassified Deltaproteobacteria	Deltaproteobacteria	Proteobacteria	Bacteria	PFIF01000130.1	PIX24817.1	A	A-6	COZ68_05440	>COZ68_05440(COG1152)	>COZ68_05445(COG1880)	>COZ68_05450(COG1614)	>COZ68_05455(COG1614)	>COZ68_05460
GCA_002784205.1_ASM278420v1_genomic.gff	MAG	1973959	Deltaproteobacteria bacterium CG_4_10_14_3_um_filter_51_14	Deltaproteobacteria bacterium CG_4_10_14_3_um_filter_51_14	unclassified Deltaproteobacteria	unclassified Deltaproteobacteria	unclassified Deltaproteobacteria	Deltaproteobacteria	Proteobacteria	Bacteria	PFKK01000248.1	PIY22531.1	E	E-1	COZ11_12295	>COZ11_12250	>COZ11_12255	>COZ11_12260(COG0735)	>COZ11_12265(COG1592)	>COZ11_12270(COG2033)	>COZ11_12275	>COZ11_12280	>COZ11_12285(COG0426)	>COZ11_12290	>COZ11_12295(COG1151)	>COZ11_12300(COG0778)	>COZ11_12305(COG0607)
GCA_002787765.1_ASM278776v1_genomic.gff	MAG	1973977	Deltaproteobacteria bacterium CG12_big_fil_rev_8_21_14_0_65_43_10	Deltaproteobacteria bacterium CG12_big_fil_rev_8_21_14_0_65_43_10	unclassified Deltaproteobacteria	unclassified Deltaproteobacteria	unclassified Deltaproteobacteria	Deltaproteobacteria	Proteobacteria	Bacteria	PCUT01000058.1	PIQ46472.1	A	A-6	COW04_01925	<COW04_01915(COG1614)	<COW04_01920(COG1880)	<COW04_01925(COG1152)
GCA_002787765.1_ASM278776v1_genomic.gff	MAG	1973977	Deltaproteobacteria bacterium CG12_big_fil_rev_8_21_14_0_65_43_10	Deltaproteobacteria bacterium CG12_big_fil_rev_8_21_14_0_65_43_10	unclassified Deltaproteobacteria	unclassified Deltaproteobacteria	unclassified Deltaproteobacteria	Deltaproteobacteria	Proteobacteria	Bacteria	PCUT01000086.1	PIQ46222.1	E	E-1	COW04_03325	>COW04_03320	>COW04_03325(COG1151)	>COW04_03330(COG1614)	>COW04_03335(COG1456)
GCA_002789975.1_ASM278997v1_genomic.gff	MAG	1973966	Deltaproteobacteria bacterium CG_4_9_14_3_um_filter_51_14	Deltaproteobacteria bacterium CG_4_9_14_3_um_filter_51_14	unclassified Deltaproteobacteria	unclassified Deltaproteobacteria	unclassified Deltaproteobacteria	Deltaproteobacteria	Proteobacteria	Bacteria	PFUF01000229.1	PJB34681.1	E	others	CO107_12540	>CO107_12495	>CO107_12500	>CO107_12505(COG0735)	>CO107_12510(COG1592)	>CO107_12515(COG2033)	>CO107_12520	>CO107_12525	>CO107_12530(COG0426)	>CO107_12535	>CO107_12540(COG1151)	>CO107_12545(COG0778)	>CO107_12550(COG0607)
GCA_002791235.1_ASM279123v1_genomic.gff	MAG	1974099	Syntrophobacterales bacterium CG_4_9_14_3_um_filter_49_8	Syntrophobacterales bacterium CG_4_9_14_3_um_filter_49_8	unclassified Syntrophobacterales	unclassified Syntrophobacterales	Syntrophobacterales	Deltaproteobacteria	Proteobacteria	Bacteria	PFWR01000024.1	PJA50596.1	A	A-4	CO171_00850	>CO171_00820(COG0714)	>CO171_00825(COG3640)	>CO171_00830(COG1614)	>CO171_00835(COG1614)	>CO171_00840	>CO171_00845	>CO171_00850(COG1152)	>CO171_00855(COG1880)	>CO171_00860(COG2852)	>CO171_00865	>CO171_00870(COG1029)
GCA_002791615.1_ASM279161v1_genomic.gff	MAG	1973958	Deltaproteobacteria bacterium CG_4_10_14_0_8_um_filter_43_12	Deltaproteobacteria bacterium CG_4_10_14_0_8_um_filter_43_12	unclassified Deltaproteobacteria	unclassified Deltaproteobacteria	unclassified Deltaproteobacteria	Deltaproteobacteria	Proteobacteria	Bacteria	PFMT01000417.1	PIZ18584.1	A	A-4	COY50_14515	>COY50_14515(COG1152)	>COY50_14520	>COY50_14525	>COY50_14530	>COY50_14535	>COY50_14540(COG0613)	>COY50_14545(COG1239)	>COY50_14550(COG3640)	>COY50_14555(COG1029)	>COY50_14560(COG1153)
GCA_002796125.1_ASM279612v1_genomic.gff	MAG	1974746	Candidatus Omnitrophica bacterium CG11_big_fil_rev_8_21_14_0_20_42_13	Candidatus Omnitrophica bacterium CG11_big_fil_rev_8_21_14_0_20_42_13	unclassified Candidatus Omnitrophica	unclassified Candidatus Omnitrophica	unclassified Candidatus Omnitrophica	unclassified Candidatus Omnitrophica	Candidatus Omnitrophica	Bacteria	PCWA01000073.1	PIQ89119.1	E	E-1	COV72_04820	<COV72_04795(COG0426)	<COV72_04800(COG1853)	<COV72_04805(COG0694)	<COV72_04810(COG1149)	<COV72_04815	<COV72_04820(COG1151)	<COV72_04825(COG3640)	<COV72_04830(COG1251)	<COV72_04835	<COV72_04840	<COV72_04845(COG1959)	<COV72_04850
GCA_002796565.1_ASM279656v1_genomic.gff	MAG	1973903	Anaerolineae bacterium CG_4_9_14_0_8_um_filter_58_9	Anaerolineae bacterium CG_4_9_14_0_8_um_filter_58_9	unclassified Anaerolineae	unclassified Anaerolineae	unclassified Anaerolineae	Anaerolineae	Chloroflexi	Bacteria	PFSP01000356.1	PJH74892.1	E	E-1	CO064_09535	<CO064_09535(COG1151)	<CO064_09540(COG2608)
GCA_002797975.1_ASM279797v1_genomic.gff	-	1286362	[Clostridium] celerecrescens 18A	[Clostridium] celerecrescens	Lachnoclostridium	Lachnospiraceae	Clostridiales	Clostridia	Firmicutes	Bacteria	PGET01000001.1	PJJ29449.1	D	D-1	H171_2991	<H171_2981(COG1879)	<H171_2982	<H171_2982	<H171_2983(COG2186)	<H171_2984(COG0383)	<H171_2985(COG0395)	<H171_2986(COG1175)	<H171_2987(COG1653)	<H171_2988(COG1653)	<H171_2989(COG4753)	<H171_2990(COG2972)	<H171_2991(COG1151)	<H171_2992(COG0020)	<H171_2993(COG0446)	<H171_2994(COG1823)	<H171_2995(COG1168)	>H171_2996(COG1846)
GCA_002798115.1_ASM279811v1_genomic.gff	-	157842	Desulfofaba hansenii	Desulfofaba hansenii	Desulfofaba	Desulfobacteraceae	Desulfobacterales	Deltaproteobacteria	Proteobacteria	Bacteria	PESK01000001.1	PJJ92621.1	E	E-1	CKJ97_00155	<CKJ97_00140(COG1410)	<CKJ97_00145(COG1456)	<CKJ97_00150(COG1614)	<CKJ97_00155(COG1151)	<CKJ97_00160(COG2069)	<CKJ97_00165(COG3894)	>CKJ97_00170(COG2759)	>CKJ97_00175(COG0190)	>CKJ97_00180(COG3640)
GCA_002798115.1_ASM279811v1_genomic.gff	-	157842	Desulfofaba hansenii	Desulfofaba hansenii	Desulfofaba	Desulfobacteraceae	Desulfobacterales	Deltaproteobacteria	Proteobacteria	Bacteria	PESK01000050.1	PJJ89206.1	E	E-2	CKJ97_18415	<CKJ97_18415(COG1151)	<CKJ97_18420(COG0664)
GCA_002798115.1_ASM279811v1_genomic.gff	-	157842	Desulfofaba hansenii	Desulfofaba hansenii	Desulfofaba	Desulfobacteraceae	Desulfobacterales	Deltaproteobacteria	Proteobacteria	Bacteria	PESK01000068.1	PJJ88646.1	E	E-1	CKJ97_21415	<CKJ97_21410	<CKJ97_21415(COG1151)
GCA_900066065.1_12718_7_93_genomic.gff	MAG	165186	uncultured Ruminococcus sp.	uncultured Ruminococcus sp.	Ruminococcus	Ruminococcaceae	Clostridiales	Clostridia	Firmicutes	Bacteria	FMEZ01000002.1	SCH12688.1	E	E-1	SAMEA2393090_00343	<SAMEA2393090_00334(COG0190)	<SAMEA2393090_00335(COG3404)	<SAMEA2393090_00336(COG3894)	<SAMEA2393090_00337(COG1410)	<SAMEA2393090_00338(COG1456)	<SAMEA2393090_00339(COG2069)	<SAMEA2393090_00341(COG1614)	<SAMEA2393090_00342(COG3640)	<SAMEA2393090_00343(COG1151)	<SAMEA2393090_00344(COG3640)	<SAMEA2393090_00345(COG0685)	<SAMEA2393090_00346	<SAMEA2393090_00347	<SAMEA2393090_00348	<SAMEA2393090_00349(COG1101)	<SAMEA2393090_00350(COG4120)
GCA_900066065.1_12718_7_93_genomic.gff	MAG	165186	uncultured Ruminococcus sp.	uncultured Ruminococcus sp.	Ruminococcus	Ruminococcaceae	Clostridiales	Clostridia	Firmicutes	Bacteria	FMEZ01000015.1	SCH89912.1	B	B-1	SAMEA2393090_01499	<SAMEA2393090_01496(COG1116)	<SAMEA2393090_01497(COG0600)	<SAMEA2393090_01498(COG0715)	<SAMEA2393090_01499(COG1151)
GCA_900066075.1_12718_7_94_genomic.gff	MAG	59620	uncultured Clostridium sp.	uncultured Clostridium sp.	Clostridium	Clostridiaceae	Clostridiales	Clostridia	Firmicutes	Bacteria	FMDQ01000001.1	SCG95527.1	E	E-1	SAMEA2393091_00233	<SAMEA2393091_00220(COG0119)	<SAMEA2393091_00221(COG1454)	<SAMEA2393091_00223	<SAMEA2393091_00224(COG0190)	<SAMEA2393091_00225(COG3404)	<SAMEA2393091_00226	<SAMEA2393091_00227(COG3894)	<SAMEA2393091_00228(COG1410)	<SAMEA2393091_00229(COG1456)	<SAMEA2393091_00230(COG2069)	<SAMEA2393091_00231(COG1614)	<SAMEA2393091_00232(COG3640)	<SAMEA2393091_00233(COG1151)	<SAMEA2393091_00234(COG3640)	<SAMEA2393091_00235	<SAMEA2393091_00236	<SAMEA2393091_00237(COG0685)
GCA_900066085.1_12718_7_95_genomic.gff	MAG	765821	uncultured Blautia sp.	uncultured Blautia sp.	Blautia	Lachnospiraceae	Clostridiales	Clostridia	Firmicutes	Bacteria	FMEQ01000016.1	SCH76863.1	E	E-1	SAMEA2393092_02459	<SAMEA2393092_02443(COG4624)	<SAMEA2393092_02444(COG1894)	<SAMEA2393092_02445(COG1905)	>SAMEA2393092_02446(COG4624)	<SAMEA2393092_02447	<SAMEA2393092_02448(COG0190)	<SAMEA2393092_02449(COG3404)	<SAMEA2393092_02450(COG2759)	<SAMEA2393092_02451	<SAMEA2393092_02452(COG3894)	<SAMEA2393092_02453(COG1410)	<SAMEA2393092_02454(COG1456)	<SAMEA2393092_02455(COG2069)	<SAMEA2393092_02456(COG1614)	<SAMEA2393092_02457(COG1614)	<SAMEA2393092_02458(COG3640)	<SAMEA2393092_02459(COG1151)	<SAMEA2393092_02460(COG3640)	<SAMEA2393092_02461(COG0685)	<SAMEA2393092_02462	<SAMEA2393092_02463
GCA_900066135.1_13414_6_15_genomic.gff	MAG	59620	uncultured Clostridium sp.	uncultured Clostridium sp.	Clostridium	Clostridiaceae	Clostridiales	Clostridia	Firmicutes	Bacteria	FMDP01000001.1	SCG86988.1	E	E-1	SAMEA3545239_00055	<SAMEA3545239_00049(COG3894)	<SAMEA3545239_00050(COG1410)	<SAMEA3545239_00051(COG1456)	<SAMEA3545239_00052(COG2069)	<SAMEA3545239_00053(COG1614)	<SAMEA3545239_00054(COG3640)	<SAMEA3545239_00055(COG1151)	<SAMEA3545239_00056(COG3640)	<SAMEA3545239_00057(COG0685)	<SAMEA3545239_00058	<SAMEA3545239_00059	<SAMEA3545239_00060	<SAMEA3545239_00061(COG1101)	<SAMEA3545239_00062(COG4120)	<SAMEA3545239_00063(COG2984)	<SAMEA3545239_00064(COG0240)	<SAMEA3545239_00065(COG0344)	<SAMEA3545239_00066(COG1160)	<SAMEA3545239_00067(COG1625)
GCA_900066145.1_13414_6_20_genomic.gff	MAG	765821	uncultured Blautia sp.	uncultured Blautia sp.	Blautia	Lachnospiraceae	Clostridiales	Clostridia	Firmicutes	Bacteria	FMEX01000004.1	SCH42902.1	E	E-1	SAMEA3545244_01487	<SAMEA3545244_01476(COG0190)	<SAMEA3545244_01477(COG3404)	<SAMEA3545244_01478(COG2759)	<SAMEA3545244_01479	<SAMEA3545244_01480(COG3894)	<SAMEA3545244_01481(COG1410)	<SAMEA3545244_01482(COG1456)	<SAMEA3545244_01483(COG2069)	<SAMEA3545244_01484(COG1614)	<SAMEA3545244_01485(COG1614)	<SAMEA3545244_01486(COG3640)	<SAMEA3545244_01487(COG1151)	<SAMEA3545244_01488(COG3640)	<SAMEA3545244_01489(COG0685)	<SAMEA3545244_01490(COG1532)	<SAMEA3545244_01491
GCA_900066165.1_13414_6_28_genomic.gff	MAG	765821	uncultured Blautia sp.	uncultured Blautia sp.	Blautia	Lachnospiraceae	Clostridiales	Clostridia	Firmicutes	Bacteria	FMFA01000005.1	SCH61290.1	E	E-1	SAMEA3545252_00999	>SAMEA3545252_00995	>SAMEA3545252_00996	>SAMEA3545252_00997(COG0685)	>SAMEA3545252_00998(COG3640)	>SAMEA3545252_00999(COG1151)	>SAMEA3545252_01000(COG3640)	>SAMEA3545252_01001(COG1614)	>SAMEA3545252_01002(COG1614)	>SAMEA3545252_01003(COG2069)	>SAMEA3545252_01004(COG1456)	>SAMEA3545252_01005(COG1410)	>SAMEA3545252_01006(COG3894)	>SAMEA3545252_01007	>SAMEA3545252_01008(COG2759)	>SAMEA3545252_01009(COG3404)	>SAMEA3545252_01010(COG0190)	>SAMEA3545252_01011(COG2258)	>SAMEA3545252_01012(COG2896)	>SAMEA3545252_01013(COG1905)	>SAMEA3545252_01014(COG1894)	>SAMEA3545252_01015(COG4624)
GCA_900066175.1_13414_6_29_genomic.gff	MAG	165185	uncultured Eubacterium sp.	uncultured Eubacterium sp.	Eubacterium	Eubacteriaceae	Clostridiales	Clostridia	Firmicutes	Bacteria	FMEO01000008.1	SCH59440.1	C	C-4	SAMEA3545253_01355	<SAMEA3545253_01354(COG4624)	<SAMEA3545253_01355(COG1151)
GCA_900066205.1_13414_6_32_genomic.gff	MAG	765821	uncultured Blautia sp.	uncultured Blautia sp.	Blautia	Lachnospiraceae	Clostridiales	Clostridia	Firmicutes	Bacteria	FMFK01000005.1	SCH93581.1	E	E-1	SAMEA3545256_02050	<SAMEA3545256_02035(COG4624)	<SAMEA3545256_02036(COG1894)	<SAMEA3545256_02037(COG1905)	>SAMEA3545256_02038(COG4624)	<SAMEA3545256_02039	<SAMEA3545256_02040(COG0190)	<SAMEA3545256_02041(COG3404)	<SAMEA3545256_02042(COG2759)	<SAMEA3545256_02043	<SAMEA3545256_02044(COG3894)	<SAMEA3545256_02045(COG1410)	<SAMEA3545256_02046(COG1456)	<SAMEA3545256_02047(COG2069)	<SAMEA3545256_02048(COG1614)	<SAMEA3545256_02049(COG3640)	<SAMEA3545256_02050(COG1151)	<SAMEA3545256_02051(COG3640)	<SAMEA3545256_02052(COG0685)	<SAMEA3545256_02053	<SAMEA3545256_02054
GCA_900066305.1_13414_6_60_genomic.gff	MAG	165185	uncultured Eubacterium sp.	uncultured Eubacterium sp.	Eubacterium	Eubacteriaceae	Clostridiales	Clostridia	Firmicutes	Bacteria	FMDZ01000013.1	SCH92923.1	B	B-1	SAMEA3545284_02014	<SAMEA3545284_02011(COG1116)	<SAMEA3545284_02012(COG0600)	<SAMEA3545284_02013(COG0715)	<SAMEA3545284_02014(COG1151)	>SAMEA3545284_02015(COG1846)	>SAMEA3545284_02016(COG0534)
GCA_900066345.1_13414_6_65_genomic.gff	MAG	165186	uncultured Ruminococcus sp.	uncultured Ruminococcus sp.	Ruminococcus	Ruminococcaceae	Clostridiales	Clostridia	Firmicutes	Bacteria	FMEC01000004.1	SCH30107.1	E	E-1	SAMEA3545289_01132	<SAMEA3545289_01124	<SAMEA3545289_01125(COG3894)	<SAMEA3545289_01126(COG1410)	<SAMEA3545289_01127(COG1456)	<SAMEA3545289_01128(COG2069)	<SAMEA3545289_01129(COG1614)	<SAMEA3545289_01130(COG1614)	<SAMEA3545289_01131(COG3640)	<SAMEA3545289_01132(COG1151)	<SAMEA3545289_01133(COG3640)	<SAMEA3545289_01134(COG1532)	<SAMEA3545289_01135
GCA_900066355.1_13414_6_66_genomic.gff	MAG	165186	uncultured Ruminococcus sp.	uncultured Ruminococcus sp.	Ruminococcus	Ruminococcaceae	Clostridiales	Clostridia	Firmicutes	Bacteria	FMEL01000013.1	SCI47422.1	E	E-1	SAMEA3545290_02572	>SAMEA3545290_02568	>SAMEA3545290_02569(COG1532)	>SAMEA3545290_02570(COG0685)	>SAMEA3545290_02571(COG3640)	>SAMEA3545290_02572(COG1151)	>SAMEA3545290_02573(COG3640)	>SAMEA3545290_02574(COG1614)	>SAMEA3545290_02575(COG2069)	>SAMEA3545290_02576(COG1456)	>SAMEA3545290_02577(COG1410)	>SAMEA3545290_02578(COG3894)	>SAMEA3545290_02579	>SAMEA3545290_02580(COG2759)	>SAMEA3545290_02581(COG3404)	>SAMEA3545290_02582(COG0190)
GCA_900066385.1_13414_6_69_genomic.gff	MAG	59620	uncultured Clostridium sp.	uncultured Clostridium sp.	Clostridium	Clostridiaceae	Clostridiales	Clostridia	Firmicutes	Bacteria	FMDV01000007.1	SCH48426.1	E	E-1	SAMEA3545293_01664	<SAMEA3545293_01651(COG0561)	<SAMEA3545293_01652	<SAMEA3545293_01653(COG1453)	<SAMEA3545293_01654(COG1614)	<SAMEA3545293_01655(COG1126)	<SAMEA3545293_01656(COG0765)	<SAMEA3545293_01657(COG0834)	<SAMEA3545293_01658(COG1102)	<SAMEA3545293_01659(COG1410)	<SAMEA3545293_01660(COG1456)	<SAMEA3545293_01661(COG2069)	<SAMEA3545293_01662(COG1614)	<SAMEA3545293_01663(COG3640)	<SAMEA3545293_01664(COG1151)	<SAMEA3545293_01665(COG3640)	<SAMEA3545293_01666(COG0685)	<SAMEA3545293_01667	<SAMEA3545293_01668
GCA_900066495.1_13470_2_78_genomic.gff	MAG	59620	uncultured Clostridium sp.	uncultured Clostridium sp.	Clostridium	Clostridiaceae	Clostridiales	Clostridia	Firmicutes	Bacteria	FMFC01000005.1	SCI00038.1	E	E-1	SAMEA3545325_02115	>SAMEA3545325_02115(COG1151)	>SAMEA3545325_02116(COG3640)	>SAMEA3545325_02117(COG2759)	>SAMEA3545325_02118(COG3404)	>SAMEA3545325_02119(COG0190)	>SAMEA3545325_02120	>SAMEA3545325_02121(COG0685)	>SAMEA3545325_02122(COG1249)	>SAMEA3545325_02123(COG3640)	>SAMEA3545325_02124(COG2069)	>SAMEA3545325_02125(COG1456)	>SAMEA3545325_02126(COG1410)	>SAMEA3545325_02127(COG1614)	>SAMEA3545325_02128(COG0509)	<SAMEA3545325_02129(COG1063)	>SAMEA3545325_02130(COG3894)
GCA_900066495.1_13470_2_78_genomic.gff	MAG	59620	uncultured Clostridium sp.	uncultured Clostridium sp.	Clostridium	Clostridiaceae	Clostridiales	Clostridia	Firmicutes	Bacteria	FMFC01000010.1	SCI34182.1	C	C-1	SAMEA3545325_02973	<SAMEA3545325_02971(COG1251)	<SAMEA3545325_02972(COG0437)	<SAMEA3545325_02973(COG1151)	>SAMEA3545325_02974(COG1143)
GCA_900066505.1_13470_2_81_genomic.gff	MAG	765821	uncultured Blautia sp.	uncultured Blautia sp.	Blautia	Lachnospiraceae	Clostridiales	Clostridia	Firmicutes	Bacteria	FMFE01000003.1	SCH22620.1	E	E-1	SAMEA3545328_00445	<SAMEA3545328_00433	<SAMEA3545328_00434(COG0190)	<SAMEA3545328_00435(COG3404)	<SAMEA3545328_00436(COG2759)	<SAMEA3545328_00437	<SAMEA3545328_00438(COG3894)	<SAMEA3545328_00439(COG1410)	<SAMEA3545328_00440(COG1456)	<SAMEA3545328_00441(COG2069)	<SAMEA3545328_00442(COG1614)	<SAMEA3545328_00443(COG1614)	<SAMEA3545328_00444(COG3640)	<SAMEA3545328_00445(COG1151)	<SAMEA3545328_00446(COG3640)	<SAMEA3545328_00447(COG0685)	<SAMEA3545328_00448	<SAMEA3545328_00449
GCA_900066575.1_13470_2_93_genomic.gff	MAG	59620	uncultured Clostridium sp.	uncultured Clostridium sp.	Clostridium	Clostridiaceae	Clostridiales	Clostridia	Firmicutes	Bacteria	FMDX01000003.1	SCH30125.1	E	E-1	SAMEA3545340_00634	>SAMEA3545340_00630	>SAMEA3545340_00631	>SAMEA3545340_00632(COG0685)	>SAMEA3545340_00633(COG3640)	>SAMEA3545340_00634(COG1151)	>SAMEA3545340_00635(COG3640)	>SAMEA3545340_00636(COG1614)	>SAMEA3545340_00637(COG2069)	>SAMEA3545340_00638(COG1456)	>SAMEA3545340_00639(COG1410)	>SAMEA3545340_00640(COG1102)	>SAMEA3545340_00641(COG0834)	>SAMEA3545340_00642(COG0765)	>SAMEA3545340_00643(COG1126)	>SAMEA3545340_00644(COG1614)	>SAMEA3545340_00645(COG1453)	>SAMEA3545340_00646	>SAMEA3545340_00647(COG0561)
GCA_900066585.1_14207_7_6_genomic.gff	MAG	165185	uncultured Eubacterium sp.	uncultured Eubacterium sp.	Eubacterium	Eubacteriaceae	Clostridiales	Clostridia	Firmicutes	Bacteria	FMFP01000007.1	SCI90635.1	C	C-4	SAMEA3545347_01655	<SAMEA3545347_01654(COG4624)	<SAMEA3545347_01655(COG1151)
GCA_900066615.1_14207_7_13_genomic.gff	MAG	165186	uncultured Ruminococcus sp.	uncultured Ruminococcus sp.	Ruminococcus	Ruminococcaceae	Clostridiales	Clostridia	Firmicutes	Bacteria	FMHD01000019.1	SCJ91309.1	E	E-1	SAMEA3545354_02373	>SAMEA3545354_02366(COG4120)	>SAMEA3545354_02367(COG1101)	>SAMEA3545354_02368	>SAMEA3545354_02369	>SAMEA3545354_02370	>SAMEA3545354_02371(COG0685)	>SAMEA3545354_02372(COG3640)	>SAMEA3545354_02373(COG1151)	>SAMEA3545354_02374(COG3640)	>SAMEA3545354_02375(COG1614)	>SAMEA3545354_02376(COG2069)	>SAMEA3545354_02377(COG1456)	>SAMEA3545354_02378(COG1410)	>SAMEA3545354_02379(COG3894)	>SAMEA3545354_02380(COG3404)	>SAMEA3545354_02381(COG0190)
GCA_900066615.1_14207_7_13_genomic.gff	MAG	165186	uncultured Ruminococcus sp.	uncultured Ruminococcus sp.	Ruminococcus	Ruminococcaceae	Clostridiales	Clostridia	Firmicutes	Bacteria	FMHD01000025.1	SCJ94092.1	B	B-1	SAMEA3545354_02677	>SAMEA3545354_02677(COG1151)	>SAMEA3545354_02678(COG0715)	>SAMEA3545354_02679(COG0600)	>SAMEA3545354_02680(COG1116)
GCA_900066885.1_14207_7_61_genomic.gff	MAG	165186	uncultured Ruminococcus sp.	uncultured Ruminococcus sp.	Ruminococcus	Ruminococcaceae	Clostridiales	Clostridia	Firmicutes	Bacteria	FMGN01000009.1	SCJ23083.1	B	B-1	SAMEA3545401_02048	>SAMEA3545401_02044(COG1733)	>SAMEA3545401_02045(COG0715)	>SAMEA3545401_02046(COG0600)	>SAMEA3545401_02047(COG1116)	>SAMEA3545401_02048(COG1151)	>SAMEA3545401_02049	>SAMEA3545401_02050	>SAMEA3545401_02051(COG0388)
GCA_900066935.1_14207_7_75_genomic.gff	MAG	59620	uncultured Clostridium sp.	uncultured Clostridium sp.	Clostridium	Clostridiaceae	Clostridiales	Clostridia	Firmicutes	Bacteria	FMGS01000001.1	SCI98379.1	D	D-1	SAMEA3545415_01222	<SAMEA3545415_01222(COG1151)	<SAMEA3545415_01223(COG0277)	>SAMEA3545415_01224(COG1063)
GCA_900066935.1_14207_7_75_genomic.gff	MAG	59620	uncultured Clostridium sp.	uncultured Clostridium sp.	Clostridium	Clostridiaceae	Clostridiales	Clostridia	Firmicutes	Bacteria	FMGS01000004.1	SCJ32730.1	E	E-1	SAMEA3545415_02354	>SAMEA3545415_02351(COG1032)	>SAMEA3545415_02352(COG5010)	>SAMEA3545415_02353(COG0280)	>SAMEA3545415_02354(COG1151)	>SAMEA3545415_02355(COG3640)	>SAMEA3545415_02356(COG2759)	>SAMEA3545415_02357(COG3404)	>SAMEA3545415_02358(COG0190)	>SAMEA3545415_02359	>SAMEA3545415_02360(COG0685)	>SAMEA3545415_02361(COG1249)	>SAMEA3545415_02362(COG3640)	>SAMEA3545415_02363(COG2069)	>SAMEA3545415_02364(COG1456)	>SAMEA3545415_02365(COG1410)	>SAMEA3545415_02366(COG1614)	>SAMEA3545415_02367(COG0509)	>SAMEA3545415_02368(COG3894)	>SAMEA3545415_02369(COG1856)
GCA_900066965.1_14207_7_81_genomic.gff	MAG	765821	uncultured Blautia sp.	uncultured Blautia sp.	Blautia	Lachnospiraceae	Clostridiales	Clostridia	Firmicutes	Bacteria	FMGU01000015.1	SCJ85309.1	E	E-1	SAMEA3545421_02485	<SAMEA3545421_02470(COG4624)	<SAMEA3545421_02471(COG1894)	<SAMEA3545421_02472(COG1905)	<SAMEA3545421_02473(COG2896)	<SAMEA3545421_02474(COG2258)	<SAMEA3545421_02475(COG0190)	<SAMEA3545421_02476(COG3404)	<SAMEA3545421_02477(COG2759)	<SAMEA3545421_02478	<SAMEA3545421_02479(COG3894)	<SAMEA3545421_02480(COG1410)	<SAMEA3545421_02481(COG1456)	<SAMEA3545421_02482(COG2069)	<SAMEA3545421_02483(COG1614)	<SAMEA3545421_02484(COG3640)	<SAMEA3545421_02485(COG1151)	<SAMEA3545421_02486(COG3640)	<SAMEA3545421_02487(COG0685)	<SAMEA3545421_02488	<SAMEA3545421_02489
GCA_900066975.1_14207_7_87_genomic.gff	MAG	165185	uncultured Eubacterium sp.	uncultured Eubacterium sp.	Eubacterium	Eubacteriaceae	Clostridiales	Clostridia	Firmicutes	Bacteria	FMGW01000002.1	SCI93619.1	C	C-4	SAMEA3545427_00332	>SAMEA3545427_00332(COG1151)	>SAMEA3545427_00333(COG4624)
GCA_900079715.1_APW_PRJEB13531_v1_genomic.gff	MAG	167968	uncultured Desulfovibrio sp.	uncultured Desulfovibrio sp.	Desulfovibrio	Desulfovibrionaceae	Desulfovibrionales	Deltaproteobacteria	Proteobacteria	Bacteria	LT598928.1	SBW11422.1	E	E-2	KM92DES2_20065	>KM92DES2_20064(COG0664)	>KM92DES2_20065(COG1151)	>KM92DES2_20066(COG3640)
GCA_900095405.1_APW_KL86PLE1_v1_genomic.gff	MAG	307249	uncultured Sporomusa sp.	uncultured Sporomusa sp.	Sporomusa	Sporomusaceae	Selenomonadales	Negativicutes	Firmicutes	Bacteria	LT608335.1	SCM80802.1	F	F-1	KL86SPO_30980	<KL86SPO_30965(COG4624)	<KL86SPO_30966(COG1894)	<KL86SPO_30967(COG1905)	<KL86SPO_30968(COG0685)	<KL86SPO_30969	<KL86SPO_30970(COG1908)	<KL86SPO_30971(COG1148)	<KL86SPO_30972(COG2048)	<KL86SPO_30973(COG1150)	<KL86SPO_30974(COG1410)	<KL86SPO_30975(COG2069)	<KL86SPO_30976(COG3640)	<KL86SPO_30977(COG3894)	<KL86SPO_30978(COG1456)	<KL86SPO_30979(COG1614)	<KL86SPO_30980(COG1151)	<KL86SPO_30981(COG2759)	<KL86SPO_30982(COG3640)	<KL86SPO_30983	<KL86SPO_30984(COG0190)	<KL86SPO_30985(COG3404)
GCA_900095405.1_APW_KL86PLE1_v1_genomic.gff	MAG	307249	uncultured Sporomusa sp.	uncultured Sporomusa sp.	Sporomusa	Sporomusaceae	Selenomonadales	Negativicutes	Firmicutes	Bacteria	LT608335.1	SCM81156.1	D	D-2	KL86SPO_31335	<KL86SPO_31334(COG1284)	<KL86SPO_31335(COG1151)
GCA_900095405.1_APW_KL86PLE1_v1_genomic.gff	MAG	307249	uncultured Sporomusa sp.	uncultured Sporomusa sp.	Sporomusa	Sporomusaceae	Selenomonadales	Negativicutes	Firmicutes	Bacteria	LT608335.1	SCM81423.1	B	B-2	KL86SPO_31602	<KL86SPO_31598(COG1606)	<KL86SPO_31599(COG1116)	<KL86SPO_31600(COG0600)	<KL86SPO_31601(COG0715)	<KL86SPO_31602(COG1151)	<KL86SPO_31603	<KL86SPO_31604(COG0666)	<KL86SPO_31605	<KL86SPO_31606(COG1132)	<KL86SPO_31607(COG1132)	<KL86SPO_31608(COG1122)	<KL86SPO_31609(COG0619)	<KL86SPO_31610	<KL86SPO_31611(COG4206)	>KL86SPO_31612(COG2207)	<KL86SPO_31613(COG1132)	<KL86SPO_31614(COG0534)
GCA_900095415.1_APW_KL86PLE_v1_genomic.gff	MAG	442121	uncultured Pleomorphomonas sp.	uncultured Pleomorphomonas sp.	Pleomorphomonas	Methylocystaceae	Rhizobiales	Alphaproteobacteria	Proteobacteria	Bacteria	LT608334.1	SCM76165.1	F	F-2	KL86PLE_30612	>KL86PLE_30611(COG1142)	>KL86PLE_30612(COG1151)	>KL86PLE_30613(COG3640)	>KL86PLE_30614	>KL86PLE_30615	>KL86PLE_30616(COG0664)
GCA_900115765.1_IMG-taxon_2693429901_annotated_assembly_genomic.gff	-	937334	Caldicoprobacter faecalis	Caldicoprobacter faecalis	Caldicoprobacter	Caldicoprobacteraceae	Clostridiales	Clostridia	Firmicutes	Bacteria	FOXR01000009.1	SFQ00556.1	B	B-2	SAMN05444406_10925	<SAMN05444406_10919(COG0534)	>SAMN05444406_10920(COG1606)	>SAMN05444406_10921(COG0251)	>SAMN05444406_10922(COG0626)	>SAMN05444406_10923(COG0626)	>SAMN05444406_10924	>SAMN05444406_10925(COG1151)	>SAMN05444406_10926(COG0715)	>SAMN05444406_10927(COG0715)	>SAMN05444406_10928(COG0600)	>SAMN05444406_10929(COG1116)
GCA_900142145.1_IMG-taxon_2585428170_annotated_assembly_genomic.gff	-	1121919	Geosporobacter subterraneus DSM 17957	Geosporobacter subterraneus	Geosporobacter	Clostridiaceae	Clostridiales	Clostridia	Firmicutes	Bacteria	FQZV01000006.1	SHI73919.1	D	D-2	SAMN02745975_00494	>SAMN02745975_00494(COG1151)
GCA_900142145.1_IMG-taxon_2585428170_annotated_assembly_genomic.gff	-	1121919	Geosporobacter subterraneus DSM 17957	Geosporobacter subterraneus	Geosporobacter	Clostridiaceae	Clostridiales	Clostridia	Firmicutes	Bacteria	FQZV01000014.1	SHJ09141.1	E	E-1	SAMN02745975_01261	>SAMN02745975_01261(COG1151)	>SAMN02745975_01262(COG3640)	>SAMN02745975_01263(COG2759)	>SAMN02745975_01264(COG3404)	>SAMN02745975_01265(COG0190)	>SAMN02745975_01266	>SAMN02745975_01267(COG0685)	>SAMN02745975_01268(COG1249)	>SAMN02745975_01269(COG3640)	>SAMN02745975_01270(COG2069)	>SAMN02745975_01271(COG1456)	>SAMN02745975_01272(COG1410)	>SAMN02745975_01273(COG1614)	>SAMN02745975_01274(COG0509)	>SAMN02745975_01275(COG3894)	>SAMN02745975_01276
GCF_000006175.1_ASM617v2_genomic.gff	-	456320	Methanococcus voltae A3	Methanococcus voltae	Methanococcus	Methanococcaceae	Methanococcales	Methanococci	Euryarchaeota	Archaea	NC_014222.1	WP_013179588.1	D	D-1	MVOL_RS01020	>MVOL_RS01015(COG1364)	>MVOL_RS01020(COG1151)	>MVOL_RS01025
GCF_000007065.1_ASM706v1_genomic.gff	-	192952	Methanosarcina mazei Go1	Methanosarcina mazei	Methanosarcina	Methanosarcinaceae	Methanosarcinales	Methanomicrobia	Euryarchaeota	Archaea	NC_003901.1	WP_015410877.1	E	E-1	MM_RS00615	>MM_RS00615(COG1151)	>MM_RS00620(COG1142)
GCF_000007065.1_ASM706v1_genomic.gff	-	192952	Methanosarcina mazei Go1	Methanosarcina mazei	Methanosarcina	Methanosarcinaceae	Methanosarcinales	Methanomicrobia	Euryarchaeota	Archaea	NC_003901.1	WP_011032635.1	A	A-1	MM_RS03570	>MM_RS03570(COG1152)	>MM_RS03575(COG1880)	>MM_RS03580(COG1614)	>MM_RS03585(COG3640)	>MM_RS03590(COG2069)	>MM_RS03595(COG1456)
GCF_000007065.1_ASM706v1_genomic.gff	-	192952	Methanosarcina mazei Go1	Methanosarcina mazei	Methanosarcina	Methanosarcinaceae	Methanosarcinales	Methanomicrobia	Euryarchaeota	Archaea	NC_003901.1	WP_011034020.1	A	A-1	MM_RS10830	<MM_RS10805(COG1456)	<MM_RS10810(COG2069)	<MM_RS10815(COG3640)	<MM_RS10820(COG1614)	<MM_RS10825(COG1880)	<MM_RS10830(COG1152)
GCF_000007065.1_ASM706v1_genomic.gff	-	192952	Methanosarcina mazei Go1	Methanosarcina mazei	Methanosarcina	Methanosarcinaceae	Methanosarcinales	Methanomicrobia	Euryarchaeota	Archaea	NC_003901.1	WP_011034226.1	D	D-1	MM_RS11930	<MM_RS17905	<MM_RS11930(COG1151)
GCF_000007085.1_ASM708v1_genomic.gff	-	273068	Caldanaerobacter subterraneus subsp. tengcongensis MB4	Caldanaerobacter subterraneus	Caldanaerobacter	Thermoanaerobacteraceae	Thermoanaerobacterales	Clostridia	Firmicutes	Bacteria	NC_003869.1	WP_011025912.1	F	F-2	TTE_RS08175	<TTE_RS08095(COG0292)	<TTE_RS08100(COG0291)	<TTE_RS08105(COG0290)	<TTE_RS08115	<TTE_RS08120(COG0680)	<TTE_RS08125	<TTE_RS08130(COG3260)	<TTE_RS08135(COG1143)	<TTE_RS08140(COG3261)	<TTE_RS08145(COG1009)	<TTE_RS08150(COG0651)	<TTE_RS08155(COG4237)	<TTE_RS08160(COG0650)	<TTE_RS08165(COG0651)	<TTE_RS08170(COG1142)	<TTE_RS08175(COG1151)	<TTE_RS08180(COG3640)
GCF_000007345.1_ASM734v1_genomic.gff	-	188937	Methanosarcina acetivorans C2A	Methanosarcina acetivorans	Methanosarcina	Methanosarcinaceae	Methanosarcinales	Methanomicrobia	Euryarchaeota	Archaea	NC_003552.1	WP_011021051.1	A	A-1	MA_RS05310	<MA_RS05285(COG1456)	<MA_RS05290(COG2069)	<MA_RS05295(COG3640)	<MA_RS05300(COG1614)	<MA_RS05305(COG1880)	<MA_RS05310(COG1152)
GCF_000007345.1_ASM734v1_genomic.gff	-	188937	Methanosarcina acetivorans C2A	Methanosarcina acetivorans	Methanosarcina	Methanosarcinaceae	Methanosarcinales	Methanomicrobia	Euryarchaeota	Archaea	NC_003552.1	WP_011021329.1	D	D-1	MA_RS06785	<MA_RS06785(COG1151)
GCF_000007345.1_ASM734v1_genomic.gff	-	188937	Methanosarcina acetivorans C2A	Methanosarcina acetivorans	Methanosarcina	Methanosarcinaceae	Methanosarcinales	Methanomicrobia	Euryarchaeota	Archaea	NC_003552.1	WP_048066467.1	E	E-1	MA_RS17125	>MA_RS17125(COG1151)	>MA_RS17130(COG1142)
GCF_000007345.1_ASM734v1_genomic.gff	-	188937	Methanosarcina acetivorans C2A	Methanosarcina acetivorans	Methanosarcina	Methanosarcinaceae	Methanosarcinales	Methanomicrobia	Euryarchaeota	Archaea	NC_003552.1	WP_011023758.1	A	A-1	MA_RS20135	>MA_RS20135(COG1152)	>MA_RS20140(COG1880)	>MA_RS20145(COG1614)	>MA_RS20150(COG3640)	>MA_RS20155(COG2069)	>MA_RS20160(COG1456)
GCF_000007345.1_ASM734v1_genomic.gff	-	188937	Methanosarcina acetivorans C2A	Methanosarcina acetivorans	Methanosarcina	Methanosarcinaceae	Methanosarcinales	Methanomicrobia	Euryarchaeota	Archaea	NC_003552.1	WP_011024278.1	A	A-1	MA_RS22995	<MA_RS22995(COG1152)
GCF_000007625.1_ASM762v1_genomic.gff	-	212717	Clostridium tetani E88	Clostridium tetani	Clostridium	Clostridiaceae	Clostridiales	Clostridia	Firmicutes	Bacteria	NC_004557.1	WP_011099392.1	D	D-2	CTC_RS05890	>CTC_RS05885(COG0840)	<CTC_RS05890(COG1151)
GCF_000007985.2_ASM798v2_genomic.gff	-	243231	Geobacter sulfurreducens PCA	Geobacter sulfurreducens	Geobacter	Geobacteraceae	Desulfuromonadales	Deltaproteobacteria	Proteobacteria	Bacteria	NC_002939.5	WP_010942742.1	E	E-1	GSU2098	<GSU2092(COG4681)	<GSU2093(COG0488)	<GSU2094(COG3437)	<GSU3550	<GSU3551	<GSU2095(COG1251)	<GSU2096(COG0437)	<GSU2097(COG3640)	<GSU2098(COG1151)	<GSU2099(COG3279)
GCF_000008645.1_ASM864v1_genomic.gff	-	187420	Methanothermobacter thermautotrophicus str. Delta H	Methanothermobacter thermautotrophicus	Methanothermobacter	Methanobacteriaceae	Methanobacteriales	Methanobacteria	Euryarchaeota	Archaea	NC_000916.1	WP_010877316.1	A	A-1	MTH_RS08185	>MTH_RS08185(COG1152)	>MTH_RS08190(COG1880)	>MTH_RS08195(COG1614)	>MTH_RS08200(COG3640)	>MTH_RS08205(COG2069)	>MTH_RS08210(COG1456)	>MTH_RS08215(COG1142)
GCF_000008665.1_ASM866v1_genomic.gff	-	224325	Archaeoglobus fulgidus DSM 4304	Archaeoglobus fulgidus	Archaeoglobus	Archaeoglobaceae	Archaeoglobales	Archaeoglobi	Euryarchaeota	Archaea	NC_000917.1	WP_010878596.1	A	A-2	AF_RS05560	>AF_RS05560(COG1152)	>AF_RS05565(COG1880)	>AF_RS05570	>AF_RS05575(COG2410)	>AF_RS05580(COG1578)	>AF_RS05585(COG2158)	>AF_RS05590(COG2136)
GCF_000008665.1_ASM866v1_genomic.gff	-	224325	Archaeoglobus fulgidus DSM 4304	Archaeoglobus fulgidus	Archaeoglobus	Archaeoglobaceae	Archaeoglobales	Archaeoglobi	Euryarchaeota	Archaea	NC_000917.1	WP_010879343.1	D	D-1	AF_RS09300	>AF_RS09300(COG1151)	>AF_RS09305(COG0491)	>AF_RS09310(COG0247)
GCF_000008665.1_ASM866v1_genomic.gff	-	224325	Archaeoglobus fulgidus DSM 4304	Archaeoglobus fulgidus	Archaeoglobus	Archaeoglobaceae	Archaeoglobales	Archaeoglobi	Euryarchaeota	Archaea	NC_000917.1	WP_010879884.1	A	A-1	AF_RS12090	>AF_RS12090(COG1152)	>AF_RS12095(COG1880)	>AF_RS12100(COG0566)	>AF_RS12105(COG1305)	>AF_RS12110	>AF_RS12115(COG1243)
GCF_000008765.1_ASM876v1_genomic.gff	-	272562	Clostridium acetobutylicum ATCC 824	Clostridium acetobutylicum	Clostridium	Clostridiaceae	Clostridiales	Clostridia	Firmicutes	Bacteria	NC_003030.1	WP_010963443.1	C	C-1	CA_C0116	>CA_C0111(COG0765)	>CA_C0112(COG1126)	>CA_C0113(COG1349)	>CA_C0114	>CA_C0115(COG1959)	>CA_C0116(COG1151)	>CA_C0117(COG2204)	>CA_C0118(COG0643)	>CA_C0119(COG0835)	>CA_C0120(COG0840)	>CA_C0121(COG1352)	>CA_C0122(COG0784)	>CA_C0123(COG0590)
GCF_000008765.1_ASM876v1_genomic.gff	-	272562	Clostridium acetobutylicum ATCC 824	Clostridium acetobutylicum	Clostridium	Clostridiaceae	Clostridiales	Clostridia	Firmicutes	Bacteria	NC_003030.1	WP_010965793.1	D	D-1	CA_C2498	>CA_C2498(COG1151)	>CA_C2499(COG0674)
GCF_000009205.1_ASM920v1_genomic.gff	-	272563	Clostridioides difficile 630	Clostridioides difficile	Clostridioides	Peptostreptococcaceae	Clostridiales	Clostridia	Firmicutes	Bacteria	NC_009089.1	WP_009888019.1	C	C-1	CD630_01740	<CD630_01721(COG1143)	>CD630_01730(COG2843)	>CD630_01740(COG1151)	>CD630_01750(COG0437)	>CD630_01760(COG1251)
GCF_000009205.1_ASM920v1_genomic.gff	-	272563	Clostridioides difficile 630	Clostridioides difficile	Clostridioides	Peptostreptococcaceae	Clostridiales	Clostridia	Firmicutes	Bacteria	NC_009089.1	WP_011860935.1	E	E-1	CD630_07160	>CD630_07150(COG0280)	>CD630_07160(COG1151)	>CD630_07170(COG3640)	>CD630_07180(COG2759)	>CD630_07190(COG3404)	>CD630_07200(COG0190)
GCF_000010045.1_ASM1004v1_genomic.gff	-	138119	Desulfitobacterium hafniense Y51	Desulfitobacterium hafniense	Desulfitobacterium	Peptococcaceae	Clostridiales	Clostridia	Firmicutes	Bacteria	NC_007907.1	WP_011459810.1	F	F-1	DSY_RS08790	<DSY_RS08760(COG1410)	<DSY_RS08765(COG2069)	<DSY_RS08770(COG3640)	<DSY_RS08775(COG3894)	<DSY_RS08780(COG1456)	<DSY_RS08785(COG1614)	<DSY_RS08790(COG1151)	<DSY_RS08795(COG3640)
GCF_000010045.1_ASM1004v1_genomic.gff	-	138119	Desulfitobacterium hafniense Y51	Desulfitobacterium hafniense	Desulfitobacterium	Peptococcaceae	Clostridiales	Clostridia	Firmicutes	Bacteria	NC_007907.1	WP_011460476.1	F	F-1	DSY_RS14110	>DSY_RS14095	>DSY_RS14100(COG0664)	>DSY_RS14105(COG1142)	>DSY_RS14110(COG1151)	>DSY_RS14115(COG3640)
GCF_000010045.1_ASM1004v1_genomic.gff	-	138119	Desulfitobacterium hafniense Y51	Desulfitobacterium hafniense	Desulfitobacterium	Peptococcaceae	Clostridiales	Clostridia	Firmicutes	Bacteria	NC_007907.1	WP_041272626.1	D	D-1	DSY_RS22145	<DSY_RS22135	<DSY_RS27695	<DSY_RS22140(COG0664)	<DSY_RS22145(COG1151)
GCF_000010045.1_ASM1004v1_genomic.gff	-	138119	Desulfitobacterium hafniense Y51	Desulfitobacterium hafniense	Desulfitobacterium	Peptococcaceae	Clostridiales	Clostridia	Firmicutes	Bacteria	NC_007907.1	WP_041272665.1	F	F-1	DSY_RS23595	>DSY_RS23560(COG0438)	<DSY_RS23565(COG0463)	<DSY_RS23570	<DSY_RS23575	<DSY_RS23580(COG1208)	<DSY_RS23585(COG0451)	<DSY_RS23590(COG1251)	<DSY_RS23595(COG1151)	<DSY_RS23600(COG1142)	<DSY_RS23605(COG0664)	<DSY_RS23610(COG1116)	<DSY_RS23615(COG0715)	<DSY_RS23620(COG0600)	<DSY_RS23625(COG0011)	<DSY_RS23630(COG1512)	<DSY_RS23635(COG1704)	<DSY_RS23640	<DSY_RS23645(COG3585)	<DSY_RS23650
GCF_000010665.1_ASM1066v1_genomic.gff	-	573370	Desulfovibrio magneticus RS-1	Desulfovibrio magneticus	Desulfovibrio	Desulfovibrionaceae	Desulfovibrionales	Deltaproteobacteria	Proteobacteria	Bacteria	NC_012796.1	WP_015861246.1	E	E-2	DMR_RS12320	>DMR_RS12305(COG0745)	>DMR_RS12310(COG2206)	>DMR_RS12315(COG0664)	>DMR_RS12320(COG1151)	>DMR_RS12325(COG3640)
GCF_000011585.1_ASM1158v1_genomic.gff	-	267377	Methanococcus maripaludis S2	Methanococcus maripaludis	Methanococcus	Methanococcaceae	Methanococcales	Methanococci	Euryarchaeota	Archaea	NC_005791.1	WP_011170929.1	A	A-1	MMP_RS05100	>MMP_RS05055(COG1810)	>MMP_RS05060(COG3640)	<MMP_RS05065(COG1532)	<MMP_RS05070(COG1142)	<MMP_RS05075(COG1456)	<MMP_RS05080(COG2069)	<MMP_RS05085(COG3640)	<MMP_RS05090(COG1614)	<MMP_RS05095(COG1880)	<MMP_RS05100(COG1152)	<MMP_RS05105(COG1810)	<MMP_RS05110(COG0030)	<MMP_RS05115(COG2520)	<MMP_RS05120(COG1389)
GCF_000012665.1_ASM1266v1_genomic.gff	-	207559	Desulfovibrio alaskensis G20	Desulfovibrio alaskensis	Desulfovibrio	Desulfovibrionaceae	Desulfovibrionales	Deltaproteobacteria	Proteobacteria	Bacteria	NC_007519.1	WP_011368794.1	E	E-2	DDE_RS13910	>DDE_RS13900	>DDE_RS13905(COG0664)	>DDE_RS13910(COG1151)	>DDE_RS13915(COG3640)	>DDE_RS13920	>DDE_RS13925	>DDE_RS13930	>DDE_RS13935	>DDE_RS13940(COG1473)	>DDE_RS13945(COG1760)
GCF_000012865.1_ASM1286v1_genomic.gff	-	246194	Carboxydothermus hydrogenoformans Z-2901	Carboxydothermus hydrogenoformans	Carboxydothermus	Thermoanaerobacteraceae	Thermoanaerobacterales	Clostridia	Firmicutes	Bacteria	NC_007503.1	WP_011342982.1	D	D-1	CHY_RS00160	<CHY_RS00145(COG0012)	<CHY_RS00150(COG4481)	<CHY_RS00155(COG0668)	<CHY_RS00160(COG1151)
GCF_000012865.1_ASM1286v1_genomic.gff	-	246194	Carboxydothermus hydrogenoformans Z-2901	Carboxydothermus hydrogenoformans	Carboxydothermus	Thermoanaerobacteraceae	Thermoanaerobacterales	Clostridia	Firmicutes	Bacteria	NC_007503.1	WP_011343033.1	F	F-1	CHY_RS00395	<CHY_RS12515(COG0664)	<CHY_RS00395(COG1151)	<CHY_RS00400(COG1142)
GCF_000012865.1_ASM1286v1_genomic.gff	-	246194	Carboxydothermus hydrogenoformans Z-2901	Carboxydothermus hydrogenoformans	Carboxydothermus	Thermoanaerobacteraceae	Thermoanaerobacterales	Clostridia	Firmicutes	Bacteria	NC_007503.1	WP_011343666.1	F	F-1	CHY_RS03340	>CHY_RS03290(COG0535)	>CHY_RS03295(COG1541)	>CHY_RS03300(COG4747)	>CHY_RS03305(COG0212)	>CHY_RS03310(COG1905)	>CHY_RS03315(COG1894)	>CHY_RS12970(COG3383)	>CHY_RS03330(COG1942)	>CHY_RS03335(COG1142)	>CHY_RS03340(COG1151)	>CHY_RS03345(COG1251)	>CHY_RS03350(COG1592)	>CHY_RS03355(COG3634)	>CHY_RS12975	>CHY_RS03360	>CHY_RS03365(COG1739)	>CHY_RS03370(COG2105)
GCF_000012865.1_ASM1286v1_genomic.gff	-	246194	Carboxydothermus hydrogenoformans Z-2901	Carboxydothermus hydrogenoformans	Carboxydothermus	Thermoanaerobacteraceae	Thermoanaerobacterales	Clostridia	Firmicutes	Bacteria	NC_007503.1	WP_011344718.1	F	F-1	CHY_RS08505	<CHY_RS08505(COG1151)	<CHY_RS08510(COG1142)	<CHY_RS08515(COG0375)	<CHY_RS08520(COG3261)	<CHY_RS08525(COG3262)	<CHY_RS08530(COG1143)	<CHY_RS08535(COG3260)	<CHY_RS08540(COG0650)	<CHY_RS08545(COG0651)	<CHY_RS08550(COG3640)	<CHY_RS08555(COG0664)	<CHY_RS08560(COG0247)	<CHY_RS08565(COG3075)	<CHY_RS08570(COG0578)	<CHY_RS08575(COG0554)	<CHY_RS08580(COG0580)
GCF_000012885.1_ASM1288v1_genomic.gff	-	338963	Pelobacter carbinolicus DSM 2380	Pelobacter carbinolicus	Pelobacter	Desulfuromonadaceae	Desulfuromonadales	Deltaproteobacteria	Proteobacteria	Bacteria	NC_007498.2	WP_011339705.1	E	E-1	PCAR_RS00850	>PCAR_RS00835	>PCAR_RS00840(COG3279)	>PCAR_RS00845	>PCAR_RS00850(COG1151)	>PCAR_RS00855(COG3640)	>PCAR_RS00860(COG0437)	>PCAR_RS00865	>PCAR_RS00870(COG0310)	>PCAR_RS00875(COG0475)
GCF_000012885.1_ASM1288v1_genomic.gff	-	338963	Pelobacter carbinolicus DSM 2380	Pelobacter carbinolicus	Pelobacter	Desulfuromonadaceae	Desulfuromonadales	Deltaproteobacteria	Proteobacteria	Bacteria	NC_007498.2	WP_011340609.1	C	C-1	PCAR_RS05255	>PCAR_RS05240(COG0463)	<PCAR_RS05245(COG1251)	<PCAR_RS05250(COG0437)	<PCAR_RS05255(COG1151)	<PCAR_RS05260(COG1959)
GCF_000012925.1_ASM1292v1_genomic.gff	-	269799	Geobacter metallireducens GS-15	Geobacter metallireducens	Geobacter	Geobacteraceae	Desulfuromonadales	Deltaproteobacteria	Proteobacteria	Bacteria	NC_007517.1	WP_004511942.1	B	B-3	GMET_RS09615	<GMET_RS09600(COG1116)	<GMET_RS09605(COG0600)	<GMET_RS09610(COG0715)	<GMET_RS09615(COG1151)	<GMET_RS18350(COG5583)	<GMET_RS09620(COG1118)	<GMET_RS09625(COG4208)	<GMET_RS09630(COG0555)	<GMET_RS09635(COG1613)	<GMET_RS09640(COG1959)
GCF_000013085.1_ASM1308v1_genomic.gff	-	269796	Rhodospirillum rubrum ATCC 11170	Rhodospirillum rubrum	Rhodospirillum	Rhodospirillaceae	Rhodospirillales	Alphaproteobacteria	Proteobacteria	Bacteria	NC_007643.1	WP_011389181.1	F	F-2	Rru_A1427	>Rru_A1420(COG0651)	>Rru_A1421(COG0650)	>Rru_A1422(COG3260)	>Rru_A1423(COG1143)	>Rru_A1424(COG0852)	>Rru_A1425(COG3261)	>Rru_A1426(COG1142)	>Rru_A1427(COG1151)	>Rru_A1428(COG3640)	>Rru_A1429	>Rru_A1430	>Rru_A1431(COG0664)
GCF_000013105.1_ASM1310v1_genomic.gff	-	264732	Moorella thermoacetica ATCC 39073	Moorella thermoacetica	Moorella	Thermoanaerobacteraceae	Thermoanaerobacterales	Clostridia	Firmicutes	Bacteria	NC_007644.1	WP_011392717.1	F	F-1	Moth_1203	<Moth_1193(COG1908)	<Moth_1194(COG0493)	<Moth_1195(COG2048)	<Moth_1196(COG1150)	<Moth_1197(COG1410)	<Moth_1198(COG2069)	<Moth_1199(COG3640)	<Moth_1200(COG3894)	<Moth_1201(COG1456)	<Moth_1202(COG1614)	<Moth_1203(COG1151)	<Moth_1204(COG3640)	>Moth_1205(COG2207)
GCF_000013105.1_ASM1310v1_genomic.gff	-	264732	Moorella thermoacetica ATCC 39073	Moorella thermoacetica	Moorella	Thermoanaerobacteraceae	Thermoanaerobacterales	Clostridia	Firmicutes	Bacteria	NC_007644.1	WP_011393470.1	B	B-4	Moth_1972	>Moth_1971(COG0031)	>Moth_1972(COG1151)	>Moth_1973(COG0715)	>Moth_1974(COG0600)	>Moth_1975(COG1116)	>Moth_1976
GCF_000013445.1_ASM1344v1_genomic.gff	-	323259	Methanospirillum hungatei JF-1	Methanospirillum hungatei	Methanospirillum	Methanospirillaceae	Methanomicrobiales	Methanomicrobia	Euryarchaeota	Archaea	NC_007796.1	WP_011447726.1	A	A-1	MHUN_RS03625	<MHUN_RS03600(COG3894)	<MHUN_RS03605(COG1456)	<MHUN_RS03610(COG2069)	<MHUN_RS03615(COG1614)	<MHUN_RS03620(COG1880)	<MHUN_RS03625(COG1152)	<MHUN_RS03630(COG3640)	<MHUN_RS03635(COG3640)	<MHUN_RS03640	<MHUN_RS03645
GCF_000013445.1_ASM1344v1_genomic.gff	-	323259	Methanospirillum hungatei JF-1	Methanospirillum hungatei	Methanospirillum	Methanospirillaceae	Methanomicrobiales	Methanomicrobia	Euryarchaeota	Archaea	NC_007796.1	WP_011448292.1	E	E-1	MHUN_RS06690	>MHUN_RS06680(COG2015)	>MHUN_RS06685(COG0437)	>MHUN_RS06690(COG1151)	>MHUN_RS06695(COG1905)	>MHUN_RS06700(COG1894)	>MHUN_RS06705(COG1034)	>MHUN_RS06710(COG3640)	>MHUN_RS18215
GCF_000013725.1_ASM1372v1_genomic.gff	-	259564	Methanococcoides burtonii DSM 6242	Methanococcoides burtonii	Methanococcoides	Methanosarcinaceae	Methanosarcinales	Methanomicrobia	Euryarchaeota	Archaea	NC_007955.1	WP_011498962.1	A	A-1	MBUR_RS04415	>MBUR_RS04415(COG1152)	>MBUR_RS04420(COG1880)	>MBUR_RS04425(COG1614)	>MBUR_RS04430(COG3640)	>MBUR_RS04435(COG2069)	>MBUR_RS04440(COG1456)	>MBUR_RS04445(COG1073)
GCF_000013745.1_ASM1374v1_genomic.gff	-	316056	Rhodopseudomonas palustris BisB18	Rhodopseudomonas palustris	Rhodopseudomonas	Bradyrhizobiaceae	Rhizobiales	Alphaproteobacteria	Proteobacteria	Bacteria	NC_007925.1	WP_011474899.1	F	F-2	RPC_RS22540	<RPC_RS22515(COG0378)	<RPC_RS22520(COG0664)	<RPC_RS25185	<RPC_RS22530	<RPC_RS22535(COG3640)	<RPC_RS22540(COG1151)	<RPC_RS22545(COG1142)	<RPC_RS22550(COG0375)	<RPC_RS22555(COG3261)	<RPC_RS22560(COG0852)	<RPC_RS22565(COG1143)	<RPC_RS22570(COG3260)	<RPC_RS22575(COG0650)	<RPC_RS22580(COG0651)
GCF_000014125.1_ASM1412v1_genomic.gff	-	386415	Clostridium novyi NT	Clostridium novyi	Clostridium	Clostridiaceae	Clostridiales	Clostridia	Firmicutes	Bacteria	NC_008593.1	WP_011723114.1	C	C-1	NT01CX_RS10965	>NT01CX_RS10960(COG1959)	>NT01CX_RS10965(COG1151)
GCF_000014965.1_ASM1496v1_genomic.gff	-	335543	Syntrophobacter fumaroxidans MPOB	Syntrophobacter fumaroxidans	Syntrophobacter	Syntrophobacteraceae	Syntrophobacterales	Deltaproteobacteria	Proteobacteria	Bacteria	NC_008554.1	WP_011699412.1	E	E-1	SFUM_RS13290	<SFUM_RS13270(COG1410)	<SFUM_RS13275	<SFUM_RS13280(COG1456)	<SFUM_RS13285(COG1614)	<SFUM_RS13290(COG1151)	<SFUM_RS13295(COG2069)	<SFUM_RS13300	<SFUM_RS21865(COG0790)
GCF_000014965.1_ASM1496v1_genomic.gff	-	335543	Syntrophobacter fumaroxidans MPOB	Syntrophobacter fumaroxidans	Syntrophobacter	Syntrophobacteraceae	Syntrophobacterales	Deltaproteobacteria	Proteobacteria	Bacteria	NC_008554.1	WP_011699717.1	E	E-2	SFUM_RS14930	>SFUM_RS21930	>SFUM_RS14920(COG1251)	>SFUM_RS14925(COG0437)	>SFUM_RS14930(COG1151)
GCF_000015125.1_ASM1512v1_genomic.gff	-	290317	Chlorobium phaeobacteroides DSM 266	Chlorobium phaeobacteroides	Chlorobium	Chlorobiaceae	Chlorobiales	Chlorobia	Chlorobi	Bacteria	NC_008639.1	WP_049751718.1	B	B-2	CPHA266_RS00790	>CPHA266_RS00760(COG3640)	>CPHA266_RS00765(COG0715)	>CPHA266_RS00770(COG0600)	>CPHA266_RS00775(COG1116)	>CPHA266_RS00780(COG1116)	>CPHA266_RS00785	>CPHA266_RS00790(COG1151)	>CPHA266_RS00795
GCF_000015485.1_ASM1548v1_genomic.gff	-	391774	Desulfovibrio vulgaris DP4	Desulfovibrio vulgaris	Desulfovibrio	Desulfovibrionaceae	Desulfovibrionales	Deltaproteobacteria	Proteobacteria	Bacteria	NC_008751.1	WP_011792086.1	E	E-2	DVUL_RS05880	<DVUL_RS05875(COG3640)	<DVUL_RS05880(COG1151)	<DVUL_RS05885(COG0664)
GCF_000015865.1_ASM1586v1_genomic.gff	-	203119	Ruminiclostridium thermocellum ATCC 27405	Ruminiclostridium thermocellum	Ruminiclostridium	Ruminococcaceae	Clostridiales	Clostridia	Firmicutes	Bacteria	NC_009012.1	WP_020457926.1	B	B-1	CTHE_RS14605	>CTHE_RS14530(COG3894)	>CTHE_RS14535(COG4887)	>CTHE_RS14540(COG0715)	>CTHE_RS14545(COG1116)	>CTHE_RS14550(COG0600)	>CTHE_RS14555(COG1541)	>CTHE_RS14560(COG0436)	>CTHE_RS14565(COG1014)	>CTHE_RS14570(COG1144)	>CTHE_RS14575(COG0674)	>CTHE_RS14580(COG1013)	>CTHE_RS14585	>CTHE_RS14590(COG0251)	>CTHE_RS14595(COG0626)	>CTHE_RS14600(COG1168)	>CTHE_RS14605(COG1151)	>CTHE_RS14610(COG0715)	>CTHE_RS14615(COG0600)	>CTHE_RS14620(COG1116)
GCF_000016125.1_ASM1612v1_genomic.gff	-	402880	Methanococcus maripaludis C5	Methanococcus maripaludis	Methanococcus	Methanococcaceae	Methanococcales	Methanococci	Euryarchaeota	Archaea	NC_009135.1	WP_011868569.1	A	A-1	MMARC5_RS04060	>MMARC5_RS04015(COG1810)	>MMARC5_RS04020(COG3640)	<MMARC5_RS04025(COG1532)	<MMARC5_RS04030(COG1142)	<MMARC5_RS04035(COG1456)	<MMARC5_RS04040(COG2069)	<MMARC5_RS04045(COG3640)	<MMARC5_RS04050(COG1614)	<MMARC5_RS04055(COG1880)	<MMARC5_RS04060(COG1152)	<MMARC5_RS04065(COG0030)	<MMARC5_RS04070(COG2264)	<MMARC5_RS04075(COG1389)
GCF_000016165.1_ASM1616v1_genomic.gff	-	349161	Desulfotomaculum reducens MI-1	Desulfotomaculum reducens	Desulfotomaculum	Peptococcaceae	Clostridiales	Clostridia	Firmicutes	Bacteria	NC_009253.1	WP_011877027.1	D	D-2	DRED_RS03515	>DRED_RS03490	>DRED_RS03495(COG0370)	>DRED_RS03500(COG1686)	>DRED_RS03505(COG0735)	>DRED_RS03510(COG2199)	>DRED_RS03515(COG1151)
GCF_000016505.1_ASM1650v1_genomic.gff	-	431943	Clostridium kluyveri DSM 555	Clostridium kluyveri	Clostridium	Clostridiaceae	Clostridiales	Clostridia	Firmicutes	Bacteria	NC_009706.1	WP_012102487.1	C	C-2	CKL_RS10530	>CKL_RS10530(COG1151)	>CKL_RS19860	>CKL_RS19545(COG0446)	>CKL_RS10540(COG1249)
GCF_000016545.1_ASM1654v1_genomic.gff	-	351627	Caldicellulosiruptor saccharolyticus DSM 8903	Caldicellulosiruptor saccharolyticus	Caldicellulosiruptor	Thermoanaerobacterales Family III. Incertae Sedis	Thermoanaerobacterales	Clostridia	Firmicutes	Bacteria	NC_009437.1	WP_011915993.1	C	C-1	CSAC_RS02010	>CSAC_RS01995(COG0673)	>CSAC_RS02000(COG0840)	>CSAC_RS02005(COG1959)	>CSAC_RS02010(COG1151)	>CSAC_RS02015(COG0437)	>CSAC_RS02020(COG1251)	>CSAC_RS02025(COG1846)	>CSAC_RS02030(COG1132)	>CSAC_RS02035(COG1132)	<CSAC_RS02040(COG2207)	>CSAC_RS02045(COG1454)
GCF_000016745.1_ASM1674v1_genomic.gff	-	351605	Geobacter uraniireducens Rf4	Geobacter uraniireducens	Geobacter	Geobacteraceae	Desulfuromonadales	Deltaproteobacteria	Proteobacteria	Bacteria	NC_009483.1	WP_011937555.1	E	E-1	GURA_RS03145	<GURA_RS03130(COG1251)	<GURA_RS03135(COG0437)	<GURA_RS03140(COG3640)	<GURA_RS03145(COG1151)
GCF_000016985.1_ASM1698v1_genomic.gff	-	293826	Alkaliphilus metalliredigens QYMF	Alkaliphilus metalliredigens	Alkaliphilus	Clostridiaceae	Clostridiales	Clostridia	Firmicutes	Bacteria	NC_009633.1	WP_012062426.1	D	D-2	AMET_RS05805	>AMET_RS05805(COG1151)
GCF_000016985.1_ASM1698v1_genomic.gff	-	293826	Alkaliphilus metalliredigens QYMF	Alkaliphilus metalliredigens	Alkaliphilus	Clostridiaceae	Clostridiales	Clostridia	Firmicutes	Bacteria	NC_009633.1	WP_012063158.1	E	E-1	AMET_RS09955	>AMET_RS09955(COG1151)	>AMET_RS09960(COG3640)	>AMET_RS09965(COG2759)	>AMET_RS09970(COG3404)	>AMET_RS09975(COG0190)	>AMET_RS09980	>AMET_RS09985(COG0685)	>AMET_RS09990(COG1249)	>AMET_RS09995(COG3640)	>AMET_RS10000(COG2069)	>AMET_RS10005(COG1456)	>AMET_RS10010(COG1410)	>AMET_RS10015(COG1614)	>AMET_RS10020(COG0509)	>AMET_RS10025(COG3894)	>AMET_RS10030
GCF_000016985.1_ASM1698v1_genomic.gff	-	293826	Alkaliphilus metalliredigens QYMF	Alkaliphilus metalliredigens	Alkaliphilus	Clostridiaceae	Clostridiales	Clostridia	Firmicutes	Bacteria	NC_009633.1	WP_012064843.1	F	F-2	AMET_RS18505	<AMET_RS18495(COG1131)	<AMET_RS18500(COG3640)	<AMET_RS18505(COG1151)	<AMET_RS18510(COG1142)	<AMET_RS18515(COG3829)	<AMET_RS18520(COG1164)	<AMET_RS18525(COG4728)	<AMET_RS18530(COG1199)	<AMET_RS18535	<AMET_RS18540(COG1120)	<AMET_RS18545(COG0609)	<AMET_RS18550(COG0609)	<AMET_RS18555(COG0614)	>AMET_RS18560(COG2207)
GCF_000017045.1_ASM1704v1_genomic.gff	-	441771	Clostridium botulinum A str. Hall	Clostridium botulinum	Clostridium	Clostridiaceae	Clostridiales	Clostridia	Firmicutes	Bacteria	NC_009698.1	WP_011948938.1	C	C-1	CLC_1369	>CLC_1365(COG0020)	>CLC_1367	>CLC_1368(COG1959)	>CLC_1369(COG1151)	>CLC_1370(COG0437)	>CLC_1371(COG1251)
GCF_000017165.1_ASM1716v1_genomic.gff	-	406327	Methanococcus vannielii SB	Methanococcus vannielii	Methanococcus	Methanococcaceae	Methanococcales	Methanococci	Euryarchaeota	Archaea	NC_009634.1	WP_011972123.1	A	A-1	MEVAN_RS01610	>MEVAN_RS01565(COG1810)	>MEVAN_RS01570(COG3640)	<MEVAN_RS01575(COG1532)	<MEVAN_RS01580(COG1142)	<MEVAN_RS01585(COG1456)	<MEVAN_RS01590(COG2069)	<MEVAN_RS01595(COG3640)	<MEVAN_RS01600(COG1614)	<MEVAN_RS01605(COG1880)	<MEVAN_RS01610(COG1152)	<MEVAN_RS01615(COG1810)	<MEVAN_RS01620(COG0030)	<MEVAN_RS01625(COG1867)	<MEVAN_RS01630(COG1389)
GCF_000017185.1_ASM1718v1_genomic.gff	-	419665	Methanococcus aeolicus Nankai-3	Methanococcus aeolicus	Methanococcus	Methanococcaceae	Methanococcales	Methanococci	Euryarchaeota	Archaea	NC_009635.1	WP_011973193.1	A	A-1	MAEO_RS02360	<MAEO_RS02355(COG1880)	>MAEO_RS02360(COG1152)
GCF_000017185.1_ASM1718v1_genomic.gff	-	419665	Methanococcus aeolicus Nankai-3	Methanococcus aeolicus	Methanococcus	Methanococcaceae	Methanococcales	Methanococci	Euryarchaeota	Archaea	NC_009635.1	WP_048062525.1	A	A-1	MAEO_RS05960	<MAEO_RS07815(COG1614)	<MAEO_RS05950(COG1142)	<MAEO_RS05955(COG1880)	<MAEO_RS05960(COG1152)
GCF_000017225.1_ASM1722v1_genomic.gff	-	426368	Methanococcus maripaludis C7	Methanococcus maripaludis	Methanococcus	Methanococcaceae	Methanococcales	Methanococci	Euryarchaeota	Archaea	NC_009637.1	WP_011976634.1	A	A-1	MMARC7_RS01145	>MMARC7_RS01100(COG1810)	>MMARC7_RS01105(COG3640)	<MMARC7_RS01110(COG1532)	<MMARC7_RS01115(COG1142)	<MMARC7_RS01120(COG1456)	<MMARC7_RS01125(COG2069)	<MMARC7_RS01130(COG3640)	<MMARC7_RS01135(COG1614)	<MMARC7_RS01140(COG1880)	<MMARC7_RS01145(COG1152)	<MMARC7_RS01150(COG0030)	<MMARC7_RS01155(COG2264)	<MMARC7_RS01160(COG1389)
GCF_000017465.2_ASM1746v2_genomic.gff	-	360105	Campylobacter curvus 525.92	Campylobacter curvus	Campylobacter	Campylobacteraceae	Campylobacterales	Epsilonproteobacteria	Proteobacteria	Bacteria	NC_009715.2	WP_011991642.1	B	B-2	CCV52592_RS00195	<CCV52592_RS00195(COG1151)	>CCV52592_RS00200(COG0715)	>CCV52592_RS00205(COG0600)	>CCV52592_RS00210(COG1116)
GCF_000017625.1_ASM1762v1_genomic.gff	-	456442	Methanoregula boonei 6A8	Methanoregula boonei	Methanoregula	Methanoregulaceae	Methanomicrobiales	Methanomicrobia	Euryarchaeota	Archaea	NC_009712.1	WP_012106426.1	E	E-2	MBOO_RS04650	>MBOO_RS04650(COG1151)	>MBOO_RS04655(COG3640)	>MBOO_RS04660(COG2816)	>MBOO_RS04665(COG1196)
GCF_000017625.1_ASM1762v1_genomic.gff	-	456442	Methanoregula boonei 6A8	Methanoregula boonei	Methanoregula	Methanoregulaceae	Methanomicrobiales	Methanomicrobia	Euryarchaeota	Archaea	NC_009712.1	WP_012106924.1	A	A-1	MBOO_RS07170	<MBOO_RS07145(COG3894)	<MBOO_RS07150(COG1456)	<MBOO_RS07155(COG2069)	<MBOO_RS07160(COG1614)	<MBOO_RS07165(COG1880)	<MBOO_RS07170(COG1152)	<MBOO_RS07175(COG3640)	<MBOO_RS07180(COG3640)
GCF_000017725.2_ASM1772v2_genomic.gff	-	360104	Campylobacter concisus 13826	Campylobacter concisus	Campylobacter	Campylobacteraceae	Campylobacterales	Epsilonproteobacteria	Proteobacteria	Bacteria	NC_009802.2	WP_012140339.1	B	B-2	CCC13826_RS08290	>CCC13826_RS08290(COG1151)
GCF_000018365.1_ASM1836v1_genomic.gff	-	523850	Thermococcus onnurineus NA1	Thermococcus onnurineus	Thermococcus	Thermococcaceae	Thermococcales	Thermococci	Euryarchaeota	Archaea	NC_011529.1	WP_012571978.1	E	E-1	TON_RS05195	>TON_RS05180(COG1719)	>TON_RS05185(COG2005)	>TON_RS05190(COG0437)	>TON_RS05195(COG1151)	>TON_RS05200(COG3640)	>TON_RS05205	>TON_RS05210(COG0651)	>TON_RS05215(COG0650)	>TON_RS05220(COG3261)	>TON_RS05225	>TON_RS05230(COG3260)	>TON_RS05235	>TON_RS05240(COG1320)	>TON_RS05245	>TON_RS05250(COG2111)	>TON_RS05255(COG1006)	>TON_RS05260(COG1863)	>TON_RS05265(COG0651)	>TON_RS05270(COG1363)
GCF_000018405.1_ASM1840v1_genomic.gff	-	96561	Desulfococcus oleovorans Hxd3	Desulfococcus oleovorans	Desulfococcus	Desulfobacteraceae	Desulfobacterales	Deltaproteobacteria	Proteobacteria	Bacteria	NC_009943.1	WP_012174881.1	E	E-1	DOLE_RS07520	>DOLE_RS07520(COG1151)	>DOLE_RS07525(COG0367)	>DOLE_RS07530(COG3572)	>DOLE_RS07535(COG0695)	>DOLE_RS07540(COG3894)	>DOLE_RS07545
GCF_000018405.1_ASM1840v1_genomic.gff	-	96561	Desulfococcus oleovorans Hxd3	Desulfococcus oleovorans	Desulfococcus	Desulfobacteraceae	Desulfobacterales	Deltaproteobacteria	Proteobacteria	Bacteria	NC_009943.1	WP_012176598.1	E	E-1	DOLE_RS16385	<DOLE_RS16370(COG1410)	<DOLE_RS16375(COG1456)	<DOLE_RS16380(COG1614)	<DOLE_RS16385(COG1151)	<DOLE_RS16390(COG2069)
GCF_000018425.1_ASM1842v1_genomic.gff	MAG	477974	Candidatus Desulforudis audaxviator MP104C	Candidatus Desulforudis audaxviator	Candidatus Desulforudis	Peptococcaceae	Clostridiales	Clostridia	Firmicutes	Bacteria	NC_010424.1	WP_012301267.1	A	A-1	DAUD_RS00565	>DAUD_RS00555(COG0190)	>DAUD_RS00560(COG3383)	>DAUD_RS00565(COG1152)	>DAUD_RS00570(COG1880)	>DAUD_RS00575(COG3640)	>DAUD_RS11785(COG1905)	>DAUD_RS00585(COG1894)	>DAUD_RS00590(COG3383)	>DAUD_RS00595(COG1614)	>DAUD_RS00600(COG1456)	>DAUD_RS00605(COG1410)	>DAUD_RS00610(COG2069)	>DAUD_RS00615(COG1908)
GCF_000018425.1_ASM1842v1_genomic.gff	MAG	477974	Candidatus Desulforudis audaxviator MP104C	Candidatus Desulforudis audaxviator	Candidatus Desulforudis	Peptococcaceae	Clostridiales	Clostridia	Firmicutes	Bacteria	NC_010424.1	WP_012301969.1	E	E-1	DAUD_RS04400	>DAUD_RS11535(COG3937)	>DAUD_RS04395(COG3083)	>DAUD_RS04400(COG1151)	>DAUD_RS04405(COG1614)	>DAUD_RS04410(COG1456)	>DAUD_RS04415(COG3894)	>DAUD_RS04420(COG3640)	>DAUD_RS04425(COG2069)	>DAUD_RS04430(COG1410)	>DAUD_RS04435(COG1148)	>DAUD_RS04440(COG1908)	>DAUD_RS04445	>DAUD_RS04450(COG0685)
GCF_000018485.1_ASM1848v1_genomic.gff	-	444158	Methanococcus maripaludis C6	Methanococcus maripaludis	Methanococcus	Methanococcaceae	Methanococcales	Methanococci	Euryarchaeota	Archaea	NC_009975.1	WP_012194400.1	A	A-1	MMARC6_RS08545	>MMARC6_RS08530(COG1389)	>MMARC6_RS08535(COG2264)	>MMARC6_RS08540(COG0030)	>MMARC6_RS08545(COG1152)	>MMARC6_RS08550(COG1880)	>MMARC6_RS08555(COG1614)	>MMARC6_RS08560(COG3640)	>MMARC6_RS08565(COG2069)	>MMARC6_RS08570(COG1456)	>MMARC6_RS08575(COG1142)	>MMARC6_RS08580(COG1532)	<MMARC6_RS08585(COG3640)	<MMARC6_RS08590(COG1810)
GCF_000019305.1_ASM1930v1_genomic.gff	-	498213	Clostridium botulinum B1 str. Okra	Clostridium botulinum	Clostridium	Clostridiaceae	Clostridiales	Clostridia	Firmicutes	Bacteria	NC_010516.1	WP_003402593.1	C	C-1	CLD_RS06965	>CLD_RS06945(COG0020)	>CLD_RS06950	>CLD_RS06955	>CLD_RS06960(COG1959)	>CLD_RS06965(COG1151)	>CLD_RS06970(COG0437)	>CLD_RS06975(COG1251)	>CLD_RS06980(COG0745)	>CLD_RS06985(COG0642)	>CLD_RS06990(COG4591)	>CLD_RS06995(COG1136)
GCF_000019305.1_ASM1930v1_genomic.gff	-	498213	Clostridium botulinum B1 str. Okra	Clostridium botulinum	Clostridium	Clostridiaceae	Clostridiales	Clostridia	Firmicutes	Bacteria	NC_010516.1	WP_015957800.1	D	D-1	CLD_RS11205	<CLD_RS11200(COG1063)	<CLD_RS11205(COG1151)	>CLD_RS11210(COG0375)	>CLD_RS11215(COG0378)
GCF_000019545.1_ASM1954v1_genomic.gff	-	498214	Clostridium botulinum A3 str. Loch Maree	Clostridium botulinum	Clostridium	Clostridiaceae	Clostridiales	Clostridia	Firmicutes	Bacteria	NC_010520.1	WP_012344310.1	C	C-1	CLK_RS07055	>CLK_RS07035(COG0020)	>CLK_RS07040	>CLK_RS07045	>CLK_RS07050(COG1959)	>CLK_RS07055(COG1151)	>CLK_RS07060(COG0437)	>CLK_RS07065(COG1251)
GCF_000019545.1_ASM1954v1_genomic.gff	-	498214	Clostridium botulinum A3 str. Loch Maree	Clostridium botulinum	Clostridium	Clostridiaceae	Clostridiales	Clostridia	Firmicutes	Bacteria	NC_010520.1	WP_012344493.1	D	D-1	CLK_RS11350	<CLK_RS11345(COG1063)	<CLK_RS11350(COG1151)	>CLK_RS11355(COG0375)	>CLK_RS11360(COG0378)
GCF_000019605.1_ASM1960v1_genomic.gff	MAG	374847	Candidatus Korarchaeum cryptofilum OPF8	Candidatus Korarchaeum cryptofilum	Candidatus Korarchaeum	unclassified Candidatus Korarchaeota	unclassified Candidatus Korarchaeota	unclassified Candidatus Korarchaeota	Candidatus Korarchaeota	Archaea	NC_010482.1	WP_012309407.1	E	E-1	KCR_RS03945	>KCR_RS03930(COG1719)	>KCR_RS08525(COG2005)	>KCR_RS03940(COG0437)	>KCR_RS03945(COG1151)	>KCR_RS03950(COG3640)	>KCR_RS03955(COG1148)	>KCR_RS03960	>KCR_RS03965(COG1150)	>KCR_RS03970(COG2048)
GCF_000020005.1_ASM2000v1_genomic.gff	-	457570	Natranaerobius thermophilus JW/NM-WN-LF	Natranaerobius thermophilus	Natranaerobius	Natranaerobiaceae	Natranaerobiales	Clostridia	Firmicutes	Bacteria	NC_010718.1	WP_012447323.1	D	D-2	NTHER_RS04420	<NTHER_RS04420(COG1151)	<NTHER_RS04425(COG2081)
GCF_000020365.1_ASM2036v1_genomic.gff	-	177437	Desulfobacterium autotrophicum HRM2	Desulfobacterium autotrophicum	Desulfobacterium	Desulfobacteraceae	Desulfobacterales	Deltaproteobacteria	Proteobacteria	Bacteria	NC_012108.1	WP_015903562.1	E	E-1	HRM2_RS08280	<HRM2_RS08255(COG3640)	<HRM2_RS08260	<HRM2_RS08265(COG1410)	<HRM2_RS08270(COG1456)	<HRM2_RS08275(COG1614)	<HRM2_RS08280(COG1151)	<HRM2_RS08285	<HRM2_RS08290(COG2069)	>HRM2_RS08295(COG2759)	<HRM2_RS08300(COG0190)	<HRM2_RS08305(COG3404)	>HRM2_RS08310(COG0685)
GCF_000020365.1_ASM2036v1_genomic.gff	-	177437	Desulfobacterium autotrophicum HRM2	Desulfobacterium autotrophicum	Desulfobacterium	Desulfobacteraceae	Desulfobacterales	Deltaproteobacteria	Proteobacteria	Bacteria	NC_012108.1	WP_015905891.1	E	E-3	HRM2_RS20230	<HRM2_RS20230(COG1151)
GCF_000020365.1_ASM2036v1_genomic.gff	-	177437	Desulfobacterium autotrophicum HRM2	Desulfobacterium autotrophicum	Desulfobacterium	Desulfobacteraceae	Desulfobacterales	Deltaproteobacteria	Proteobacteria	Bacteria	NC_012108.1	WP_015906132.1	E	E-1	HRM2_RS21415	<HRM2_RS21380(COG1881)	<HRM2_RS21385(COG1249)	<HRM2_RS21390(COG1146)	<HRM2_RS21395(COG0596)	<HRM2_RS21400(COG3439)	<HRM2_RS21405(COG1251)	<HRM2_RS21410(COG0437)	<HRM2_RS21415(COG1151)	<HRM2_RS21420
GCF_000020505.1_ASM2050v1_genomic.gff	-	517417	Chlorobaculum parvum NCIB 8327	Chlorobaculum parvum	Chlorobaculum	Chlorobiaceae	Chlorobiales	Chlorobia	Chlorobi	Bacteria	NC_011027.1	WP_012502432.1	B	B-2	CPAR_RS06050	<CPAR_RS06045	<CPAR_RS06050(COG1151)	<CPAR_RS06055	<CPAR_RS06060(COG1116)	<CPAR_RS06065(COG1116)	<CPAR_RS06070(COG0600)	<CPAR_RS06075(COG0715)	<CPAR_RS06080(COG3640)
GCF_000020725.1_ASM2072v1_genomic.gff	-	404380	Geobacter bemidjiensis Bem	Geobacter bemidjiensis	Geobacter	Geobacteraceae	Desulfuromonadales	Deltaproteobacteria	Proteobacteria	Bacteria	NC_011146.1	WP_012528513.1	F	F-1	GBEM_RS00360	<GBEM_RS00325(COG0642)	>GBEM_RS00330(COG0664)	>GBEM_RS20535(COG3260)	>GBEM_RS00340(COG0852)	>GBEM_RS00345(COG3261)	>GBEM_RS00350(COG0375)	>GBEM_RS00355(COG1142)	>GBEM_RS00360(COG1151)	>GBEM_RS00365(COG3640)
GCF_000020725.1_ASM2072v1_genomic.gff	-	404380	Geobacter bemidjiensis Bem	Geobacter bemidjiensis	Geobacter	Geobacteraceae	Desulfuromonadales	Deltaproteobacteria	Proteobacteria	Bacteria	NC_011146.1	WP_012530168.1	B	B-3	GBEM_RS08715	<GBEM_RS08700(COG1116)	<GBEM_RS08705(COG0600)	<GBEM_RS08710(COG0715)	<GBEM_RS08715(COG1151)
GCF_000021385.1_ASM2138v1_genomic.gff	-	883	Desulfovibrio vulgaris str. 'Miyazaki F'	Desulfovibrio vulgaris	Desulfovibrio	Desulfovibrionaceae	Desulfovibrionales	Deltaproteobacteria	Proteobacteria	Bacteria	NC_011769.1	WP_012613342.1	E	E-2	DVMF_RS11300	<DVMF_RS11295(COG3640)	<DVMF_RS11300(COG1151)	<DVMF_RS11305(COG0664)
GCF_000021565.1_ASM2156v1_genomic.gff	-	123214	Persephonella marina EX-H1	Persephonella marina	Persephonella	Hydrogenothermaceae	Aquificales	Aquificae	Aquificae	Bacteria	NC_012440.1	WP_012675684.1	D	others	PERMA_RS00525	>PERMA_RS00525(COG1151)
GCF_000021905.1_ASM2190v1_genomic.gff	-	439235	Desulfatibacillum alkenivorans AK-01	Desulfatibacillum alkenivorans	Desulfatibacillum	Desulfobacteraceae	Desulfobacterales	Deltaproteobacteria	Proteobacteria	Bacteria	NC_011768.1	WP_012609824.1	E	E-1	DALK_RS03555	>DALK_RS03545(COG3894)	>DALK_RS03550(COG2069)	>DALK_RS03555(COG1151)	>DALK_RS03560(COG1614)	>DALK_RS03565(COG1456)	>DALK_RS03570(COG1410)	>DALK_RS03575	>DALK_RS03580(COG2145)	>DALK_RS03585(COG0611)	>DALK_RS03590(COG2128)	<DALK_RS03595(COG0655)
GCF_000021905.1_ASM2190v1_genomic.gff	-	439235	Desulfatibacillum alkenivorans AK-01	Desulfatibacillum alkenivorans	Desulfatibacillum	Desulfobacteraceae	Desulfobacterales	Deltaproteobacteria	Proteobacteria	Bacteria	NC_011768.1	WP_015947146.1	E	E-3	DALK_RS12295	>DALK_RS12205(COG0426)	>DALK_RS12210(COG0642)	>DALK_RS27960(COG0745)	>DALK_RS12220(COG1192)	>DALK_RS12225	>DALK_RS12230(COG0735)	>DALK_RS12235(COG1592)	>DALK_RS12240(COG2033)	>DALK_RS12245	>DALK_RS12250	>DALK_RS12255	>DALK_RS12260(COG1773)	>DALK_RS12265(COG0426)	>DALK_RS12270(COG1141)	>DALK_RS12275	>DALK_RS12280	>DALK_RS12285(COG1489)	>DALK_RS12290	>DALK_RS12295(COG1151)	>DALK_RS12300(COG0426)	>DALK_RS12305
GCF_000021925.1_ASM2192v1_genomic.gff	-	272564	Desulfitobacterium hafniense DCB-2	Desulfitobacterium hafniense	Desulfitobacterium	Peptococcaceae	Clostridiales	Clostridia	Firmicutes	Bacteria	NC_011830.1	WP_015943072.1	F	F-1	DHAF_RS04435	>DHAF_RS04380	>DHAF_RS04385(COG3585)	>DHAF_RS04390(COG1968)	>DHAF_RS04395(COG1704)	>DHAF_RS04400(COG1512)	>DHAF_RS04405(COG0011)	>DHAF_RS04410(COG0600)	>DHAF_RS04415(COG0715)	>DHAF_RS04420(COG1116)	>DHAF_RS04425(COG0664)	>DHAF_RS04430(COG1142)	>DHAF_RS04435(COG1151)	>DHAF_RS04440(COG1251)	>DHAF_RS04445(COG0451)	>DHAF_RS04450(COG1208)	>DHAF_RS04455	>DHAF_RS04460	>DHAF_RS04465(COG0463)	<DHAF_RS04470(COG0438)
GCF_000021925.1_ASM2192v1_genomic.gff	-	272564	Desulfitobacterium hafniense DCB-2	Desulfitobacterium hafniense	Desulfitobacterium	Peptococcaceae	Clostridiales	Clostridia	Firmicutes	Bacteria	NC_011830.1	WP_005813738.1	D	D-1	DHAF_RS05855	>DHAF_RS05855(COG1151)	>DHAF_RS05860(COG0664)	>DHAF_RS05865(COG2846)	>DHAF_RS05870	>DHAF_RS05875
GCF_000021925.1_ASM2192v1_genomic.gff	-	272564	Desulfitobacterium hafniense DCB-2	Desulfitobacterium hafniense	Desulfitobacterium	Peptococcaceae	Clostridiales	Clostridia	Firmicutes	Bacteria	NC_011830.1	WP_011459810.1	F	F-1	DHAF_RS13995	<DHAF_RS13965(COG1410)	<DHAF_RS13970(COG2069)	<DHAF_RS13975(COG3640)	<DHAF_RS13980(COG3894)	<DHAF_RS13985(COG1456)	<DHAF_RS13990(COG1614)	<DHAF_RS13995(COG1151)	<DHAF_RS14000(COG3640)
GCF_000021925.1_ASM2192v1_genomic.gff	-	272564	Desulfitobacterium hafniense DCB-2	Desulfitobacterium hafniense	Desulfitobacterium	Peptococcaceae	Clostridiales	Clostridia	Firmicutes	Bacteria	NC_011830.1	WP_015944792.1	F	F-1	DHAF_RS18935	>DHAF_RS18920	>DHAF_RS18925(COG0664)	>DHAF_RS18930(COG1142)	>DHAF_RS18935(COG1151)	>DHAF_RS18940(COG3640)
GCF_000021965.1_ASM2196v1_genomic.gff	-	521011	Methanosphaerula palustris E1-9c	Methanosphaerula palustris	Methanosphaerula	Methanoregulaceae	Methanomicrobiales	Methanomicrobia	Euryarchaeota	Archaea	NC_011832.1	WP_012617523.1	E	E-1	MPAL_RS04275	>MPAL_RS04220(COG0463)	>MPAL_RS15000(COG0726)	>MPAL_RS04225(COG5653)	>MPAL_RS04230	>MPAL_RS04235(COG1817)	>MPAL_RS04240(COG2120)	>MPAL_RS04245(COG0439)	>MPAL_RS04250(COG1387)	>MPAL_RS04255(COG0367)	>MPAL_RS04260(COG0438)	>MPAL_RS04265(COG3391)	>MPAL_RS04270(COG0437)	>MPAL_RS04275(COG1151)	>MPAL_RS04280(COG1905)	>MPAL_RS04285(COG1894)	>MPAL_RS04290(COG1034)	>MPAL_RS04295(COG3640)	>MPAL_RS04300
GCF_000022065.1_ASM2206v1_genomic.gff	-	394503	[Clostridium] cellulolyticum H10	[Clostridium] cellulolyticum	Ruminiclostridium	Ruminococcaceae	Clostridiales	Clostridia	Firmicutes	Bacteria	NC_011898.1	WP_012634882.1	B	B-1	CCEL_RS02205	>CCEL_RS02185(COG1191)	<CCEL_RS02190(COG1116)	<CCEL_RS02195(COG0600)	<CCEL_RS02200(COG0715)	<CCEL_RS02205(COG1151)
GCF_000022065.1_ASM2206v1_genomic.gff	-	394503	[Clostridium] cellulolyticum H10	[Clostridium] cellulolyticum	Ruminiclostridium	Ruminococcaceae	Clostridiales	Clostridia	Firmicutes	Bacteria	NC_011898.1	WP_015926279.1	D	D-2	CCEL_RS14700	>CCEL_RS14700(COG1151)	>CCEL_RS14705
GCF_000022125.1_ASM2212v1_genomic.gff	-	525146	Desulfovibrio desulfuricans subsp. desulfuricans str. ATCC 27774	Desulfovibrio desulfuricans	Desulfovibrio	Desulfovibrionaceae	Desulfovibrionales	Deltaproteobacteria	Proteobacteria	Bacteria	NC_011883.1	WP_012624025.1	E	E-2	DDES_RS02010	<DDES_RS02005(COG3640)	<DDES_RS02010(COG1151)	<DDES_RS02015(COG0664)	<DDES_RS02020(COG0298)
GCF_000022265.1_ASM2226v1_genomic.gff	-	316067	Geobacter daltonii FRC-32	Geobacter daltonii	Geobacter	Geobacteraceae	Desulfuromonadales	Deltaproteobacteria	Proteobacteria	Bacteria	NC_011979.1	WP_012645460.1	B	B-3	GEOB_RS01785	<GEOB_RS01770(COG1116)	<GEOB_RS01775(COG0600)	<GEOB_RS01780(COG0715)	<GEOB_RS01785(COG1151)	<GEOB_RS01790(COG2939)	<GEOB_RS01795(COG1566)	<GEOB_RS01800(COG2274)	<GEOB_RS01805(COG1538)	<GEOB_RS01810(COG0457)	<GEOB_RS01815
GCF_000022265.1_ASM2226v1_genomic.gff	-	316067	Geobacter daltonii FRC-32	Geobacter daltonii	Geobacter	Geobacteraceae	Desulfuromonadales	Deltaproteobacteria	Proteobacteria	Bacteria	NC_011979.1	WP_012646135.1	E	E-1	GEOB_RS05200	<GEOB_RS05190(COG2128)	>GEOB_RS05195(COG3279)	>GEOB_RS05200(COG1151)	>GEOB_RS05205(COG3640)	>GEOB_RS05210(COG0437)	>GEOB_RS05215(COG1251)
GCF_000022365.1_ASM2236v1_genomic.gff	-	593117	Thermococcus gammatolerans EJ3	Thermococcus gammatolerans	Thermococcus	Thermococcaceae	Thermococcales	Thermococci	Euryarchaeota	Archaea	NC_012804.1	WP_015858443.1	E	E-1	TGAM_RS04205	<TGAM_RS04195(COG3640)	>TGAM_RS04200(COG0437)	>TGAM_RS04205(COG1151)	>TGAM_RS04210(COG1149)	>TGAM_RS04215(COG0493)	>TGAM_RS04220(COG0437)	>TGAM_RS04225(COG0680)
GCF_000022765.1_ASM2276v1_genomic.gff	-	536232	Clostridium botulinum A2 str. Kyoto	Clostridium botulinum	Clostridium	Clostridiaceae	Clostridiales	Clostridia	Firmicutes	Bacteria	NC_012563.1	WP_012705760.1	C	C-1	CLM_RS07115	>CLM_RS07100(COG0020)	>CLM_RS20030	>CLM_RS07105	>CLM_RS07110(COG1959)	>CLM_RS07115(COG1151)	>CLM_RS07120(COG0437)	>CLM_RS07125(COG1251)
GCF_000022765.1_ASM2276v1_genomic.gff	-	536232	Clostridium botulinum A2 str. Kyoto	Clostridium botulinum	Clostridium	Clostridiaceae	Clostridiales	Clostridia	Firmicutes	Bacteria	NC_012563.1	WP_012705210.1	D	D-1	CLM_RS11475	<CLM_RS11470(COG1063)	<CLM_RS11475(COG1151)	>CLM_RS11480(COG0375)	>CLM_RS11485(COG0378)
GCF_000023225.1_ASM2322v1_genomic.gff	-	525897	Desulfomicrobium baculatum DSM 4028	Desulfomicrobium baculatum	Desulfomicrobium	Desulfomicrobiaceae	Desulfovibrionales	Deltaproteobacteria	Proteobacteria	Bacteria	NC_013173.1	WP_015773149.1	E	E-2	DBAC_RS04755	<DBAC_RS04745(COG0664)	<DBAC_RS04750(COG3640)	<DBAC_RS04755(COG1151)
GCF_000023445.1_ASM2344v1_genomic.gff	-	526222	Desulfovibrio salexigens DSM 2638	Desulfovibrio salexigens	Desulfovibrio	Desulfovibrionaceae	Desulfovibrionales	Deltaproteobacteria	Proteobacteria	Bacteria	NC_012881.1	WP_015852380.1	E	E-2	DESAL_RS12615	<DESAL_RS12610(COG3640)	<DESAL_RS12615(COG1151)	<DESAL_RS12620(COG0664)	<DESAL_RS12625(COG1295)	<DESAL_RS12630(COG2982)	<DESAL_RS12635(COG1578)
GCF_000023985.1_ASM2398v1_genomic.gff	-	573064	Methanocaldococcus fervens AG86	Methanocaldococcus fervens	Methanocaldococcus	Methanocaldococcaceae	Methanococcales	Methanococci	Euryarchaeota	Archaea	NC_013156.1	WP_015790782.1	A	A-1	MEFER_RS01015	<MEFER_RS01000(COG1614)	<MEFER_RS01005(COG1142)	<MEFER_RS01010(COG1880)	<MEFER_RS01015(COG1152)
GCF_000024205.1_ASM2420v1_genomic.gff	-	485916	Desulfotomaculum acetoxidans DSM 771	Desulfotomaculum acetoxidans	Desulfotomaculum	Peptococcaceae	Clostridiales	Clostridia	Firmicutes	Bacteria	NC_013216.1	WP_015756867.1	F	F-1	DTOX_RS06155	<DTOX_RS06135(COG1149)	>DTOX_RS06150(COG3640)	>DTOX_RS06155(COG1151)	>DTOX_RS06160(COG1614)	>DTOX_RS06165(COG1456)	>DTOX_RS06170(COG3894)	>DTOX_RS06175(COG3640)	>DTOX_RS06180(COG2069)	>DTOX_RS06185(COG1410)	>DTOX_RS06190(COG1148)	>DTOX_RS22040(COG1908)	>DTOX_RS22045(COG1908)
GCF_000024205.1_ASM2420v1_genomic.gff	-	485916	Desulfotomaculum acetoxidans DSM 771	Desulfotomaculum acetoxidans	Desulfotomaculum	Peptococcaceae	Clostridiales	Clostridia	Firmicutes	Bacteria	NC_013216.1	WP_015757841.1	E	E-1	DTOX_RS11395	>DTOX_RS11390(COG2814)	<DTOX_RS11395(COG1151)	<DTOX_RS11400(COG1142)	<DTOX_RS11405(COG1251)	>DTOX_RS11410(COG0655)
GCF_000024205.1_ASM2420v1_genomic.gff	-	485916	Desulfotomaculum acetoxidans DSM 771	Desulfotomaculum acetoxidans	Desulfotomaculum	Peptococcaceae	Clostridiales	Clostridia	Firmicutes	Bacteria	NC_013216.1	WP_015758381.1	C	C-2	DTOX_RS14210	>DTOX_RS14190	>DTOX_RS14195	>DTOX_RS14200(COG1509)	>DTOX_RS14205(COG1959)	>DTOX_RS14210(COG1151)	>DTOX_RS14215(COG0437)	>DTOX_RS14220(COG1251)	>DTOX_RS14225(COG2002)
GCF_000024205.1_ASM2420v1_genomic.gff	-	485916	Desulfotomaculum acetoxidans DSM 771	Desulfotomaculum acetoxidans	Desulfotomaculum	Peptococcaceae	Clostridiales	Clostridia	Firmicutes	Bacteria	NC_013216.1	WP_015759171.1	F	F-1	DTOX_RS18345	>DTOX_RS18345(COG1151)	>DTOX_RS18350(COG1614)
GCF_000024325.1_ASM2432v1_genomic.gff	-	485915	Desulfohalobium retbaense DSM 5692	Desulfohalobium retbaense	Desulfohalobium	Desulfohalobiaceae	Desulfovibrionales	Deltaproteobacteria	Proteobacteria	Bacteria	NC_013223.1	WP_015751669.1	E	E-2	DRET_RS06165	>DRET_RS06160(COG0664)	>DRET_RS06165(COG1151)	>DRET_RS06170(COG3640)
GCF_000024605.1_ASM2460v1_genomic.gff	-	429009	Ammonifex degensii KC4	Ammonifex degensii	Ammonifex	Thermoanaerobacteraceae	Thermoanaerobacterales	Clostridia	Firmicutes	Bacteria	NC_013385.1	WP_083774318.1	E	E-1	ADEG_RS01675	>ADEG_RS01610(COG0438)	>ADEG_RS01615	>ADEG_RS01620(COG1032)	>ADEG_RS01625(COG0535)	>ADEG_RS01630(COG1082)	>ADEG_RS11605(COG0840)	>ADEG_RS01635	>ADEG_RS01640	>ADEG_RS01645	>ADEG_RS11105(COG3640)	>ADEG_RS01650(COG3640)	>ADEG_RS01655(COG1905)	>ADEG_RS01660(COG1894)	>ADEG_RS01665(COG1149)	>ADEG_RS01670(COG3383)	>ADEG_RS01675(COG1151)	>ADEG_RS01680(COG1614)	>ADEG_RS01685(COG1456)	>ADEG_RS01690(COG3894)	>ADEG_RS01695(COG3640)	>ADEG_RS01700(COG2069)	>ADEG_RS01705(COG1410)	>ADEG_RS01710(COG1148)	>ADEG_RS01715(COG1908)	>ADEG_RS01720	>ADEG_RS01725(COG0685)	>ADEG_RS01730	>ADEG_RS01735(COG0289)	>ADEG_RS01740(COG0373)	>ADEG_RS01745(COG0452)	>ADEG_RS01750(COG0136)
GCF_000024625.1_ASM2462v1_genomic.gff	-	579137	Methanocaldococcus vulcanius M7	Methanocaldococcus vulcanius	Methanocaldococcus	Methanocaldococcaceae	Methanococcales	Methanococci	Euryarchaeota	Archaea	NC_013407.1	WP_048196754.1	C	C-3	METVU_RS03065	>METVU_RS03065(COG1151)	>METVU_RS03070(COG3259)	>METVU_RS03075(COG1941)	>METVU_RS03080(COG1035)	>METVU_RS03085(COG1059)
GCF_000024625.1_ASM2462v1_genomic.gff	-	579137	Methanocaldococcus vulcanius M7	Methanocaldococcus vulcanius	Methanocaldococcus	Methanocaldococcaceae	Methanococcales	Methanococci	Euryarchaeota	Archaea	NC_013407.1	WP_015733265.1	A	A-1	METVU_RS05820	<METVU_RS05805(COG1614)	<METVU_RS05810(COG1142)	<METVU_RS05815(COG1880)	<METVU_RS05820(COG1152)	<METVU_RS05825(COG2425)	<METVU_RS05830	<METVU_RS05835(COG0714)	<METVU_RS05840(COG0864)
GCF_000024945.1_ASM2494v1_genomic.gff	-	479436	Veillonella parvula DSM 2008	Veillonella parvula	Veillonella	Veillonellaceae	Veillonellales	Negativicutes	Firmicutes	Bacteria	NC_013520.1	WP_012863803.1	B	B-1	VPAR_RS01045	>VPAR_RS01045(COG1151)
GCF_000025505.1_ASM2550v1_genomic.gff	-	589924	Ferroglobus placidus DSM 10642	Ferroglobus placidus	Ferroglobus	Archaeoglobaceae	Archaeoglobales	Archaeoglobi	Euryarchaeota	Archaea	NC_013849.1	WP_012965244.1	A	A-2	FERP_RS03645	>FERP_RS13265	>FERP_RS03630(COG1456)	>FERP_RS03635(COG1029)	>FERP_RS03640(COG1153)	>FERP_RS03645(COG1152)	>FERP_RS03650(COG1880)	>FERP_RS03655(COG1614)	>FERP_RS03660(COG3640)	>FERP_RS03665(COG2069)	>FERP_RS03670(COG1456)	>FERP_RS03675(COG0498)
GCF_000025505.1_ASM2550v1_genomic.gff	-	589924	Ferroglobus placidus DSM 10642	Ferroglobus placidus	Ferroglobus	Archaeoglobaceae	Archaeoglobales	Archaeoglobi	Euryarchaeota	Archaea	NC_013849.1	WP_012966822.1	D	D-1	FERP_RS11850	>FERP_RS11850(COG1151)
GCF_000025505.1_ASM2550v1_genomic.gff	-	589924	Ferroglobus placidus DSM 10642	Ferroglobus placidus	Ferroglobus	Archaeoglobaceae	Archaeoglobales	Archaeoglobi	Euryarchaeota	Archaea	NC_013849.1	WP_083777753.1	E	E-2	FERP_RS12825	<FERP_RS12815	<FERP_RS12820(COG1251)	<FERP_RS12825(COG1151)	<FERP_RS12830(COG0437)
GCF_000025525.1_ASM2552v1_genomic.gff	-	644281	Methanocaldococcus sp. FS406-22	Methanocaldococcus sp. FS406-22	Methanocaldococcus	Methanocaldococcaceae	Methanococcales	Methanococci	Euryarchaeota	Archaea	NC_013887.1	WP_048197349.1	A	A-1	MFS40622_RS00630	<MFS40622_RS00615(COG1614)	<MFS40622_RS00620(COG1142)	<MFS40622_RS00625(COG1880)	<MFS40622_RS00630(COG1152)	<MFS40622_RS09360(COG1614)	<MFS40622_RS00640(COG1522)	<MFS40622_RS00645(COG1719)
GCF_000025525.1_ASM2552v1_genomic.gff	-	644281	Methanocaldococcus sp. FS406-22	Methanocaldococcus sp. FS406-22	Methanocaldococcus	Methanocaldococcaceae	Methanococcales	Methanococci	Euryarchaeota	Archaea	NC_013887.1	WP_012981026.1	C	C-3	MFS40622_RS07230	>MFS40622_RS07175(COG0599)	>MFS40622_RS07180(COG2033)	>MFS40622_RS07185(COG1773)	>MFS40622_RS07190(COG4746)	>MFS40622_RS07195(COG1773)	>MFS40622_RS07200(COG0450)	>MFS40622_RS07205(COG1592)	>MFS40622_RS07210	>MFS40622_RS07215(COG0426)	>MFS40622_RS07220	>MFS40622_RS07225(COG1036)	>MFS40622_RS07230(COG1151)	>MFS40622_RS07235(COG3259)	>MFS40622_RS07240(COG1941)	>MFS40622_RS07245(COG1035)	>MFS40622_RS07250(COG1059)
GCF_000025865.1_ASM2586v1_genomic.gff	-	547558	Methanohalophilus mahii DSM 5219	Methanohalophilus mahii	Methanohalophilus	Methanosarcinaceae	Methanosarcinales	Methanomicrobia	Euryarchaeota	Archaea	NC_014002.1	WP_013037613.1	A	A-1	MMAH_RS05830	>MMAH_RS05830(COG1152)	>MMAH_RS05835(COG1880)	>MMAH_RS05840(COG1614)	>MMAH_RS05845(COG3640)	>MMAH_RS05850(COG2069)	>MMAH_RS05855(COG1456)	>MMAH_RS05860(COG2768)	>MMAH_RS05865(COG0136)
GCF_000063445.1_ASM6344v1_genomic.gff	-	351160	Methanocella arvoryzae MRE50	Methanocella arvoryzae	Methanocella	Methanocellaceae	Methanocellales	Methanomicrobia	Euryarchaeota	Archaea	NC_009464.1	WP_012037082.1	A	A-1	RCI_RS13880	>RCI_RS13840(COG0484)	<RCI_RS13845(COG3640)	<RCI_RS13850(COG3640)	<RCI_RS13855(COG3894)	<RCI_RS13860(COG1456)	<RCI_RS13865(COG2069)	<RCI_RS13870(COG1614)	<RCI_RS13875(COG1880)	<RCI_RS13880(COG1152)
GCF_000063585.1_ASM6358v1_genomic.gff	-	413999	Clostridium botulinum A str. ATCC 3502	Clostridium botulinum	Clostridium	Clostridiaceae	Clostridiales	Clostridia	Firmicutes	Bacteria	NC_009495.1	WP_011948938.1	C	C-1	CBO1331	>CBO1328(COG0020)	>CBO1329	>CBO1330(COG1959)	>CBO1331(COG1151)	>CBO1332(COG0437)	>CBO1333(COG1251)
GCF_000063585.1_ASM6358v1_genomic.gff	-	413999	Clostridium botulinum A str. ATCC 3502	Clostridium botulinum	Clostridium	Clostridiaceae	Clostridiales	Clostridia	Firmicutes	Bacteria	NC_009495.1	WP_012047757.1	D	D-1	CBO2218	<CBO2217(COG1063)	<CBO2218(COG1151)	>CBO2219(COG0375)	>CBO2220(COG0378)
GCF_000091665.1_ASM9166v1_genomic.gff	-	243232	Methanocaldococcus jannaschii DSM 2661	Methanocaldococcus jannaschii	Methanocaldococcus	Methanocaldococcaceae	Methanococcales	Methanococci	Euryarchaeota	Archaea	NC_000909.1	WP_010869648.1	A	A-1	MJ_RS00795	>MJ_RS00780(COG1719)	>MJ_RS00785(COG1522)	>MJ_RS09290(COG1614)	>MJ_RS00795(COG1152)	>MJ_RS00800(COG1880)	>MJ_RS00805(COG1142)	>MJ_RS00810(COG1614)
GCF_000091665.1_ASM9166v1_genomic.gff	-	243232	Methanocaldococcus jannaschii DSM 2661	Methanocaldococcus jannaschii	Methanocaldococcus	Methanocaldococcaceae	Methanococcales	Methanococci	Euryarchaeota	Archaea	NC_000909.1	WP_010870233.1	C	C-3	MJ_RS03885	<MJ_RS03865(COG1059)	<MJ_RS03870(COG1035)	<MJ_RS03875(COG1941)	<MJ_RS03880(COG3259)	<MJ_RS03885(COG1151)
GCF_000092205.1_ASM9220v1_genomic.gff	-	589865	Desulfurivibrio alkaliphilus AHT 2	Desulfurivibrio alkaliphilus	Desulfurivibrio	Desulfobulbaceae	Desulfobacterales	Deltaproteobacteria	Proteobacteria	Bacteria	NC_014216.1	WP_013162574.1	E	E-2	DAAHT2_RS01720	<DAAHT2_RS01720(COG1151)	<DAAHT2_RS01725
GCF_000092205.1_ASM9220v1_genomic.gff	-	589865	Desulfurivibrio alkaliphilus AHT 2	Desulfurivibrio alkaliphilus	Desulfurivibrio	Desulfobulbaceae	Desulfobacterales	Deltaproteobacteria	Proteobacteria	Bacteria	NC_014216.1	WP_013163061.1	E	E-3	DAAHT2_RS04200	<DAAHT2_RS04160	<DAAHT2_RS04165(COG1148)	<DAAHT2_RS14230(COG3383)	<DAAHT2_RS04185(COG1456)	<DAAHT2_RS04190(COG1614)	<DAAHT2_RS04195(COG2069)	<DAAHT2_RS04200(COG1151)	<DAAHT2_RS04205(COG0190)	<DAAHT2_RS04210(COG2804)
GCF_000092305.1_ASM9230v1_genomic.gff	-	573063	Methanocaldococcus infernus ME	Methanocaldococcus infernus	Methanocaldococcus	Methanocaldococcaceae	Methanococcales	Methanococci	Euryarchaeota	Archaea	NC_014122.1	WP_013100433.1	A	A-1	METIN_RS05140	<METIN_RS05140(COG1152)	>METIN_RS05145(COG1880)
GCF_000092345.1_ASM9234v1_genomic.gff	-	758678	Clostridium botulinum F str. 230613	Clostridium botulinum	Clostridium	Clostridiaceae	Clostridiales	Clostridia	Firmicutes	Bacteria	NC_017297.1	WP_011988187.1	C	C-1	CBF_RS06945	>CBF_RS06930(COG0020)	>CBF_RS06935	>CBF_RS06940(COG1959)	>CBF_RS06945(COG1151)	>CBF_RS06950(COG0437)	>CBF_RS06955(COG1251)	>CBF_RS06960(COG0745)	>CBF_RS06965(COG0642)	>CBF_RS06970(COG4591)	>CBF_RS06975(COG1136)
GCF_000092345.1_ASM9234v1_genomic.gff	-	758678	Clostridium botulinum F str. 230613	Clostridium botulinum	Clostridium	Clostridiaceae	Clostridiales	Clostridia	Firmicutes	Bacteria	NC_017297.1	WP_012100194.1	D	D-1	CBF_RS11135	<CBF_RS11130(COG1063)	<CBF_RS11135(COG1151)	>CBF_RS11140(COG0375)	>CBF_RS11145(COG0378)
GCF_000092945.1_ASM9294v1_genomic.gff	-	635013	Thermincola potens JR	Thermincola potens	Thermincola	Peptococcaceae	Clostridiales	Clostridia	Firmicutes	Bacteria	NC_014152.1	WP_013120040.1	F	F-1	THERJR_RS05890	>THERJR_RS05885(COG3640)	>THERJR_RS05890(COG1151)	>THERJR_RS05895(COG1614)	>THERJR_RS05900(COG1456)	>THERJR_RS05905(COG2069)	>THERJR_RS05910(COG1410)	>THERJR_RS05915(COG1148)	>THERJR_RS05920(COG1908)	>THERJR_RS05925	>THERJR_RS05930(COG0685)	>THERJR_RS05935(COG1148)
GCF_000092945.1_ASM9294v1_genomic.gff	-	635013	Thermincola potens JR	Thermincola potens	Thermincola	Peptococcaceae	Clostridiales	Clostridia	Firmicutes	Bacteria	NC_014152.1	WP_013120796.1	F	F-1	THERJR_RS09745	<THERJR_RS15515(COG0457)	<THERJR_RS09740(COG1251)	<THERJR_RS09745(COG1151)	<THERJR_RS09750(COG0437)	<THERJR_RS09755(COG4783)	<THERJR_RS09760(COG0842)	<THERJR_RS09765(COG1131)
GCF_000092945.1_ASM9294v1_genomic.gff	-	635013	Thermincola potens JR	Thermincola potens	Thermincola	Peptococcaceae	Clostridiales	Clostridia	Firmicutes	Bacteria	NC_014152.1	WP_013120990.1	D	D-1	THERJR_RS10775	<THERJR_RS10760(COG1328)	<THERJR_RS10765(COG1327)	<THERJR_RS10770(COG5582)	<THERJR_RS10775(COG1151)	<THERJR_RS10780(COG1873)	<THERJR_RS10785(COG0616)	<THERJR_RS10790	<THERJR_RS10795(COG1191)	<THERJR_RS10800(COG1191)
GCF_000092945.1_ASM9294v1_genomic.gff	-	635013	Thermincola potens JR	Thermincola potens	Thermincola	Peptococcaceae	Clostridiales	Clostridia	Firmicutes	Bacteria	NC_014152.1	WP_013121776.1	F	F-1	THERJR_RS14890	<THERJR_RS14875	<THERJR_RS14880(COG0409)	<THERJR_RS14885(COG3640)	<THERJR_RS14890(COG1151)	<THERJR_RS14895(COG1142)	<THERJR_RS14900(COG0375)	<THERJR_RS14905(COG3261)	<THERJR_RS14910(COG3262)	<THERJR_RS14915(COG1143)	<THERJR_RS14920(COG3260)	<THERJR_RS14925(COG0650)	<THERJR_RS14930(COG0651)	<THERJR_RS14935(COG0664)	<THERJR_RS14940(COG0115)	<THERJR_RS14945(COG0147)	<THERJR_RS14950(COG0104)	<THERJR_RS14955(COG0305)	<THERJR_RS14960(COG1067)	<THERJR_RS14965(COG0359)
GCF_000143685.1_ASM14368v1_genomic.gff	-	748727	Clostridium ljungdahlii DSM 13528	Clostridium ljungdahlii	Clostridium	Clostridiaceae	Clostridiales	Clostridia	Firmicutes	Bacteria	NC_014328.1	WP_013237576.1	C	C-2	CLJU_RS04490	<CLJU_RS04480(COG1251)	<CLJU_RS04485(COG0437)	<CLJU_RS04490(COG1151)
GCF_000143685.1_ASM14368v1_genomic.gff	-	748727	Clostridium ljungdahlii DSM 13528	Clostridium ljungdahlii	Clostridium	Clostridiaceae	Clostridiales	Clostridia	Firmicutes	Bacteria	NC_014328.1	WP_013238446.1	D	D-1	CLJU_RS08800	>CLJU_RS08795(COG1113)	>CLJU_RS08800(COG1151)
GCF_000143685.1_ASM14368v1_genomic.gff	-	748727	Clostridium ljungdahlii DSM 13528	Clostridium ljungdahlii	Clostridium	Clostridiaceae	Clostridiales	Clostridia	Firmicutes	Bacteria	NC_014328.1	WP_013240371.1	E	E-1	CLJU_RS18550	<CLJU_RS18475	<CLJU_RS18480(COG3894)	<CLJU_RS18485(COG0509)	<CLJU_RS18490(COG1614)	<CLJU_RS18495(COG1410)	<CLJU_RS18500(COG1456)	<CLJU_RS18505(COG2069)	<CLJU_RS18510(COG3640)	<CLJU_RS18515(COG1249)	<CLJU_RS18520(COG0685)	<CLJU_RS18525	<CLJU_RS18530(COG0190)	<CLJU_RS18535(COG3404)	<CLJU_RS18540(COG2759)	<CLJU_RS18545(COG3640)	<CLJU_RS18550(COG1151)
GCF_000143965.1_ASM14396v1_genomic.gff	-	644282	Desulfarculus baarsii DSM 2075	Desulfarculus baarsii	Desulfarculus	Desulfarculaceae	Desulfarculales	Deltaproteobacteria	Proteobacteria	Bacteria	NC_014365.1	WP_013257074.1	E	E-1	DEBA_RS01195	<DEBA_RS01180(COG1410)	<DEBA_RS01185(COG1456)	<DEBA_RS01190(COG1614)	<DEBA_RS01195(COG1151)	<DEBA_RS01200(COG2069)	<DEBA_RS01205(COG3640)
GCF_000144625.1_ASM14462v1_genomic.gff	-	610130	[Clostridium] saccharolyticum WM1	[Clostridium] saccharolyticum	Lachnoclostridium	Lachnospiraceae	Clostridiales	Clostridia	Firmicutes	Bacteria	NC_014376.1	WP_013271635.1	D	D-1	CLOSA_RS04755	>CLOSA_RS04745(COG0583)	>CLOSA_RS04750(COG0020)	>CLOSA_RS04755(COG1151)	>CLOSA_RS04760(COG2972)	>CLOSA_RS04765(COG4753)	>CLOSA_RS04770(COG1653)	>CLOSA_RS04775(COG1653)	>CLOSA_RS04780	>CLOSA_RS04785(COG1175)	>CLOSA_RS04790(COG0395)	>CLOSA_RS04795(COG0383)	>CLOSA_RS04800	>CLOSA_RS04805(COG0176)	>CLOSA_RS04810(COG1846)	>CLOSA_RS04815(COG1773)
GCF_000144645.1_ASM14464v1_genomic.gff	-	555079	Thermosediminibacter oceani DSM 16646	Thermosediminibacter oceani	Thermosediminibacter	Thermoanaerobacterales Family III. Incertae Sedis	Thermoanaerobacterales	Clostridia	Firmicutes	Bacteria	NC_014377.1	WP_013275166.1	C	C-2	TOCE_RS01730	<TOCE_RS01730(COG1151)	<TOCE_RS01735(COG1959)
GCF_000144645.1_ASM14464v1_genomic.gff	-	555079	Thermosediminibacter oceani DSM 16646	Thermosediminibacter oceani	Thermosediminibacter	Thermoanaerobacterales Family III. Incertae Sedis	Thermoanaerobacterales	Clostridia	Firmicutes	Bacteria	NC_014377.1	WP_013275572.1	D	D-1	TOCE_RS03795	>TOCE_RS03795(COG1151)	>TOCE_RS03800(COG1051)
GCF_000144645.1_ASM14464v1_genomic.gff	-	555079	Thermosediminibacter oceani DSM 16646	Thermosediminibacter oceani	Thermosediminibacter	Thermoanaerobacterales Family III. Incertae Sedis	Thermoanaerobacterales	Clostridia	Firmicutes	Bacteria	NC_014377.1	WP_013275607.1	E	E-3	TOCE_RS03995	<TOCE_RS03970(COG3894)	>TOCE_RS03975(COG1410)	<TOCE_RS03980(COG3894)	>TOCE_RS03985(COG1228)	>TOCE_RS03990(COG1142)	>TOCE_RS03995(COG1151)	>TOCE_RS04000(COG3640)	>TOCE_RS04005(COG2759)	>TOCE_RS04010(COG1810)	>TOCE_RS04015(COG3404)	>TOCE_RS04020(COG0190)	>TOCE_RS04025	>TOCE_RS04030(COG0685)	>TOCE_RS04035(COG1249)	>TOCE_RS04040(COG3640)	>TOCE_RS04045(COG2069)	>TOCE_RS04050(COG1456)	>TOCE_RS04055(COG1410)	>TOCE_RS04060(COG1614)	>TOCE_RS04065(COG0509)	>TOCE_RS04070(COG3894)
GCF_000144695.1_ASM14469v1_genomic.gff	-	574087	Acetohalobium arabaticum DSM 5501	Acetohalobium arabaticum	Acetohalobium	Halobacteroidaceae	Halanaerobiales	Clostridia	Firmicutes	Bacteria	NC_014378.1	WP_013277958.1	E	E-1	acear_RS05180	>acear_RS05165(COG1454)	>acear_RS05170(COG1905)	>acear_RS05175(COG1894)	>acear_RS05180(COG1151)	>acear_RS05185(COG0437)	>acear_RS05190(COG1034)	>acear_RS05195(COG3640)	>acear_RS05200	>acear_RS05205	>acear_RS05210	>acear_RS05220	>acear_RS05225(COG0796)	>acear_RS05230
GCF_000144695.1_ASM14469v1_genomic.gff	-	574087	Acetohalobium arabaticum DSM 5501	Acetohalobium arabaticum	Acetohalobium	Halobacteroidaceae	Halanaerobiales	Clostridia	Firmicutes	Bacteria	NC_014378.1	WP_013278264.1	F	F-1	acear_RS06735	<acear_RS06695	<acear_RS06700(COG1615)	<acear_RS06705(COG1410)	<acear_RS06710(COG2069)	<acear_RS06715(COG3640)	<acear_RS06720(COG3894)	<acear_RS06725(COG1456)	<acear_RS06730(COG1614)	<acear_RS06735(COG1151)	<acear_RS06740(COG3640)	<acear_RS06745	<acear_RS06750(COG2199)
GCF_000145275.1_ASM14527v1_genomic.gff	-	573061	Clostridium cellulovorans 743B	Clostridium cellulovorans	Clostridium	Clostridiaceae	Clostridiales	Clostridia	Firmicutes	Bacteria	NC_014393.1	WP_010075088.1	B	B-1	CLOCEL_RS01945	>CLOCEL_RS01925(COG1876)	>CLOCEL_RS01930(COG0715)	>CLOCEL_RS01935(COG0600)	>CLOCEL_RS01940(COG1116)	>CLOCEL_RS01945(COG1151)
GCF_000145275.1_ASM14527v1_genomic.gff	-	573061	Clostridium cellulovorans 743B	Clostridium cellulovorans	Clostridium	Clostridiaceae	Clostridiales	Clostridia	Firmicutes	Bacteria	NC_014393.1	WP_010077532.1	D	D-1	CLOCEL_RS07635	<CLOCEL_RS07635(COG1151)
GCF_000145275.1_ASM14527v1_genomic.gff	-	573061	Clostridium cellulovorans 743B	Clostridium cellulovorans	Clostridium	Clostridiaceae	Clostridiales	Clostridia	Firmicutes	Bacteria	NC_014393.1	WP_010075557.1	E	E-1	CLOCEL_RS12905	>CLOCEL_RS12885(COG1905)	<CLOCEL_RS12890(COG3640)	<CLOCEL_RS12895(COG1034)	<CLOCEL_RS12900(COG0437)	<CLOCEL_RS12905(COG1151)	<CLOCEL_RS12910(COG1894)
GCF_000145275.1_ASM14527v1_genomic.gff	-	573061	Clostridium cellulovorans 743B	Clostridium cellulovorans	Clostridium	Clostridiaceae	Clostridiales	Clostridia	Firmicutes	Bacteria	NC_014393.1	WP_010074245.1	C	C-1	CLOCEL_RS21120	>CLOCEL_RS21120(COG1151)
GCF_000145295.1_ASM14529v1_genomic.gff	-	79929	Methanothermobacter marburgensis str. Marburg	Methanothermobacter marburgensis	Methanothermobacter	Methanobacteriaceae	Methanobacteriales	Methanobacteria	Euryarchaeota	Archaea	NC_014408.1	WP_048901164.1	A	A-1	MTBMA_RS01410	>MTBMA_RS01410(COG1152)	>MTBMA_RS01415(COG1880)	>MTBMA_RS01420(COG1614)	>MTBMA_RS01425(COG3640)	>MTBMA_RS01430(COG2069)	>MTBMA_RS01435(COG1456)	>MTBMA_RS01440(COG1142)
GCF_000147875.1_ASM14787v1_genomic.gff	-	679926	Methanolacinia petrolearia DSM 11571	Methanolacinia petrolearia	Methanolacinia	Methanomicrobiaceae	Methanomicrobiales	Methanomicrobia	Euryarchaeota	Archaea	NC_014507.1	WP_013328853.1	E	E-2	MPET_RS04630	>MPET_RS04630(COG1151)	>MPET_RS04635(COG3640)	<MPET_RS04640(COG0474)
GCF_000151105.2_ASM15110v2_genomic.gff	-	391623	Thermococcus barophilus MP	Thermococcus barophilus	Thermococcus	Thermococcaceae	Thermococcales	Thermococci	Euryarchaeota	Archaea	NC_014804.1	WP_013467427.1	E	E-1	TERMP_RS05750	<TERMP_RS05675(COG1363)	<TERMP_RS05680(COG0651)	<TERMP_RS05685(COG1863)	<TERMP_RS05690(COG1006)	<TERMP_RS05695(COG2111)	<TERMP_RS05700	<TERMP_RS05705(COG1320)	<TERMP_RS05710	<TERMP_RS05715(COG3260)	<TERMP_RS05720(COG1143)	<TERMP_RS05725(COG3261)	<TERMP_RS05730(COG0650)	<TERMP_RS05735(COG0651)	<TERMP_RS05740	<TERMP_RS05745(COG3640)	<TERMP_RS05750(COG1151)	<TERMP_RS05755(COG0437)	<TERMP_RS05760(COG2005)	<TERMP_RS11280(COG1719)
GCF_000151205.2_ASM15120v2_genomic.gff	-	246969	Thermococcus sp. AM4	Thermococcus sp. AM4	Thermococcus	Thermococcaceae	Thermococcales	Thermococci	Euryarchaeota	Archaea	NC_016051.1	WP_014121341.1	E	E-1	TAM4_RS00840	<TAM4_RS00830(COG3640)	>TAM4_RS00835(COG0437)	>TAM4_RS00840(COG1151)	>TAM4_RS00845(COG1149)	>TAM4_RS00850(COG0493)	>TAM4_RS00855(COG0437)	>TAM4_RS00860(COG0680)	>TAM4_RS00865(COG1433)	>TAM4_RS00870(COG1275)
GCF_000151205.2_ASM15120v2_genomic.gff	-	246969	Thermococcus sp. AM4	Thermococcus sp. AM4	Thermococcus	Thermococcaceae	Thermococcales	Thermococci	Euryarchaeota	Archaea	NC_016051.1	WP_014123107.1	E	E-1	TAM4_RS10000	<TAM4_RS09925(COG0651)	<TAM4_RS09930(COG1863)	<TAM4_RS09935(COG1006)	<TAM4_RS09940(COG2111)	<TAM4_RS09945	<TAM4_RS09950(COG1320)	<TAM4_RS09955(COG2212)	<TAM4_RS09960(COG3260)	<TAM4_RS09965(COG1143)	<TAM4_RS09970(COG3261)	<TAM4_RS09975(COG0650)	<TAM4_RS09980(COG0651)	<TAM4_RS09985	<TAM4_RS09990	<TAM4_RS09995(COG3640)	<TAM4_RS10000(COG1151)	<TAM4_RS10005(COG0437)	<TAM4_RS10010(COG2005)	<TAM4_RS10015(COG1719)	<TAM4_RS10020	<TAM4_RS10025
GCF_000152245.2_ASM15224v2_genomic.gff	-	903814	Eubacterium limosum KIST612	Eubacterium limosum	Eubacterium	Eubacteriaceae	Clostridiales	Clostridia	Firmicutes	Bacteria	NC_014624.2	WP_013381868.1	E	E-1	ELI_RS16165	<ELI_RS16085(COG0250)	<ELI_RS21065(COG0690)	<ELI_RS16095(COG0267)	<ELI_RS16100(COG1247)	<ELI_RS16105	<ELI_RS16110	<ELI_RS16115(COG2084)	<ELI_RS16125	<ELI_RS16130(COG1876)	<ELI_RS16135	<ELI_RS16140	<ELI_RS16145	<ELI_RS16150	<ELI_RS16155(COG1614)	<ELI_RS16160(COG3640)	<ELI_RS16165(COG1151)	<ELI_RS16170(COG1410)	<ELI_RS16175(COG1456)	<ELI_RS16180(COG2069)
GCF_000153905.1_ASM15390v1_genomic.gff	-	411459	Blautia obeum ATCC 29174	Blautia obeum	Blautia	Lachnospiraceae	Clostridiales	Clostridia	Firmicutes	Bacteria	NZ_DS264319.1	WP_005425377.1	E	E-1	RUMOBE_RS09415	<RUMOBE_RS09370(COG2759)	<RUMOBE_RS09375	<RUMOBE_RS09380(COG3894)	<RUMOBE_RS09385(COG1410)	<RUMOBE_RS09390(COG1456)	<RUMOBE_RS09395(COG2069)	<RUMOBE_RS09400(COG1614)	<RUMOBE_RS09405(COG1614)	<RUMOBE_RS09410(COG3640)	<RUMOBE_RS09415(COG1151)	<RUMOBE_RS09420(COG3640)	<RUMOBE_RS09425(COG1532)	<RUMOBE_RS09430
GCF_000153925.1_ASM15392v1_genomic.gff	-	411460	Ruminococcus torques ATCC 27756	[Ruminococcus] torques	Blautia	Lachnospiraceae	Clostridiales	Clostridia	Firmicutes	Bacteria	NZ_DS264345.1	WP_004845398.1	C	C-1	RUMTOR_RS02110	>RUMTOR_RS02100(COG1362)	>RUMTOR_RS02105(COG1959)	>RUMTOR_RS02110(COG1151)	>RUMTOR_RS02115(COG0437)	>RUMTOR_RS02120(COG1251)	>RUMTOR_RS02125(COG0574)
GCF_000154445.1_ASM15444v1_genomic.gff	-	445973	Intestinibacter bartlettii DSM 16795	Intestinibacter bartlettii	Intestinibacter	Peptostreptococcaceae	Clostridiales	Clostridia	Firmicutes	Bacteria	NZ_DS499562.1	WP_039905386.1	C	C-1	CLOBAR_RS03460	<CLOBAR_RS03450(COG1251)	<CLOBAR_RS03455(COG0437)	<CLOBAR_RS03460(COG1151)	>CLOBAR_RS03465(COG1143)
GCF_000154445.1_ASM15444v1_genomic.gff	-	445973	Intestinibacter bartlettii DSM 16795	Intestinibacter bartlettii	Intestinibacter	Peptostreptococcaceae	Clostridiales	Clostridia	Firmicutes	Bacteria	NZ_DS499564.1	WP_007286371.1	E	E-1	CLOBAR_RS06175	<CLOBAR_RS06155(COG0190)	<CLOBAR_RS06160(COG3404)	<CLOBAR_RS06165	<CLOBAR_RS06170(COG3640)	<CLOBAR_RS06175(COG1151)
GCF_000155085.1_ASM15508v1_genomic.gff	-	471871	Clostridium sporogenes ATCC 15579	Clostridium sporogenes	Clostridium	Clostridiaceae	Clostridiales	Clostridia	Firmicutes	Bacteria	NZ_DS981517.1	WP_003485146.1	D	D-1	CLOSPO_RS06980	<CLOSPO_RS06970(COG0378)	<CLOSPO_RS06975(COG0375)	>CLOSPO_RS06980(COG1151)	>CLOSPO_RS06985(COG1063)
GCF_000155085.1_ASM15508v1_genomic.gff	-	471871	Clostridium sporogenes ATCC 15579	Clostridium sporogenes	Clostridium	Clostridiaceae	Clostridiales	Clostridia	Firmicutes	Bacteria	NZ_DS981517.1	WP_003486817.1	C	C-1	CLOSPO_RS11345	<CLOSPO_RS11335(COG1251)	<CLOSPO_RS11340(COG0437)	<CLOSPO_RS11345(COG1151)	<CLOSPO_RS11350(COG1959)
GCF_000155435.1_ASM15543v1_genomic.gff	-	457421	Clostridiales bacterium 1_7_47FAA	Clostridiales bacterium 1_7_47FAA	unclassified Clostridiales	unclassified Clostridiales	Clostridiales	Clostridia	Firmicutes	Bacteria	NZ_DS990260.1	WP_008717600.1	C	C-1	CBFG_RS04515	<CBFG_RS04505(COG1251)	<CBFG_RS04510(COG0437)	<CBFG_RS04515(COG1151)	<CBFG_RS04520(COG1959)	<CBFG_RS04525	<CBFG_RS29900	<CBFG_RS29905(COG0262)	<CBFG_RS04530(COG0456)	<CBFG_RS04535(COG1670)	<CBFG_RS29910	<CBFG_RS29915	<CBFG_RS04550	<CBFG_RS04555(COG0350)	<CBFG_RS04560(COG1418)	<CBFG_RS04565(COG4948)	<CBFG_RS04570
GCF_000155955.1_ASM15595v1_genomic.gff	-	500635	Mitsuokella multacida DSM 20544	Mitsuokella multacida	Mitsuokella	Selenomonadaceae	Selenomonadales	Negativicutes	Firmicutes	Bacteria	NZ_GG697142.2	WP_071599953.1	B	B-1	MITSMUL_RS10570	>MITSMUL_RS10545(COG1869)	>MITSMUL_RS10550(COG1609)	>MITSMUL_RS10555(COG0524)	>MITSMUL_RS10560(COG0738)	>MITSMUL_RS10565(COG2223)	>MITSMUL_RS10570(COG1151)	>MITSMUL_RS10575	>MITSMUL_RS10580(COG0726)	>MITSMUL_RS10585(COG2199)	>MITSMUL_RS10590	>MITSMUL_RS10595
GCF_000156035.2_ASM15603v2_genomic.gff	-	500632	Tyzzerella nexilis DSM 1787	Tyzzerella nexilis	Tyzzerella	Lachnospiraceae	Clostridiales	Clostridia	Firmicutes	Bacteria	NZ_DS995344.1	WP_004613474.1	C	C-1	CLONEX_RS11435	<CLONEX_RS11425(COG1251)	<CLONEX_RS11430(COG0437)	<CLONEX_RS11435(COG1151)	<CLONEX_RS11440(COG1959)	<CLONEX_RS11445(COG1502)
GCF_000156055.1_ASM15605v1_genomic.gff	-	500633	[Clostridium] hiranonis DSM 13275	[Clostridium] hiranonis	unclassified Peptostreptococcaceae	Peptostreptococcaceae	Clostridiales	Clostridia	Firmicutes	Bacteria	NZ_DS995356.1	WP_006439674.1	C	C-1	CLOHIR_RS03615	>CLOHIR_RS03610(COG1959)	>CLOHIR_RS03615(COG1151)	>CLOHIR_RS03620(COG0437)	>CLOHIR_RS03625(COG1251)
GCF_000156275.2_ASM15627v2_genomic.gff	-	391606	Caldanaerobacter subterraneus subsp. pacificus DSM 12653	Caldanaerobacter subterraneus	Caldanaerobacter	Thermoanaerobacteraceae	Thermoanaerobacterales	Clostridia	Firmicutes	Bacteria	NZ_ABXP02000082.1	WP_009610668.1	E	E-1	CDSM653_RS07355	<CDSM653_RS07300(COG0680)	<CDSM653_RS07305	<CDSM653_RS07310(COG3260)	<CDSM653_RS07315(COG1143)	<CDSM653_RS07320(COG3261)	<CDSM653_RS07325(COG1009)	<CDSM653_RS07330(COG0651)	<CDSM653_RS07335(COG4237)	<CDSM653_RS07340(COG0650)	<CDSM653_RS07345(COG0651)	<CDSM653_RS07350(COG1142)	<CDSM653_RS07355(COG1151)
GCF_000156515.1_ASM15651v1_genomic.gff	-	553973	[Clostridium] hylemonae DSM 15053	[Clostridium] hylemonae	Lachnoclostridium	Lachnospiraceae	Clostridiales	Clostridia	Firmicutes	Bacteria	NZ_GG657760.1	WP_040435806.1	C	C-1	CLOHYLEM_RS14675	<CLOHYLEM_RS14665(COG1251)	<CLOHYLEM_RS14670(COG0437)	<CLOHYLEM_RS14675(COG1151)	<CLOHYLEM_RS14680(COG1959)	<CLOHYLEM_RS14685(COG0281)	<CLOHYLEM_RS14690(COG1172)
GCF_000156675.1_ASM15667v1_genomic.gff	-	537007	Blautia hansenii DSM 20583	Blautia hansenii	Blautia	Lachnospiraceae	Clostridiales	Clostridia	Firmicutes	Bacteria	NZ_GG698588.1	WP_004222259.1	C	C-1	BLAHAN_RS04185	<BLAHAN_RS04175(COG1251)	<BLAHAN_RS04180(COG0437)	<BLAHAN_RS04185(COG1151)	<BLAHAN_RS04190(COG0714)	<BLAHAN_RS04195(COG3864)	<BLAHAN_RS04200	<BLAHAN_RS04205(COG1686)	<BLAHAN_RS04210(COG1386)	<BLAHAN_RS04215(COG1354)	<BLAHAN_RS04220(COG1408)	<BLAHAN_RS04225(COG1686)	<BLAHAN_RS04230(COG4905)	<BLAHAN_RS04235(COG1502)	<BLAHAN_RS04240(COG0828)	<BLAHAN_RS04245(COG0013)
GCF_000156675.1_ASM15667v1_genomic.gff	-	537007	Blautia hansenii DSM 20583	Blautia hansenii	Blautia	Lachnospiraceae	Clostridiales	Clostridia	Firmicutes	Bacteria	NZ_GG698589.1	WP_003021398.1	E	E-1	BLAHAN_RS08225	>BLAHAN_RS08205	>BLAHAN_RS08210	>BLAHAN_RS08215(COG0685)	>BLAHAN_RS08220(COG3640)	>BLAHAN_RS08225(COG1151)	>BLAHAN_RS08230(COG3640)	>BLAHAN_RS08235(COG1614)	>BLAHAN_RS08240(COG2069)	>BLAHAN_RS08245(COG1456)	>BLAHAN_RS08250(COG1410)	>BLAHAN_RS08255	>BLAHAN_RS08260	>BLAHAN_RS08265	>BLAHAN_RS08270	>BLAHAN_RS08275(COG2759)	>BLAHAN_RS08280(COG3404)	>BLAHAN_RS08285(COG0190)
GCF_000157975.1_ASM15797v1_genomic.gff	-	476272	Blautia hydrogenotrophica DSM 10507	Blautia hydrogenotrophica	Blautia	Lachnospiraceae	Clostridiales	Clostridia	Firmicutes	Bacteria	NZ_GG657679.1	WP_005945329.1	E	E-1	RUMHYD_RS01395	>RUMHYD_RS01390(COG3640)	>RUMHYD_RS01395(COG1151)	>RUMHYD_RS01400(COG3640)	>RUMHYD_RS01405(COG1614)	>RUMHYD_RS01410(COG1614)	>RUMHYD_RS01415(COG2069)	>RUMHYD_RS01420(COG1456)	>RUMHYD_RS01425(COG1410)	>RUMHYD_RS01430(COG3894)
GCF_000157975.1_ASM15797v1_genomic.gff	-	476272	Blautia hydrogenotrophica DSM 10507	Blautia hydrogenotrophica	Blautia	Lachnospiraceae	Clostridiales	Clostridia	Firmicutes	Bacteria	NZ_GG657685.1	WP_021845384.1	C	C-1	RUMHYD_RS10725	>RUMHYD_RS10715(COG1925)	>RUMHYD_RS10720(COG1199)	>RUMHYD_RS10725(COG1151)	>RUMHYD_RS10730(COG0437)	>RUMHYD_RS10735(COG1251)	>RUMHYD_RS10740(COG2367)
GCF_000157975.1_ASM15797v1_genomic.gff	-	476272	Blautia hydrogenotrophica DSM 10507	Blautia hydrogenotrophica	Blautia	Lachnospiraceae	Clostridiales	Clostridia	Firmicutes	Bacteria	NZ_GG657688.1	WP_005951682.1	E	E-1	RUMHYD_RS15040	<RUMHYD_RS15025(COG1172)	<RUMHYD_RS15030(COG1879)	<RUMHYD_RS15035(COG1614)	<RUMHYD_RS15040(COG1151)
GCF_000158075.1_ASM15807v1_genomic.gff	-	518636	[Clostridium] asparagiforme DSM 15981	[Clostridium] asparagiforme	Lachnoclostridium	Lachnospiraceae	Clostridiales	Clostridia	Firmicutes	Bacteria	NZ_GG657592.1	WP_040412281.1	C	C-1	CLOSTASPAR_RS23330	<CLOSTASPAR_RS23310(COG0531)	<CLOSTASPAR_RS23315(COG1168)	>CLOSTASPAR_RS23320(COG0583)	>CLOSTASPAR_RS23325(COG1959)	>CLOSTASPAR_RS23330(COG1151)	>CLOSTASPAR_RS23335(COG0437)	>CLOSTASPAR_RS23340(COG1251)
GCF_000159975.2_Ruminococus_sp_5_1_39B_FAA_V2_genomic.gff	-	457412	Ruminococcus sp. 5_1_39BFAA	Ruminococcus sp. 5_1_39BFAA	Ruminococcus	Ruminococcaceae	Clostridiales	Clostridia	Firmicutes	Bacteria	NZ_ACII02000003.1	WP_008703889.1	E	E-1	RSAG_RS15750	<RSAG_RS15720(COG3894)	<RSAG_RS15725(COG1410)	<RSAG_RS15730(COG1456)	<RSAG_RS15735(COG2069)	<RSAG_RS15740(COG1614)	<RSAG_RS15745(COG3640)	<RSAG_RS15750(COG1151)	<RSAG_RS15755(COG3640)	<RSAG_RS15760	<RSAG_RS15765
GCF_000160015.1_ASM16001v1_genomic.gff	-	546273	Veillonella dispar ATCC 17748	Veillonella dispar	Veillonella	Veillonellaceae	Veillonellales	Negativicutes	Firmicutes	Bacteria	NZ_GG667605.1	WP_039969522.1	B	B-1	VEIDISOL_RS08645	>VEIDISOL_RS08645(COG1151)
GCF_000160635.1_ASM16063v1_genomic.gff	-	585501	Oribacterium sinus F0268	Oribacterium sinus	Oribacterium	Lachnospiraceae	Clostridiales	Clostridia	Firmicutes	Bacteria	NZ_GG668533.1	WP_007156230.1	B	B-1	HMPREF6123_RS02260	<HMPREF6123_RS02250	<HMPREF6123_RS12135	<HMPREF6123_RS02260(COG1151)
GCF_000163715.1_ASM16371v1_genomic.gff	-	457416	Veillonella sp. 3_1_44	Veillonella sp. 3_1_44	Veillonella	Veillonellaceae	Veillonellales	Negativicutes	Firmicutes	Bacteria	NZ_GG770201.1	WP_008715254.1	B	B-1	HMPREF0873_RS07445	>HMPREF0873_RS07445(COG1151)
GCF_000163735.1_ASM16373v1_genomic.gff	-	450749	Veillonella sp. 6_1_27	Veillonella sp. 6_1_27	Veillonella	Veillonellaceae	Veillonellales	Negativicutes	Firmicutes	Bacteria	NZ_GG770217.1	WP_008603075.1	B	B-1	HMPREF0874_RS08325	<HMPREF0874_RS08325(COG1151)
GCF_000166075.1_ASM16607v1_genomic.gff	-	581103	Geobacillus sp. Y4.1MC1	Geobacillus sp. Y4.1MC1	Geobacillus	Bacillaceae	Bacillales	Bacilli	Firmicutes	Bacteria	NC_014650.1	WP_013400775.1	F	F-2	GY4MC1_RS09120	>GY4MC1_RS09115(COG3640)	>GY4MC1_RS09120(COG1151)	>GY4MC1_RS09125(COG1142)	>GY4MC1_RS09130(COG0651)	>GY4MC1_RS09135(COG0650)	>GY4MC1_RS09140(COG4237)	>GY4MC1_RS09145(COG0651)	>GY4MC1_RS09150(COG1009)	>GY4MC1_RS09155(COG3261)	>GY4MC1_RS09160(COG1143)	>GY4MC1_RS09165(COG3260)	>GY4MC1_RS09170	>GY4MC1_RS09175(COG0680)	>GY4MC1_RS09180(COG0375)	>GY4MC1_RS09185(COG0378)
GCF_000166095.1_ASM16609v1_genomic.gff	-	523846	Methanothermus fervidus DSM 2088	Methanothermus fervidus	Methanothermus	Methanothermaceae	Methanobacteriales	Methanobacteria	Euryarchaeota	Archaea	NC_014658.1	WP_013413605.1	A	A-1	MFER_RS02675	<MFER_RS02650(COG1456)	<MFER_RS02655(COG2069)	<MFER_RS02660(COG3640)	<MFER_RS02665(COG1614)	<MFER_RS02670(COG1880)	<MFER_RS02675(COG1152)
GCF_000166355.1_ASM16635v1_genomic.gff	-	632292	Caldicellulosiruptor hydrothermalis 108	Caldicellulosiruptor hydrothermalis	Caldicellulosiruptor	Thermoanaerobacterales Family III. Incertae Sedis	Thermoanaerobacterales	Clostridia	Firmicutes	Bacteria	NC_014652.1	WP_013402205.1	C	C-1	CALHY_RS01230	>CALHY_RS01220(COG1305)	>CALHY_RS13360	>CALHY_RS01225(COG1959)	>CALHY_RS01230(COG1151)	>CALHY_RS01235(COG0437)	>CALHY_RS01240(COG1251)	>CALHY_RS01245	<CALHY_RS01250(COG2207)	>CALHY_RS01255(COG1454)
GCF_000166695.1_ASM16669v1_genomic.gff	-	632335	Caldicellulosiruptor kristjanssonii I77R1B	Caldicellulosiruptor kristjanssonii	Caldicellulosiruptor	Thermoanaerobacterales Family III. Incertae Sedis	Thermoanaerobacterales	Clostridia	Firmicutes	Bacteria	NC_014721.1	WP_013431596.1	C	C-2	CALKR_RS00885	>CALKR_RS00870(COG1775)	>CALKR_RS00875(COG1924)	>CALKR_RS00880(COG1959)	>CALKR_RS00885(COG1151)	>CALKR_RS00890(COG0437)	>CALKR_RS00895(COG1251)	>CALKR_RS00900(COG1846)	>CALKR_RS00905(COG1132)	>CALKR_RS00910(COG1132)
GCF_000168275.1_ASM16827v1_genomic.gff	-	262489	delta proteobacterium MLMS-1	delta proteobacterium MLMS-1	unclassified Deltaproteobacteria	unclassified Deltaproteobacteria	unclassified Deltaproteobacteria	Deltaproteobacteria	Proteobacteria	Bacteria	NZ_AAQF01000022.1	WP_007291784.1	E	E-3	MLDDRAFT_RS05705	<MLDDRAFT_RS05665	<MLDDRAFT_RS05670(COG1148)	<MLDDRAFT_RS31180(COG3383)	<MLDDRAFT_RS05690(COG1456)	<MLDDRAFT_RS05695(COG1614)	<MLDDRAFT_RS05700(COG2069)	<MLDDRAFT_RS05705(COG1151)	<MLDDRAFT_RS05710(COG0190)
GCF_000168275.1_ASM16827v1_genomic.gff	-	262489	delta proteobacterium MLMS-1	delta proteobacterium MLMS-1	unclassified Deltaproteobacteria	unclassified Deltaproteobacteria	unclassified Deltaproteobacteria	Deltaproteobacteria	Proteobacteria	Bacteria	NZ_AAQF01000026.1	WP_040868104.1	E	E-2	MLDDRAFT_RS06355	<MLDDRAFT_RS06355(COG1151)
GCF_000168275.1_ASM16827v1_genomic.gff	-	262489	delta proteobacterium MLMS-1	delta proteobacterium MLMS-1	unclassified Deltaproteobacteria	unclassified Deltaproteobacteria	unclassified Deltaproteobacteria	Deltaproteobacteria	Proteobacteria	Bacteria	NZ_AAQF01000214.1	WP_007294540.1	E	E-3	MLDDRAFT_RS22100	>MLDDRAFT_RS22095(COG0190)	>MLDDRAFT_RS22100(COG1151)	>MLDDRAFT_RS22105(COG2069)	>MLDDRAFT_RS22110
GCF_000168275.1_ASM16827v1_genomic.gff	-	262489	delta proteobacterium MLMS-1	delta proteobacterium MLMS-1	unclassified Deltaproteobacteria	unclassified Deltaproteobacteria	unclassified Deltaproteobacteria	Deltaproteobacteria	Proteobacteria	Bacteria	NZ_AAQF01000268.1	WP_040870675.1	E	E-2	MLDDRAFT_RS24075	<MLDDRAFT_RS24075(COG1151)
GCF_000168275.1_ASM16827v1_genomic.gff	-	262489	delta proteobacterium MLMS-1	delta proteobacterium MLMS-1	unclassified Deltaproteobacteria	unclassified Deltaproteobacteria	unclassified Deltaproteobacteria	Deltaproteobacteria	Proteobacteria	Bacteria	NZ_AAQF01000441.1	WP_007294540.1	E	E-3	MLDDRAFT_RS27885	>MLDDRAFT_RS27880	>MLDDRAFT_RS27885(COG1151)	>MLDDRAFT_RS27890
GCF_000169155.1_ASM16915v1_genomic.gff	-	401526	Thermosinus carboxydivorans Nor1	Thermosinus carboxydivorans	Thermosinus	Sporomusaceae	Selenomonadales	Negativicutes	Firmicutes	Bacteria	NZ_AAWL01000004.1	WP_007288856.1	F	F-1	TCARDRAFT_RS04635	<TCARDRAFT_RS04625(COG1028)	<TCARDRAFT_RS04630(COG3640)	<TCARDRAFT_RS04635(COG1151)	<TCARDRAFT_RS04640(COG1142)	<TCARDRAFT_RS04645(COG0375)	<TCARDRAFT_RS04650(COG3261)	<TCARDRAFT_RS04655(COG0852)	<TCARDRAFT_RS04660(COG1143)	<TCARDRAFT_RS04665(COG3260)	<TCARDRAFT_RS04670(COG0650)	<TCARDRAFT_RS04675(COG0651)
GCF_000169155.1_ASM16915v1_genomic.gff	-	401526	Thermosinus carboxydivorans Nor1	Thermosinus carboxydivorans	Thermosinus	Sporomusaceae	Selenomonadales	Negativicutes	Firmicutes	Bacteria	NZ_AAWL01000007.1	WP_007289280.1	D	D-1	TCARDRAFT_RS06875	<TCARDRAFT_RS06875(COG1151)
GCF_000169475.1_ASM16947v1_genomic.gff	-	411470	Ruminococcus gnavus ATCC 29149	[Ruminococcus] gnavus	Blautia	Lachnospiraceae	Clostridiales	Clostridia	Firmicutes	Bacteria	NZ_AAYG02000013.1	WP_039959655.1	C	C-1	RUMGNA_RS07710	<RUMGNA_RS07700(COG1609)	>RUMGNA_RS07705(COG1959)	>RUMGNA_RS07710(COG1151)	>RUMGNA_RS07715(COG0437)	>RUMGNA_RS07720(COG1251)
GCF_000171075.1_ASM17107v1_genomic.gff	-	445336	Clostridium botulinum Bf	Clostridium botulinum	Clostridium	Clostridiaceae	Clostridiales	Clostridia	Firmicutes	Bacteria	NZ_ABDP01000016.1	WP_004442105.1	C	C-1	CBB_RS05305	<CBB_RS05315(COG1251)	<CBB_RS05310(COG0437)	<CBB_RS05305(COG1151)	<CBB_RS05300(COG1959)	<CBB_RS05295	<CBB_RS19965	<CBB_RS20690	<CBB_RS05290(COG0020)
GCF_000171095.1_ASM17109v1_genomic.gff	-	445337	Clostridium botulinum C str. Eklund	Clostridium botulinum	Clostridium	Clostridiaceae	Clostridiales	Clostridia	Firmicutes	Bacteria	NZ_ABDQ01000002.1	WP_003364534.1	C	C-1	CBC_RS02110	<CBC_RS02110(COG1151)	<CBC_RS02115(COG1959)
GCF_000173015.1_ASM17301v1_genomic.gff	-	492476	Ruminiclostridium thermocellum JW20	Ruminiclostridium thermocellum	Ruminiclostridium	Ruminococcaceae	Clostridiales	Clostridia	Firmicutes	Bacteria	NZ_ABVG02000005.1	WP_003514461.1	B	B-1	CTHER_RS14425	>CTHER_RS14350(COG3894)	>CTHER_RS14355(COG4887)	>CTHER_RS14360(COG0715)	>CTHER_RS14365(COG1116)	>CTHER_RS14370(COG0600)	>CTHER_RS14375(COG1541)	>CTHER_RS14380(COG0436)	>CTHER_RS14385(COG1014)	>CTHER_RS14390(COG1144)	>CTHER_RS14395(COG0674)	>CTHER_RS14400(COG1013)	>CTHER_RS14405	>CTHER_RS14410(COG0251)	>CTHER_RS14415(COG0626)	>CTHER_RS14420(COG1168)	>CTHER_RS14425(COG1151)	>CTHER_RS14430(COG0715)	>CTHER_RS14435(COG0600)	>CTHER_RS14440(COG1116)
GCF_000173815.1_ASM17381v1_genomic.gff	-	478749	Marvinbryantia formatexigens DSM 14469	Marvinbryantia formatexigens	Marvinbryantia	Lachnospiraceae	Clostridiales	Clostridia	Firmicutes	Bacteria	NZ_ACCL02000005.1	WP_040782480.1	E	E-1	BRYFOR_RS05765	<BRYFOR_RS05755(COG1614)	<BRYFOR_RS05760(COG3640)	<BRYFOR_RS05765(COG1151)	<BRYFOR_RS05770(COG3640)	<BRYFOR_RS05775	<BRYFOR_RS05780	<BRYFOR_RS05785(COG1101)	<BRYFOR_RS05790(COG4120)	<BRYFOR_RS05795(COG2984)	<BRYFOR_RS05800(COG0240)	<BRYFOR_RS05805(COG0344)	<BRYFOR_RS05810(COG1160)	<BRYFOR_RS05815(COG1625)
GCF_000173815.1_ASM17381v1_genomic.gff	-	478749	Marvinbryantia formatexigens DSM 14469	Marvinbryantia formatexigens	Marvinbryantia	Lachnospiraceae	Clostridiales	Clostridia	Firmicutes	Bacteria	NZ_ACCL02000020.1	WP_006863528.1	B	B-1	BRYFOR_RS16225	>BRYFOR_RS16225(COG1151)	>BRYFOR_RS16230(COG0715)	>BRYFOR_RS16235(COG0600)	>BRYFOR_RS16240(COG1116)	>BRYFOR_RS16245	>BRYFOR_RS16250	>BRYFOR_RS22520	>BRYFOR_RS16265(COG0480)	>BRYFOR_RS16270(COG0288)	>BRYFOR_RS16275(COG4753)	>BRYFOR_RS16280(COG1408)	>BRYFOR_RS16285(COG0297)	>BRYFOR_RS16290	>BRYFOR_RS16295	>BRYFOR_RS16300	<BRYFOR_RS16305(COG2244)	>BRYFOR_RS16310(COG1959)
GCF_000173975.1_ASM17397v1_genomic.gff	-	411469	[Eubacterium] hallii DSM 3353	[Eubacterium] hallii	Eubacterium	Eubacteriaceae	Clostridiales	Clostridia	Firmicutes	Bacteria	NZ_ACEP01000006.1	WP_044921150.1	C	C-4	EUBHAL_RS00375	>EUBHAL_RS00375(COG1151)	>EUBHAL_RS00380(COG4624)
GCF_000173975.1_ASM17397v1_genomic.gff	-	411469	[Eubacterium] hallii DSM 3353	[Eubacterium] hallii	Eubacterium	Eubacteriaceae	Clostridiales	Clostridia	Firmicutes	Bacteria	NZ_ACEP01000162.1	WP_044923701.1	C	C-4	EUBHAL_RS13855	>EUBHAL_RS13855(COG1151)	>EUBHAL_RS13860(COG4624)	>EUBHAL_RS13865	>EUBHAL_RS13870(COG1225)	>EUBHAL_RS13875(COG3022)	>EUBHAL_RS15555	>EUBHAL_RS13880(COG1853)	>EUBHAL_RS13885(COG1592)	>EUBHAL_RS13890(COG2033)	>EUBHAL_RS13895(COG1773)
GCF_000174415.1_ASM17441v1_genomic.gff	-	555088	Dethiobacter alkaliphilus AHT 1	Dethiobacter alkaliphilus	Dethiobacter	Syntrophomonadaceae	Clostridiales	Clostridia	Firmicutes	Bacteria	NZ_ACJM01000001.1	WP_008513984.1	D	D-2	DEALDRAFT_RS00965	>DEALDRAFT_RS00965(COG1151)	>DEALDRAFT_RS00970	>DEALDRAFT_RS00975(COG3668)
GCF_000174415.1_ASM17441v1_genomic.gff	-	555088	Dethiobacter alkaliphilus AHT 1	Dethiobacter alkaliphilus	Dethiobacter	Syntrophomonadaceae	Clostridiales	Clostridia	Firmicutes	Bacteria	NZ_ACJM01000004.1	WP_008515612.1	F	F-1	DEALDRAFT_RS05475	<DEALDRAFT_RS05380(COG2197)	<DEALDRAFT_RS05385(COG4585)	<DEALDRAFT_RS05390(COG2197)	<DEALDRAFT_RS05395(COG4585)	<DEALDRAFT_RS05400	<DEALDRAFT_RS05405	<DEALDRAFT_RS05410	<DEALDRAFT_RS05415(COG3391)	<DEALDRAFT_RS05420(COG3063)	<DEALDRAFT_RS05425	<DEALDRAFT_RS05430(COG0491)	<DEALDRAFT_RS05435(COG0685)	<DEALDRAFT_RS05440	<DEALDRAFT_RS05445(COG0493)	<DEALDRAFT_RS05450(COG1410)	<DEALDRAFT_RS05455(COG2069)	<DEALDRAFT_RS05460(COG3894)	<DEALDRAFT_RS05465(COG1456)	<DEALDRAFT_RS05470(COG1614)	<DEALDRAFT_RS05475(COG1151)	<DEALDRAFT_RS05480(COG3640)
GCF_000174435.1_ASM17443v1_genomic.gff	-	555779	Desulfonatronospira thiodismutans ASO3-1	Desulfonatronospira thiodismutans	Desulfonatronospira	Desulfohalobiaceae	Desulfovibrionales	Deltaproteobacteria	Proteobacteria	Bacteria	NZ_ACJN02000001.1	WP_008868932.1	E	E-1	DTHIO_RS03290	<DTHIO_RS03210(COG0493)	<DTHIO_RS03215(COG1410)	<DTHIO_RS03220(COG3640)	<DTHIO_RS03225(COG1456)	<DTHIO_RS03230(COG2069)	<DTHIO_RS03235(COG0190)	<DTHIO_RS03240(COG0664)	<DTHIO_RS20310(COG3383)	<DTHIO_RS03255(COG1894)	<DTHIO_RS03260(COG1905)	<DTHIO_RS03265(COG3383)	<DTHIO_RS03270(COG1149)	<DTHIO_RS03275(COG2905)	<DTHIO_RS03280(COG1894)	<DTHIO_RS03285(COG1905)	<DTHIO_RS03290(COG1151)	<DTHIO_RS03295(COG1614)	<DTHIO_RS03300(COG3640)	<DTHIO_RS03305(COG3894)
GCF_000174435.1_ASM17443v1_genomic.gff	-	555779	Desulfonatronospira thiodismutans ASO3-1	Desulfonatronospira thiodismutans	Desulfonatronospira	Desulfohalobiaceae	Desulfovibrionales	Deltaproteobacteria	Proteobacteria	Bacteria	NZ_ACJN02000003.1	WP_008871393.1	E	E-2	DTHIO_RS16460	<DTHIO_RS16460(COG1151)
GCF_000174895.1_ASM17489v1_genomic.gff	-	641112	Ruminococcus flavefaciens FD-1	Ruminococcus flavefaciens	Ruminococcus	Ruminococcaceae	Clostridiales	Clostridia	Firmicutes	Bacteria	NZ_ACOK01000117.1	WP_009987813.1	B	B-1	RUMFLAFD1_RS0119670	<RUMFLAFD1_RS0119660	<RUMFLAFD1_RS0119665	<RUMFLAFD1_RS0119670(COG1151)	<RUMFLAFD1_RS0119675(COG1116)	<RUMFLAFD1_RS0119680(COG0600)	<RUMFLAFD1_RS23890	>RUMFLAFD1_RS0119705(COG1175)	>RUMFLAFD1_RS0119710(COG0395)
GCF_000175595.1_ASM17559v1_genomic.gff	-	536227	Clostridium carboxidivorans P7	Clostridium carboxidivorans	Clostridium	Clostridiaceae	Clostridiales	Clostridia	Firmicutes	Bacteria	NZ_ACVI01000002.1	WP_007059049.1	E	others	CCARBDRAFT_RS00795	<CCARBDRAFT_RS00795(COG1151)
GCF_000175595.1_ASM17559v1_genomic.gff	-	536227	Clostridium carboxidivorans P7	Clostridium carboxidivorans	Clostridium	Clostridiaceae	Clostridiales	Clostridia	Firmicutes	Bacteria	NZ_ACVI01000003.1	WP_007059226.1	D	D-1	CCARBDRAFT_RS01620	>CCARBDRAFT_RS01620(COG1151)
GCF_000175595.1_ASM17559v1_genomic.gff	-	536227	Clostridium carboxidivorans P7	Clostridium carboxidivorans	Clostridium	Clostridiaceae	Clostridiales	Clostridia	Firmicutes	Bacteria	NZ_ACVI01000023.1	WP_007060641.1	C	C-2	CCARBDRAFT_RS08325	>CCARBDRAFT_RS08325(COG1151)	>CCARBDRAFT_RS08330(COG0437)	>CCARBDRAFT_RS08335(COG1251)
GCF_000175595.1_ASM17559v1_genomic.gff	-	536227	Clostridium carboxidivorans P7	Clostridium carboxidivorans	Clostridium	Clostridiaceae	Clostridiales	Clostridia	Firmicutes	Bacteria	NZ_ACVI01000049.1	WP_007061829.1	E	E-1	CCARBDRAFT_RS13890	>CCARBDRAFT_RS13890(COG1151)	>CCARBDRAFT_RS13895(COG3640)	>CCARBDRAFT_RS13900(COG2759)	>CCARBDRAFT_RS13905(COG3404)	>CCARBDRAFT_RS13910(COG0190)	>CCARBDRAFT_RS13915	>CCARBDRAFT_RS13920(COG0685)	>CCARBDRAFT_RS13925(COG1249)	>CCARBDRAFT_RS13930(COG3640)	>CCARBDRAFT_RS13935(COG2069)	>CCARBDRAFT_RS13940(COG1456)	>CCARBDRAFT_RS13945(COG1410)	>CCARBDRAFT_RS13950(COG1614)	>CCARBDRAFT_RS13955(COG0509)	>CCARBDRAFT_RS13960(COG3894)	>CCARBDRAFT_RS13965
GCF_000175795.2_ASM17579v2_genomic.gff	-	588581	[Clostridium] papyrosolvens DSM 2782	[Clostridium] papyrosolvens	Ruminiclostridium	Ruminococcaceae	Clostridiales	Clostridia	Firmicutes	Bacteria	NZ_ACXX02000012.1	WP_004621036.1	B	B-1	CPAP_RS16035	>CPAP_RS16015(COG1191)	<CPAP_RS16020(COG1116)	<CPAP_RS16025(COG0600)	<CPAP_RS16030(COG0715)	<CPAP_RS16035(COG1151)
GCF_000175795.2_ASM17579v2_genomic.gff	-	588581	[Clostridium] papyrosolvens DSM 2782	[Clostridium] papyrosolvens	Ruminiclostridium	Ruminococcaceae	Clostridiales	Clostridia	Firmicutes	Bacteria	NZ_ACXX02000014.1	WP_004621444.1	D	D-2	CPAP_RS17310	<CPAP_RS17310(COG1151)
GCF_000176915.2_ASM17691v2_genomic.gff	-	643562	Pseudodesulfovibrio aespoeensis Aspo-2	Pseudodesulfovibrio aespoeensis	Pseudodesulfovibrio	Desulfovibrionaceae	Desulfovibrionales	Deltaproteobacteria	Proteobacteria	Bacteria	NC_014844.1	WP_013513485.1	E	E-2	DAES_RS02610	<DAES_RS02605(COG3640)	<DAES_RS02610(COG1151)	<DAES_RS02615(COG0664)	>DAES_RS02620(COG2226)
GCF_000177435.1_ASM17743v1_genomic.gff	-	686660	Veillonella parvula ATCC 17745	Veillonella parvula	Veillonella	Veillonellaceae	Veillonellales	Negativicutes	Firmicutes	Bacteria	NZ_ADFU01000011.1	WP_004694046.1	B	B-1	HMPREF1035_RS03025	<HMPREF1035_RS03025(COG1151)
GCF_000177635.2_ASM17763v2_genomic.gff	-	653733	Desulfurispirillum indicum S5	Desulfurispirillum indicum	Desulfurispirillum	Chrysiogenaceae	Chrysiogenales	Chrysiogenetes	Chrysiogenetes	Bacteria	NC_014836.1	WP_013506612.1	F	F-1	SELIN_RS10345	<SELIN_RS10340(COG3640)	<SELIN_RS10345(COG1151)	<SELIN_RS10350(COG0664)	<SELIN_RS10355(COG2267)
GCF_000178155.2_ASM17815v2_genomic.gff	-	246199	Ruminococcus albus 8	Ruminococcus albus	Ruminococcus	Ruminococcaceae	Clostridiales	Clostridia	Firmicutes	Bacteria	NZ_ADKM02000091.1	WP_002850673.1	B	B-1	CUS_RS10340	<CUS_RS10340(COG1151)	<CUS_RS10345(COG1116)	<CUS_RS10350(COG0600)	<CUS_RS10355(COG0715)
GCF_000179315.1_ASM17931v1_genomic.gff	-	88274	delta proteobacterium NaphS2	delta proteobacterium NaphS2	unclassified Deltaproteobacteria	unclassified Deltaproteobacteria	unclassified Deltaproteobacteria	Deltaproteobacteria	Proteobacteria	Bacteria	NZ_ADZZ01000475.1	WP_006423588.1	E	E-1	NPH_RS21615	<NPH_RS21575(COG0296)	<NPH_RS21580(COG0297)	<NPH_RS21585(COG0058)	<NPH_RS21590(COG3408)	<NPH_RS21595(COG0489)	<NPH_RS21600(COG1410)	<NPH_RS21605(COG1456)	<NPH_RS21610(COG1614)	<NPH_RS21615(COG1151)
GCF_000179315.1_ASM17931v1_genomic.gff	-	88274	delta proteobacterium NaphS2	delta proteobacterium NaphS2	unclassified Deltaproteobacteria	unclassified Deltaproteobacteria	unclassified Deltaproteobacteria	Deltaproteobacteria	Proteobacteria	Bacteria	NZ_ADZZ01000765.1	WP_006425736.1	E	E-2	NPH_RS31810	<NPH_RS31810(COG1151)	<NPH_RS31815(COG0437)	<NPH_RS31820(COG1251)
GCF_000179575.2_ASM17957v2_genomic.gff	-	647113	Methanothermococcus okinawensis IH1	Methanothermococcus okinawensis	Methanothermococcus	Methanococcaceae	Methanococcales	Methanococci	Euryarchaeota	Archaea	NC_015636.1	WP_013866909.1	A	A-1	METOK_RS03810	<METOK_RS03790(COG1614)	<METOK_RS03795(COG1614)	<METOK_RS03800(COG1142)	<METOK_RS03805(COG1880)	<METOK_RS03810(COG1152)
GCF_000179595.2_ASM17959v2_genomic.gff	-	509191	Acetivibrio cellulolyticus CD2	Acetivibrio cellulolyticus	Acetivibrio	Ruminococcaceae	Clostridiales	Clostridia	Firmicutes	Bacteria	NZ_JH556653.1	WP_010245672.1	D	D-1	ACECE_RS0206415	>ACECE_RS0206415(COG1151)
GCF_000179635.2_ASM17963v2_genomic.gff	-	697329	Ruminococcus albus 7 = DSM 20455	Ruminococcus albus	Ruminococcus	Ruminococcaceae	Clostridiales	Clostridia	Firmicutes	Bacteria	NC_014825.1	WP_013483716.1	B	B-1	RUMAL_RS18990	<RUMAL_RS18980	<RUMAL_RS18985	<RUMAL_RS18990(COG1151)	<RUMAL_RS18995(COG1116)	<RUMAL_RS19000(COG0600)	<RUMAL_RS19005(COG0715)
GCF_000179735.1_ASM17973v1_genomic.gff	-	866776	Veillonella atypica ACS-049-V-Sch6	Veillonella atypica	Veillonella	Veillonellaceae	Veillonellales	Negativicutes	Firmicutes	Bacteria	NZ_AEDR01000024.1	WP_005376668.1	B	B-1	HMPREF9321_RS03640	<HMPREF9321_RS03640(COG1151)
GCF_000183525.2_ASM18352v3_genomic.gff	-	633697	[Eubacterium] cellulosolvens 6	[Eubacterium] cellulosolvens	Eubacterium	Eubacteriaceae	Clostridiales	Clostridia	Firmicutes	Bacteria	NZ_CM001487.1	WP_004602705.1	B	B-1	EUBCEDRAFT1_RS03565	<EUBCEDRAFT1_RS03550(COG4828)	<EUBCEDRAFT1_RS03555(COG2116)	<EUBCEDRAFT1_RS03560(COG1918)	<EUBCEDRAFT1_RS03565(COG1151)	<EUBCEDRAFT1_RS03570(COG1116)	<EUBCEDRAFT1_RS03575(COG0600)	<EUBCEDRAFT1_RS03580(COG0715)	<EUBCEDRAFT1_RS03585(COG2873)
GCF_000183625.1_ASM18362v1_genomic.gff	-	879310	Selenomonas sp. oral taxon 137 str. F0430	Selenomonas sp. oral taxon 137	Selenomonas	Selenomonadaceae	Selenomonadales	Negativicutes	Firmicutes	Bacteria	NZ_AENV01000015.1	WP_009439539.1	B	B-1	HMPREF9162_RS10830	<HMPREF9162_RS12260	<HMPREF9162_RS10790(COG2703)	<HMPREF9162_RS10795	<HMPREF9162_RS10800(COG2755)	<HMPREF9162_RS10805(COG1058)	<HMPREF9162_RS10810	<HMPREF9162_RS10815(COG0716)	<HMPREF9162_RS10820	<HMPREF9162_RS10825(COG0300)	<HMPREF9162_RS10830(COG1151)
GCF_000185385.1_ASM18538v1_genomic.gff	-	887325	Lachnoanaerobaculum saburreum DSM 3986	Lachnoanaerobaculum saburreum	Lachnoanaerobaculum	Lachnospiraceae	Clostridiales	Clostridia	Firmicutes	Bacteria	NZ_GL622296.1	WP_040461110.1	B	B-1	HMPREF0381_RS03365	>HMPREF0381_RS03365(COG1151)
GCF_000185505.1_ASM18550v1_genomic.gff	-	887929	Pseudoramibacter alactolyticus ATCC 23263	Pseudoramibacter alactolyticus	Pseudoramibacter	Eubacteriaceae	Clostridiales	Clostridia	Firmicutes	Bacteria	NZ_GL622359.1	WP_006599613.1	B	B-1	HMPREF0721_RS09850	>HMPREF0721_RS09840(COG1309)	>HMPREF0721_RS09850(COG1151)	>HMPREF0721_RS09855(COG0715)	>HMPREF0721_RS09860(COG0600)	>HMPREF0721_RS09865(COG1116)
GCF_000185545.1_ASM18554v1_genomic.gff	-	665951	Lachnospiraceae bacterium 8_1_57FAA	Lachnospiraceae bacterium 8_1_57FAA	unclassified Lachnospiraceae	Lachnospiraceae	Clostridiales	Clostridia	Firmicutes	Bacteria	NZ_GL622460.1	WP_004845398.1	C	C-1	HMPREF1026_RS12825	<HMPREF1026_RS12810(COG0574)	<HMPREF1026_RS12815(COG1251)	<HMPREF1026_RS12820(COG0437)	<HMPREF1026_RS12825(COG1151)	<HMPREF1026_RS12830(COG1959)	<HMPREF1026_RS12835(COG1362)
GCF_000185805.1_ASM18580v1_genomic.gff	-	648996	Thermovibrio ammonificans HB-1	Thermovibrio ammonificans	Thermovibrio	Desulfurobacteriaceae	Desulfurobacteriales	Aquificae	Aquificae	Bacteria	NC_014926.1	WP_013538086.1	D	D-1	THEAM_RS06740	>THEAM_RS06730(COG0664)	<THEAM_RS06735	<THEAM_RS06740(COG1151)
GCF_000187125.1_ASM18712v1_genomic.gff	-	749551	Selenomonas artemidis F0399	Selenomonas artemidis	Selenomonas	Selenomonadaceae	Selenomonadales	Negativicutes	Firmicutes	Bacteria	NZ_GL638155.1	WP_039969769.1	B	B-1	HMPREF9555_RS09260	>HMPREF9555_RS09260(COG1151)	>HMPREF9555_RS09265(COG0300)	>HMPREF9555_RS09270	>HMPREF9555_RS09275(COG0716)	>HMPREF9555_RS09280	>HMPREF9555_RS09285(COG1058)	>HMPREF9555_RS09290(COG2755)	>HMPREF9555_RS09295	>HMPREF9555_RS09300(COG2703)
GCF_000189295.2_ASM18929v2_genomic.gff	-	641491	Desulfovibrio desulfuricans ND132	Desulfovibrio desulfuricans	Desulfovibrio	Desulfovibrionaceae	Desulfovibrionales	Deltaproteobacteria	Proteobacteria	Bacteria	NC_016803.1	WP_014323149.1	E	E-2	DND132_RS12675	>DND132_RS12675(COG1151)	>DND132_RS12680(COG3640)	>DND132_RS12685(COG0840)
GCF_000189755.2_ASM18975v3_genomic.gff	-	696369	Desulfotomaculum nigrificans DSM 574	Desulfotomaculum nigrificans	Desulfotomaculum	Peptococcaceae	Clostridiales	Clostridia	Firmicutes	Bacteria	NZ_KI912183.1	WP_003544498.1	F	F-1	DESNIDRAFT_RS0204360	>DESNIDRAFT_RS0204345	>DESNIDRAFT_RS0204350	>DESNIDRAFT_RS0204355(COG0664)	>DESNIDRAFT_RS0204360(COG1151)	>DESNIDRAFT_RS0204365(COG3640)
GCF_000189755.2_ASM18975v3_genomic.gff	-	696369	Desulfotomaculum nigrificans DSM 574	Desulfotomaculum nigrificans	Desulfotomaculum	Peptococcaceae	Clostridiales	Clostridia	Firmicutes	Bacteria	NZ_KI912183.1	WP_003543884.1	D	D-1	DESNIDRAFT_RS0206775	>DESNIDRAFT_RS0206775(COG1151)
GCF_000190355.1_ASM19035v1_genomic.gff	-	556261	Clostridium sp. D5	Clostridium sp. D5	Clostridium	Clostridiaceae	Clostridiales	Clostridia	Firmicutes	Bacteria	NZ_GL870809.1	WP_009002097.1	C	C-1	HMPREF0240_RS03650	>HMPREF0240_RS03640(COG2207)	>HMPREF0240_RS03645(COG1959)	>HMPREF0240_RS03650(COG1151)	>HMPREF0240_RS03655(COG0437)	>HMPREF0240_RS03660(COG1251)
GCF_000190635.1_ASM19063v1_genomic.gff	-	645991	Syntrophobotulus glycolicus DSM 8271	Syntrophobotulus glycolicus	Syntrophobotulus	Peptococcaceae	Clostridiales	Clostridia	Firmicutes	Bacteria	NC_015172.1	WP_013625904.1	D	D-1	SGLY_RS14130	>SGLY_RS14075(COG0840)	<SGLY_RS14080(COG1433)	<SGLY_RS14085(COG1348)	<SGLY_RS17665(COG5583)	<SGLY_RS17670	<SGLY_RS14095(COG1464)	<SGLY_RS14100(COG2011)	<SGLY_RS14105(COG1135)	<SGLY_RS14110(COG0535)	<SGLY_RS14115(COG0626)	<SGLY_RS17245(COG0840)	<SGLY_RS14125(COG1410)	<SGLY_RS14130(COG1151)	<SGLY_RS14135(COG0011)	<SGLY_RS14140(COG0326)	<SGLY_RS14145(COG2206)	<SGLY_RS14150(COG0586)	<SGLY_RS14155
GCF_000191045.1_ASM19104v1_genomic.gff	-	868864	Desulfurobacterium thermolithotrophum DSM 11699	Desulfurobacterium thermolithotrophum	Desulfurobacterium	Desulfurobacteriaceae	Desulfurobacteriales	Aquificae	Aquificae	Bacteria	NC_015185.1	WP_013638030.1	E	E-1	DESTER_RS02135	<DESTER_RS02065(COG0552)	<DESTER_RS02070(COG0452)	<DESTER_RS02075(COG0038)	<DESTER_RS02080(COG0501)	<DESTER_RS02085(COG0283)	<DESTER_RS02090(COG1488)	<DESTER_RS02095(COG0177)	<DESTER_RS02100(COG2877)	<DESTER_RS02105(COG0698)	<DESTER_RS02110(COG3118)	<DESTER_RS02115(COG3640)	<DESTER_RS02120(COG1034)	<DESTER_RS02125(COG1894)	<DESTER_RS02130(COG1905)	<DESTER_RS02135(COG1151)	<DESTER_RS02140(COG0437)
GCF_000191045.1_ASM19104v1_genomic.gff	-	868864	Desulfurobacterium thermolithotrophum DSM 11699	Desulfurobacterium thermolithotrophum	Desulfurobacterium	Desulfurobacteriaceae	Desulfurobacteriales	Aquificae	Aquificae	Bacteria	NC_015185.1	WP_013638427.1	D	D-1	DESTER_RS04280	>DESTER_RS04280(COG1151)	>DESTER_RS04285	<DESTER_RS04290(COG0664)
GCF_000191585.1_ASM19158v1_genomic.gff	-	877455	Methanobacterium lacus	Methanobacterium lacus	Methanobacterium	Methanobacteriaceae	Methanobacteriales	Methanobacteria	Euryarchaeota	Archaea	NC_015216.1	WP_013644065.1	A	A-1	METBO_RS02345	>METBO_RS02335(COG4962)	>METBO_RS02340(COG2064)	>METBO_RS02345(COG1152)	>METBO_RS02350(COG1880)	>METBO_RS02355(COG1614)	>METBO_RS02360(COG3640)	>METBO_RS02365(COG2069)	>METBO_RS02370(COG1456)	>METBO_RS02375(COG1142)
GCF_000193435.2_ASM19343v3_genomic.gff	-	632516	Caldicellulosiruptor lactoaceticus 6A	Caldicellulosiruptor lactoaceticus	Caldicellulosiruptor	Thermoanaerobacterales Family III. Incertae Sedis	Thermoanaerobacterales	Clostridia	Firmicutes	Bacteria	NC_015949.1	WP_014043194.1	C	C-2	CALLA_RS10835	<CALLA_RS10820(COG1846)	<CALLA_RS10825(COG1251)	<CALLA_RS10830(COG0437)	<CALLA_RS10835(COG1151)	<CALLA_RS10840(COG1959)	<CALLA_RS10845(COG1924)	<CALLA_RS10850
GCF_000194625.1_ASM19462v1_genomic.gff	-	693661	Archaeoglobus veneficus SNP6	Archaeoglobus veneficus	Archaeoglobus	Archaeoglobaceae	Archaeoglobales	Archaeoglobi	Euryarchaeota	Archaea	NC_015320.1	WP_013683795.1	A	A-2	ARCVE_RS05590	<ARCVE_RS05565(COG1148)	<ARCVE_RS05570(COG1035)	<ARCVE_RS05575(COG1143)	>ARCVE_RS10800(COG1150)	>ARCVE_RS05585(COG2048)	>ARCVE_RS05590(COG1152)	>ARCVE_RS05595(COG1880)	>ARCVE_RS05600(COG1614)	>ARCVE_RS05605(COG3640)	>ARCVE_RS05610(COG2069)	>ARCVE_RS05615(COG1456)	>ARCVE_RS05620	>ARCVE_RS11080
GCF_000195295.1_ASM19529v1_genomic.gff	-	880072	Desulfobacca acetoxidans DSM 11109	Desulfobacca acetoxidans	Desulfobacca	Syntrophaceae	Syntrophobacterales	Deltaproteobacteria	Proteobacteria	Bacteria	NC_015388.1	WP_013705176.1	E	E-1	DESAC_RS00825	<DESAC_RS00815(COG2759)	>DESAC_RS00820(COG1142)	>DESAC_RS00825(COG1151)	>DESAC_RS00830(COG1034)	>DESAC_RS00835(COG3118)	>DESAC_RS00840(COG0492)	>DESAC_RS00845(COG4105)
GCF_000195295.1_ASM19529v1_genomic.gff	-	880072	Desulfobacca acetoxidans DSM 11109	Desulfobacca acetoxidans	Desulfobacca	Syntrophaceae	Syntrophobacterales	Deltaproteobacteria	Proteobacteria	Bacteria	NC_015388.1	WP_013706908.1	E	E-1	DESAC_RS09805	>DESAC_RS09800(COG2069)	>DESAC_RS09805(COG1151)	>DESAC_RS09810(COG1614)	>DESAC_RS09815(COG1456)	>DESAC_RS09820(COG1410)
GCF_000195295.1_ASM19529v1_genomic.gff	-	880072	Desulfobacca acetoxidans DSM 11109	Desulfobacca acetoxidans	Desulfobacca	Syntrophaceae	Syntrophobacterales	Deltaproteobacteria	Proteobacteria	Bacteria	NC_015388.1	WP_013706988.1	E	E-1	DESAC_RS10210	<DESAC_RS10210(COG1151)	<DESAC_RS10215(COG1262)
GCF_000195755.1_ASM19575v1_genomic.gff	-	882	Desulfovibrio vulgaris str. Hildenborough	Desulfovibrio vulgaris	Desulfovibrio	Desulfovibrionaceae	Desulfovibrionales	Deltaproteobacteria	Proteobacteria	Bacteria	NC_002937.3	WP_010939375.1	E	E-2	DVU2098	>DVU2097(COG0664)	>DVU2098(COG1151)	>DVU2099(COG3640)
GCF_000196455.1_ASM19645v1_genomic.gff	-	1511	Acetoanaerobium sticklandii	Acetoanaerobium sticklandii	Acetoanaerobium	Peptostreptococcaceae	Clostridiales	Clostridia	Firmicutes	Bacteria	NC_014614.1	WP_013361373.1	E	E-1	CLOST_RS05990	>CLOST_RS05990(COG1151)	>CLOST_RS05995(COG3640)	>CLOST_RS06000(COG2759)	>CLOST_RS06005(COG3404)	>CLOST_RS06010	>CLOST_RS06015(COG0685)	>CLOST_RS06020(COG1249)	>CLOST_RS06025(COG3640)	>CLOST_RS06030(COG2069)	>CLOST_RS06035(COG1456)	>CLOST_RS06040(COG1410)	>CLOST_RS06045(COG1614)	>CLOST_RS06050(COG0509)	>CLOST_RS06055(COG3894)	>CLOST_RS06060(COG1532)	>CLOST_RS06065
GCF_000196655.1_ASM19665v1_genomic.gff	-	644295	Methanohalobium evestigatum Z-7303	Methanohalobium evestigatum	Methanohalobium	Methanosarcinaceae	Methanosarcinales	Methanomicrobia	Euryarchaeota	Archaea	NC_014253.1	WP_013193912.1	A	A-1	METEV_RS02130	<METEV_RS02090(COG1499)	<METEV_RS02095	<METEV_RS02100(COG2768)	<METEV_RS02105(COG1456)	<METEV_RS02110(COG2069)	<METEV_RS02115(COG3640)	<METEV_RS02120(COG1614)	<METEV_RS02125(COG1880)	<METEV_RS02130(COG1152)
GCF_000204415.1_ASM20441v1_genomic.gff	-	990316	Methanothrix soehngenii GP6	Methanothrix soehngenii	Methanothrix	Methanosaetaceae	Methanosarcinales	Methanomicrobia	Euryarchaeota	Archaea	NC_015416.1	WP_048131971.1	A	A-2	MCON_RS05705	<MCON_RS05680(COG1456)	<MCON_RS05685(COG2069)	<MCON_RS05690(COG3640)	<MCON_RS05695(COG1614)	<MCON_RS05700(COG1880)	<MCON_RS05705(COG1152)
GCF_000204415.1_ASM20441v1_genomic.gff	-	990316	Methanothrix soehngenii GP6	Methanothrix soehngenii	Methanothrix	Methanosaetaceae	Methanosarcinales	Methanomicrobia	Euryarchaeota	Archaea	NC_015416.1	WP_013720260.1	E	E-1	MCON_RS12180	>MCON_RS15345	>MCON_RS12165(COG1598)	>MCON_RS12170(COG1724)	>MCON_RS12175	>MCON_RS12180(COG1151)	>MCON_RS12185(COG1142)
GCF_000204565.1_ASM20456v1_genomic.gff	-	929506	Clostridium botulinum BKT015925	Clostridium botulinum	Clostridium	Clostridiaceae	Clostridiales	Clostridia	Firmicutes	Bacteria	NC_015425.1	WP_013726571.1	C	C-1	CBC4_RS12035	>CBC4_RS12030(COG1959)	>CBC4_RS12035(COG1151)
GCF_000208405.1_ASM20840v1_genomic.gff	-	546271	Selenomonas sputigena ATCC 35185	Selenomonas sputigena	Selenomonas	Selenomonadaceae	Selenomonadales	Negativicutes	Firmicutes	Bacteria	NC_015437.1	WP_013741012.1	B	B-1	SELSP_RS10285	>SELSP_RS10285(COG1151)	>SELSP_RS10290(COG0715)	>SELSP_RS10295(COG0600)	>SELSP_RS10300(COG1116)
GCF_000209385.2_Lach_bact_2_1_46_FAA_V2_genomic.gff	-	742723	Lachnospiraceae bacterium 2_1_46FAA	Lachnospiraceae bacterium 2_1_46FAA	unclassified Lachnospiraceae	Lachnospiraceae	Clostridiales	Clostridia	Firmicutes	Bacteria	NZ_KE150017.1	WP_009462026.1	C	C-1	HMPREF9477_RS02275	>HMPREF9477_RS02270(COG1959)	>HMPREF9477_RS02275(COG1151)	>HMPREF9477_RS02280(COG0437)	>HMPREF9477_RS02285(COG1251)
GCF_000209405.1_Lach_bact_3_1_46FAA_V1_genomic.gff	-	665950	Lachnospiraceae bacterium 3_1_46FAA	Lachnospiraceae bacterium 3_1_46FAA	unclassified Lachnospiraceae	Lachnospiraceae	Clostridiales	Clostridia	Firmicutes	Bacteria	NZ_GL890520.1	WP_004845398.1	C	C-1	HMPREF1025_RS02465	<HMPREF1025_RS02450(COG0574)	<HMPREF1025_RS02455(COG1251)	<HMPREF1025_RS02460(COG0437)	<HMPREF1025_RS02465(COG1151)	<HMPREF1025_RS02470(COG1959)	<HMPREF1025_RS02475(COG1362)
GCF_000209425.1_Lach_bact_6_1_63FAA_V1_genomic.gff	-	658083	Lachnospiraceae bacterium 6_1_63FAA	Lachnospiraceae bacterium 6_1_63FAA	unclassified Lachnospiraceae	Lachnospiraceae	Clostridiales	Clostridia	Firmicutes	Bacteria	NZ_GL890548.1	WP_009246088.1	E	E-1	HMPREF0992_RS00045	<HMPREF0992_RS00005	<HMPREF0992_RS00010	<HMPREF0992_RS00015(COG3894)	<HMPREF0992_RS00020(COG1410)	<HMPREF0992_RS00025(COG1456)	<HMPREF0992_RS00030(COG2069)	<HMPREF0992_RS00035(COG1614)	<HMPREF0992_RS00040(COG3640)	<HMPREF0992_RS00045(COG1151)	<HMPREF0992_RS00050(COG3640)	<HMPREF0992_RS00055(COG0685)	<HMPREF0992_RS00060	<HMPREF0992_RS00065
GCF_000209425.1_Lach_bact_6_1_63FAA_V1_genomic.gff	-	658083	Lachnospiraceae bacterium 6_1_63FAA	Lachnospiraceae bacterium 6_1_63FAA	unclassified Lachnospiraceae	Lachnospiraceae	Clostridiales	Clostridia	Firmicutes	Bacteria	NZ_GL890553.1	WP_004222259.1	C	C-1	HMPREF0992_RS09535	<HMPREF0992_RS09525(COG1251)	<HMPREF0992_RS09530(COG0437)	<HMPREF0992_RS09535(COG1151)	<HMPREF0992_RS09540(COG0714)	<HMPREF0992_RS09545(COG3864)	<HMPREF0992_RS13460	<HMPREF0992_RS09550	<HMPREF0992_RS09555(COG1686)	<HMPREF0992_RS09560(COG1386)	<HMPREF0992_RS09565(COG1354)	<HMPREF0992_RS09570(COG1408)	<HMPREF0992_RS09575(COG1686)	<HMPREF0992_RS09580(COG4905)	<HMPREF0992_RS09585(COG1502)	<HMPREF0992_RS09590(COG0828)	<HMPREF0992_RS09595(COG0013)
GCF_000209465.1_Lach_bact_F0167_V1_genomic.gff	-	575593	Lachnospiraceae oral taxon 107 str. F0167	Lachnospiraceae bacterium oral taxon 500	unclassified Lachnospiraceae	Lachnospiraceae	Clostridiales	Clostridia	Firmicutes	Bacteria	NZ_GL890594.1	WP_009220440.1	B	B-1	HMPREF0491_RS10770	>HMPREF0491_RS10745(COG1024)	>HMPREF0491_RS10750(COG1250)	>HMPREF0491_RS10755(COG1960)	>HMPREF0491_RS10760(COG2086)	>HMPREF0491_RS10765(COG2025)	>HMPREF0491_RS10770(COG1151)
GCF_000210395.1_ASM21039v1_genomic.gff	-	699037	Clostridioides difficile M68	Clostridioides difficile	Clostridioides	Peptostreptococcaceae	Clostridiales	Clostridia	Firmicutes	Bacteria	NC_017175.1	WP_003425376.1	C	C-1	CDM68_RS01060	<CDM68_RS01050(COG1143)	>CDM68_RS01055(COG2843)	>CDM68_RS01060(COG1151)	>CDM68_RS01065(COG0437)	>CDM68_RS01070(COG1251)
GCF_000210395.1_ASM21039v1_genomic.gff	-	699037	Clostridioides difficile M68	Clostridioides difficile	Clostridioides	Peptostreptococcaceae	Clostridiales	Clostridia	Firmicutes	Bacteria	NC_017175.1	WP_003432268.1	E	E-1	CDM68_RS03970	>CDM68_RS03965(COG0280)	>CDM68_RS03970(COG1151)	>CDM68_RS03975(COG3640)	>CDM68_RS03980(COG2759)	>CDM68_RS03985(COG3404)	>CDM68_RS03990(COG0190)	>CDM68_RS03995	>CDM68_RS04000(COG0685)	>CDM68_RS04005(COG1249)	>CDM68_RS04010(COG3640)	>CDM68_RS04015(COG2069)	>CDM68_RS04020(COG1456)	>CDM68_RS04025(COG1410)	>CDM68_RS04030(COG1614)	>CDM68_RS04035(COG0509)	>CDM68_RS04040(COG3894)	>CDM68_RS04045(COG1856)
GCF_000210435.1_ASM21043v1_genomic.gff	-	699035	Clostridioides difficile M120	Clostridioides difficile	Clostridioides	Peptostreptococcaceae	Clostridiales	Clostridia	Firmicutes	Bacteria	NC_017174.1	WP_003420849.1	C	C-1	CDM120_RS01375	>CDM120_RS01370(COG2843)	>CDM120_RS01375(COG1151)	>CDM120_RS01380(COG0437)	>CDM120_RS01385(COG1251)
GCF_000210435.1_ASM21043v1_genomic.gff	-	699035	Clostridioides difficile M120	Clostridioides difficile	Clostridioides	Peptostreptococcaceae	Clostridiales	Clostridia	Firmicutes	Bacteria	NC_017174.1	WP_003418320.1	E	E-1	CDM120_RS04295	>CDM120_RS04290(COG0280)	>CDM120_RS04295(COG1151)	>CDM120_RS04300(COG3640)	>CDM120_RS04305(COG2759)	>CDM120_RS04310(COG3404)	>CDM120_RS04315(COG0190)
GCF_000212395.1_ASM21239v1_genomic.gff	-	747365	Thermodesulfobium narugense DSM 14796	Thermodesulfobium narugense	Thermodesulfobium	Thermodesulfobiaceae	Thermoanaerobacterales	Clostridia	Firmicutes	Bacteria	NC_015499.1	WP_013755418.1	E	E-2	THENA_RS00185	<THENA_RS00170(COG2814)	>THENA_RS00175(COG4642)	>THENA_RS00180(COG3640)	>THENA_RS00185(COG1151)	>THENA_RS00190(COG2258)	>THENA_RS00195(COG1001)
GCF_000212675.2_ASM21267v2_genomic.gff	-	690850	Desulfovibrio africanus str. Walvis Bay	Desulfovibrio africanus	Desulfovibrio	Desulfovibrionaceae	Desulfovibrionales	Deltaproteobacteria	Proteobacteria	Bacteria	NC_016629.1	WP_014260826.1	E	E-2	DESAF_RS14230	<DESAF_RS14210	<DESAF_RS14215(COG4095)	<DESAF_RS14220	<DESAF_RS14225(COG3640)	<DESAF_RS14230(COG1151)	<DESAF_RS14235(COG0664)	<DESAF_RS14240(COG0361)
GCF_000214355.1_ASM21435v1_genomic.gff	-	545695	Treponema azotonutricium ZAS-9	Treponema azotonutricium	Treponema	Spirochaetaceae	Spirochaetales	Spirochaetia	Spirochaetes	Bacteria	NC_015577.1	WP_043923257.1	E	E-1	TREAZ_RS03220	<TREAZ_RS03215(COG1410)	>TREAZ_RS03220(COG1151)	>TREAZ_RS03225(COG3640)	>TREAZ_RS03230(COG1614)	>TREAZ_RS03235(COG2069)	>TREAZ_RS03240(COG1456)	>TREAZ_RS03245(COG1410)	>TREAZ_RS03250	>TREAZ_RS03255
GCF_000214355.1_ASM21435v1_genomic.gff	-	545695	Treponema azotonutricium ZAS-9	Treponema azotonutricium	Treponema	Spirochaetaceae	Spirochaetales	Spirochaetia	Spirochaetes	Bacteria	NC_015577.1	WP_015710481.1	C	C-1	TREAZ_RS03750	<TREAZ_RS03740(COG0655)	>TREAZ_RS03745(COG1959)	>TREAZ_RS03750(COG1151)	>TREAZ_RS03755(COG1142)	>TREAZ_RS03760(COG1251)	>TREAZ_RS03770	>TREAZ_RS03775(COG1714)	>TREAZ_RS03780(COG1300)	>TREAZ_RS03785	>TREAZ_RS03790	>TREAZ_RS03795(COG0714)	>TREAZ_RS03800(COG1721)	>TREAZ_RS03805(COG2249)	>TREAZ_RS03810(COG2145)	>TREAZ_RS03815	>TREAZ_RS03820(COG3630)
GCF_000214375.1_ASM21437v1_genomic.gff	-	545694	Treponema primitia ZAS-2	Treponema primitia	Treponema	Spirochaetaceae	Spirochaetales	Spirochaetia	Spirochaetes	Bacteria	NC_015578.1	WP_041611455.1	E	E-1	TREPR_RS04895	>TREPR_RS04860(COG1457)	>TREPR_RS04870(COG3383)	>TREPR_RS04875	>TREPR_RS04880	>TREPR_RS04885(COG3894)	>TREPR_RS04890	>TREPR_RS04895(COG1151)	>TREPR_RS04900(COG3640)	>TREPR_RS04905(COG1614)	>TREPR_RS04910(COG2069)	>TREPR_RS04915(COG1456)	>TREPR_RS04920(COG1410)
GCF_000214415.1_ASM21441v1_genomic.gff	-	880724	Methanotorris igneus Kol 5	Methanotorris igneus	Methanotorris	Methanocaldococcaceae	Methanococcales	Methanococci	Euryarchaeota	Archaea	NC_015562.1	WP_013798453.1	E	E-1	METIG_RS01405	<METIG_RS09090(COG1035)	<METIG_RS01400	<METIG_RS01405(COG1151)	<METIG_RS01410(COG1142)
GCF_000214415.1_ASM21441v1_genomic.gff	-	880724	Methanotorris igneus Kol 5	Methanotorris igneus	Methanotorris	Methanocaldococcaceae	Methanococcales	Methanococci	Euryarchaeota	Archaea	NC_015562.1	WP_013798522.1	C	C-3	METIG_RS01755	>METIG_RS01745(COG0717)	>METIG_RS01750(COG1036)	>METIG_RS01755(COG1151)	>METIG_RS01760(COG3259)	>METIG_RS01765(COG1941)	>METIG_RS01770(COG1035)
GCF_000214415.1_ASM21441v1_genomic.gff	-	880724	Methanotorris igneus Kol 5	Methanotorris igneus	Methanotorris	Methanocaldococcaceae	Methanococcales	Methanococci	Euryarchaeota	Archaea	NC_015562.1	WP_013799512.1	A	A-1	METIG_RS06995	<METIG_RS06980(COG1614)	<METIG_RS06985(COG1142)	<METIG_RS06990(COG1880)	<METIG_RS06995(COG1152)	<METIG_RS09315(COG1614)
GCF_000214435.1_ASM21443v1_genomic.gff	-	868595	Desulfotomaculum nigrificans CO-1-SRB	Desulfotomaculum nigrificans	Desulfotomaculum	Peptococcaceae	Clostridiales	Clostridia	Firmicutes	Bacteria	NC_015565.1	WP_013809564.1	F	F-1	DESCA_RS01885	>DESCA_RS01840(COG0664)	>DESCA_RS01845(COG0651)	>DESCA_RS01850(COG0650)	>DESCA_RS01855(COG3260)	>DESCA_RS01860(COG1143)	>DESCA_RS01865(COG0852)	>DESCA_RS01870(COG3261)	>DESCA_RS01875(COG0375)	>DESCA_RS01880(COG1142)	>DESCA_RS01885(COG1151)	>DESCA_RS01890(COG3640)	>DESCA_RS01895(COG0378)	>DESCA_RS01900(COG0068)	>DESCA_RS01905(COG0298)	>DESCA_RS01910(COG0409)	>DESCA_RS01915(COG0309)	<DESCA_RS01920(COG0642)	<DESCA_RS01925(COG0745)
GCF_000214435.1_ASM21443v1_genomic.gff	-	868595	Desulfotomaculum nigrificans CO-1-SRB	Desulfotomaculum nigrificans	Desulfotomaculum	Peptococcaceae	Clostridiales	Clostridia	Firmicutes	Bacteria	NC_015565.1	WP_003544498.1	F	F-1	DESCA_RS06035	<DESCA_RS06030(COG3640)	<DESCA_RS06035(COG1151)	<DESCA_RS06040(COG0664)
GCF_000214435.1_ASM21443v1_genomic.gff	-	868595	Desulfotomaculum nigrificans CO-1-SRB	Desulfotomaculum nigrificans	Desulfotomaculum	Peptococcaceae	Clostridiales	Clostridia	Firmicutes	Bacteria	NC_015565.1	WP_013810488.1	D	D-1	DESCA_RS10285	>DESCA_RS10285(COG1151)
GCF_000214725.1_ASM21472v1_genomic.gff	-	868131	Methanobacterium paludis	Methanobacterium paludis	Methanobacterium	Methanobacteriaceae	Methanobacteriales	Methanobacteria	Euryarchaeota	Archaea	NC_015574.1	WP_013826442.1	A	A-1	MSWAN_RS09560	<MSWAN_RS09530(COG1142)	<MSWAN_RS09535(COG1456)	<MSWAN_RS09540(COG2069)	<MSWAN_RS09545(COG3640)	<MSWAN_RS09550(COG1614)	<MSWAN_RS09555(COG1880)	<MSWAN_RS09560(COG1152)
GCF_000215025.1_ASM21502v2_genomic.gff	-	768727	Veillonella parvula ACS-068-V-Sch12	Veillonella parvula	Veillonella	Veillonellaceae	Veillonellales	Negativicutes	Firmicutes	Bacteria	NZ_AEXI01000011.1	WP_004697887.1	B	B-1	HMPREF9323_RS04655	<HMPREF9323_RS04655(COG1151)
GCF_000215085.1_ASM21508v1_genomic.gff	-	696281	Desulfotomaculum ruminis DSM 2154	Desulfotomaculum ruminis	Desulfotomaculum	Peptococcaceae	Clostridiales	Clostridia	Firmicutes	Bacteria	NC_015589.1	WP_013840907.1	F	F-1	DESRU_RS04385	<DESRU_RS04360(COG1116)	<DESRU_RS04365(COG0600)	<DESRU_RS04370(COG0715)	>DESRU_RS04375(COG1283)	>DESRU_RS04380(COG0664)	>DESRU_RS04385(COG1151)	>DESRU_RS04390(COG3640)	>DESRU_RS04395(COG0778)	>DESRU_RS04400(COG1451)
GCF_000215085.1_ASM21508v1_genomic.gff	-	696281	Desulfotomaculum ruminis DSM 2154	Desulfotomaculum ruminis	Desulfotomaculum	Peptococcaceae	Clostridiales	Clostridia	Firmicutes	Bacteria	NC_015589.1	WP_013843271.1	D	D-2	DESRU_RS16740	>DESRU_RS16730(COG2227)	>DESRU_RS16735(COG0664)	>DESRU_RS16740(COG1151)	>DESRU_RS16745(COG1853)
GCF_000215975.1_ASM21597v1_genomic.gff	-	795359	Thermodesulfobacterium geofontis OPF15	Thermodesulfobacterium geofontis	Thermodesulfobacterium	Thermodesulfobacteriaceae	Thermodesulfobacteriales	Thermodesulfobacteria	Thermodesulfobacteria	Bacteria	NC_015682.1	WP_013909202.1	E	others	TOPB45_RS02070	<TOPB45_RS02040(COG0492)	<TOPB45_RS08745(COG1456)	<TOPB45_RS02050(COG1614)	<TOPB45_RS02055(COG2069)	<TOPB45_RS02060(COG0685)	<TOPB45_RS02065	<TOPB45_RS02070(COG1151)	<TOPB45_RS02075(COG0190)	<TOPB45_RS02080(COG2759)	<TOPB45_RS02085(COG1087)
GCF_000217795.1_ASM21779v1_genomic.gff	-	667014	Thermodesulfatator indicus DSM 15286	Thermodesulfatator indicus	Thermodesulfatator	Thermodesulfobacteriaceae	Thermodesulfobacteriales	Thermodesulfobacteria	Thermodesulfobacteria	Bacteria	NC_015681.1	WP_013908030.1	E	E-1	THEIN_RS07230	>THEIN_RS07230(COG1151)	>THEIN_RS07235(COG3279)
GCF_000217795.1_ASM21779v1_genomic.gff	-	667014	Thermodesulfatator indicus DSM 15286	Thermodesulfatator indicus	Thermodesulfatator	Thermodesulfobacteriaceae	Thermodesulfobacteriales	Thermodesulfobacteria	Thermodesulfobacteria	Bacteria	NC_015681.1	WP_013908774.1	E	E-3	THEIN_RS11175	<THEIN_RS11095	<THEIN_RS11100(COG3383)	<THEIN_RS11105(COG0493)	<THEIN_RS11855(COG0226)	<THEIN_RS11115(COG1410)	<THEIN_RS11120	<THEIN_RS11125	<THEIN_RS11130(COG1456)	<THEIN_RS11135(COG1614)	<THEIN_RS11140(COG2069)	<THEIN_RS11145	<THEIN_RS11150(COG1908)	<THEIN_RS11155(COG1150)	<THEIN_RS11160(COG1908)	<THEIN_RS11165(COG1148)	<THEIN_RS11175(COG1151)	<THEIN_RS11180(COG0190)	<THEIN_RS11185(COG2759)
GCF_000217995.1_ASM21799v1_genomic.gff	-	679901	Methanosalsum zhilinae DSM 4017	Methanosalsum zhilinae	Methanosalsum	Methanosarcinaceae	Methanosarcinales	Methanomicrobia	Euryarchaeota	Archaea	NC_015676.1	WP_013898430.1	A	A-1	MZHIL_RS05775	<MZHIL_RS05750(COG1456)	<MZHIL_RS05755(COG2069)	<MZHIL_RS05760(COG3640)	<MZHIL_RS05765(COG1614)	<MZHIL_RS05770(COG1880)	<MZHIL_RS05775(COG1152)
GCF_000218445.1_Lach_bact_1_1_57FAA_V1_genomic.gff	-	658081	Lachnospiraceae bacterium 1_1_57FAA	Lachnospiraceae bacterium 1_1_57FAA	unclassified Lachnospiraceae	Lachnospiraceae	Clostridiales	Clostridia	Firmicutes	Bacteria	NZ_GL945300.1	WP_004845398.1	C	C-1	HMPREF0990_RS08205	<HMPREF0990_RS08190(COG0574)	<HMPREF0990_RS08195(COG1251)	<HMPREF0990_RS08200(COG0437)	<HMPREF0990_RS08205(COG1151)	<HMPREF0990_RS08210(COG1959)	<HMPREF0990_RS08215(COG1362)
GCF_000218465.1_Lach_bact_2_1_58FAA_V1_genomic.gff	-	658082	Lachnospiraceae bacterium 2_1_58FAA	Lachnospiraceae bacterium 2_1_58FAA	unclassified Lachnospiraceae	Lachnospiraceae	Clostridiales	Clostridia	Firmicutes	Bacteria	NZ_GL945344.1	WP_009245693.1	C	C-1	HMPREF0991_RS14345	<HMPREF0991_RS14335(COG1609)	>HMPREF0991_RS14340(COG1959)	>HMPREF0991_RS14345(COG1151)	>HMPREF0991_RS14350(COG0437)	>HMPREF0991_RS14355(COG1251)
GCF_000219125.1_ASM21912v1_genomic.gff	-	1009370	Acetonema longum DSM 6540	Acetonema longum	Acetonema	Sporomusaceae	Selenomonadales	Negativicutes	Firmicutes	Bacteria	NZ_AFGF01000050.1	WP_004093936.1	F	F-1	ALO_RS06050	<ALO_RS05970(COG1199)	<ALO_RS05975	<ALO_RS05980(COG0212)	<ALO_RS05985(COG3383)	<ALO_RS05995(COG1142)	<ALO_RS06000(COG1142)	<ALO_RS06005(COG4624)	<ALO_RS06010(COG1142)	<ALO_RS06015(COG1532)	<ALO_RS06020(COG1410)	<ALO_RS06025(COG2069)	<ALO_RS06030(COG3640)	<ALO_RS06035(COG3894)	<ALO_RS06040(COG1456)	<ALO_RS06045(COG1614)	<ALO_RS06050(COG1151)	<ALO_RS06055(COG3640)	<ALO_RS06060	<ALO_RS06065(COG2759)	<ALO_RS06070(COG0190)	<ALO_RS06075(COG3894)	<ALO_RS06080(COG0280)
GCF_000219125.1_ASM21912v1_genomic.gff	-	1009370	Acetonema longum DSM 6540	Acetonema longum	Acetonema	Sporomusaceae	Selenomonadales	Negativicutes	Firmicutes	Bacteria	NZ_AFGF01000191.1	WP_004098036.1	D	D-2	ALO_RS16230	<ALO_RS16215	<ALO_RS16220(COG1472)	<ALO_RS16225(COG0617)	<ALO_RS16230(COG1151)	<ALO_RS16235	<ALO_RS16240(COG0589)
GCF_000220645.1_ASM22064v1_genomic.gff	-	1053692	Methanococcus maripaludis X1	Methanococcus maripaludis	Methanococcus	Methanococcaceae	Methanococcales	Methanococci	Euryarchaeota	Archaea	NC_015847.1	WP_013999442.1	A	A-1	GYY_RS05615	>GYY_RS05570(COG1810)	>GYY_RS05575(COG3640)	<GYY_RS05580(COG1532)	<GYY_RS05585(COG1142)	<GYY_RS05590(COG1456)	<GYY_RS05595(COG2069)	<GYY_RS05600(COG3640)	<GYY_RS05605(COG1614)	<GYY_RS05610(COG1880)	<GYY_RS05615(COG1152)	<GYY_RS05620(COG1810)	<GYY_RS05625(COG0030)	<GYY_RS05630(COG2264)	<GYY_RS05635(COG1389)
GCF_000221605.1_ASM22160v1_genomic.gff	-	944564	Veillonella sp. oral taxon 780 str. F0422	Veillonella sp. oral taxon 780	Veillonella	Veillonellaceae	Veillonellales	Negativicutes	Firmicutes	Bacteria	NZ_AFUJ01000023.1	WP_009353300.1	B	B-1	HMPREF9200_RS03210	>HMPREF9200_RS03210(COG1151)	>HMPREF9200_RS03215(COG2226)
GCF_000222855.1_WG1_1.0_genomic.gff	-	758828	Succinivibrionaceae bacterium WG-1	Succinivibrionaceae bacterium WG-1	unclassified Succinivibrionaceae	Succinivibrionaceae	Aeromonadales	Gammaproteobacteria	Proteobacteria	Bacteria	NZ_GL995205.1	WP_010454604.1	B	B-1	WG1_RS0103745	<WG1_RS0103740(COG0840)	>WG1_RS0103745(COG1151)	>WG1_RS0103750(COG0715)	>WG1_RS13975
GCF_000224515.1_ASM22451v1_genomic.gff	-	913865	Desulfosporosinus sp. OT	Desulfosporosinus sp. OT	Desulfosporosinus	Peptococcaceae	Clostridiales	Clostridia	Firmicutes	Bacteria	NZ_AGAF01000010.1	WP_009612878.1	F	F-1	DOT_RS00805	>DOT_RS00800(COG3640)	>DOT_RS00805(COG1151)	>DOT_RS00810(COG1614)	>DOT_RS00815(COG1456)	>DOT_RS00820(COG3894)	>DOT_RS00825(COG3640)	>DOT_RS00830(COG2069)	>DOT_RS00835(COG1410)	>DOT_RS00840	>DOT_RS00845(COG4585)	>DOT_RS00850(COG2197)	>DOT_RS00855(COG1236)
GCF_000224515.1_ASM22451v1_genomic.gff	-	913865	Desulfosporosinus sp. OT	Desulfosporosinus sp. OT	Desulfosporosinus	Peptococcaceae	Clostridiales	Clostridia	Firmicutes	Bacteria	NZ_AGAF01000053.1	WP_009614964.1	D	D-1	DOT_RS04800	<DOT_RS04800(COG1151)
GCF_000224515.1_ASM22451v1_genomic.gff	-	913865	Desulfosporosinus sp. OT	Desulfosporosinus sp. OT	Desulfosporosinus	Peptococcaceae	Clostridiales	Clostridia	Firmicutes	Bacteria	NZ_AGAF01000111.1	WP_009617852.1	F	F-1	DOT_RS10045	>DOT_RS10035(COG1846)	<DOT_RS10040(COG3640)	<DOT_RS10045(COG1151)	<DOT_RS10050(COG0664)	<DOT_RS10055
GCF_000226255.1_ASM22625v1_genomic.gff	-	298701	Desulfovibrio sp. A2	Desulfovibrio sp. A2	Desulfovibrio	Desulfovibrionaceae	Desulfovibrionales	Deltaproteobacteria	Proteobacteria	Bacteria	NZ_AGFG01000051.1	WP_007525743.1	E	E-2	DA2_RS11285	<DA2_RS11280(COG3640)	<DA2_RS11285(COG1151)	<DA2_RS11290(COG0664)
GCF_000230835.1_ASM23083v1_genomic.gff	-	641107	Clostridium sp. DL-VIII	Clostridium sp. DL-VIII	Clostridium	Clostridiaceae	Clostridiales	Clostridia	Firmicutes	Bacteria	NZ_CM001240.1	WP_009167573.1	C	C-1	CDLVIII_RS00760	<CDLVIII_RS00750(COG1846)	>CDLVIII_RS00755(COG1959)	>CDLVIII_RS00760(COG1151)	<CDLVIII_RS00765(COG1309)	>CDLVIII_RS00770(COG0655)	>CDLVIII_RS00775(COG2814)
GCF_000230835.1_ASM23083v1_genomic.gff	-	641107	Clostridium sp. DL-VIII	Clostridium sp. DL-VIII	Clostridium	Clostridiaceae	Clostridiales	Clostridia	Firmicutes	Bacteria	NZ_CM001240.1	WP_009168102.1	D	D-1	CDLVIII_RS03775	>CDLVIII_RS03770(COG2244)	<CDLVIII_RS03775(COG1151)
GCF_000231385.2_ASM23138v3_genomic.gff	-	768704	Desulfosporosinus meridiei DSM 13257	Desulfosporosinus meridiei	Desulfosporosinus	Peptococcaceae	Clostridiales	Clostridia	Firmicutes	Bacteria	NC_018515.1	WP_014901427.1	D	D-1	DESMER_RS02180	>DESMER_RS02180(COG1151)
GCF_000231385.2_ASM23138v3_genomic.gff	-	768704	Desulfosporosinus meridiei DSM 13257	Desulfosporosinus meridiei	Desulfosporosinus	Peptococcaceae	Clostridiales	Clostridia	Firmicutes	Bacteria	NC_018515.1	WP_014902672.1	F	F-1	DESMER_RS08685	<DESMER_RS08680(COG1251)	<DESMER_RS08685(COG1151)	<DESMER_RS08690(COG1142)
GCF_000231385.2_ASM23138v3_genomic.gff	-	768704	Desulfosporosinus meridiei DSM 13257	Desulfosporosinus meridiei	Desulfosporosinus	Peptococcaceae	Clostridiales	Clostridia	Firmicutes	Bacteria	NC_018515.1	WP_014903366.1	F	F-1	DESMER_RS12230	<DESMER_RS12200(COG1410)	<DESMER_RS12205(COG2069)	<DESMER_RS12210(COG3640)	<DESMER_RS12215(COG3894)	<DESMER_RS12220(COG1456)	<DESMER_RS12225(COG1614)	<DESMER_RS12230(COG1151)	<DESMER_RS12235(COG3640)
GCF_000231385.2_ASM23138v3_genomic.gff	-	768704	Desulfosporosinus meridiei DSM 13257	Desulfosporosinus meridiei	Desulfosporosinus	Peptococcaceae	Clostridiales	Clostridia	Firmicutes	Bacteria	NC_018515.1	WP_014903998.1	F	F-1	DESMER_RS15440	<DESMER_RS15435(COG3640)	<DESMER_RS15440(COG1151)	<DESMER_RS15445(COG0664)	<DESMER_RS15450(COG2388)
GCF_000231385.2_ASM23138v3_genomic.gff	-	768704	Desulfosporosinus meridiei DSM 13257	Desulfosporosinus meridiei	Desulfosporosinus	Peptococcaceae	Clostridiales	Clostridia	Firmicutes	Bacteria	NC_018515.1	WP_014904234.1	B	B-1	DESMER_RS16680	>DESMER_RS16680(COG1151)	>DESMER_RS16685
GCF_000231405.2_ASM23140v3_genomic.gff	-	871968	Desulfitobacterium metallireducens DSM 15288	Desulfitobacterium metallireducens	Desulfitobacterium	Peptococcaceae	Clostridiales	Clostridia	Firmicutes	Bacteria	NZ_CP007032.1	WP_006715279.1	D	D-1	DESME_RS03350	>DESME_RS03350(COG1151)
GCF_000231405.2_ASM23140v3_genomic.gff	-	871968	Desulfitobacterium metallireducens DSM 15288	Desulfitobacterium metallireducens	Desulfitobacterium	Peptococcaceae	Clostridiales	Clostridia	Firmicutes	Bacteria	NZ_CP007032.1	WP_006715418.1	F	F-1	DESME_RS07005	>DESME_RS07000(COG3640)	>DESME_RS07005(COG1151)	>DESME_RS07010(COG1614)	>DESME_RS07015(COG1456)	>DESME_RS07020(COG3894)	>DESME_RS07025(COG3640)	>DESME_RS07030(COG2069)	>DESME_RS07035(COG1410)	>DESME_RS07040	>DESME_RS07045(COG4585)	>DESME_RS07050(COG2197)	>DESME_RS07055(COG1236)
GCF_000233715.2_ASM23371v3_genomic.gff	-	767817	Desulfotomaculum gibsoniae DSM 7213	Desulfotomaculum gibsoniae	Desulfotomaculum	Peptococcaceae	Clostridiales	Clostridia	Firmicutes	Bacteria	NC_021184.1	WP_006523451.1	F	F-1	DESGI_RS02510	>DESGI_RS23560(COG0599)	>DESGI_RS02510(COG1151)	>DESGI_RS02515(COG1614)
GCF_000233715.2_ASM23371v3_genomic.gff	-	767817	Desulfotomaculum gibsoniae DSM 7213	Desulfotomaculum gibsoniae	Desulfotomaculum	Peptococcaceae	Clostridiales	Clostridia	Firmicutes	Bacteria	NC_021184.1	WP_006523723.1	F	F-1	DESGI_RS05590	>DESGI_RS05590(COG1151)	>DESGI_RS05595(COG1614)
GCF_000233715.2_ASM23371v3_genomic.gff	-	767817	Desulfotomaculum gibsoniae DSM 7213	Desulfotomaculum gibsoniae	Desulfotomaculum	Peptococcaceae	Clostridiales	Clostridia	Firmicutes	Bacteria	NC_021184.1	WP_006521919.1	F	F-1	DESGI_RS09765	<DESGI_RS09735(COG1148)	<DESGI_RS09740(COG1410)	<DESGI_RS09745(COG2069)	<DESGI_RS09750(COG3640)	<DESGI_RS09755(COG1456)	<DESGI_RS09760(COG1614)	<DESGI_RS09765(COG1151)	<DESGI_RS09770(COG3640)	<DESGI_RS09775	<DESGI_RS09790(COG1149)
GCF_000233715.2_ASM23371v3_genomic.gff	-	767817	Desulfotomaculum gibsoniae DSM 7213	Desulfotomaculum gibsoniae	Desulfotomaculum	Peptococcaceae	Clostridiales	Clostridia	Firmicutes	Bacteria	NC_021184.1	WP_006521888.1	D	D-1	DESGI_RS13165	>DESGI_RS13165(COG1151)	<DESGI_RS13170(COG0402)
GCF_000233715.2_ASM23371v3_genomic.gff	-	767817	Desulfotomaculum gibsoniae DSM 7213	Desulfotomaculum gibsoniae	Desulfotomaculum	Peptococcaceae	Clostridiales	Clostridia	Firmicutes	Bacteria	NC_021184.1	WP_006520673.1	C	C-2	DESGI_RS14680	<DESGI_RS14665(COG4636)	<DESGI_RS14670(COG1251)	<DESGI_RS14675(COG0437)	<DESGI_RS14680(COG1151)	<DESGI_RS14685(COG1959)
GCF_000234155.1_Clos_clos_2_1_49FAA_V1_genomic.gff	-	742735	[Clostridium] clostridioforme 2_1_49FAA	[Clostridium] clostridioforme	Lachnoclostridium	Lachnospiraceae	Clostridiales	Clostridia	Firmicutes	Bacteria	NZ_JH376874.1	WP_003525544.1	C	C-2	HMPREF9467_RS18100	<HMPREF9467_RS18085(COG0282)	<HMPREF9467_RS18090(COG0280)	<HMPREF9467_RS18095(COG4624)	<HMPREF9467_RS18100(COG1151)	<HMPREF9467_RS18105(COG3870)	<HMPREF9467_RS18110(COG0265)
GCF_000235505.1_Clos_hath_WAL_18680_V1_genomic.gff	-	742737	Hungatella hathewayi WAL-18680	Hungatella hathewayi	Hungatella	Clostridiaceae	Clostridiales	Clostridia	Firmicutes	Bacteria	NZ_JH379027.1	WP_006780515.1	C	C-2	HMPREF9473_RS12670	>HMPREF9473_RS12610	>HMPREF9473_RS26205(COG3275)	>HMPREF9473_RS12620(COG3947)	>HMPREF9473_RS12625(COG1989)	>HMPREF9473_RS27130	>HMPREF9473_RS12630(COG3847)	>HMPREF9473_RS12635(COG3745)	>HMPREF9473_RS12640(COG4963)	>HMPREF9473_RS12645(COG4962)	>HMPREF9473_RS12650(COG4965)	>HMPREF9473_RS26210(COG2064)	>HMPREF9473_RS12660(COG1430)	>HMPREF9473_RS12665(COG1196)	>HMPREF9473_RS12670(COG1151)	>HMPREF9473_RS12675(COG0437)	>HMPREF9473_RS12680(COG1251)	>HMPREF9473_RS12685(COG4961)	>HMPREF9473_RS12690(COG4961)	>HMPREF9473_RS12695	>HMPREF9473_RS12700	>HMPREF9473_RS12705(COG0745)	>HMPREF9473_RS12710(COG0642)	>HMPREF9473_RS26865	>HMPREF9473_RS12725(COG5263)	>HMPREF9473_RS12730	>HMPREF9473_RS26220(COG5263)	>HMPREF9473_RS12740(COG5263)	>HMPREF9473_RS12745(COG5263)	>HMPREF9473_RS12750(COG2015)
GCF_000235565.1_ASM23556v1_genomic.gff	-	1110509	Methanosaeta harundinacea 6Ac	Methanosaeta harundinacea	Methanothrix	Methanosaetaceae	Methanosarcinales	Methanomicrobia	Euryarchaeota	Archaea	NC_017527.1	WP_014586347.1	A	A-2	MHAR_RS04070	>MHAR_RS04070(COG1152)	>MHAR_RS04075(COG1880)	>MHAR_RS04080(COG1614)	>MHAR_RS04085(COG1614)
GCF_000235565.1_ASM23556v1_genomic.gff	-	1110509	Methanosaeta harundinacea 6Ac	Methanosaeta harundinacea	Methanothrix	Methanosaetaceae	Methanosarcinales	Methanomicrobia	Euryarchaeota	Archaea	NC_017527.1	WP_014587172.1	E	E-1	MHAR_RS08325	<MHAR_RS08305	<MHAR_RS08310(COG1142)	<MHAR_RS08315(COG3383)	<MHAR_RS08320(COG0437)	<MHAR_RS08325(COG1151)
GCF_000235565.1_ASM23556v1_genomic.gff	-	1110509	Methanosaeta harundinacea 6Ac	Methanosaeta harundinacea	Methanothrix	Methanosaetaceae	Methanosarcinales	Methanomicrobia	Euryarchaeota	Archaea	NC_017527.1	WP_014587855.1	A	A-2	MHAR_RS11850	<MHAR_RS11815(COG1456)	<MHAR_RS11820(COG2069)	<MHAR_RS11825(COG3640)	<MHAR_RS11830	<MHAR_RS11835(COG1614)	<MHAR_RS11840(COG1614)	<MHAR_RS11845(COG1880)	<MHAR_RS11850(COG1152)
GCF_000235605.1_ASM23560v1_genomic.gff	-	768706	Desulfosporosinus orientis DSM 765	Desulfosporosinus orientis	Desulfosporosinus	Peptococcaceae	Clostridiales	Clostridia	Firmicutes	Bacteria	NC_016584.1	WP_014182951.1	D	D-1	DESOR_RS02050	>DESOR_RS02050(COG1151)
GCF_000235605.1_ASM23560v1_genomic.gff	-	768706	Desulfosporosinus orientis DSM 765	Desulfosporosinus orientis	Desulfosporosinus	Peptococcaceae	Clostridiales	Clostridia	Firmicutes	Bacteria	NC_016584.1	WP_014185585.1	F	F-1	DESOR_RS15820	<DESOR_RS15790(COG1410)	<DESOR_RS15795(COG2069)	<DESOR_RS15800(COG3640)	<DESOR_RS15805(COG3894)	<DESOR_RS15810(COG1456)	<DESOR_RS15815(COG1614)	<DESOR_RS15820(COG1151)	<DESOR_RS15825(COG3640)
GCF_000235605.1_ASM23560v1_genomic.gff	-	768706	Desulfosporosinus orientis DSM 765	Desulfosporosinus orientis	Desulfosporosinus	Peptococcaceae	Clostridiales	Clostridia	Firmicutes	Bacteria	NC_016584.1	WP_014186424.1	F	F-1	DESOR_RS20095	<DESOR_RS20090(COG3640)	<DESOR_RS20095(COG1151)	<DESOR_RS20100(COG0664)	>DESOR_RS20105(COG1846)	>DESOR_RS20110(COG2814)
GCF_000235605.1_ASM23560v1_genomic.gff	-	768706	Desulfosporosinus orientis DSM 765	Desulfosporosinus orientis	Desulfosporosinus	Peptococcaceae	Clostridiales	Clostridia	Firmicutes	Bacteria	NC_016584.1	WP_014186667.1	B	B-1	DESOR_RS21330	>DESOR_RS21330(COG1151)	>DESOR_RS21335
GCF_000235685.2_ASM23568v3_genomic.gff	-	882090	Methanolinea tarda NOBI-1	Methanolinea tarda	Methanolinea	Methanoregulaceae	Methanomicrobiales	Methanomicrobia	Euryarchaeota	Archaea	NZ_AGIY02000001.1	WP_007313967.1	E	E-2	METTADRAFT_RS03100	>METTADRAFT_RS03075(COG1131)	>METTADRAFT_RS03080	>METTADRAFT_RS03085(COG2414)	>METTADRAFT_RS03090(COG0476)	>METTADRAFT_RS03095(COG1977)	>METTADRAFT_RS03100(COG1151)	>METTADRAFT_RS03105(COG3640)	>METTADRAFT_RS03110(COG1141)	>METTADRAFT_RS03115(COG0785)	>METTADRAFT_RS10485(COG3322)
GCF_000237085.1_ASM23708v1_genomic.gff	-	720554	[Clostridium] clariflavum DSM 19732	[Clostridium] clariflavum	Ruminiclostridium	Ruminococcaceae	Clostridiales	Clostridia	Firmicutes	Bacteria	NC_016627.1	WP_014253869.1	D	D-1	CLOCL_RS02520	>CLOCL_RS02510(COG4359)	>CLOCL_RS02515(COG0371)	>CLOCL_RS02520(COG1151)
GCF_000237085.1_ASM23708v1_genomic.gff	-	720554	[Clostridium] clariflavum DSM 19732	[Clostridium] clariflavum	Ruminiclostridium	Ruminococcaceae	Clostridiales	Clostridia	Firmicutes	Bacteria	NC_016627.1	WP_027622591.1	B	B-1	CLOCL_RS03890	>CLOCL_RS03890(COG1151)	>CLOCL_RS03895(COG0715)	>CLOCL_RS03900(COG0600)	>CLOCL_RS03905(COG1116)	>CLOCL_RS03910
GCF_000238035.1_ASM23803v1_genomic.gff	-	537010	Desulfitobacterium hafniense DP7	Desulfitobacterium hafniense	Desulfitobacterium	Peptococcaceae	Clostridiales	Clostridia	Firmicutes	Bacteria	NZ_JH414441.1	WP_005808331.1	F	F-1	HMPREF0322_RS01440	<HMPREF0322_RS01415	<HMPREF0322_RS01420	<HMPREF0322_RS01425(COG1208)	<HMPREF0322_RS01430(COG0451)	<HMPREF0322_RS01435(COG1251)	<HMPREF0322_RS01440(COG1151)	<HMPREF0322_RS01445(COG1142)	<HMPREF0322_RS01450(COG0664)	<HMPREF0322_RS01455(COG1116)	<HMPREF0322_RS01460(COG0715)	<HMPREF0322_RS01465(COG0600)	<HMPREF0322_RS01470(COG0011)	<HMPREF0322_RS01475(COG1512)	<HMPREF0322_RS01480(COG1704)	<HMPREF0322_RS01485(COG1968)	<HMPREF0322_RS01490(COG3585)	<HMPREF0322_RS01495
GCF_000238035.1_ASM23803v1_genomic.gff	-	537010	Desulfitobacterium hafniense DP7	Desulfitobacterium hafniense	Desulfitobacterium	Peptococcaceae	Clostridiales	Clostridia	Firmicutes	Bacteria	NZ_JH414464.1	WP_011459810.1	F	F-1	HMPREF0322_RS09680	<HMPREF0322_RS09650(COG1410)	<HMPREF0322_RS09655(COG2069)	<HMPREF0322_RS09660(COG3640)	<HMPREF0322_RS09665(COG3894)	<HMPREF0322_RS09670(COG1456)	<HMPREF0322_RS09675(COG1614)	<HMPREF0322_RS09680(COG1151)	<HMPREF0322_RS09685(COG3640)
GCF_000238035.1_ASM23803v1_genomic.gff	-	537010	Desulfitobacterium hafniense DP7	Desulfitobacterium hafniense	Desulfitobacterium	Peptococcaceae	Clostridiales	Clostridia	Firmicutes	Bacteria	NZ_JH414475.1	WP_005813136.1	F	F-1	HMPREF0322_RS13190	<HMPREF0322_RS13185(COG3640)	<HMPREF0322_RS13190(COG1151)	<HMPREF0322_RS13195(COG1142)	<HMPREF0322_RS13200(COG0664)	<HMPREF0322_RS13205
GCF_000238035.1_ASM23803v1_genomic.gff	-	537010	Desulfitobacterium hafniense DP7	Desulfitobacterium hafniense	Desulfitobacterium	Peptococcaceae	Clostridiales	Clostridia	Firmicutes	Bacteria	NZ_JH414480.1	WP_005813738.1	D	D-1	HMPREF0322_RS14700	>HMPREF0322_RS14700(COG1151)	>HMPREF0322_RS14705(COG0664)	>HMPREF0322_RS14710(COG2846)	>HMPREF0322_RS14715	>HMPREF0322_RS14720
GCF_000238615.1_Synerg_sp_3_1_syn1_V1_genomic.gff	-	457415	Synergistes sp. 3_1_syn1	Synergistes sp. 3_1_syn1	Synergistes	Synergistaceae	Synergistales	Synergistia	Synergistetes	Bacteria	NZ_JH414693.1	WP_008709802.1	C	C-1	HMPREF1006_RS04675	<HMPREF1006_RS04665(COG1251)	<HMPREF1006_RS04670(COG0437)	<HMPREF1006_RS04675(COG1151)	<HMPREF1006_RS04680(COG1959)
GCF_000240115.1_ASM24011v1_genomic.gff	-	1075091	Clostridium sporogenes PA 3679	Clostridium sporogenes	Clostridium	Clostridiaceae	Clostridiales	Clostridia	Firmicutes	Bacteria	NZ_JH470558.1	WP_080584870.1	D	D-1	IYC_RS01350	<IYC_RS01355(COG1063)	<IYC_RS01350(COG1151)
GCF_000240115.1_ASM24011v1_genomic.gff	-	1075091	Clostridium sporogenes PA 3679	Clostridium sporogenes	Clostridium	Clostridiaceae	Clostridiales	Clostridia	Firmicutes	Bacteria	NZ_JH470554.1	WP_003495511.1	C	C-1	IYC_RS03685	>IYC_RS03690(COG1959)	>IYC_RS03685(COG1151)	>IYC_RS03680(COG0437)	>IYC_RS03675(COG1251)
GCF_000242235.1_Lach_bact_ACC2_V1_genomic.gff	-	796942	Stomatobaculum longum	Stomatobaculum longum	Stomatobaculum	Lachnospiraceae	Clostridiales	Clostridia	Firmicutes	Bacteria	NZ_JH590863.1	WP_009533468.1	B	B-1	HMPREF9623_RS08355	<HMPREF9623_RS08280(COG1309)	>HMPREF9623_RS08285	>HMPREF9623_RS08290(COG0766)	>HMPREF9623_RS08295(COG0192)	>HMPREF9623_RS08300(COG0642)	>HMPREF9623_RS08305(COG0745)	>HMPREF9623_RS08310(COG0745)	>HMPREF9623_RS08315(COG0642)	>HMPREF9623_RS08320	>HMPREF9623_RS08325(COG1131)	>HMPREF9623_RS08330	>HMPREF9623_RS08335(COG4260)	>HMPREF9623_RS08340	>HMPREF9623_RS08345(COG1512)	>HMPREF9623_RS08350(COG0498)	>HMPREF9623_RS08355(COG1151)
GCF_000242315.1_ASM24231v1_genomic.gff	-	861454	Lachnospiraceae bacterium oral taxon 082 str. F0431	Lachnospiraceae bacterium oral taxon 082	unclassified Lachnospiraceae	Lachnospiraceae	Clostridiales	Clostridia	Firmicutes	Bacteria	NZ_JH591118.1	WP_009445125.1	B	B-1	HMPREF9099_RS03085	<HMPREF9099_RS03085(COG1151)	<HMPREF9099_RS03090(COG2025)	<HMPREF9099_RS03095(COG2086)	<HMPREF9099_RS03100(COG1960)	<HMPREF9099_RS03105(COG1250)	<HMPREF9099_RS03110
GCF_000242615.2_ASM24261v3_genomic.gff	-	903818	Holophaga foetida DSM 6591	Holophaga foetida	Holophaga	Holophagaceae	Holophagales	Holophagae	Acidobacteria	Bacteria	NZ_KI912268.1	WP_005036686.1	F	F-1	HOLFODRAFT_RS0205865	>HOLFODRAFT_RS0205855	>HOLFODRAFT_RS0205860(COG3640)	>HOLFODRAFT_RS0205865(COG1151)	>HOLFODRAFT_RS0205870(COG1614)	>HOLFODRAFT_RS0205875(COG1456)	>HOLFODRAFT_RS0205880(COG3894)	>HOLFODRAFT_RS0205885(COG3640)	>HOLFODRAFT_RS0205890(COG2069)	>HOLFODRAFT_RS0205895(COG1410)	>HOLFODRAFT_RS23845(COG2226)	>HOLFODRAFT_RS0205905(COG2226)	>HOLFODRAFT_RS19700(COG0535)	>HOLFODRAFT_RS0205915	>HOLFODRAFT_RS0205920(COG0596)	>HOLFODRAFT_RS0205925(COG0541)	>HOLFODRAFT_RS0205930(COG0228)	>HOLFODRAFT_RS0205935(COG1837)	>HOLFODRAFT_RS0205940(COG0806)
GCF_000243135.2_ASM24313v3_genomic.gff	-	871963	Desulfitobacterium dichloroeliminans LMG P-21439	Desulfitobacterium dichloroeliminans	Desulfitobacterium	Peptococcaceae	Clostridiales	Clostridia	Firmicutes	Bacteria	NC_019903.1	WP_015261186.1	F	F-1	DESDI_RS03145	>DESDI_RS03090(COG0491)	>DESDI_RS03095(COG1968)	>DESDI_RS03100(COG1704)	>DESDI_RS03105(COG1512)	>DESDI_RS03110(COG0011)	>DESDI_RS03115(COG0600)	>DESDI_RS03120(COG0715)	>DESDI_RS03125(COG1116)	>DESDI_RS03130(COG0664)	>DESDI_RS03135(COG3666)	>DESDI_RS03140(COG1142)	>DESDI_RS03145(COG1151)	>DESDI_RS03150(COG1251)
GCF_000243135.2_ASM24313v3_genomic.gff	-	871963	Desulfitobacterium dichloroeliminans LMG P-21439	Desulfitobacterium dichloroeliminans	Desulfitobacterium	Peptococcaceae	Clostridiales	Clostridia	Firmicutes	Bacteria	NC_019903.1	WP_015261453.1	D	D-1	DESDI_RS04500	>DESDI_RS04500(COG1151)
GCF_000243135.2_ASM24313v3_genomic.gff	-	871963	Desulfitobacterium dichloroeliminans LMG P-21439	Desulfitobacterium dichloroeliminans	Desulfitobacterium	Peptococcaceae	Clostridiales	Clostridia	Firmicutes	Bacteria	NC_019903.1	WP_015262357.1	F	F-1	DESDI_RS09295	<DESDI_RS09245(COG1236)	<DESDI_RS09250(COG2197)	<DESDI_RS09255(COG4585)	<DESDI_RS09260	<DESDI_RS09265(COG1410)	<DESDI_RS09270(COG2069)	<DESDI_RS09275(COG3640)	<DESDI_RS09280(COG3894)	<DESDI_RS09285(COG1456)	<DESDI_RS09290(COG1614)	<DESDI_RS09295(COG1151)	<DESDI_RS09300(COG3640)
GCF_000243155.2_ASM24315v3_genomic.gff	-	756499	Desulfitobacterium dehalogenans ATCC 51507	Desulfitobacterium dehalogenans	Desulfitobacterium	Peptococcaceae	Clostridiales	Clostridia	Firmicutes	Bacteria	NC_018017.1	WP_014793057.1	D	D-1	DESDE_RS05520	>DESDE_RS05520(COG1151)	>DESDE_RS05525(COG0664)
GCF_000243155.2_ASM24315v3_genomic.gff	-	756499	Desulfitobacterium dehalogenans ATCC 51507	Desulfitobacterium dehalogenans	Desulfitobacterium	Peptococcaceae	Clostridiales	Clostridia	Firmicutes	Bacteria	NC_018017.1	WP_014794088.1	F	F-1	DESDE_RS10985	<DESDE_RS10955(COG1410)	<DESDE_RS10960(COG2069)	<DESDE_RS10965(COG3640)	<DESDE_RS10970(COG3894)	<DESDE_RS10975(COG1456)	<DESDE_RS10980(COG1614)	<DESDE_RS10985(COG1151)	<DESDE_RS10990(COG3640)
GCF_000243155.2_ASM24315v3_genomic.gff	-	756499	Desulfitobacterium dehalogenans ATCC 51507	Desulfitobacterium dehalogenans	Desulfitobacterium	Peptococcaceae	Clostridiales	Clostridia	Firmicutes	Bacteria	NC_018017.1	WP_014795035.1	F	F-1	DESDE_RS15835	>DESDE_RS15820	>DESDE_RS15825(COG0664)	>DESDE_RS15830(COG1142)	>DESDE_RS15835(COG1151)	>DESDE_RS15840(COG3640)
GCF_000243455.1_ASM24345v2_genomic.gff	-	647171	Methanotorris formicicus Mc-S-70	Methanotorris formicicus	Methanotorris	Methanocaldococcaceae	Methanococcales	Methanococci	Euryarchaeota	Archaea	NZ_AGJL01000039.1	WP_048115732.1	C	C-3	METFODRAFT_RS07015	>METFODRAFT_RS10185	>METFODRAFT_RS06995	>METFODRAFT_RS07000	>METFODRAFT_RS07005(COG0655)	>METFODRAFT_RS07010(COG1036)	>METFODRAFT_RS07015(COG1151)	>METFODRAFT_RS07020(COG3259)	>METFODRAFT_RS07025(COG1941)	>METFODRAFT_RS07030(COG1035)	>METFODRAFT_RS07035(COG1059)
GCF_000243455.1_ASM24345v2_genomic.gff	-	647171	Methanotorris formicicus Mc-S-70	Methanotorris formicicus	Methanotorris	Methanocaldococcaceae	Methanococcales	Methanococci	Euryarchaeota	Archaea	NZ_AGJL01000053.1	WP_048115779.1	A	A-1	METFODRAFT_RS08115	<METFODRAFT_RS10275	<METFODRAFT_RS08100(COG1614)	<METFODRAFT_RS08105(COG1142)	<METFODRAFT_RS08110(COG1880)	<METFODRAFT_RS08115(COG1152)
GCF_000244875.1_ASM24487v1_genomic.gff	-	755731	Clostridium sp. BNL1100	Clostridium sp. BNL1100	Clostridium	Clostridiaceae	Clostridiales	Clostridia	Firmicutes	Bacteria	NC_016791.1	WP_014313043.1	B	B-1	CLO1100_RS06905	>CLO1100_RS06885(COG1191)	<CLO1100_RS06890(COG1116)	<CLO1100_RS06895(COG0600)	<CLO1100_RS06900(COG0715)	<CLO1100_RS06905(COG1151)
GCF_000244875.1_ASM24487v1_genomic.gff	-	755731	Clostridium sp. BNL1100	Clostridium sp. BNL1100	Clostridium	Clostridiaceae	Clostridiales	Clostridia	Firmicutes	Bacteria	NC_016791.1	WP_014315164.1	D	D-2	CLO1100_RS17820	>CLO1100_RS17820(COG1151)	>CLO1100_RS17825
GCF_000244895.1_ASM24489v1_genomic.gff	-	768710	Desulfosporosinus youngiae DSM 17734	Desulfosporosinus youngiae	Desulfosporosinus	Peptococcaceae	Clostridiales	Clostridia	Firmicutes	Bacteria	NZ_CM001441.1	WP_007778835.1	D	D-1	DESYODRAFT_RS02160	>DESYODRAFT_RS02160(COG1151)	>DESYODRAFT_RS02165(COG2759)
GCF_000244895.1_ASM24489v1_genomic.gff	-	768710	Desulfosporosinus youngiae DSM 17734	Desulfosporosinus youngiae	Desulfosporosinus	Peptococcaceae	Clostridiales	Clostridia	Firmicutes	Bacteria	NZ_CM001441.1	WP_007783360.1	F	F-1	DESYODRAFT_RS12170	>DESYODRAFT_RS12165(COG0664)	>DESYODRAFT_RS12170(COG1151)	>DESYODRAFT_RS12175(COG3640)
GCF_000244895.1_ASM24489v1_genomic.gff	-	768710	Desulfosporosinus youngiae DSM 17734	Desulfosporosinus youngiae	Desulfosporosinus	Peptococcaceae	Clostridiales	Clostridia	Firmicutes	Bacteria	NZ_CM001441.1	WP_007784227.1	F	F-1	DESYODRAFT_RS14400	<DESYODRAFT_RS14350(COG1236)	<DESYODRAFT_RS14355(COG2197)	<DESYODRAFT_RS14360(COG4585)	<DESYODRAFT_RS14365	<DESYODRAFT_RS14370(COG1410)	<DESYODRAFT_RS14375(COG2069)	<DESYODRAFT_RS14380(COG3640)	<DESYODRAFT_RS14385(COG3894)	<DESYODRAFT_RS14390(COG1456)	<DESYODRAFT_RS14395(COG1614)	<DESYODRAFT_RS14400(COG1151)	<DESYODRAFT_RS14405(COG3640)
GCF_000244895.1_ASM24489v1_genomic.gff	-	768710	Desulfosporosinus youngiae DSM 17734	Desulfosporosinus youngiae	Desulfosporosinus	Peptococcaceae	Clostridiales	Clostridia	Firmicutes	Bacteria	NZ_CM001441.1	WP_007785302.1	B	B-1	DESYODRAFT_RS18080	>DESYODRAFT_RS18080(COG1151)	>DESYODRAFT_RS18085
GCF_000246895.1_ASM24689v2_genomic.gff	-	545243	Clostridium arbusti SL206	Clostridium arbusti	Clostridium	Clostridiaceae	Clostridiales	Clostridia	Firmicutes	Bacteria	NZ_BAEV01000012.1	WP_010234217.1	E	E-1	RH99_RS03880	>RH99_RS03860(COG1905)	<RH99_RS03865(COG3640)	<RH99_RS03870(COG1034)	<RH99_RS03875(COG0437)	<RH99_RS03880(COG1151)	<RH99_RS03885(COG1894)
GCF_000246895.1_ASM24689v2_genomic.gff	-	545243	Clostridium arbusti SL206	Clostridium arbusti	Clostridium	Clostridiaceae	Clostridiales	Clostridia	Firmicutes	Bacteria	NZ_BAEV01000027.1	WP_010235777.1	C	C-1	RH99_RS06910	>RH99_RS06895(COG0018)	>RH99_RS06900	>RH99_RS06905(COG1959)	>RH99_RS06910(COG1151)	>RH99_RS06915(COG1251)	>RH99_RS06920(COG0663)	<RH99_RS06925(COG0474)
GCF_000247605.1_ASM24760v1_genomic.gff	-	931626	Acetobacterium woodii DSM 1030	Acetobacterium woodii	Acetobacterium	Eubacteriaceae	Clostridiales	Clostridia	Firmicutes	Bacteria	NC_016894.1	WP_014355463.1	E	E-1	AWO_RS05450	>AWO_RS05415(COG3640)	>AWO_RS05420(COG3894)	>AWO_RS05425	>AWO_RS05430	>AWO_RS05435(COG2069)	>AWO_RS05440(COG1456)	>AWO_RS05445(COG1410)	>AWO_RS05450(COG1151)	>AWO_RS05455(COG3640)	>AWO_RS05460(COG1614)	>AWO_RS05465	>AWO_RS05470	>AWO_RS05475	>AWO_RS05480	>AWO_RS05485(COG1876)
GCF_000247605.1_ASM24760v1_genomic.gff	-	931626	Acetobacterium woodii DSM 1030	Acetobacterium woodii	Acetobacterium	Eubacteriaceae	Clostridiales	Clostridia	Firmicutes	Bacteria	NC_016894.1	WP_014356284.1	C	C-1	AWO_RS09815	>AWO_RS09815(COG1151)	>AWO_RS09820(COG1142)	>AWO_RS09825(COG1251)	>AWO_RS09830(COG0652)
GCF_000253195.1_ASM25319v1_genomic.gff	-	941968	Clostridium botulinum H04402 065	Clostridium botulinum	Clostridium	Clostridiaceae	Clostridiales	Clostridia	Firmicutes	Bacteria	NC_017299.1	WP_014520465.1	C	C-1	H04402_RS06955	>H04402_RS06940(COG0020)	>H04402_RS18865	>H04402_RS06945	>H04402_RS06950(COG1959)	>H04402_RS06955(COG1151)	>H04402_RS06960(COG0437)	>H04402_RS06965(COG1251)
GCF_000253195.1_ASM25319v1_genomic.gff	-	941968	Clostridium botulinum H04402 065	Clostridium botulinum	Clostridium	Clostridiaceae	Clostridiales	Clostridia	Firmicutes	Bacteria	NC_017299.1	WP_014521084.1	D	D-1	H04402_RS10890	<H04402_RS10885(COG1063)	<H04402_RS10890(COG1151)	>H04402_RS10895(COG0375)	>H04402_RS10900(COG0378)
GCF_000255115.2_ASM25511v3_genomic.gff	-	646529	Desulfosporosinus acidiphilus SJ4	Desulfosporosinus acidiphilus	Desulfosporosinus	Peptococcaceae	Clostridiales	Clostridia	Firmicutes	Bacteria	NC_018068.1	WP_014825347.1	F	F-1	DESACI_RS01285	>DESACI_RS01275(COG1051)	<DESACI_RS01280(COG1251)	<DESACI_RS01285(COG1151)	<DESACI_RS01290(COG1142)	<DESACI_RS01295(COG2226)
GCF_000255115.2_ASM25511v3_genomic.gff	-	646529	Desulfosporosinus acidiphilus SJ4	Desulfosporosinus acidiphilus	Desulfosporosinus	Peptococcaceae	Clostridiales	Clostridia	Firmicutes	Bacteria	NC_018068.1	WP_014825781.1	D	D-1	DESACI_RS03460	>DESACI_RS03460(COG1151)	<DESACI_RS03465(COG1113)
GCF_000255115.2_ASM25511v3_genomic.gff	-	646529	Desulfosporosinus acidiphilus SJ4	Desulfosporosinus acidiphilus	Desulfosporosinus	Peptococcaceae	Clostridiales	Clostridia	Firmicutes	Bacteria	NC_018068.1	WP_014827878.1	F	F-1	DESACI_RS14160	<DESACI_RS14110(COG1236)	<DESACI_RS14115(COG2197)	<DESACI_RS14120(COG4585)	<DESACI_RS14125	<DESACI_RS14130(COG1410)	<DESACI_RS14135(COG2069)	<DESACI_RS14140(COG3640)	<DESACI_RS14145(COG3894)	<DESACI_RS14150(COG1456)	<DESACI_RS14155(COG1614)	<DESACI_RS14160(COG1151)	<DESACI_RS14165(COG3640)
GCF_000255615.2_ASM25561v3_genomic.gff	-	1138384	Ruminiclostridium thermocellum AD2	Ruminiclostridium thermocellum	Ruminiclostridium	Ruminococcaceae	Clostridiales	Clostridia	Firmicutes	Bacteria	NZ_CP013828.1	WP_003515288.1	B	B-1	AD2_RS01970	>AD2_RS01895(COG3894)	>AD2_RS01900(COG4887)	>AD2_RS01905(COG0715)	>AD2_RS01910(COG1116)	>AD2_RS01915(COG0600)	>AD2_RS01920(COG1541)	>AD2_RS01925(COG0436)	>AD2_RS01930(COG1014)	>AD2_RS01935(COG1144)	>AD2_RS01940(COG0674)	>AD2_RS01945(COG1013)	>AD2_RS01950	>AD2_RS01955(COG0251)	>AD2_RS01960(COG0626)	>AD2_RS01965(COG1168)	>AD2_RS01970(COG1151)	>AD2_RS01975(COG0715)	>AD2_RS01980(COG0600)	>AD2_RS01985(COG1116)
GCF_000257145.1_ASM25714v1_genomic.gff	-	1154769	Rubrivivax gelatinosus CBS	Rubrivivax gelatinosus	Rubrivivax	unclassified Burkholderiales	Burkholderiales	Betaproteobacteria	Proteobacteria	Bacteria	NZ_AJFF01000137.1	WP_043814147.1	F	F-1	IC33_RS10680	>IC33_RS10670(COG1142)	>IC33_RS10675	>IC33_RS10680(COG1151)	>IC33_RS10685(COG3640)	>IC33_RS10690	>IC33_RS28665	>IC33_RS10695(COG0378)	>IC33_RS10700
GCF_000257705.1_EsaburreumF0468v1.0_genomic.gff	-	1095750	Lachnoanaerobaculum saburreum F0468	Lachnoanaerobaculum saburreum	Lachnoanaerobaculum	Lachnospiraceae	Clostridiales	Clostridia	Firmicutes	Bacteria	NZ_AJGH01000125.1	WP_008754964.1	B	B-1	HMPREF9970_RS12585	>HMPREF9970_RS12585(COG1151)
GCF_000258725.1_ASM25872v1_genomic.gff	-	1136178	Parageobacillus thermoglucosidasius TNO-09.020	Parageobacillus thermoglucosidasius	Parageobacillus	Bacillaceae	Bacillales	Bacilli	Firmicutes	Bacteria	NZ_CM001483.1	WP_003250289.1	F	F-2	GT20_RS08580	>GT20_RS08575(COG3640)	>GT20_RS08580(COG1151)	>GT20_RS08585(COG1142)	>GT20_RS08590(COG0651)	>GT20_RS08595	>GT20_RS08600(COG4237)	>GT20_RS08605(COG0651)	>GT20_RS08610(COG1009)	>GT20_RS08615(COG3261)	>GT20_RS08620(COG1143)	>GT20_RS08625(COG3260)	>GT20_RS08630	>GT20_RS08635(COG0680)	>GT20_RS08640(COG0375)	>GT20_RS08645(COG0378)
GCF_000266945.1_ASM26694v1_genomic.gff	-	706587	Desulfomonile tiedjei DSM 6799	Desulfomonile tiedjei	Desulfomonile	Syntrophaceae	Syntrophobacterales	Deltaproteobacteria	Proteobacteria	Bacteria	NC_018025.1	WP_014808137.1	E	others	DESTI_RS29655	<DESTI_RS01150(COG1410)	<DESTI_RS01155(COG1456)	<DESTI_RS01160(COG1614)	<DESTI_RS29655(COG1151)	<DESTI_RS01175	<DESTI_RS01180(COG0119)
GCF_000271545.1_Pelosinus.strA11_v1.0_genomic.gff	-	1149860	Pelosinus fermentans A11	Pelosinus fermentans	Pelosinus	Sporomusaceae	Selenomonadales	Negativicutes	Firmicutes	Bacteria	NZ_AKVM01000011.1	WP_007930357.1	D	D-2	FA11_RS00240	<FA11_RS23530	<FA11_RS00240(COG1151)
GCF_000271545.1_Pelosinus.strA11_v1.0_genomic.gff	-	1149860	Pelosinus fermentans A11	Pelosinus fermentans	Pelosinus	Sporomusaceae	Selenomonadales	Negativicutes	Firmicutes	Bacteria	NZ_AKVM01000022.1	WP_007938034.1	F	F-1	FA11_RS03505	<FA11_RS03485(COG0600)	<FA11_RS03490(COG1116)	<FA11_RS03495(COG0715)	<FA11_RS03500(COG3640)	<FA11_RS03505(COG1151)	<FA11_RS03510(COG0664)	<FA11_RS03515(COG2217)	<FA11_RS03520(COG1846)
GCF_000271665.2_ASM27166v2_genomic.gff	-	1192197	Pelosinus fermentans JBW45	Pelosinus fermentans	Pelosinus	Sporomusaceae	Selenomonadales	Negativicutes	Firmicutes	Bacteria	NZ_CP010978.1	WP_007960898.1	F	F-1	JBW_RS00540	>JBW_RS00525(COG1846)	>JBW_RS00530(COG2217)	>JBW_RS00535(COG0664)	>JBW_RS00540(COG1151)	>JBW_RS00545(COG3640)	>JBW_RS00550(COG0715)	>JBW_RS00555(COG1116)	>JBW_RS00560(COG0600)
GCF_000271665.2_ASM27166v2_genomic.gff	-	1192197	Pelosinus fermentans JBW45	Pelosinus fermentans	Pelosinus	Sporomusaceae	Selenomonadales	Negativicutes	Firmicutes	Bacteria	NZ_CP010978.1	WP_036681862.1	D	D-2	JBW_RS21210	>JBW_RS21210(COG1151)
GCF_000275865.1_ASM27586v1_genomic.gff	-	28892	Methanofollis liminatans DSM 4140	Methanofollis liminatans	Methanofollis	Methanomicrobiaceae	Methanomicrobiales	Methanomicrobia	Euryarchaeota	Archaea	NZ_CM001555.1	WP_004037068.1	D	D-1	METLI_RS00430	<METLI_RS00425(COG1917)	<METLI_RS00430(COG1151)
GCF_000275865.1_ASM27586v1_genomic.gff	-	28892	Methanofollis liminatans DSM 4140	Methanofollis liminatans	Methanofollis	Methanomicrobiaceae	Methanomicrobiales	Methanomicrobia	Euryarchaeota	Archaea	NZ_CM001555.1	WP_004039985.1	E	E-2	METLI_RS09865	<METLI_RS09845(COG2899)	<METLI_RS09850(COG3467)	<METLI_RS09855	<METLI_RS09860(COG3640)	<METLI_RS09865(COG1151)	<METLI_RS09870(COG1167)	>METLI_RS09875(COG1028)
GCF_000280535.1_CloBeiG117_1.0_genomic.gff	-	1200349	Clostridium beijerinckii G117	Clostridium beijerinckii	Clostridium	Clostridiaceae	Clostridiales	Clostridia	Firmicutes	Bacteria	NZ_AKWA01000032.1	WP_017209211.1	D	D-1	A599_RS0102740	<A599_RS0102720(COG0664)	>A599_RS0102725(COG0426)	<A599_RS0102730(COG0426)	<A599_RS0102735(COG1251)	>A599_RS0102740(COG1151)
GCF_000280535.1_CloBeiG117_1.0_genomic.gff	-	1200349	Clostridium beijerinckii G117	Clostridium beijerinckii	Clostridium	Clostridiaceae	Clostridiales	Clostridia	Firmicutes	Bacteria	NZ_AKWA01000101.1	WP_017209939.1	C	C-1	A599_RS0107480	>A599_RS0107475(COG1959)	>A599_RS0107480(COG1151)	<A599_RS0107485(COG0426)
GCF_000285855.1_ASM28585v2_genomic.gff	-	1095771	Ruminococcus sp. JC304	Ruminococcus sp. JC304	Ruminococcus	Ruminococcaceae	Clostridiales	Clostridia	Firmicutes	Bacteria	NZ_HE978651.1	WP_019161838.1	E	E-1	HGRM_RS08365	<HGRM_RS08335(COG3894)	<HGRM_RS08340(COG1410)	<HGRM_RS08345(COG1456)	<HGRM_RS08350(COG2069)	<HGRM_RS08355(COG1614)	<HGRM_RS08360(COG3640)	<HGRM_RS08365(COG1151)	<HGRM_RS21965	<HGRM_RS08375(COG3640)	<HGRM_RS08380	<HGRM_RS08385
GCF_000286635.1_VspACP1v1.0_genomic.gff	-	936588	Veillonella sp. ACP1	Veillonella sp. ACP1	Veillonella	Veillonellaceae	Veillonellales	Negativicutes	Firmicutes	Bacteria	NZ_ALKL01000024.1	WP_009661828.1	B	B-1	HMPREF1151_RS08400	>HMPREF1151_RS08400(COG1151)
GCF_000287655.1_SspFOBRC9v1.0_genomic.gff	-	936573	Selenomonas sp. FOBRC9	Selenomonas sp. FOBRC9	Selenomonas	Selenomonadaceae	Selenomonadales	Negativicutes	Firmicutes	Bacteria	NZ_ALJR01000014.1	WP_009657749.1	B	B-1	HMPREF1147_RS03650	>HMPREF1147_RS03650(COG1151)	>HMPREF1147_RS03655
GCF_000287675.1_LspICM7v1.0_genomic.gff	-	936594	Lachnoanaerobaculum sp. ICM7	Lachnoanaerobaculum sp. ICM7	Lachnoanaerobaculum	Lachnospiraceae	Clostridiales	Clostridia	Firmicutes	Bacteria	NZ_ALJL01000023.1	WP_035620115.1	B	B-1	HMPREF1140_RS07255	<HMPREF1140_RS07255(COG1151)	<HMPREF1140_RS07260(COG2025)	<HMPREF1140_RS07265(COG2086)	<HMPREF1140_RS07270(COG1960)	<HMPREF1140_RS07275(COG1250)	<HMPREF1140_RS07280(COG1024)
GCF_000287855.1_CspFOBRC14v1.0_genomic.gff	-	936554	Campylobacter sp. FOBRC14	Campylobacter sp. FOBRC14	Campylobacter	Campylobacteraceae	Campylobacterales	Epsilonproteobacteria	Proteobacteria	Bacteria	NZ_ALJJ01000007.1	WP_009649622.1	B	B-2	HMPREF1139_RS01850	<HMPREF1139_RS01835(COG1116)	<HMPREF1139_RS01840(COG0600)	<HMPREF1139_RS01845(COG0715)	>HMPREF1139_RS01850(COG1151)
GCF_000292955.1_SspCM52v1.0_genomic.gff	-	936381	Selenomonas sp. CM52	Selenomonas sp. CM52	Selenomonas	Selenomonadaceae	Selenomonadales	Negativicutes	Firmicutes	Bacteria	NZ_ALNM01000027.1	WP_083847472.1	B	B-1	HMPREF1153_RS06385	<HMPREF1153_RS06370(COG1116)	<HMPREF1153_RS06375(COG0600)	<HMPREF1153_RS06380(COG0715)	<HMPREF1153_RS06385(COG1151)
GCF_000296385.1_Clos_bact_OBRC5-5_V1_genomic.gff	-	936595	Lachnoanaerobaculum sp. OBRC5-5	Lachnoanaerobaculum sp. OBRC5-5	Lachnoanaerobaculum	Lachnospiraceae	Clostridiales	Clostridia	Firmicutes	Bacteria	NZ_JH815185.1	WP_034243186.1	B	B-1	HMPREF1135_RS11835	>HMPREF1135_RS11810(COG1024)	>HMPREF1135_RS11815(COG1250)	>HMPREF1135_RS11820(COG1960)	>HMPREF1135_RS11825(COG2086)	>HMPREF1135_RS11830(COG2025)	>HMPREF1135_RS11835(COG1151)
GCF_000296795.1_ASM29679v1_genomic.gff	MAG	247490	Candidatus Jettenia caeni	Candidatus Jettenia caeni	Candidatus Jettenia	Candidatus Brocadiaceae	Candidatus Brocadiales	Planctomycetia	Planctomycetes	Bacteria	NZ_BAFH01000004.1	WP_007222622.1	E	E-1	KSU1_RS13680	<KSU1_RS13640(COG0824)	<KSU1_RS13645(COG1410)	<KSU1_RS13650(COG2069)	<KSU1_RS13655(COG3640)	<KSU1_RS13660(COG3894)	<KSU1_RS13665(COG1456)	<KSU1_RS13670(COG0740)	<KSU1_RS13675(COG1614)	<KSU1_RS13680(COG1151)	<KSU1_RS13685(COG3640)	<KSU1_RS13690	<KSU1_RS18655(COG2199)	<KSU1_RS13700(COG0113)
GCF_000297095.1_ASM29709v1_genomic.gff	-	717227	Treponema primitia ZAS-1	Treponema primitia	Treponema	Spirochaetaceae	Spirochaetales	Spirochaetia	Spirochaetes	Bacteria	NZ_AEEA01000036.1	WP_010256010.1	C	C-1	TPRIMZ1_RS0105275	<TPRIMZ1_RS0105220(COG2768)	<TPRIMZ1_RS0105225(COG0627)	<TPRIMZ1_RS0105230(COG0008)	<TPRIMZ1_RS0105235	<TPRIMZ1_RS0105240(COG1181)	<TPRIMZ1_RS0105245(COG0770)	<TPRIMZ1_RS0105250(COG0596)	<TPRIMZ1_RS0105255(COG1288)	<TPRIMZ1_RS0105260(COG1473)	<TPRIMZ1_RS0105265(COG1251)	<TPRIMZ1_RS0105270(COG1142)	<TPRIMZ1_RS0105275(COG1151)	<TPRIMZ1_RS0105280(COG0459)	>TPRIMZ1_RS0105285(COG1063)	>TPRIMZ1_RS0105290(COG0673)
GCF_000297095.1_ASM29709v1_genomic.gff	-	717227	Treponema primitia ZAS-1	Treponema primitia	Treponema	Spirochaetaceae	Spirochaetales	Spirochaetia	Spirochaetes	Bacteria	NZ_AEEA01000070.1	WP_010260368.1	E	E-1	TPRIMZ1_RS0112780	<TPRIMZ1_RS0112755(COG1410)	<TPRIMZ1_RS0112760(COG1456)	<TPRIMZ1_RS0112765(COG2069)	<TPRIMZ1_RS0112770(COG1614)	<TPRIMZ1_RS0112775(COG3640)	<TPRIMZ1_RS0112780(COG1151)
GCF_000299355.1_ASM29935v1_genomic.gff	-	1128398	Gottschalkia acidurici 9a	Gottschalkia acidurici	Gottschalkia	Gottschalkiaceae	Tissierellales	Tissierellia	Firmicutes	Bacteria	NC_018664.1	WP_014966854.1	D	D-2	CURI_RS03250	>CURI_RS03250(COG1151)
GCF_000300195.1_ASM30019v1_genomic.gff	-	1233099	Clostridium tunisiense TJ	Clostridium tunisiense	Clostridium	Clostridiaceae	Clostridiales	Clostridia	Firmicutes	Bacteria	NZ_AMQH01000004.1	WP_017413796.1	D	D-1	C661_RS0102910	>C661_RS0102895(COG1251)	>C661_RS0102900(COG5460)	>C661_RS0102905	>C661_RS0102910(COG1151)	>C661_RS0102915(COG0662)
GCF_000302455.1_ASM30245v1_genomic.gff	-	1204725	Methanobacterium formicicum DSM 3637	Methanobacterium formicicum	Methanobacterium	Methanobacteriaceae	Methanobacteriales	Methanobacteria	Euryarchaeota	Archaea	NZ_AMPO01000005.1	WP_004030694.1	A	A-1	A994_RS07015	>A994_RS07015(COG1152)	>A994_RS07020(COG1880)	>A994_RS07025(COG1614)	>A994_RS07030(COG3640)	>A994_RS07035(COG2069)	>A994_RS07040(COG1456)	>A994_RS07045(COG1142)
GCF_000304355.2_Mb_MS2_genomic.gff	-	1201294	Methanoculleus bourgensis MS2	Methanoculleus bourgensis	Methanoculleus	Methanomicrobiaceae	Methanomicrobiales	Methanomicrobia	Euryarchaeota	Archaea	NC_018227.2	WP_048105293.1	D	D-1	BN140_RS11225	>BN140_RS11220(COG3189)	>BN140_RS11225(COG1151)
GCF_000305775.1_ASM30577v1_genomic.gff	-	1147129	Dehalobacter sp. DCA	Dehalobacter sp. DCA	Dehalobacter	Peptococcaceae	Clostridiales	Clostridia	Firmicutes	Bacteria	NC_018866.1	WP_015042303.1	E	E-1	DHBDCA_RS01165	<DHBDCA_RS01120	<DHBDCA_RS01125(COG1532)	<DHBDCA_RS01130(COG3894)	<DHBDCA_RS01135(COG1614)	<DHBDCA_RS01140(COG1410)	<DHBDCA_RS01145(COG1456)	<DHBDCA_RS01150(COG2069)	<DHBDCA_RS01155(COG3640)	<DHBDCA_RS01160(COG3640)	<DHBDCA_RS01165(COG1151)
GCF_000305815.1_ASM30581v1_genomic.gff	-	1131462	Dehalobacter sp. CF	Dehalobacter sp. CF	Dehalobacter	Peptococcaceae	Clostridiales	Clostridia	Firmicutes	Bacteria	NC_018867.1	WP_015042303.1	E	E-1	DCF50_RS01460	<DCF50_RS01415	<DCF50_RS01420(COG1532)	<DCF50_RS01425(COG3894)	<DCF50_RS01430(COG1614)	<DCF50_RS01435(COG1410)	<DCF50_RS01440(COG1456)	<DCF50_RS01445(COG2069)	<DCF50_RS01450(COG3640)	<DCF50_RS01455(COG3640)	<DCF50_RS01460(COG1151)
GCF_000305935.1_ASM30593v1_genomic.gff	-	1089553	Thermacetogenium phaeum DSM 12270	Thermacetogenium phaeum	Thermacetogenium	Thermoanaerobacteraceae	Thermoanaerobacterales	Clostridia	Firmicutes	Bacteria	NC_018870.1	WP_028991121.1	E	E-1	TPH_RS02900	>TPH_RS02880(COG1344)	>TPH_RS02885(COG1699)	>TPH_RS02890(COG1551)	>TPH_RS02895(COG0437)	>TPH_RS02900(COG1151)	>TPH_RS02905(COG1381)	>TPH_RS02910
GCF_000305935.1_ASM30593v1_genomic.gff	-	1089553	Thermacetogenium phaeum DSM 12270	Thermacetogenium phaeum	Thermacetogenium	Thermoanaerobacteraceae	Thermoanaerobacterales	Clostridia	Firmicutes	Bacteria	NC_018870.1	WP_015050605.1	F	F-1	TPH_RS07585	<TPH_RS07530(COG0436)	<TPH_RS07535	<TPH_RS07540(COG1148)	<TPH_RS07545(COG0685)	<TPH_RS07550	<TPH_RS07555(COG1908)	<TPH_RS07560(COG1410)	<TPH_RS07565(COG2069)	<TPH_RS07570(COG3640)	<TPH_RS07575(COG1456)	<TPH_RS07580(COG1614)	<TPH_RS07585(COG1151)	<TPH_RS07590(COG3640)
GCF_000306725.1_ASM30672v1_genomic.gff	-	1094980	Methanolobus psychrophilus R15	Methanolobus psychrophilus	Methanolobus	Methanosarcinaceae	Methanosarcinales	Methanomicrobia	Euryarchaeota	Archaea	NC_018876.1	WP_048147434.1	D	D-1	MPSY_RS03140	<MPSY_RS03125	<MPSY_RS03130(COG1983)	<MPSY_RS03135	<MPSY_RS03140(COG1151)
GCF_000306725.1_ASM30672v1_genomic.gff	-	1094980	Methanolobus psychrophilus R15	Methanolobus psychrophilus	Methanolobus	Methanosarcinaceae	Methanosarcinales	Methanomicrobia	Euryarchaeota	Archaea	NC_018876.1	WP_015054797.1	A	A-1	MPSY_RS13530	<MPSY_RS13500	<MPSY_RS13505(COG1456)	<MPSY_RS13510(COG2069)	<MPSY_RS13515(COG3640)	<MPSY_RS13520(COG1614)	<MPSY_RS13525(COG1880)	<MPSY_RS13530(COG1152)
GCF_000307105.1_ASM30710v1_genomic.gff	-	651182	Desulfobacula toluolica Tol2	Desulfobacula toluolica	Desulfobacula	Desulfobacteraceae	Desulfobacterales	Deltaproteobacteria	Proteobacteria	Bacteria	NC_018645.1	WP_014955627.1	E	E-1	TOL2_RS00570	<TOL2_RS00570(COG1151)
GCF_000307105.1_ASM30710v1_genomic.gff	-	651182	Desulfobacula toluolica Tol2	Desulfobacula toluolica	Desulfobacula	Desulfobacteraceae	Desulfobacterales	Deltaproteobacteria	Proteobacteria	Bacteria	NC_018645.1	WP_014956692.1	E	E-1	TOL2_RS06380	<TOL2_RS06355(COG3640)	<TOL2_RS06360	<TOL2_RS06365(COG1410)	<TOL2_RS06370(COG1456)	<TOL2_RS06375(COG1614)	<TOL2_RS06380(COG1151)	<TOL2_RS06385(COG2069)	>TOL2_RS06390(COG2759)	<TOL2_RS06395(COG0190)	<TOL2_RS06400(COG3404)	>TOL2_RS23505(COG0642)
GCF_000307105.1_ASM30710v1_genomic.gff	-	651182	Desulfobacula toluolica Tol2	Desulfobacula toluolica	Desulfobacula	Desulfobacteraceae	Desulfobacterales	Deltaproteobacteria	Proteobacteria	Bacteria	NC_018645.1	WP_014959149.1	E	E-1	TOL2_RS20285	<TOL2_RS20280(COG1251)	<TOL2_RS20285(COG1151)	<TOL2_RS20290(COG1142)	<TOL2_RS20295(COG0318)
GCF_000309315.1_ASM30931v1_genomic.gff	MAG	304766	Sedimentibacter sp. B4	Sedimentibacter sp. B4	Sedimentibacter	unclassified Tissierellia	unclassified Tissierellia	Tissierellia	Firmicutes	Bacteria	NZ_CANG01000038.1	WP_019228714.1	D	D-1	BN358_RS08020	<BN358_RS08015(COG1309)	<BN358_RS08020(COG1151)	<BN358_RS22815(COG0642)	<BN358_RS08030	<BN358_RS08035	<BN358_RS08040	<BN358_RS08045	<BN358_RS08050	<BN358_RS08055	<BN358_RS08060	<BN358_RS08065(COG2197)
GCF_000315365.1_ASM31536v1_genomic.gff	-	1121428	Desulfotomaculum hydrothermale Lam5 = DSM 18033	Desulfotomaculum hydrothermale	Desulfotomaculum	Peptococcaceae	Clostridiales	Clostridia	Firmicutes	Bacteria	NZ_CAOS01000012.1	WP_008412343.1	D	D-2	DESHY_RS09645	<DESHY_RS09640(COG1301)	<DESHY_RS09645(COG1151)	<DESHY_RS09650(COG0664)	<DESHY_RS09655(COG2227)
GCF_000317005.1_Hcf1DRAFT_genomic.gff	-	1235479	Pelosinus sp. HCF1	Pelosinus sp. HCF1	Pelosinus	Sporomusaceae	Selenomonadales	Negativicutes	Firmicutes	Bacteria	NZ_AMZI01000007.1	WP_007930357.1	D	D-2	HCF1DRAFT_RS0102275	<HCF1DRAFT_RS25210	<HCF1DRAFT_RS0102275(COG1151)
GCF_000317005.1_Hcf1DRAFT_genomic.gff	-	1235479	Pelosinus sp. HCF1	Pelosinus sp. HCF1	Pelosinus	Sporomusaceae	Selenomonadales	Negativicutes	Firmicutes	Bacteria	NZ_AMZI01000031.1	WP_007938034.1	F	F-1	HCF1DRAFT_RS0108895	>HCF1DRAFT_RS0108880(COG1846)	>HCF1DRAFT_RS0108885(COG2217)	>HCF1DRAFT_RS0108890(COG0664)	>HCF1DRAFT_RS0108895(COG1151)	>HCF1DRAFT_RS0108900(COG3640)	>HCF1DRAFT_RS0108905(COG0715)	>HCF1DRAFT_RS0108910(COG1116)	>HCF1DRAFT_RS0108915(COG0600)
GCF_000318355.2_ASM31835v2_genomic.gff	-	1128111	Veillonella atypica KON	Veillonella atypica	Veillonella	Veillonellaceae	Veillonellales	Negativicutes	Firmicutes	Bacteria	NZ_KB291594.1	WP_005381535.1	B	B-1	HMPREF0870_RS08275	>HMPREF0870_RS08275(COG1151)
GCF_000327045.1_ASM32704v1_genomic.gff	-	765912	Thioflavicoccus mobilis 8321	Thioflavicoccus mobilis	Thioflavicoccus	Chromatiaceae	Chromatiales	Gammaproteobacteria	Proteobacteria	Bacteria	NC_019940.1	WP_015279245.1	B	B-3	THIMO_RS01070	>THIMO_RS01070(COG1151)	>THIMO_RS01075(COG0715)	>THIMO_RS01080(COG0600)	>THIMO_RS01085(COG1116)
GCF_000327485.1_ASM32748v1_genomic.gff	-	593750	Methanoregula formicica SMSP	Methanoregula formicica	Methanoregula	Methanoregulaceae	Methanomicrobiales	Methanomicrobia	Euryarchaeota	Archaea	NC_019943.1	WP_015285711.1	A	A-1	METFOR_RS08460	<METFOR_RS08425	<METFOR_RS08430(COG2226)	<METFOR_RS08435(COG3894)	<METFOR_RS08440(COG1456)	<METFOR_RS08445(COG2069)	<METFOR_RS08450(COG1614)	<METFOR_RS08455(COG1880)	<METFOR_RS08460(COG1152)
GCF_000328625.1_ASM32862v1_genomic.gff	-	748449	Halobacteroides halobius DSM 5150	Halobacteroides halobius	Halobacteroides	Halobacteroidaceae	Halanaerobiales	Clostridia	Firmicutes	Bacteria	NC_019978.1	WP_015326903.1	D	D-1	HALHA_RS06065	>HALHA_RS06055(COG1251)	<HALHA_RS06060(COG3404)	<HALHA_RS06065(COG1151)	>HALHA_RS06070(COG0840)
GCF_000328665.1_ASM32866v1_genomic.gff	-	867904	Methanomethylovorans hollandica DSM 15978	Methanomethylovorans hollandica	Methanomethylovorans	Methanosarcinaceae	Methanosarcinales	Methanomicrobia	Euryarchaeota	Archaea	NC_019977.1	WP_015324381.1	A	A-1	METHO_RS04695	>METHO_RS04695(COG1152)	>METHO_RS04700(COG1880)	>METHO_RS04705(COG1614)	>METHO_RS04710(COG3640)	>METHO_RS04715(COG2069)	>METHO_RS04720(COG1456)	>METHO_RS04725
GCF_000328665.1_ASM32866v1_genomic.gff	-	867904	Methanomethylovorans hollandica DSM 15978	Methanomethylovorans hollandica	Methanomethylovorans	Methanosarcinaceae	Methanosarcinales	Methanomicrobia	Euryarchaeota	Archaea	NC_019977.1	WP_015324787.1	D	D-1	METHO_RS06740	<METHO_RS06735	<METHO_RS06740(COG1151)
GCF_000328765.2_ASM32876v2_genomic.gff	-	1209989	Tepidanaerobacter acetatoxydans Re1	Tepidanaerobacter acetatoxydans	Tepidanaerobacter	Thermoanaerobacteraceae	Thermoanaerobacterales	Clostridia	Firmicutes	Bacteria	NC_019954.2	WP_013777659.1	E	E-3	TEPIRE1_RS02730	<TEPIRE1_RS02720(COG0673)	>TEPIRE1_RS02725(COG0437)	>TEPIRE1_RS02730(COG1151)	>TEPIRE1_RS02735(COG3640)	>TEPIRE1_RS02740(COG2759)	>TEPIRE1_RS02745(COG1810)	>TEPIRE1_RS02750(COG3404)	>TEPIRE1_RS02755	>TEPIRE1_RS02760	>TEPIRE1_RS02765(COG0685)	>TEPIRE1_RS02770(COG1249)	>TEPIRE1_RS02775(COG3640)	>TEPIRE1_RS02780(COG2069)	>TEPIRE1_RS02785(COG1456)	>TEPIRE1_RS02790(COG1410)	>TEPIRE1_RS02795(COG1614)	>TEPIRE1_RS02800(COG0509)	>TEPIRE1_RS02805(COG3894)
GCF_000330945.1_Cpasteurianum_V1_genomic.gff	-	1262449	Clostridium pasteurianum DSM 525 = ATCC 6013	Clostridium pasteurianum	Clostridium	Clostridiaceae	Clostridiales	Clostridia	Firmicutes	Bacteria	NZ_ANZB01000001.1	WP_004455190.1	C	C-1	F502_RS01895	<F502_RS19990	<F502_RS01895(COG1151)
GCF_000330945.1_Cpasteurianum_V1_genomic.gff	-	1262449	Clostridium pasteurianum DSM 525 = ATCC 6013	Clostridium pasteurianum	Clostridium	Clostridiaceae	Clostridiales	Clostridia	Firmicutes	Bacteria	NZ_ANZB01000008.1	WP_087946548.1	E	E-1	F502_RS12565	>F502_RS12560(COG1894)	>F502_RS12565(COG1151)	>F502_RS12570(COG1142)	>F502_RS12575(COG1034)	>F502_RS12580(COG3640)	<F502_RS12585(COG1905)
GCF_000331515.1_Photobacterium_marinum_AK15_genomic.gff	-	1056511	Photobacterium marinum	Photobacterium marinum	Photobacterium	Vibrionaceae	Vibrionales	Gammaproteobacteria	Proteobacteria	Bacteria	NZ_AMZO01000026.1	WP_036800850.1	F	F-1	C942_RS17450	<C942_RS17425(COG0409)	<C942_RS17430(COG0298)	<C942_RS17435(COG0378)	<C942_RS17440	<C942_RS17445(COG3640)	<C942_RS17450(COG1151)	<C942_RS17455(COG1142)	<C942_RS17460(COG0375)	<C942_RS17465(COG2370)	>C942_RS17470(COG0651)	>C942_RS17475(COG0650)	>C942_RS17480(COG3260)	>C942_RS17485(COG1143)	>C942_RS17490(COG0852)	>C942_RS17495(COG3261)	>C942_RS17500(COG0664)
GCF_000331995.1_ASM33199v1_genomic.gff	-	1121335	[Clostridium] stercorarium subsp. stercorarium DSM 8532	[Clostridium] stercorarium	Ruminiclostridium	Ruminococcaceae	Clostridiales	Clostridia	Firmicutes	Bacteria	NC_020134.1	WP_015359619.1	B	B-2	CST_RS09190	<CST_RS09170(COG2226)	<CST_RS09175(COG1116)	<CST_RS09180(COG0600)	<CST_RS09185(COG0715)	<CST_RS09190(COG1151)
GCF_000332015.1_1st_assembly_genomic.gff	-	1212547	Clostridium tyrobutyricum UC7086	Clostridium tyrobutyricum	Clostridium	Clostridiaceae	Clostridiales	Clostridia	Firmicutes	Bacteria	NZ_ANOE01000079.1	WP_017752626.1	C	C-1	B380_RS0111590	<B380_RS0111590(COG1151)
GCF_000340885.1_ASM34088v1_genomic.gff	-	931276	Clostridium saccharoperbutylacetonicum N1-4(HMT)	Clostridium saccharoperbutylacetonicum	Clostridium	Clostridiaceae	Clostridiales	Clostridia	Firmicutes	Bacteria	NC_020291.1	WP_015391765.1	D	D-1	CSPA_RS08195	<CSPA_RS08195(COG1151)	>CSPA_RS08200(COG0531)	>CSPA_RS08205(COG0531)
GCF_000340885.1_ASM34088v1_genomic.gff	-	931276	Clostridium saccharoperbutylacetonicum N1-4(HMT)	Clostridium saccharoperbutylacetonicum	Clostridium	Clostridiaceae	Clostridiales	Clostridia	Firmicutes	Bacteria	NC_020291.1	WP_015392198.1	F	F-2	CSPA_RS10325	<CSPA_RS10315(COG3640)	<CSPA_RS10320	<CSPA_RS10325(COG1151)	<CSPA_RS10330(COG1142)	<CSPA_RS10335(COG3829)
GCF_000340885.1_ASM34088v1_genomic.gff	-	931276	Clostridium saccharoperbutylacetonicum N1-4(HMT)	Clostridium saccharoperbutylacetonicum	Clostridium	Clostridiaceae	Clostridiales	Clostridia	Firmicutes	Bacteria	NC_020291.1	WP_015395795.1	C	C-1	CSPA_RS28015	>CSPA_RS28015(COG1151)	>CSPA_RS28020(COG4260)	>CSPA_RS28025	>CSPA_RS28030	>CSPA_RS28035	<CSPA_RS28040(COG1879)
GCF_000341395.1_ASM34139v1_genomic.gff	-	1167006	Desulfocapsa sulfexigens DSM 10523	Desulfocapsa sulfexigens	Desulfocapsa	Desulfobulbaceae	Desulfobacterales	Deltaproteobacteria	Proteobacteria	Bacteria	NC_020304.1	WP_015403546.1	E	E-1	UWK_RS06435	>UWK_RS06425(COG0642)	<UWK_RS06435(COG1151)	<UWK_RS06440(COG0664)
GCF_000341395.1_ASM34139v1_genomic.gff	-	1167006	Desulfocapsa sulfexigens DSM 10523	Desulfocapsa sulfexigens	Desulfocapsa	Desulfobulbaceae	Desulfobacterales	Deltaproteobacteria	Proteobacteria	Bacteria	NC_020304.1	WP_015405375.1	E	E-3	UWK_RS15700	<UWK_RS19125(COG1908)	<UWK_RS19130(COG1908)	<UWK_RS15665(COG1148)	<UWK_RS19135(COG3383)	<UWK_RS15685(COG1456)	<UWK_RS15690(COG1614)	<UWK_RS15695(COG2069)	<UWK_RS15700(COG1151)	<UWK_RS15705(COG0190)
GCF_000341895.1_ASM34189v1_genomic.gff	-	1322246	Pseudodesulfovibrio piezophilus C1TLV30	Pseudodesulfovibrio piezophilus	Pseudodesulfovibrio	Desulfovibrionaceae	Desulfovibrionales	Deltaproteobacteria	Proteobacteria	Bacteria	NC_020409.1	WP_015415039.1	E	E-2	BN4_RS08835	>BN4_RS08830(COG0664)	>BN4_RS08835(COG1151)	>BN4_RS08840(COG3640)
GCF_000341895.1_ASM34189v1_genomic.gff	-	1322246	Pseudodesulfovibrio piezophilus C1TLV30	Pseudodesulfovibrio piezophilus	Pseudodesulfovibrio	Desulfovibrionaceae	Desulfovibrionales	Deltaproteobacteria	Proteobacteria	Bacteria	NC_020409.1	WP_015416294.1	F	F-1	BN4_RS15180	<BN4_RS15175(COG3640)	<BN4_RS15180(COG1151)	<BN4_RS15185(COG1142)	<BN4_RS15190(COG0375)	<BN4_RS15195(COG3261)	<BN4_RS15200	<BN4_RS15205(COG1143)	<BN4_RS15210(COG3260)	<BN4_RS15215(COG0650)	<BN4_RS15220(COG0651)	<BN4_RS15225(COG0664)	<BN4_RS15230(COG0840)	<BN4_RS15235(COG0655)
GCF_000344315.1_ASM34431v1_genomic.gff	-	1262666	Desulfovibrio africanus PCS	Desulfovibrio africanus	Desulfovibrio	Desulfovibrionaceae	Desulfovibrionales	Deltaproteobacteria	Proteobacteria	Bacteria	NZ_AOSV01000003.1	WP_005983997.1	E	E-2	PCS_RS03195	>PCS_RS03185(COG0361)	>PCS_RS03190(COG0664)	>PCS_RS03195(COG1151)	>PCS_RS03200(COG3640)	>PCS_RS03205	>PCS_RS03210(COG4095)	>PCS_RS03215
GCF_000349885.2_ASM34988v2_genomic.gff	-	1121335	[Clostridium] stercorarium subsp. stercorarium DSM 8532	[Clostridium] stercorarium	Ruminiclostridium	Ruminococcaceae	Clostridiales	Clostridia	Firmicutes	Bacteria	NC_020887.2	WP_015485077.1	B	B-2	CLST_RS09175	<CLST_RS09155(COG2226)	<CLST_RS09160(COG1116)	<CLST_RS09165(COG0600)	<CLST_RS09170(COG0715)	<CLST_RS09175(COG1151)
GCF_000350485.1_C.termitidis_454_shotgun_Newbler_genomic.gff	-	1195236	[Clostridium] termitidis CT1112	[Clostridium] termitidis	Ruminiclostridium	Ruminococcaceae	Clostridiales	Clostridia	Firmicutes	Bacteria	NZ_AORV01000028.1	WP_004625251.1	B	B-1	CTER_RS09605	>CTER_RS09605(COG1151)	>CTER_RS09610(COG0715)	>CTER_RS09615(COG0600)	>CTER_RS09620(COG1116)	<CTER_RS09625(COG1191)
GCF_000350485.1_C.termitidis_454_shotgun_Newbler_genomic.gff	-	1195236	[Clostridium] termitidis CT1112	[Clostridium] termitidis	Ruminiclostridium	Ruminococcaceae	Clostridiales	Clostridia	Firmicutes	Bacteria	NZ_AORV01000046.1	WP_004627750.1	D	D-2	CTER_RS17260	>CTER_RS17260(COG1151)
GCF_000350545.1_DPO2_genomic.gff	-	1286635	Desulfotignum phosphitoxidans DSM 13687	Desulfotignum phosphitoxidans	Desulfotignum	Desulfobacteraceae	Desulfobacterales	Deltaproteobacteria	Proteobacteria	Bacteria	NZ_APJX01000002.1	WP_006964991.1	E	E-1	DPO_RS06630	<DPO_RS23755(COG0642)	>DPO_RS06625	>DPO_RS06630(COG1151)	>DPO_RS06635(COG0437)	>DPO_RS06640(COG1251)	>DPO_RS06645	>DPO_RS24475	>DPO_RS06650(COG1902)
GCF_000350545.1_DPO2_genomic.gff	-	1286635	Desulfotignum phosphitoxidans DSM 13687	Desulfotignum phosphitoxidans	Desulfotignum	Desulfobacteraceae	Desulfobacterales	Deltaproteobacteria	Proteobacteria	Bacteria	NZ_APJX01000004.1	WP_006965925.1	E	E-1	DPO_RS10820	>DPO_RS10815(COG2069)	>DPO_RS10820(COG1151)	>DPO_RS10825(COG1614)	>DPO_RS10830(COG1456)	>DPO_RS10835(COG1410)	>DPO_RS10840(COG0668)	>DPO_RS10845	>DPO_RS10850(COG3640)
GCF_000350545.1_DPO2_genomic.gff	-	1286635	Desulfotignum phosphitoxidans DSM 13687	Desulfotignum phosphitoxidans	Desulfotignum	Desulfobacteraceae	Desulfobacterales	Deltaproteobacteria	Proteobacteria	Bacteria	NZ_APJX01000011.1	WP_006968052.1	E	E-2	DPO_RS19335	>DPO_RS19315(COG0509)	<DPO_RS19320(COG1913)	<DPO_RS19325(COG2204)	<DPO_RS19330(COG0642)	<DPO_RS19335(COG1151)	<DPO_RS19340(COG1142)	<DPO_RS19345(COG1251)	<DPO_RS19350	<DPO_RS19355	<DPO_RS19360(COG4992)	<DPO_RS19365(COG1802)	<DPO_RS19370
GCF_000350545.1_DPO2_genomic.gff	-	1286635	Desulfotignum phosphitoxidans DSM 13687	Desulfotignum phosphitoxidans	Desulfotignum	Desulfobacteraceae	Desulfobacterales	Deltaproteobacteria	Proteobacteria	Bacteria	NZ_APJX01000016.1	WP_006968607.1	E	E-1	DPO_RS22095	>DPO_RS22065	>DPO_RS22070(COG5653)	>DPO_RS22075(COG0439)	>DPO_RS22080(COG0019)	>DPO_RS22085(COG1433)	>DPO_RS22090(COG0491)	>DPO_RS22095(COG1151)	>DPO_RS22100(COG1309)
GCF_000363885.1_MethanoVillo1.0_genomic.gff	-	1069083	Methanocaldococcus villosus KIN24-T80	Methanocaldococcus villosus	Methanocaldococcus	Methanocaldococcaceae	Methanococcales	Methanococci	Euryarchaeota	Archaea	NZ_APMM01000019.1	WP_017980953.1	A	A-1	J422_RS03040	<J422_RS03025(COG1614)	<J422_RS03030(COG1142)	<J422_RS03035(COG1880)	<J422_RS03040(COG1152)
GCF_000371465.1_Clos_coli_209318_V1_genomic.gff	-	999411	Clostridium colicanis 209318	Clostridium colicanis	Clostridium	Clostridiaceae	Clostridiales	Clostridia	Firmicutes	Bacteria	NZ_KB850956.1	WP_002597805.1	C	C-1	HMPREF1092_RS06300	>HMPREF1092_RS06280(COG3830)	>HMPREF1092_RS06285(COG2848)	>HMPREF1092_RS06290(COG0708)	>HMPREF1092_RS06295(COG1959)	>HMPREF1092_RS06300(COG1151)
GCF_000371465.1_Clos_coli_209318_V1_genomic.gff	-	999411	Clostridium colicanis 209318	Clostridium colicanis	Clostridium	Clostridiaceae	Clostridiales	Clostridia	Firmicutes	Bacteria	NZ_KB850958.1	WP_002599547.1	B	B-1	HMPREF1092_RS15100	<HMPREF1092_RS15100(COG1151)
GCF_000371485.1_Clos_clos_90B1_V1_genomic.gff	-	999409	[Clostridium] clostridioforme 90B1	[Clostridium] clostridioforme	Lachnoclostridium	Lachnospiraceae	Clostridiales	Clostridia	Firmicutes	Bacteria	NZ_KB850969.1	WP_002583275.1	C	C-2	HMPREF1086_RS18020	<HMPREF1086_RS18005(COG0282)	<HMPREF1086_RS18010(COG0280)	<HMPREF1086_RS18015(COG4624)	<HMPREF1086_RS18020(COG1151)	<HMPREF1086_RS18025(COG3870)	<HMPREF1086_RS18030(COG0265)
GCF_000371525.1_Clos_clos_90A7_V1_genomic.gff	-	999407	[Clostridium] clostridioforme 90A7	[Clostridium] clostridioforme	Lachnoclostridium	Lachnospiraceae	Clostridiales	Clostridia	Firmicutes	Bacteria	NZ_KB851045.1	WP_002589474.1	C	C-1	HMPREF1082_RS02560	<HMPREF1082_RS02550(COG1251)	<HMPREF1082_RS02555(COG0437)	<HMPREF1082_RS02560(COG1151)	<HMPREF1082_RS02565(COG1959)	>HMPREF1082_RS02570(COG0534)
GCF_000371645.1_Clos_bolt_90B8_V1_genomic.gff	-	997897	[Clostridium] bolteae 90B8	[Clostridium] bolteae	Lachnoclostridium	Lachnospiraceae	Clostridiales	Clostridia	Firmicutes	Bacteria	NZ_KB851138.1	WP_002570238.1	C	C-1	HMPREF1097_RS01210	<HMPREF1097_RS01200(COG0534)	>HMPREF1097_RS01205(COG1959)	>HMPREF1097_RS01210(COG1151)	>HMPREF1097_RS01215(COG0437)	>HMPREF1097_RS01220(COG1251)
GCF_000371645.1_Clos_bolt_90B8_V1_genomic.gff	-	997897	[Clostridium] bolteae 90B8	[Clostridium] bolteae	Lachnoclostridium	Lachnospiraceae	Clostridiales	Clostridia	Firmicutes	Bacteria	NZ_KB851142.1	WP_002568841.1	C	C-2	HMPREF1097_RS06635	<HMPREF1097_RS06630(COG4624)	<HMPREF1097_RS06635(COG1151)	<HMPREF1097_RS06640(COG2186)	<HMPREF1097_RS06645(COG0329)	<HMPREF1097_RS06650(COG3254)	<HMPREF1097_RS06655(COG3618)	<HMPREF1097_RS06660(COG0673)	<HMPREF1097_RS06665
GCF_000371685.1_Clos_bolt_90B3_V1_genomic.gff	-	997895	[Clostridium] bolteae 90B3	[Clostridium] bolteae	Lachnoclostridium	Lachnospiraceae	Clostridiales	Clostridia	Firmicutes	Bacteria	NZ_KB851179.1	WP_002577503.1	C	C-1	HMPREF1089_RS23260	<HMPREF1089_RS23250(COG0534)	>HMPREF1089_RS23255(COG1959)	>HMPREF1089_RS23260(COG1151)	>HMPREF1089_RS23265(COG0437)	>HMPREF1089_RS23270(COG1251)
GCF_000372005.1_ASM37200v1_genomic.gff	-	1035308	Dehalobacter sp. FTH1	Dehalobacter sp. FTH1	Dehalobacter	Peptococcaceae	Clostridiales	Clostridia	Firmicutes	Bacteria	NZ_AQYY01000010.1	WP_034382361.1	E	E-1	A37G_RS0124520	>A37G_RS0124520(COG1151)	>A37G_RS0124525(COG3640)	>A37G_RS0124530(COG3640)	>A37G_RS0124535(COG2069)	>A37G_RS0124540(COG1456)	>A37G_RS0124545(COG1410)	>A37G_RS0124550(COG1614)	>A37G_RS0124555(COG3894)	>A37G_RS0124560(COG1532)	>A37G_RS0124565
GCF_000373885.1_ASM37388v1_genomic.gff	-	1121114	Blautia producta ATCC 27340 = DSM 2950	Blautia producta	Blautia	Lachnospiraceae	Clostridiales	Clostridia	Firmicutes	Bacteria	NZ_KB892682.1	WP_018597549.1	E	E-1	B132_RS0124130	>B132_RS0124100(COG0420)	>B132_RS0124105(COG0419)	>B132_RS0124110	>B132_RS0124115	>B132_RS0124120(COG0685)	>B132_RS0124125(COG3640)	>B132_RS0124130(COG1151)	>B132_RS0124135(COG3640)	>B132_RS0124140(COG1614)	>B132_RS0124145(COG2069)	>B132_RS0124150(COG1456)	>B132_RS0124155(COG1410)	>B132_RS0124160(COG3894)	>B132_RS0124165	>B132_RS32060(COG4720)	>B132_RS0124175(COG3404)	>B132_RS0124180(COG0190)	>B132_RS0124185(COG1502)	>B132_RS0124190(COG2078)	>B132_RS0124195(COG1180)
GCF_000373885.1_ASM37388v1_genomic.gff	-	1121114	Blautia producta ATCC 27340 = DSM 2950	Blautia producta	Blautia	Lachnospiraceae	Clostridiales	Clostridia	Firmicutes	Bacteria	NZ_KB892702.1	WP_018597958.1	C	C-1	B132_RS0126340	>B132_RS33905(COG1943)	>B132_RS0126340(COG1151)	>B132_RS0126345(COG0437)	>B132_RS0126350(COG1251)
GCF_000373885.1_ASM37388v1_genomic.gff	-	1121114	Blautia producta ATCC 27340 = DSM 2950	Blautia producta	Blautia	Lachnospiraceae	Clostridiales	Clostridia	Firmicutes	Bacteria	NZ_KB892702.1	WP_018598141.1	B	B-1	B132_RS0127275	>B132_RS0127275(COG1151)	>B132_RS0127280(COG0715)	>B132_RS0127285(COG0600)	>B132_RS0127290(COG1116)	>B132_RS0127295	>B132_RS33935	>B132_RS33940
GCF_000375485.1_ASM37548v1_genomic.gff	-	1121459	Desulfovibrio oxyclinae DSM 11498	Desulfovibrio oxyclinae	Desulfovibrio	Desulfovibrionaceae	Desulfovibrionales	Deltaproteobacteria	Proteobacteria	Bacteria	NZ_AQXE01000006.1	WP_018124692.1	E	E-2	B149_RS0108135	>B149_RS0108095(COG0767)	>B149_RS16765(COG1127)	>B149_RS0108105(COG1463)	>B149_RS0108110(COG2854)	>B149_RS0108115(COG2853)	>B149_RS0108120(COG0622)	>B149_RS16770(COG3462)	>B149_RS0108130(COG0664)	>B149_RS0108135(COG1151)	>B149_RS0108140(COG3640)	>B149_RS16775(COG0840)
GCF_000376325.1_ASM37632v1_genomic.gff	-	1121268	Campylobacter curvus DSM 6644	Campylobacter curvus	Campylobacter	Campylobacteraceae	Campylobacterales	Epsilonproteobacteria	Proteobacteria	Bacteria	NZ_AQXN01000008.1	WP_018137276.1	B	B-2	C514_RS0108475	<C514_RS0108475(COG1151)	>C514_RS0108480(COG0715)	>C514_RS0108485(COG0600)	>C514_RS0108490(COG1116)
GCF_000376385.1_ASM37638v1_genomic.gff	-	1121472	Desulfurispora thermophila DSM 16022	Desulfurispora thermophila	Desulfurispora	Peptococcaceae	Clostridiales	Clostridia	Firmicutes	Bacteria	NZ_AQWN01000005.1	WP_018085742.1	F	F-1	B064_RS0107690	>B064_RS0107690(COG1151)	>B064_RS0107695
GCF_000376385.1_ASM37638v1_genomic.gff	-	1121472	Desulfurispora thermophila DSM 16022	Desulfurispora thermophila	Desulfurispora	Peptococcaceae	Clostridiales	Clostridia	Firmicutes	Bacteria	NZ_AQWN01000006.1	WP_018085834.1	D	D-1	B064_RS0108150	<B064_RS0108150(COG1151)	<B064_RS15255	<B064_RS16670
GCF_000376385.1_ASM37638v1_genomic.gff	-	1121472	Desulfurispora thermophila DSM 16022	Desulfurispora thermophila	Desulfurispora	Peptococcaceae	Clostridiales	Clostridia	Firmicutes	Bacteria	NZ_AQWN01000008.1	WP_018086203.1	F	F-1	B064_RS0110020	>B064_RS0110010(COG0318)	<B064_RS0110015(COG1142)	<B064_RS0110020(COG1151)	<B064_RS0110025(COG1251)	<B064_RS0110030	<B064_RS0110035(COG1683)	>B064_RS0110040(COG0318)	>B064_RS0110045(COG0318)
GCF_000376385.1_ASM37638v1_genomic.gff	-	1121472	Desulfurispora thermophila DSM 16022	Desulfurispora thermophila	Desulfurispora	Peptococcaceae	Clostridiales	Clostridia	Firmicutes	Bacteria	NZ_AQWN01000014.1	WP_018087007.1	F	F-1	B064_RS0114195	>B064_RS0114190(COG3640)	>B064_RS0114195(COG1151)	>B064_RS0114200
GCF_000376965.1_ASM37696v1_genomic.gff	-	523845	Methanothermococcus thermolithotrophicus DSM 2095	Methanothermococcus thermolithotrophicus	Methanothermococcus	Methanococcaceae	Methanococcales	Methanococci	Euryarchaeota	Archaea	NZ_AQXV01000021.1	WP_018153340.1	A	A-1	F555_RS0100865	>F555_RS0100855(COG0437)	<F555_RS0100860(COG0009)	<F555_RS0100865(COG1152)	>F555_RS0100870(COG1880)	>F555_RS0100875(COG1153)
GCF_000376965.1_ASM37696v1_genomic.gff	-	523845	Methanothermococcus thermolithotrophicus DSM 2095	Methanothermococcus thermolithotrophicus	Methanothermococcus	Methanococcaceae	Methanococcales	Methanococci	Euryarchaeota	Archaea	NZ_AQXV01000050.1	WP_018154195.1	A	A-1	F555_RS0105375	<F555_RS09305(COG1614)	<F555_RS0105365(COG1142)	<F555_RS0105370(COG1880)	<F555_RS0105375(COG1152)	<F555_RS0105380(COG0107)	<F555_RS0105385(COG0455)	<F555_RS0105390
GCF_000378405.1_ASM37840v1_genomic.gff	-	1265507	Succinimonas amylolytica DSM 2873	Succinimonas amylolytica	Succinimonas	Succinivibrionaceae	Aeromonadales	Gammaproteobacteria	Proteobacteria	Bacteria	NZ_KB899638.1	WP_019002678.1	B	B-1	F557_RS0113100	<F557_RS0113075	<F557_RS0113080(COG0031)	<F557_RS0113085(COG1116)	<F557_RS0113090(COG0600)	<F557_RS0113095(COG0715)	<F557_RS0113100(COG1151)	<F557_RS19965	<F557_RS0113110	<F557_RS0113115	<F557_RS0113120(COG1301)	<F557_RS0113125
GCF_000378805.1_ASM37880v1_genomic.gff	-	872024	Desulfitobacterium hafniense TCP-A	Desulfitobacterium hafniense	Desulfitobacterium	Peptococcaceae	Clostridiales	Clostridia	Firmicutes	Bacteria	NZ_KB900390.1	WP_018210971.1	F	F-1	DESHAF_RS0100550	>DESHAF_RS0100535	>DESHAF_RS0100540(COG0664)	>DESHAF_RS0100545(COG1142)	>DESHAF_RS0100550(COG1151)	>DESHAF_RS0100555(COG3640)
GCF_000378805.1_ASM37880v1_genomic.gff	-	872024	Desulfitobacterium hafniense TCP-A	Desulfitobacterium hafniense	Desulfitobacterium	Peptococcaceae	Clostridiales	Clostridia	Firmicutes	Bacteria	NZ_KB900390.1	WP_018211699.1	F	F-1	DESHAF_RS0105650	>DESHAF_RS0105645(COG3640)	>DESHAF_RS0105650(COG1151)	>DESHAF_RS0105655(COG1614)	>DESHAF_RS0105660(COG1456)	>DESHAF_RS0105665(COG3894)	>DESHAF_RS0105670(COG3640)	>DESHAF_RS0105675(COG2069)	>DESHAF_RS0105680(COG1410)
GCF_000378805.1_ASM37880v1_genomic.gff	-	872024	Desulfitobacterium hafniense TCP-A	Desulfitobacterium hafniense	Desulfitobacterium	Peptococcaceae	Clostridiales	Clostridia	Firmicutes	Bacteria	NZ_KB900391.1	WP_026184139.1	D	D-1	DESHAF_RS0119620	<DESHAF_RS0119600	<DESHAF_RS0119605	<DESHAF_RS0119610(COG2846)	<DESHAF_RS0119615(COG0664)	<DESHAF_RS0119620(COG1151)
GCF_000378805.1_ASM37880v1_genomic.gff	-	872024	Desulfitobacterium hafniense TCP-A	Desulfitobacterium hafniense	Desulfitobacterium	Peptococcaceae	Clostridiales	Clostridia	Firmicutes	Bacteria	NZ_KB900391.1	WP_026184184.1	F	F-1	DESHAF_RS0121435	>DESHAF_RS0121400(COG0438)	<DESHAF_RS0121405(COG0463)	<DESHAF_RS0121410	<DESHAF_RS0121415	<DESHAF_RS0121420(COG1208)	<DESHAF_RS0121425(COG0451)	<DESHAF_RS0121430(COG1251)	<DESHAF_RS0121435(COG1151)	<DESHAF_RS0121440(COG1142)	<DESHAF_RS0121445(COG0664)	<DESHAF_RS0121450(COG1116)	<DESHAF_RS0121455(COG0715)	<DESHAF_RS0121460(COG0600)	<DESHAF_RS0121465(COG0011)	<DESHAF_RS0121470(COG1512)	<DESHAF_RS0121475(COG1704)	<DESHAF_RS0121480(COG1968)	<DESHAF_RS0121485(COG3585)	<DESHAF_RS0121490
GCF_000379025.1_ASM37902v1_genomic.gff	-	926561	Orenia marismortui DSM 5156	Orenia marismortui	Orenia	Halobacteroidaceae	Halanaerobiales	Clostridia	Firmicutes	Bacteria	NZ_KB900618.1	WP_018248459.1	D	D-2	OREMA_RS0106475	<OREMA_RS0106475(COG1151)
GCF_000379025.1_ASM37902v1_genomic.gff	-	926561	Orenia marismortui DSM 5156	Orenia marismortui	Orenia	Halobacteroidaceae	Halanaerobiales	Clostridia	Firmicutes	Bacteria	NZ_KB900619.1	WP_018248871.1	C	C-1	OREMA_RS0108635	<OREMA_RS0108625(COG1251)	<OREMA_RS0108630(COG0437)	<OREMA_RS0108635(COG1151)	<OREMA_RS0108640(COG1959)	<OREMA_RS0108645(COG2378)	<OREMA_RS18350(COG4886)	<OREMA_RS0108655
GCF_000379505.1_ASM37950v1_genomic.gff	-	1090321	Desulfitobacterium hafniense PCP-1	Desulfitobacterium hafniense	Desulfitobacterium	Peptococcaceae	Clostridiales	Clostridia	Firmicutes	Bacteria	NZ_KB902329.1	WP_005813738.1	D	D-1	A37Y_RS0113520	>A37Y_RS0113520(COG1151)	>A37Y_RS0113525(COG0664)	>A37Y_RS0113530(COG2846)	>A37Y_RS0113535	>A37Y_RS0113540
GCF_000379505.1_ASM37950v1_genomic.gff	-	1090321	Desulfitobacterium hafniense PCP-1	Desulfitobacterium hafniense	Desulfitobacterium	Peptococcaceae	Clostridiales	Clostridia	Firmicutes	Bacteria	NZ_KB902351.1	WP_018307042.1	F	F-1	A37Y_RS0120550	<A37Y_RS0120545(COG3640)	<A37Y_RS0120550(COG1151)	<A37Y_RS0120555(COG1142)	<A37Y_RS0120560(COG0664)	<A37Y_RS0120565
GCF_000379505.1_ASM37950v1_genomic.gff	-	1090321	Desulfitobacterium hafniense PCP-1	Desulfitobacterium hafniense	Desulfitobacterium	Peptococcaceae	Clostridiales	Clostridia	Firmicutes	Bacteria	NZ_KB902359.1	WP_011459810.1	F	F-1	A37Y_RS0124695	>A37Y_RS0124690(COG3640)	>A37Y_RS0124695(COG1151)	>A37Y_RS0124700(COG1614)	>A37Y_RS0124705(COG1456)	>A37Y_RS0124710(COG3894)	>A37Y_RS0124715(COG3640)	>A37Y_RS0124720(COG2069)	>A37Y_RS0124725(COG1410)
[truncated: 1,315 more rows]
[truncated: 4 more columns]
